# Supplementary material for: Controlling the regioselectivity of the bromolactonization reaction in HFIP
Source: Royal Society of Chemistry journal article supplement (doi:10.1039/d4sc01503g), 2024-01-01
Supplement: d4sc01503g1.pdf [file d4sc01503g1.pdf]

# Controlling Regioselectivity of Bromolactonization Reaction in HFIP

Tuong Anh To,<sup>†a</sup> Nhu T. A. Phan,<sup>†a</sup> Binh Khanh Mai,<sup>\*b</sup> Thanh Vinh Nguyen<sup>\*a</sup>

[a] School of Chemistry, University of New South Wales, Sydney NSW 2052, Australia.

E-mail: [t.v.nguyen@unsw.edu.au](mailto:t.v.nguyen@unsw.edu.au)

[b] Department of Chemistry, University of Pittsburgh, Pennsylvania 15260, United States.

E-mail: [binh.mai@pitt.edu](mailto:binh.mai@pitt.edu)

<sup>†</sup> Contributed equally

## Supporting Information

## Table of Contents

|                                                                                                      |             |
|------------------------------------------------------------------------------------------------------|-------------|
| <b>General Methods.....</b>                                                                          | <b>S3</b>   |
| <b>Optimization Studies.....</b>                                                                     | <b>S4</b>   |
| <b>Kinetic Studies and Reaction Order in HFIP Solvent.....</b>                                       | <b>S6</b>   |
| <b>Control Experiments.....</b>                                                                      | <b>S9</b>   |
| <b>Synthesis of Starting Materials .....</b>                                                         | <b>S10</b>  |
| <b>General Procedure for the Regioselective endo-Bromolactonization (General Procedure A): .....</b> | <b>S21</b>  |
| <b>General Procedure for the Regioselective exo-Bromolactonization (General Procedure B): .....</b>  | <b>S33</b>  |
| <b>NMR Spectra .....</b>                                                                             | <b>S39</b>  |
| <b>References .....</b>                                                                              | <b>S95</b>  |
| <b>Computational Methods.....</b>                                                                    | <b>S97</b>  |
| <b>Additional Computational Results .....</b>                                                        | <b>S99</b>  |
| <b>Energy and Cartesian Coordinate.....</b>                                                          | <b>S105</b> |

## General Methods

Reactions, unless otherwise stated, were conducted in screw-cap vials under ambient air. Commercially available solvents reagents were used as purchased unless otherwise noted. Analytical thin layer chromatography was performed using silica gel plates pre-coated with silica gel 60 F<sub>254</sub> (0.2 mm). Flash chromatography employed 230-400 mesh silica gel. Solvents used for chromatography are quoted as volume/volume ratios.

NMR spectroscopy was performed at 298 K using either a Bruker Avance III 300 (300.13 MHz, <sup>1</sup>H; 75.5 MHz, <sup>13</sup>C; BBFO probe), an Avance I 300 (300.13 MHz, <sup>1</sup>H; 75.5 MHz, <sup>13</sup>C; BBFO probe) or an Avance III 400 (400.13 MHz, <sup>1</sup>H; 100.6 MHz, <sup>13</sup>C; BBFO probe or Prodigy cryoprobe). Data is expressed in parts per million (ppm) downfield shift from tetramethylsilane with residual solvent as an internal reference ( $\delta$  7.26 ppm for chloroform) and is reported as position ( $\delta$  in ppm), multiplicity (s = singlet, d = doublet, t = triplet, q = quartet, p = pentet, m = multiplet), coupling constant ( $J$  in Hz) and integration (number of protons). <sup>13</sup>C NMR spectra were recorded at 298 K with complete proton decoupling. Data is expressed in parts per million (ppm) downfield shift relative to the internal reference ( $\delta$  77.2 ppm for the central peak of deuterated chloroform).

Infrared spectra were obtained on a ThermoNicolet Avatar 370 FT-IR spectrometer and are reported in wavenumbers (cm<sup>-1</sup>). HRMS were performed at the Bioanalytical Mass Spectrometry Facility within the Mark Wainwright Analytical Centre at the University of New South Wales on an Orbitrap LTQ XL (Thermo Fisher Scientific, San Jose, CA, USA) ion trap mass spectrometer.

## Optimization Studies

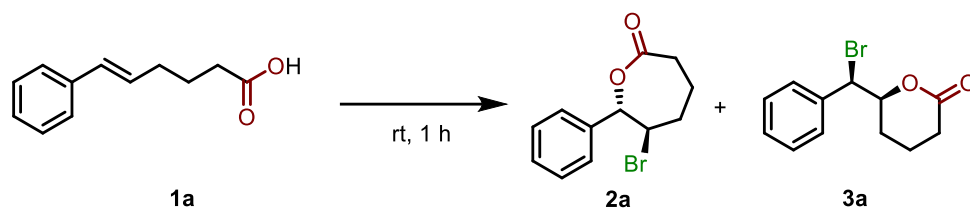

| Entry <sup>[a]</sup> | Catalyst               | NBS              | Solvent                   | Yield of 2a <sup>[b]</sup> | Yield of 3a <sup>[b]</sup> |
|----------------------|------------------------|------------------|---------------------------|----------------------------|----------------------------|
| <b>1</b>             | <b>no cat</b>          | <b>1.1 equiv</b> | <b>HFIP (0.1 M)</b>       | <b>91%</b>                 | <b>7%</b>                  |
| 2                    | no cat                 | 1.1 equiv        | TFE (0.1 M)               | 29%                        | 60%                        |
| 3                    | no cat                 | 1.1 equiv        | <i>i</i> PrOH (0.1 M)     | -                          | -                          |
| 4                    | no cat                 | 1.1 equiv        | DCE (0.1 M)               | -                          | -                          |
| 5                    | no cat                 | 1.1 equiv        | MeNO <sub>2</sub> (0.1 M) | Trace                      | Trace                      |
| 6                    | no cat                 | 1.1 equiv        | HFIP (0.05 M)             | 91%                        | 6%                         |
| 7                    | no cat                 | 1.1 equiv        | HFIP (0.2 M)              | 86%                        | 12%                        |
| 8                    | no cat                 | 1.1 equiv        | HFIP (0.5 M)              | 68%                        | 14%                        |
| 9                    | no cat                 | 1.1 equiv        | HFIP (1 M)                | 51%                        | 15%                        |
| 10                   | no cat                 | 1.1 equiv        | 9DCE:HFIP (0.1 M)         | 71%                        | Trace                      |
| 11                   | no cat                 | 1.1 equiv        | 7DCE:3HFIP (0.1 M)        | 85%                        | 9%                         |
| 12                   | no cat                 | 1.1 equiv        | 5DCE:5HFIP (0.1 M)        | 85%                        | 8%                         |
| 13                   | no cat                 | 1.1 equiv        | 3DCE:7HFIP (0.1 M)        | 88%                        | 10%                        |
| 14                   | no cat                 | 1 equiv          | HFIP (0.1 M)              | 86%                        | 7%                         |
| 15                   | no cat                 | 1.2 equiv        | HFIP (0.1 M)              | 90%                        | 7%                         |
| 16                   | no cat                 | 1.5 equiv        | HFIP (0.1 M)              | 91%                        | 8%                         |
| 17                   | no cat                 | 2 equiv          | HFIP (0.1 M)              | 85%                        | 8%                         |
| 18                   | TfOH (10 mol%)         | 1.1 equiv        | HFIP (0.1 M)              | -                          | 86%                        |
| 19                   | TfOH (10 mol%)         | 1.1 equiv        | TFE (0.1 M)               | 18%                        | 12%                        |
| 20                   | TfOH (10 mol%)         | 1.1 equiv        | <i>i</i> PrOH (0.1 M)     | 22%                        | 29%                        |
| 21                   | TfOH (10 mol%)         | 1.1 equiv        | DCE (0.1 M)               | -                          | 25%                        |
| 22                   | TfOH (10 mol%)         | 1.1 equiv        | MeNO <sub>2</sub> (0.1 M) | -                          | 45%                        |
| 23                   | <i>p</i> TSA (10 mol%) | 1.1 equiv        | HFIP (0.1 M)              | -                          | 89%                        |
| 24                   | TFA (10 mol%)          | 1.1 equiv        | HFIP (0.1 M)              | 67%                        | 20%                        |
| 25                   | AcOH (10 mol%)         | 1.1 equiv        | HFIP (0.1 M)              | 88%                        | 10%                        |

|    |                             |                  |                           |     |            |
|----|-----------------------------|------------------|---------------------------|-----|------------|
| 26 | <i>p</i> TSA (1 mol%)       | 1.1 equiv        | HFIP (0.1 M)              | -   | 77%        |
| 27 | <i>p</i> TSA (2 mol%)       | 1.1 equiv        | HFIP (0.1 M)              | -   | 79%        |
| 28 | <b><i>p</i>TSA (5 mol%)</b> | <b>1.1 equiv</b> | <b>HFIP (0.1 M)</b>       | -   | <b>87%</b> |
| 29 | <i>p</i> TSA (20 mol%)      | 1.1 equiv        | HFIP (0.1 M)              | -   | 84%        |
| 30 | <i>p</i> TSA (5 mol%)       | 1.1 equiv        | HFIP (0.05 M)             | -   | 87%        |
| 31 | <i>p</i> TSA (5 mol%)       | 1.1 equiv        | HFIP (0.2 M)              | -   | 81%        |
| 32 | <i>p</i> TSA (5 mol%)       | 1.1 equiv        | HFIP (0.5 M)              | -   | 67%        |
| 33 | <i>p</i> TSA (5 mol%)       | 1.1 equiv        | HFIP (1 M)                | -   | 54%        |
| 34 | <i>p</i> TSA (5 mol%)       | 1.1 equiv        | 9DCE:HFIP (0.1 M)         | 43% | 12%        |
| 35 | <i>p</i> TSA (5 mol%)       | 1.1 equiv        | 7DCE:3HFIP (0.1 M)        | 9%  | 38%        |
| 36 | <i>p</i> TSA (5 mol%)       | 1.1 equiv        | 5DCE:5HFIP (0.1 M)        | -   | 70%        |
| 37 | <i>p</i> TSA (5 mol%)       | 1.1 equiv        | 3DCE:7HFIP (0.1 M)        | -   | 83%        |
| 38 | <i>p</i> TSA (5 mol%)       | 1 equiv          | HFIP (0.1 M)              | -   | 82%        |
| 39 | <i>p</i> TSA (5 mol%)       | 1.2 equiv        | HFIP (0.1 M)              | -   | 83%        |
| 40 | <i>p</i> TSA (5 mol%)       | 1.5 equiv        | HFIP (0.1 M)              | -   | 85%        |
| 41 | <i>p</i> TSA (5 mol%)       | 2 equiv          | HFIP (0.1 M)              | -   | 85%        |
| 42 | <i>p</i> TSA (5 mol%)       | 1.1 equiv        | TFE (0.1 M)               | 22% | 12%        |
| 43 | <i>p</i> TSA (5 mol%)       | 1.1 equiv        | <i>i</i> PrOH (0.1 M)     | 13% | 5%         |
| 44 | <i>p</i> TSA (5 mol%)       | 1.1 equiv        | DCE (0.1 M)               | 11% | 5%         |
| 45 | <i>p</i> TSA (5 mol%)       | 1.1 equiv        | MeNO <sub>2</sub> (0.1 M) | 17% | 20%        |

[a] Reaction was carried out on 0.2 mmol scale of substrate **1a**; [b] Yields were determined by <sup>1</sup>H NMR integration using methyl benzoate as an internal standard.

## Kinetic Studies and Reaction Order in HFIP Solvent

Kinetic studies were carried out by monitoring the reaction of substrate **1a** (0.1 mmol) and NBS (1.1 equiv, 39.2 mg) with varying amount of HFIP from 1.5 – 5 equivalents in CD<sub>2</sub>Cl<sub>2</sub> within 60 minutes. The volume of CD<sub>2</sub>Cl<sub>2</sub> was adjusted with the changing volume of HFIP so that the total volume of the reaction was fixed at 1.0 mL (the initial concentration of substrate **1a** was 0.1 M for all kinetic runs). Conversion of substrate **1a** was quantified by <sup>1</sup>H NMR spectroscopy analysis of aliquots of the reaction mixture in CDCl<sub>3</sub> with methyl benzoate as internal standard. We applied a standard error range of ±5% for conversion to all figures, as this is the commonly accepted error for <sup>1</sup>H NMR integration. We also applied a ± 5% error range for reaction time.

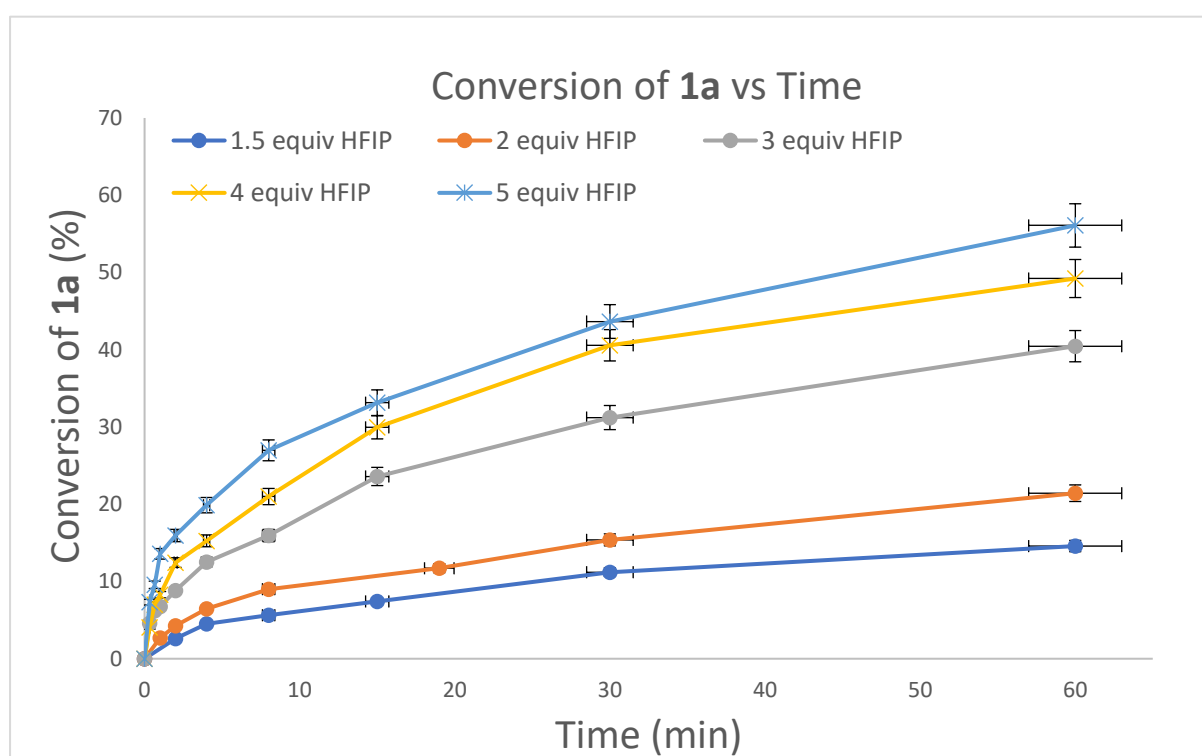

Initial rates were approximated within the range of the first 10% conversion. The following assumptions are made:

- The difference in polarity of the reaction medium was negligible and did not alter the reaction profile when the amount of HFIP was varied. Indeed, with the amount of CD<sub>2</sub>Cl<sub>2</sub> being 18 – 62 times the volume of HFIP, the overall polarity of the reaction mixture does not change significantly.
- The reaction rate can be calculated as:

$$rate = k[HFIP]^x[1a]^y[NBS]^z$$

[1a] and [NBS] can be approximated as negligibly changed in the first 10% conversion range, we can assume that:

$$rate = k'[HFIP]^x$$

or

$$\ln[rate] = x*\ln[HFIP] + \ln k' = x*\ln[HFIP \text{ equivalent}] + \text{constant}$$

with  $[HFIP] = 0.1*[HFIP \text{ equivalent}]$  M. Therefore, a plot of  $\ln[rate]$  vs.  $\ln[HFIP \text{ equivalent}]$  should give the slope x, which is the reaction order in HFIP.

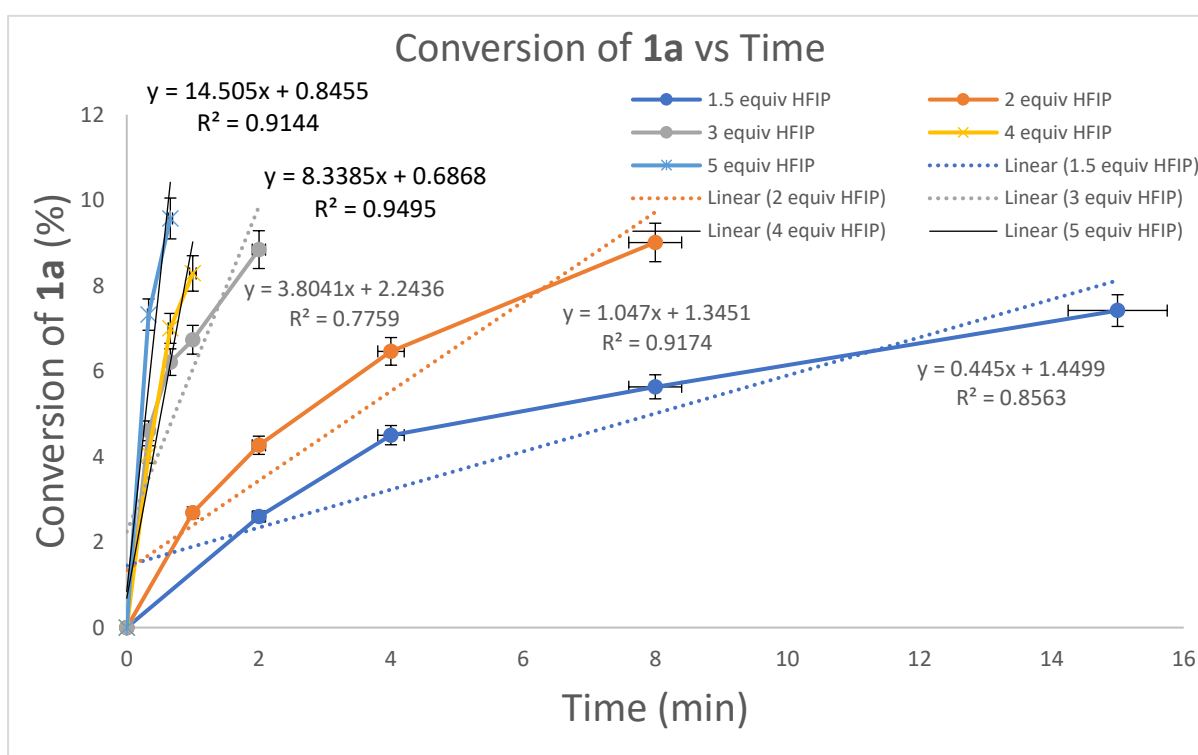

| HFIP equiv | Initial rate | ln(HFIP equiv) | ln(initial rate) |
|------------|--------------|----------------|------------------|
| 1.5        | 0.445        | 0.405          | -0.787           |
| 2          | 1.047        | 0.693          | 0.046            |
| 3          | 3.8041       | 1.099          | 1.336            |
| 4          | 8.3385       | 1.386          | 2.121            |
| 5          | 14.505       | 1.609          | 2.674            |

ln(initial rate) was plotted against ln(HFIP equivalent) to give the reaction order in HFIP:

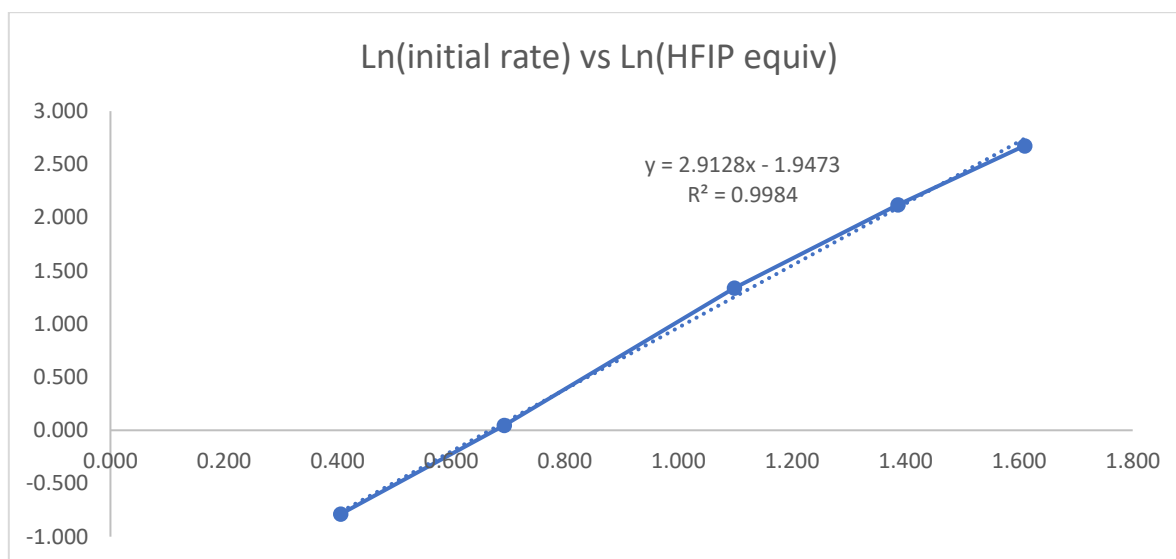

The reaction order in HFIP is approximately 2.9.



## Control Experiments

Experiment to confirm *endo*-product **2a** is convertible to *exo*-product **3a**

To a solution of **1a** (0.2 mmol) in HFIP (0.1 M) in a screw-cap vial equipped with a stirrer bar was added NBS (1.1 equiv, 39.2 mg). The vial was capped, and the reaction was stirred at room temperature for 1 h. After the *endo*-bromolactonization step was finished, methyl benzoate as an internal standard (0.33 equiv) was added. Aliquots withdrawn from the reaction was analyzed by <sup>1</sup>H NMR to determine yield of **2a** and **3a**. TfOH or pTSA (5 mol%) was then added, and the reaction mixture was stirred at room temperature for 1 h. After the next step finished, <sup>1</sup>H NMR analysis was performed again to observe the conversion of *endo*-product **2a** to *exo*-product **3a**. NMR yields of products were showed as below.

For the experiments carried out in DCE, after the *endo*-bromolactonization step was finished, HFIP was remove under reduced pressure prior to DCE (0.1 M) was added as the solvent for isomerization step.

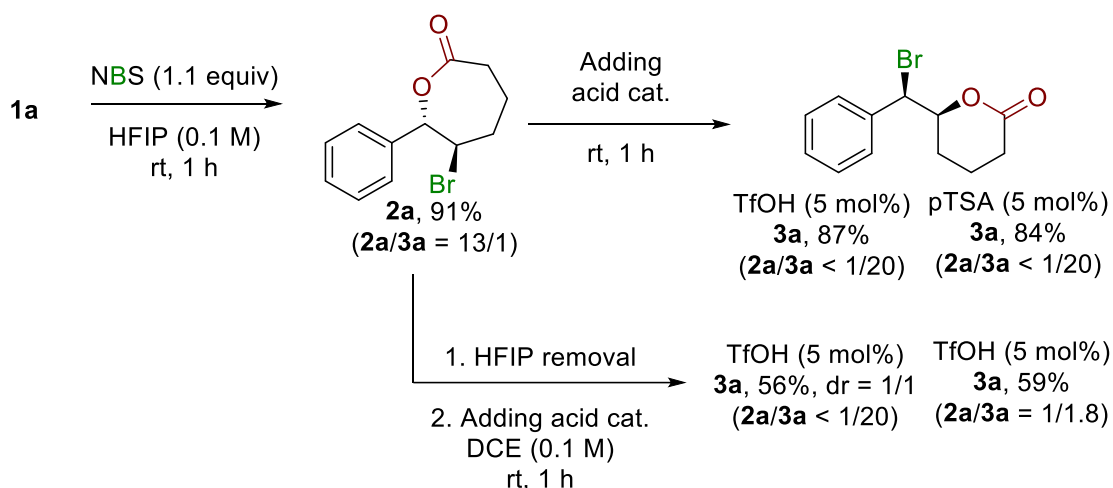

## Synthesis of Starting Materials

Alkenoic acid **1a**, **1b**, **1c**, **1d**, **1e**, **1g**, **1h**, **1i**, **2j**, **1l**, and **1m** were synthesized through the ring-opening olefination of cyclic ketone ketals according to our previous work.<sup>1</sup> **1o** was acquired from our previous work.<sup>1</sup>

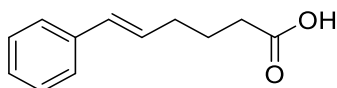

**(E)-6-phenylhex-5-enoic acid (1a)**: Prepared from benzaldehyde and cyclopentanone pinacol ketal. The reaction yield was comparable to previously reported synthetic method and spectral data were in accordance with those previously reported.<sup>1</sup>

<sup>1</sup>H NMR (400 MHz, CDCl<sub>3</sub>)  $\delta$  7.36 – 7.27 (m, 4H), 7.25 – 7.16 (m, 1H), 6.42 (d,  $J$  = 15.8 Hz, 1H), 6.18 (dt,  $J$  = 15.8, 6.9 Hz, 1H), 2.42 (t,  $J$  = 7.4 Hz, 2H), 2.29 (qd,  $J$  = 7.2, 1.5 Hz, 2H), 1.83 (p,  $J$  = 7.4 Hz, 2H);

<sup>13</sup>C NMR (101 MHz, CDCl<sub>3</sub>)  $\delta$  179.7, 137.7, 131.1, 129.4, 128.6 (2C), 127.2, 126.1 (2C), 33.4, 32.4, 24.4.

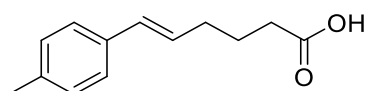

**(E)-6-(*p*-tolyl)hex-5-enoic acid (1b)**: Prepared from 4-methylbenzaldehyde and cyclopentanone pinacol ketal. The reaction yield was comparable to previously reported synthetic method and spectral data were in accordance with those previously reported.<sup>1</sup>

<sup>1</sup>H NMR (400 MHz, CDCl<sub>3</sub>)  $\delta$  7.26 – 7.21 (m, 2H), 7.10 (d,  $J$  = 7.7 Hz, 2H), 6.38 (d,  $J$  = 15.8 Hz, 1H), 6.12 (dt,  $J$  = 15.8, 7.0 Hz, 1H), 2.41 (t,  $J$  = 7.5 Hz, 2H), 2.33 (s, 3H), 2.27 (qd,  $J$  = 7.2, 1.4 Hz, 2H), 1.83 (p,  $J$  = 7.4 Hz, 2H);

<sup>13</sup>C NMR (101 MHz, CDCl<sub>3</sub>)  $\delta$  179.8, 136.9, 134.9, 131.0, 129.3 (2C), 128.4, 126.0 (2C), 33.4, 32.4, 24.4, 21.3.

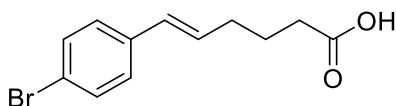

**(E)-6-(4-bromophenyl)hex-5-enoic acid (1c):** Prepared from 4-bromobenzaldehyde and cyclopentanone pinacol ketal. The reaction yield was comparable to previously reported synthetic method and spectral data were in accordance with those previously reported.<sup>1</sup>

**<sup>1</sup>H NMR (400 MHz, CDCl<sub>3</sub>)**  $\delta$  7.44 – 7.37 (m, 2H), 7.22 – 7.17 (m, 2H), 6.34 (dt,  $J$  = 15.9, 1.5 Hz, 1H), 6.17 (dt,  $J$  = 15.8, 6.9 Hz, 1H), 2.40 (t,  $J$  = 7.4 Hz, 2H), 2.27 (qd,  $J$  = 7.2, 1.4 Hz, 2H), 1.82 (p,  $J$  = 7.4 Hz, 2H);

**<sup>13</sup>C NMR (101 MHz, CDCl<sub>3</sub>)**  $\delta$  179.6, 136.6, 131.7 (2C), 130.4, 130.0, 127.7 (2C), 120.8, 33.4, 32.4, 24.2.

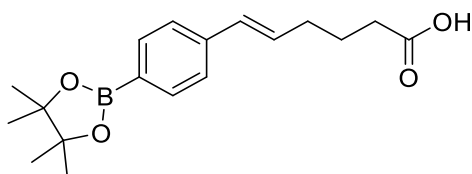

**(E)-6-(4-(4,4,5,5-tetramethyl-1,3,2-dioxaborolan-2-yl)phenyl)hex-5-enoic acid (1d):** Prepared from 4-(4,4,5,5-tetramethyl-1,3,2-dioxaborolan-2-yl)benzaldehyde and cyclopentanone pinacol ketal. The reaction yield was comparable to previously reported synthetic method and spectral data were in accordance with those previously reported.<sup>1</sup>

**<sup>1</sup>H NMR (400 MHz, CDCl<sub>3</sub>)**  $\delta$  7.76 – 7.71 (m, 2H), 7.36 – 7.31 (m, 2H), 6.42 (d,  $J$  = 15.9 Hz, 1H), 6.25 (dt,  $J$  = 15.8, 6.9 Hz, 1H), 2.41 (t,  $J$  = 7.4 Hz, 2H), 2.32 – 2.25 (m, 2H), 1.83 (p,  $J$  = 7.4 Hz, 2H), 1.34 (s, 12H);

**<sup>13</sup>C NMR (101 MHz, CDCl<sub>3</sub>)**  $\delta$  179.4, 140.4, 135.2 (2C), 131.2, 130.6, 125.5 (2C), 83.9, 33.4, 32.4, 25.0 (4C), 24.3;

**<sup>11</sup>B NMR (128 MHz, CDCl<sub>3</sub>)**  $\delta$  30.7.

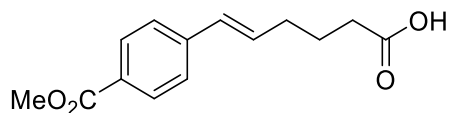

**(E)-6-(4-(methoxycarbonyl)phenyl)hex-5-enoic acid (1e):** Prepared from methyl 4-formylbenzoate and cyclopentanone pinacol ketal. The reaction yield was comparable to previously reported synthetic method and spectral data were in accordance with those previously reported.<sup>1</sup>

**<sup>1</sup>H NMR (400 MHz, CDCl<sub>3</sub>)**  $\delta$  7.98 – 7.94 (m, 2H), 7.41 – 7.36 (m, 2H), 6.44 (d,  $J$  = 15.8 Hz, 1H), 6.31 (dt,  $J$  = 15.8, 6.8 Hz, 1H), 3.90 (s, 3H), 2.42 (t,  $J$  = 7.4 Hz, 2H), 2.31 (q,  $J$  = 7.6 Hz, 2H), 1.84 (p,  $J$  = 7.4 Hz, 2H);

**<sup>13</sup>C NMR (101 MHz, CDCl<sub>3</sub>)**  $\delta$  179.4, 167.1, 142.1, 132.4, 130.3 (2C), 130.0 (2C), 128.6, 126.0, 52.2, 33.4, 32.4, 24.1.

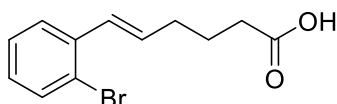

**(E)-6-(2-bromophenyl)hex-5-enoic acid (1g):** Prepared from 2-bromobenzaldehyde and cyclopentanone pinacol ketal. The reaction yield was comparable to previously reported synthetic method and spectral data were in accordance with those previously reported.<sup>1</sup>

**<sup>1</sup>H NMR (400 MHz, CDCl<sub>3</sub>)**  $\delta$  7.53 (dd,  $J$  = 8.0, 1.3 Hz, 1H), 7.47 (dd,  $J$  = 7.8, 1.7 Hz, 1H), 7.25 – 7.22 (m, 1H), 7.07 (td,  $J$  = 7.8, 1.7 Hz, 1H), 6.74 (d,  $J$  = 15.7 Hz, 1H), 6.12 (dt,  $J$  = 15.7, 7.0 Hz, 1H), 2.44 (t,  $J$  = 7.4 Hz, 2H), 2.33 (qd,  $J$  = 7.2, 1.5 Hz, 2H), 1.86 (p,  $J$  = 7.4 Hz, 2H);

**<sup>13</sup>C NMR (101 MHz, CDCl<sub>3</sub>)**  $\delta$  179.5, 137.5, 133.0, 132.6, 130.0, 128.5, 127.6, 127.0, 123.4, 33.4, 32.4, 24.2.

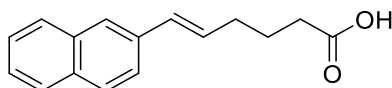

**(E)-6-(naphthalen-2-yl)hex-5-enoic acid (1h):** Prepared from 2-naphthaldehyde and cyclopentanone pinacol ketal. The reaction yield was comparable to previously reported synthetic method and spectral data were in accordance with those previously reported.<sup>1</sup>

**<sup>1</sup>H NMR (400 MHz, CDCl<sub>3</sub>)**  $\delta$  7.78 (t,  $J = 7.8$  Hz, 3H), 7.68 (s, 1H), 7.57 (dd,  $J = 8.6, 1.7$  Hz, 1H), 7.48 – 7.39 (m, 2H), 6.58 (d,  $J = 15.8$  Hz, 1H), 6.31 (dt,  $J = 15.8, 7.0$  Hz, 1H), 2.42 (t,  $J = 7.4$  Hz, 2H), 2.33 (qd,  $J = 7.2, 1.4$  Hz, 2H), 1.86 (p,  $J = 7.4$  Hz, 2H);

**<sup>13</sup>C NMR (101 MHz, CDCl<sub>3</sub>)**  $\delta$  179.7, 135.1, 133.8, 132.9, 131.2, 129.9, 128.2, 128.0, 127.8, 126.3, 125.7, 125.7, 123.7, 33.4, 32.5, 24.4.

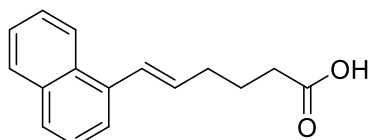

**(E)-6-(naphthalen-1-yl)hex-5-enoic acid (1i):** Prepared from 1-naphthaldehyde and cyclopentanone pinacol ketal. The reaction yield was comparable to previously reported synthetic method and spectral data were in accordance with those previously reported.<sup>1</sup>

**<sup>1</sup>H NMR (400 MHz, CDCl<sub>3</sub>)**  $\delta$  8.14 – 8.09 (m, 1H), 7.84 (dd,  $J = 7.9, 1.6$  Hz, 1H), 7.75 (d,  $J = 8.2$  Hz, 1H), 7.57 – 7.40 (m, 4H), 7.16 (d,  $J = 15.6$  Hz, 1H), 6.20 (dt,  $J = 15.5, 7.0$  Hz, 1H), 2.49 (t,  $J = 7.4$  Hz, 2H), 2.42 (qd,  $J = 7.2, 1.6$  Hz, 2H), 1.92 (p,  $J = 7.4$  Hz, 2H);

**<sup>13</sup>C NMR (101 MHz, CDCl<sub>3</sub>)**  $\delta$  179.7, 135.5, 133.7, 132.8, 131.2, 128.6, 128.4, 127.6, 126.0, 125.8, 125.8, 124.0, 123.8, 33.5, 32.8, 24.4.

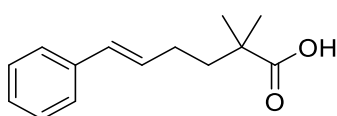

**(E)-2,2-dimethyl-6-phenylhex-5-enoic acid (1j):** Prepared from benzaldehyde and 2,2-dimethylcyclopentanone neopentyl glycol ketal. The reaction yield was comparable to previously reported synthetic method and spectral data were in accordance with those previously reported.<sup>1</sup>

**<sup>1</sup>H NMR (400 MHz, CDCl<sub>3</sub>)**  $\delta$  7.34 – 7.26 (m, 4H), 7.21 – 7.16 (m, 1H), 6.40 (d,  $J = 15.8$  Hz, 1H), 6.20 (dt,  $J = 15.8, 6.8$  Hz, 1H), 2.26 – 2.19 (m, 2H), 1.77 – 1.71 (m, 2H), 1.25 (s, 6H);

**<sup>13</sup>C NMR (101 MHz, CDCl<sub>3</sub>)**  $\delta$  184.4, 137.8, 130.3, 130.3, 128.6 (2C), 127.1, 126.1 (2C), 42.1, 40.1, 28.7, 25.2 (2C).

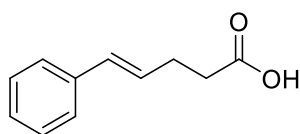

**(E)-5-phenylpent-4-enoic acid (1l):** Prepared from benzaldehyde and cyclobutanone ethylene glycol ketal. The reaction yield was comparable to previously reported synthetic method and spectral data were in accordance with those previously reported.<sup>1</sup>

<sup>1</sup>H NMR (400 MHz, CDCl<sub>3</sub>)  $\delta$  7.37 – 7.33 (m, 2H), 7.33 – 7.28 (m, 2H), 7.24 – 7.19 (m, 1H), 6.46 (d,  $J$  = 15.7 Hz, 1H), 6.27 – 6.17 (m, 1H), 2.56 (d,  $J$  = 2.5 Hz, 4H);

<sup>13</sup>C NMR (101 MHz, CDCl<sub>3</sub>)  $\delta$  179.3, 137.4, 131.4, 128.7 (2C), 128.1, 127.4, 126.2 (2C), 33.9, 28.0.

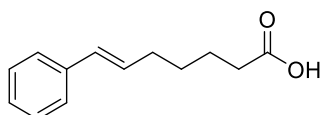

**(E)-7-phenylhept-6-enoic acid (1m):** Prepared from benzaldehyde and cyclohexanone ethylene glycol ketal. The reaction yield was comparable to previously reported synthetic method and spectral data were in accordance with those previously reported.<sup>1</sup>

<sup>1</sup>H NMR (400 MHz, CDCl<sub>3</sub>)  $\delta$  7.36 – 7.27 (m, 4H), 7.22 – 7.17 (m, 1H), 6.40 (d,  $J$  = 15.8 Hz, 1H), 6.21 (dt,  $J$  = 15.8, 6.9 Hz, 1H), 2.40 (t,  $J$  = 7.4 Hz, 2H), 2.25 (qd,  $J$  = 7.2, 1.4 Hz, 2H), 1.71 (dt,  $J$  = 15.0, 7.5 Hz, 2H), 1.59 – 1.50 (m, 2H);

<sup>13</sup>C NMR (101 MHz, CDCl<sub>3</sub>)  $\delta$  179.9, 137.8, 130.4, 130.3, 128.6 (2C), 127.0, 126.1 (2C), 34.0, 32.7, 28.8, 24.3.

**1f** and **1k** were synthesized by Wittig olefination according to the following procedure:

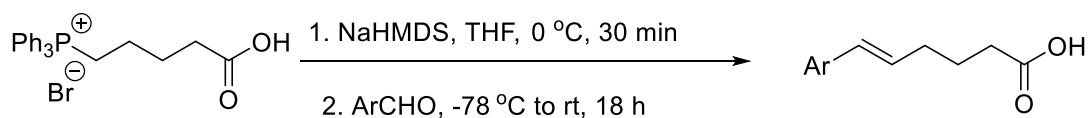

To an oven-dried round bottom flask equipped with a stir bar was added (4-carboxypropyl)triphenylphosphonium bromide (1.2 equiv). The flask was sealed by a septum,

evacuated, and backfilled with nitrogen for three times. Dry THF (20 mL) was added before the resulting suspension was cooled to 0 °C. Sodium bis(trimethylsilyl)amide 1 M solution in THF (2.4 equiv, 24 mL) was added dropwise. The mixture was stirred for 30 min until an orange suspension formed. The mixture was then cooled to -78 °C, and aromatic aldehyde (10 mmol) was added over 20 min. After addition was complete, the reaction was warmed up to room temperature and stirred for 18 h. The reaction was then quenched with HCl (1M) to pH = 2, extracted by Et<sub>2</sub>O (3 × 20 mL). The combined organic layer was washed with brine (20 mL), dried over anhydrous Na<sub>2</sub>SO<sub>4</sub>, and concentrated under reduced pressure to dryness. The alkenoic acid was purified over silica gel eluting with hexanes/ethyl acetate/formic acid (4/1/0.04) to afford alkenoic acid.

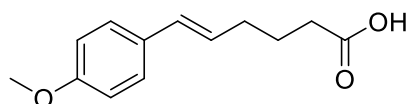

**(E)-6-(4-methoxyphenyl)hex-5-enoic acid (1f):** Prepared according to the general procedure from 4-methoxybenzaldehyde. Spectral data were in accordance with those previously reported.<sup>2</sup>

<sup>1</sup>H NMR (400 MHz, CDCl<sub>3</sub>) δ 7.29 – 7.25 (m, 2H), 6.86 – 6.82 (m, 2H), 6.35 (d, *J* = 15.8 Hz, 1H), 6.03 (dt, *J* = 15.8, 7.0 Hz, 1H), 3.80 (s, 3H), 2.41 (t, *J* = 7.5 Hz, 2H), 2.26 (qd, *J* = 7.2, 1.5 Hz, 2H), 1.82 (p, *J* = 7.4 Hz, 2H);

<sup>13</sup>C NMR (101 MHz, CDCl<sub>3</sub>) δ 179.7, 158.9, 130.5, 130.5, 127.3, 127.2 (2C), 114.1 (2C), 55.4, 33.4, 32.4, 24.5.

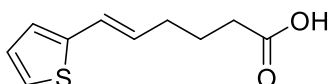

**(E)-6-(thiophen-2-yl)hex-5-enoic acid (1k):** Prepared according to the general procedure from thiophene-2-carbaldehyde, yielding **1k** as an inseparable mixture of *E* and *Z* isomers (*E/Z* = 6/1). Spectral data were in accordance with those previously reported.<sup>2</sup> Due to the low intensity of signals of the minor *Z* isomer, only signals of the major *E* isomer were reported below.

**<sup>1</sup>H NMR (400 MHz, CDCl<sub>3</sub>)** δ 7.09 (d, *J* = 5.1 Hz, 1H), 6.93 (dd, *J* = 5.1, 3.5 Hz, 1H), 6.88 (d, *J* = 3.0 Hz, 1H), 6.54 (ddq, *J* = 15.7, 1.6, 0.8 Hz, 1H), 6.02 (dt, *J* = 15.6, 7.0 Hz, 1H), 2.41 (t, *J* = 7.5 Hz, 2H), 2.25 (qd, *J* = 7.2, 1.5 Hz, 2H), 1.82 (t, *J* = 7.4 Hz, 2H);  
**<sup>13</sup>C NMR (101 MHz, CDCl<sub>3</sub>)** δ 179.7, 142.8, 129.4, 127.4, 124.7, 124.4, 123.5, 33.4, 32.1, 24.3.

**(*E*)-2,2-dimethyl-7-phenylhept-6-enoic acid (1n):**

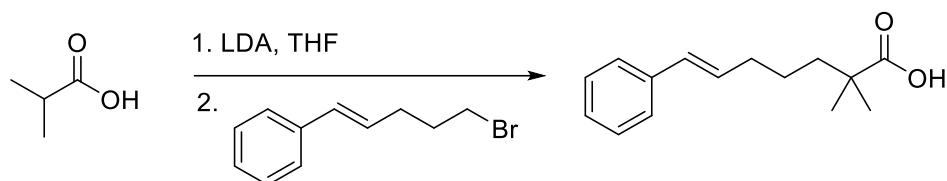

To an oven-dried round-bottom flask equipped with a stir bar was added isobutyric acid (5 mmol) and dry THF (10 mL) under nitrogen atmosphere. The resulting solution was cooled to 0 °C, added lithium diisopropylamide 2 M solution in THF (2.2 equiv, 5.5 mL) dropwise, then stirred for 30 minutes. The resulting mixture was cooled to -78 °C before adding (*E*)-(5-bromopent-1-en-1-yl)benzene<sup>3</sup> (1.1 equiv) dropwise. The reaction was then warmed up to room temperature and stirred overnight. The reaction was quenched by adding water (10 mL), acidified to pH 2 by HCl (1 M). Organic compounds were extracted to diethyl ether (3 × 10 mL), washed with brine (10 mL), dried over anhydrous Na<sub>2</sub>SO<sub>4</sub>, and concentrated under reduced pressure. The residue was purified by silica gel chromatography eluting hexanes/ethyl acetate/formic acid (4/1/0.04) to afford the title compound (904 mg, 78% yield) as a white solid.

**<sup>1</sup>H NMR (400 MHz, CDCl<sub>3</sub>)** δ 7.39 – 7.34 (m, 2H), 7.35 – 7.29 (m, 2H), 7.25 – 7.19 (m, 1H), 6.41 (dt, *J* = 15.8, 1.6 Hz, 1H), 6.23 (dt, *J* = 15.8, 6.8 Hz, 1H), 2.24 (qd, *J* = 7.1, 1.5 Hz, 2H), 1.69 – 1.59 (m, 2H), 1.55 – 1.45 (m, 2H), 1.24 (s, 6H);  
**<sup>13</sup>C NMR (101 MHz, CDCl<sub>3</sub>)** δ 184.4, 137.8, 130.4, 130.2, 128.5, 126.9, 126.0, 125.9, 42.1, 40.1, 33.4, 25.0, 24.7;

**ESI-HRMS:** calcd for C<sub>15</sub>H<sub>20</sub>O<sub>2</sub>Na<sup>+</sup>: *m/z* = 255.1356, found: *m/z* = 255.1349;

**FTIR (neat):** 3022, 2983, 2905, 1689, 1476 1447, 1404, 1284, 1205 cm<sup>-1</sup>.



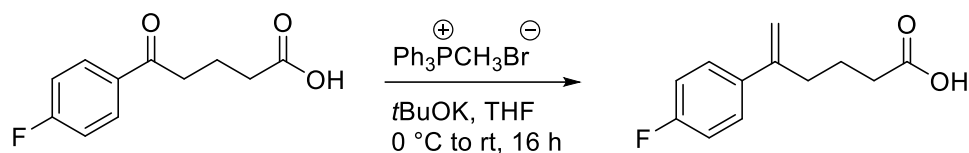

**(E)-6-(4-fluorophenyl)hex-5-enoic acid (1p):** To an oven-dried round bottom flask equipped with a stir bar was added methyltriphenylphosphonium bromide (1.3 equiv) and potassium *tert*-butoxide (2.6 equiv). The flask was sealed by a septum then evacuated and backfilled with nitrogen for three times. Dry THF (20 mL) was added by syringe at 0 °C, and the resulting yellow reaction mixture was stirred for 30 min. 5-(4-fluorophenyl)-5-oxopentanoic acid (10 mmol, 2100 mg) in dry THF was added dropwise and the reaction mixture was stirred at 0 °C for 1 h and at room temperature for 16 h. The reaction was then quenched with HCl (1M) to pH = 2, extracted by Et<sub>2</sub>O (3 × 20 mL). The combined organic layer was washed with brine (10 mL), dried over anhydrous Na<sub>2</sub>SO<sub>4</sub>, and concentrated under reduced pressure to dryness. The crude residue was purified by silica gel chromatography eluting hexanes/ethyl acetate/formic acid (4/1/0.04) to afford the title compound (686 mg, 33% yield) as a yellow solid. Spectral data were in accordance with those previously reported.<sup>4</sup>

**<sup>1</sup>H NMR (400 MHz, CDCl<sub>3</sub>)** δ 7.64 – 7.58 (m, 2H), 7.30 – 7.22 (m, 2H), 5.51 (d, *J* = 1.3 Hz, 1H), 5.31 (d, *J* = 1.3 Hz, 1H), 2.83 – 2.76 (m, 2H), 2.63 (t, *J* = 7.4 Hz, 2H), 2.03 (p, *J* = 7.5 Hz, 2H);

**<sup>13</sup>C NMR (101 MHz, CDCl<sub>3</sub>)** δ 179.6, 162.5 (d, <sup>1</sup>*J*<sub>C-F</sub> = 247.3 Hz), 146.5, 136.9 (d, <sup>4</sup>*J*<sub>C-F</sub> = 3.3 Hz), 127.8 (d, <sup>3</sup>*J*<sub>C-F</sub> = 7.8 Hz, 2C), 115.3 (d, <sup>2</sup>*J*<sub>C-F</sub> = 21.3 Hz, 2C), 113.2 (d, <sup>6</sup>*J*<sub>C-F</sub> = 1.4 Hz), 34.7, 33.3, 23.1;

**<sup>19</sup>F NMR (376 MHz, CDCl<sub>3</sub>)** δ -115.1 (tt, *J* = 8.8, 5.4 Hz).

**(E)-2-styrylbenzoic acid (1q):**

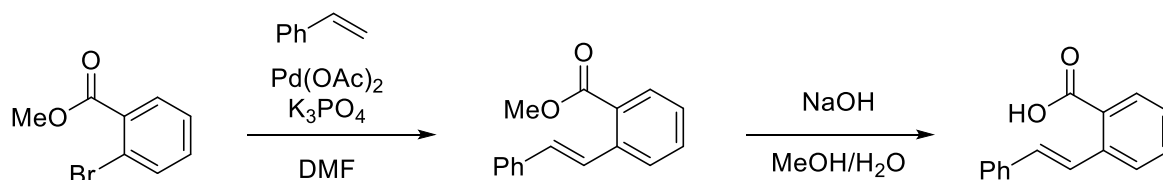

To a two-neck round-bottom flask equipped with a magnetic stir bar and a reflux condenser was added methyl 2-bromobenzoate (5 mmol, 1.08 g), K<sub>3</sub>PO<sub>4</sub> (1.5 equiv, 1.59 g), and Pd(OAc)<sub>2</sub>

(5 mol%, 56 mg). The flask was sealed by a septum, vacuumed and backfilled with nitrogen for three times. DMF (0.5 M, 10 mL) and styrene (2 equiv, 1.15 mL) were added by syringes. The resulting mixture was vigorously stirred at 80 °C overnight. Upon the completion of the reaction was confirmed by TLC, the reaction mixture was cooled to room temperature and filtered through celite. The resulting filtrate was diluted by adding water (50 mL). Organic components were extracted to diethyl ether (3 × 20 mL), washed with brine (20 mL), dried over Na<sub>2</sub>SO<sub>4</sub>, and concentrated under reduced pressure. The resulting crude product was used directly in the next step without further purification.

To a solution of the crude product obtained in the previous step in MeOH (10 mL) was added aqueous NaOH solution (5 M, 3 equiv, 3 mL). The resulting mixture was stirred at room temperature until the hydrolysis step was complete as confirming by TLC. After the reaction was complete, the reaction mixture was acidified to pH 2 by adding aqueous HCl (1 M). Organic components was extracted by ethyl acetate (3 × 20 mL), washed with brine (20 mL), dried over Na<sub>2</sub>SO<sub>4</sub>, and concentrated under reduced pressure. The residue was purified by silica gel column chromatography using hexanes/ethyl acetate/acid formic (4/1/0.04) as eluent to obtain the titled compound (1001 mg, 90% yield) as a white solid. Spectral data were in accordance with those previously reported.<sup>5</sup>

<sup>1</sup>H NMR (400 MHz, CDCl<sub>3</sub>) δ 8.18 – 8.06 (m, 2H), 7.82 – 7.75 (m, 1H), 7.64 – 7.56 (m, 3H), 7.40 (td, *J* = 7.4, 1.1 Hz, 3H), 7.35 – 7.29 (m, 1H), 7.07 (d, *J* = 16.2 Hz, 1H);

<sup>13</sup>C NMR (101 MHz, CDCl<sub>3</sub>) δ 173.0, 140.2, 137.4, 133.2, 131.9, 131.7, 128.7 (2C), 127.98, 127.6, 127.4, 127.30, 127.27, 127.0 (2C).

**1r**, **1s**, and **1t** were synthesized by Wittig olefination according to the following procedure:

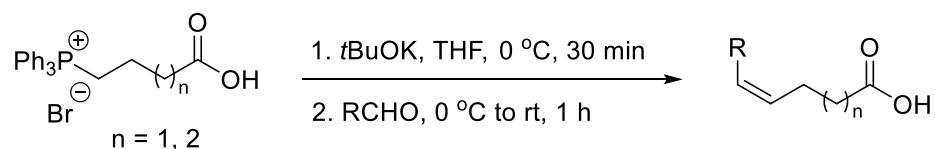

To an oven-dried round bottom flask equipped with a stir bar was added phosphonium salt (5 mmol) and dry THF (20 mL). The resulting suspension was cooled to 0 °C. Potassium *tert*-butoxide (2 equiv) was added in portion for 5 minutes. The mixture was warmed to room temperature and stirred for 30 min. The reaction was cooled again to 0 °C before adding aliphatic aldehyde (1.5 equiv) dropwise. After addition was complete, the reaction was warmed up to room temperature and stirred for 1 h. The reaction was then quenched with HCl (1M) to

pH = 2, extracted by Et<sub>2</sub>O (3 × 20 mL). The combined organic layer was washed with brine (20 mL), dried over anhydrous Na<sub>2</sub>SO<sub>4</sub>, and concentrated under reduced pressure to dryness. The alkenoic acid was purified over silica gel eluting with hexanes/ethyl acetate/formic acid (9/1/0.05) to afford alkenoic acid.

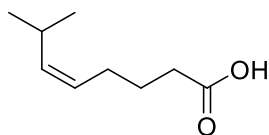

**(Z)-7-methyloct-5-enoic acid (1r):** Prepared according to the general procedure from (4-carboxybutyl)triphenylphosphonium bromide and isobutyraldehyde, yielding a mixture of *Z* (major) and *E* (minor) isomers. A fraction of pure *Z* isomer was characterized and used as a substrate for bromolactonization. Spectral data were in accordance with those previously reported.<sup>6</sup>

<sup>1</sup>H NMR (400 MHz, CDCl<sub>3</sub>) δ 5.31 – 5.16 (m, 2H), 2.66 – 2.52 (m, 1H), 2.39 (t, *J* = 7.5 Hz, 2H), 2.17 – 2.09 (m, 2H), 1.77 – 1.67 (m, 2H), 0.96 (d, *J* = 6.6 Hz, 6H);

<sup>13</sup>C NMR (101 MHz, CDCl<sub>3</sub>) δ 179.5, 138.8, 125.8, 33.3, 26.5, 26.5, 24.7, 23.2.

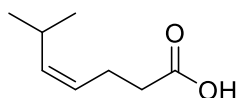

**(Z)-6-methylhept-4-enoic acid (1s):** Prepared according to the general procedure from (3-carboxypropyl)triphenylphosphonium bromide and isobutyraldehyde, yielding a mixture of *Z* (major) and *E* (minor) isomers. A fraction of pure *Z* isomer was characterized and used as a substrate for bromolactonization. Spectral data were in accordance with those previously reported.<sup>7</sup>

<sup>1</sup>H NMR (400 MHz, CDCl<sub>3</sub>) δ 5.32 – 5.19 (m, 2H), 2.70 – 2.57 (m, 1H), 2.47 – 2.36 (m, 4H), 0.97 (d, *J* = 6.6 Hz, 6H);

<sup>13</sup>C NMR (101 MHz, CDCl<sub>3</sub>) δ 179.0, 139.4, 124.5, 34.3, 26.5, 23.1, 22.6.

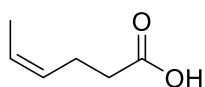

**(Z)-hex-4-enoic acid (1t):** Prepared according to the general procedure from (3-carboxypropyl)triphenylphosphonium bromide and acetaldehyde, yielding a mixture of *Z*

(major) and *E* (minor) isomers. A fraction with  $E/Z = 10/1$  was characterized and used as a substrate for bromolactonization. Spectral data were in accordance with those previously reported.<sup>8</sup>

**<sup>1</sup>H NMR (400 MHz, CDCl<sub>3</sub>)** δ 5.59 – 5.50 (m, 1.1 H), 5.50 – 5.45 (m, 0.1 H), 5.44 – 5.35 (m, 1H), 2.46 – 2.39 (m, 4.4H), 1.69 – 1.63 (m, 3.3H).

**<sup>13</sup>C NMR (101 MHz, CDCl<sub>3</sub>)** δ 179.6, 127.9, 125.7, 34.0, 22.2, 12.7; (Signals of *Z* isomer)

**<sup>13</sup>C NMR (101 MHz, CDCl<sub>3</sub>)** 128.8, 126.5, 34.1, 27.5, 17.9. (Signals of *E* isomer)

## General Procedure for the Regioselective *endo*-Bromolactonization (General Procedure A):

To a solution of unsaturated carboxylic acids (0.2 mmol) in HFIP or DCM/HFIP (0.1 M) in a screw-cap vial equipped with a stirrer bar was then added NBS (1.1 equiv, 39.2 mg). The reaction mixture was stirred at room temperature for 1 h. The solvent was then evaporated off and the residue was directly purified by flash column chromatography (silica gel, hexanes/ethyl acetate) to obtain the bromolactone product.

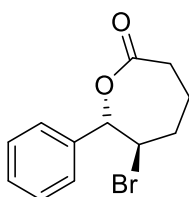

**6-bromo-7-phenyloxepan-2-one (2a):** Prepared according to the general procedure A from **1a** using NBS (1.1 equiv, 39.2 mg) and HFIP (0.1 M, 2 mL) at room temperature for 1 h. Purification by flash column chromatography eluting with hexanes/ethyl acetate (10/1) provided an inseparable mixture of **2a** and **3a** (53.6 mg, 86% yield, 12.5/1 ratio) as a white solid. Due to the low intensity of signals of the minor regioisomer, only signals of the major regioisomer were reported below.

**<sup>1</sup>H NMR (400 MHz, CDCl<sub>3</sub>)**  $\delta$  7.46 – 7.36 (m, 5H), 5.37 (d,  $J = 9.4$  Hz, 1H), 4.43 (dt,  $J = 9.3$ , 4.6 Hz, 1H), 2.98 (dt,  $J = 14.7$ , 8.7 Hz, 1H), 2.79 (ddd,  $J = 14.7$ , 7.8, 4.0 Hz, 1H), 2.55 – 2.42 (m, 1H), 2.28 (dddd,  $J = 15.4$ , 6.5, 5.2, 3.6 Hz, 1H), 2.15 (dddt,  $J = 14.5$ , 10.7, 7.9, 3.8 Hz, 1H), 1.97 – 1.87 (m, 1H);

**<sup>13</sup>C NMR (101 MHz, CDCl<sub>3</sub>)**  $\delta$  172.8, 137.5, 129.3, 128.7 (2C), 127.5 (2C), 84.2, 53.9, 34.7, 32.5, 17.7;

**ESI-HRMS:** calcd for C<sub>12</sub>H<sub>13</sub><sup>79</sup>BrO<sub>2</sub>Na<sup>+</sup>:  $m/z = 290.9991$ , found:  $m/z = 290.9995$ ;

**FTIR (neat):** 3032, 2922, 2852, 2647, 2104, 1712, 1450, 1344, 1265, 1218 cm<sup>-1</sup>.

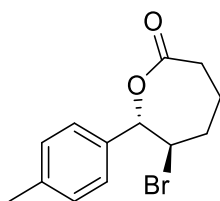

**6-bromo-7-(*p*-tolyl)oxepan-2-one (2b):** Prepared according to the general procedure A from **1b** using NBS (1.1 equiv, 39.2 mg) and HFIP (0.1 M, 2 mL) at room temperature for 1 h. Purification by flash column chromatography eluting with hexanes/ethyl acetate (10/1) provided **2b** (38.9 mg, 69% yield) as a pale-yellow solid.

**<sup>1</sup>H NMR (400 MHz, CDCl<sub>3</sub>)**  $\delta$  7.34 – 7.29 (m, 2H), 7.19 (d,  $J$  = 7.7 Hz, 2H), 5.34 (d,  $J$  = 9.5 Hz, 1H), 4.43 (dt,  $J$  = 9.3, 4.5 Hz, 1H), 2.98 (dt,  $J$  = 14.4, 8.7 Hz, 1H), 2.78 (ddd,  $J$  = 14.7, 7.9, 4.0 Hz, 1H), 2.48 (ddt,  $J$  = 14.9, 10.8, 3.9 Hz, 1H), 2.37 (s, 3H), 2.27 (dddd,  $J$  = 15.3, 6.4, 5.0, 3.5 Hz, 1H), 2.20 – 2.08 (m, 1H), 1.96 – 1.85 (m, 1H);

**<sup>13</sup>C NMR (101 MHz, CDCl<sub>3</sub>)**  $\delta$  172.9, 139.2, 134.6, 129.4 (2C), 127.4 (2C), 84.1, 54.1, 34.7, 32.5, 21.4, 17.7;

**ESI-HRMS:** calcd for C<sub>13</sub>H<sub>15</sub><sup>79</sup>BrO<sub>2</sub>Na<sup>+</sup>:  $m/z$  = 305.0148, found:  $m/z$  = 305.0148;

**FTIR (neat):** 2922, 2644, 2322, 1717, 1517, 1441, 1350, 1264 cm<sup>-1</sup>.

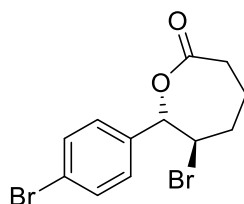

**6-bromo-7-(4-bromophenyl)oxepan-2-one (2c):** Prepared according to the general procedure A from **1c** using NBS (1.1 equiv, 39.2 mg) and HFIP (0.1 M, 2 mL) at room temperature for 1 h. Purification by flash column chromatography eluting with hexanes/ethyl acetate (10/1) provided **2c** (62.5 mg, 90% yield) as a white solid.

**<sup>1</sup>H NMR (400 MHz, CDCl<sub>3</sub>)**  $\delta$  7.55 – 7.50 (m, 2H), 7.34 – 7.29 (m, 2H), 5.32 (d,  $J$  = 9.5 Hz, 1H), 4.33 (dt,  $J$  = 9.5, 4.7 Hz, 1H), 2.95 (dt,  $J$  = 14.7, 8.7 Hz, 1H), 2.79 (ddd,  $J$  = 14.8, 7.7, 4.0 Hz, 1H), 2.48 (ddt,  $J$  = 14.6, 10.4, 3.9 Hz, 1H), 2.27 (dddd,  $J$  = 15.5, 6.6, 5.3, 3.5 Hz, 1H), 2.14 (tdd,  $J$  = 14.4, 7.8, 3.8 Hz, 1H), 1.97 – 1.85 (m, 1H);

$^{13}\text{C}$  NMR (101 MHz,  $\text{CDCl}_3$ )  $\delta$  172.5, 136.6, 131.8 (2C), 129.2 (2C), 123.3, 83.4, 53.6, 34.9, 32.5, 17.8;

ESI-HRMS: calcd for  $\text{C}_{12}\text{H}_{12}^{79}\text{Br}_2\text{O}_2\text{Na}^+$ :  $m/z = 368.9096$ , found:  $m/z = 368.9098$ ;

FTIR (neat): 3054, 2947, 1912, 1719, 1593, 1487, 1328, 1260, 1226  $\text{cm}^{-1}$ .

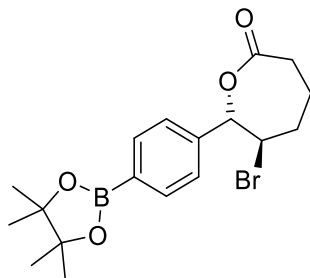

**6-bromo-7-(4-(4,4,5,5-tetramethyl-1,3,2-dioxaborolan-2-yl)phenyl)oxepan-2-one (2d):**

Prepared according to the general procedure A from **1d** using NBS (1.1 equiv, 39.2 mg) and HFIP (0.1 M, 2 mL) at room temperature for 1 h. Purification by flash column chromatography eluting with hexanes/ethyl acetate (10/1) provided **2d** (67 mg, 85% yield) as a white solid.

$^1\text{H}$  NMR (400 MHz,  $\text{CDCl}_3$ )  $\delta$  7.85 – 7.80 (m, 2H), 7.47 – 7.41 (m, 2H), 5.37 (d,  $J = 9.4$  Hz, 1H), 4.41 (dt,  $J = 9.3, 4.6$  Hz, 1H), 2.97 (dt,  $J = 14.7, 8.6$  Hz, 1H), 2.78 (ddd,  $J = 14.7, 7.8, 4.0$  Hz, 1H), 2.48 (ddt,  $J = 14.8, 10.7, 3.9$  Hz, 1H), 2.27 (dddd,  $J = 15.3, 6.5, 5.1, 3.5$  Hz, 1H), 2.15 (tdt,  $J = 14.7, 7.9, 3.8$  Hz, 1H), 1.96 – 1.85 (m, 1H), 1.34 (s, 12H);

$^{13}\text{C}$  NMR (101 MHz,  $\text{CDCl}_3$ )  $\delta$  140.2, 135.1 (2C), 126.8 (2C), 84.1 (2C), 53.7, 34.7, 32.5, 25.0 (4C), 17.7;

$^{11}\text{B}$  NMR (128 MHz,  $\text{CDCl}_3$ )  $\delta$  30.6;

ESI-HRMS: calcd for  $\text{C}_{18}\text{H}_{24}\text{B}^{79}\text{BrO}_4\text{Na}^+$ :  $m/z = 417.08465$ , found:  $m/z = 417.08416$ ;

FTIR (neat): 2974, 1728, 1611, 1515, 1442, 1356, 1267, 1215  $\text{cm}^{-1}$ .

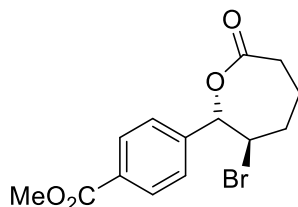

**Methyl 4-(3-bromo-7-oxooxepan-2-yl)benzoate (2e):** Prepared according to the general procedure A from **1e** using NBS (1.1 equiv, 39.2 mg) and HFIP (0.1 M, 2 mL) at room

temperature for 1 h. Purification by flash column chromatography eluting with hexanes/ethyl acetate (10/1) provided **2e** (33.3 mg, 51% yield) as a pale-pink solid.

**<sup>1</sup>H NMR (400 MHz, CDCl<sub>3</sub>)**  $\delta$  8.08 – 8.04 (m, 2H), 7.55 – 7.50 (m, 2H), 5.41 (d,  $J$  = 9.5 Hz, 1H), 4.39 – 4.33 (m, 1H), 3.92 (s, 3H), 2.97 (dt,  $J$  = 14.8, 8.4 Hz, 1H), 2.81 (ddd,  $J$  = 14.8, 7.5, 4.1 Hz, 1H), 2.56 – 2.46 (m, 1H), 2.28 (dddd,  $J$  = 15.6, 6.9, 5.5, 3.6 Hz, 1H), 2.15 (tdd,  $J$  = 14.3, 7.9, 3.8 Hz, 1H), 1.92 (dddd,  $J$  = 16.4, 14.5, 7.3, 3.7 Hz, 1H);

**<sup>13</sup>C NMR (101 MHz, CDCl<sub>3</sub>)**  $\delta$  172.5, 166.6, 142.3, 131.0, 130.0 (2C), 127.6 (2C), 83.5, 53.3, 52.4, 35.1, 32.5, 18.0;

**ESI-HRMS:** calcd for C<sub>14</sub>H<sub>15</sub><sup>79</sup>BrO<sub>4</sub>Na<sup>+</sup>:  $m/z$  = 349.0046, found:  $m/z$  = 349.0047;

**FTIR (neat):** 2952, 2916, 2084, 1710, 1612, 1437, 1346, 1279, 1226 cm<sup>-1</sup>.

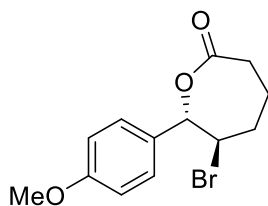

**6-bromo-7-(4-methoxyphenyl)oxepan-2-one (2f):** Prepared according to the general procedure A from **1f** using NBS (1.1 equiv, 39.2 mg) and HFIP/DCM (1/4, 0.1 M, 2 mL) at room temperature for 1 h. Purification by flash column chromatography eluting with hexanes/ethyl acetate (10/1) provided **2f** as a mixture of diastereomers (47.1 mg, 79% yield, 17/1 ratio) as a white solid. Due to the low intensity of signals of the minor diastereomer, only signals of the major diastereomer were reported below.

**<sup>1</sup>H NMR (400 MHz, CDCl<sub>3</sub>)**  $\delta$  7.37 – 7.32 (m, 2H), 6.93 – 6.88 (m, 2H), 5.32 (d,  $J$  = 9.5 Hz, 1H), 4.42 (dt,  $J$  = 9.3, 4.5 Hz, 1H), 3.82 (s, 3H), 2.97 (dt,  $J$  = 14.7, 8.7 Hz, 1H), 2.78 (ddd,  $J$  = 14.8, 8.0, 4.0 Hz, 1H), 2.47 (ddt,  $J$  = 14.9, 10.7, 3.9 Hz, 1H), 2.27 (dddd,  $J$  = 15.4, 6.5, 5.0, 3.5 Hz, 1H), 2.14 (tdd,  $J$  = 14.5, 8.0, 3.7 Hz, 1H), 1.96 – 1.85 (m, 1H);

**<sup>13</sup>C NMR (101 MHz, CDCl<sub>3</sub>)**  $\delta$  172.9, 160.2, 129.7, 128.8 (2C), 114.0 (2C), 83.9, 55.4, 54.4, 34.7, 32.5, 17.6;

**ESI-HRMS:** calcd for C<sub>13</sub>H<sub>15</sub><sup>79</sup>BrO<sub>3</sub>Na<sup>+</sup>:  $m/z$  = 321.0097, found:  $m/z$  = 321.0098;

**FTIR (neat):** 2940, 2650, 1894, 1716, 1611, 1511, 1440, 1303, 1247 cm<sup>-1</sup>.



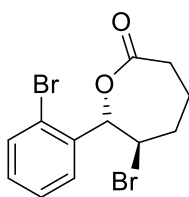

**6-bromo-7-(2-bromophenyl)oxepan-2-one (2g):** Prepared according to the general procedure A from **1g** using NBS (1.1 equiv, 39.2 mg) and HFIP (0.1 M, 2 mL) at room temperature for 1 h. Purification by flash column chromatography eluting with hexanes/ethyl acetate (10/1) provided **2g** (54.8 mg, 79% yield) as a pale-yellow liquid.

**<sup>1</sup>H NMR (400 MHz, CDCl<sub>3</sub>)**  $\delta$  7.60 (dd,  $J = 8.1, 1.3$  Hz, 1H), 7.48 (dd,  $J = 7.8, 1.7$  Hz, 1H), 7.38 (td,  $J = 7.6, 1.3$  Hz, 1H), 7.23 (ddd,  $J = 8.1, 7.3, 1.7$  Hz, 1H), 5.94 (d,  $J = 9.8$  Hz, 1H), 4.51 (ddd,  $J = 10.2, 6.4, 4.2$  Hz, 1H), 3.03 (ddd,  $J = 15.0, 9.2, 7.4$  Hz, 1H), 2.83 (ddd,  $J = 15.0, 6.8, 4.6$  Hz, 1H), 2.57 (ddt,  $J = 15.2, 9.4, 3.8$  Hz, 1H), 2.34 (dddd,  $J = 15.0, 8.2, 6.4, 3.5$  Hz, 1H), 2.21 – 2.10 (m, 1H), 1.92 (dddd,  $J = 14.9, 9.9, 8.2, 6.8, 3.4$  Hz, 1H);

**<sup>13</sup>C NMR (101 MHz, CDCl<sub>3</sub>)**  $\delta$  172.8, 136.9, 133.0, 130.7, 128.7, 128.2, 124.8, 81.7, 51.5, 36.2, 32.7, 18.8;

**ESI-HRMS:** calcd for C<sub>12</sub>H<sub>12</sub><sup>79</sup>Br<sub>2</sub>O<sub>2</sub>Na<sup>+</sup>:  $m/z = 368.9096$ , found:  $m/z = 368.9099$ ;

**FTIR (neat):** 3439, 3053, 2922, 2115, 1929, 1723, 1590, 1463, 1438, 1346, 1257, 1209 cm<sup>-1</sup>.

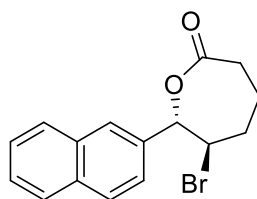

**6-bromo-7-(naphthalen-2-yl)oxepan-2-one (2h):** Prepared according to the general procedure A from **1h** using NBS (1.1 equiv, 39.2 mg) and HFIP/DCM (1/4, 0.1 M, 2 mL) at room temperature for 1 h. Purification by flash column chromatography eluting with hexanes/ethyl acetate (10/1) provided **2h** (50.9 mg, 80% yield) as a pale-yellow solid.

**<sup>1</sup>H NMR (400 MHz, CDCl<sub>3</sub>)**  $\delta$  7.91 – 7.84 (m, 4H), 7.58 – 7.48 (m, 3H), 5.54 (d,  $J = 9.4$  Hz, 1H), 4.53 (dt,  $J = 9.4, 4.6$  Hz, 1H), 3.03 (dt,  $J = 14.4, 8.6$  Hz, 1H), 2.82 (ddd,  $J = 14.7, 7.7, 4.0$

Hz, 1H), 2.59 – 2.49 (m, 1H), 2.31 (dddd,  $J = 15.4, 6.6, 5.2, 3.6$  Hz, 1H), 2.24 – 2.13 (m, 1H), 2.00 – 1.89 (m, 1H);

$^{13}\text{C}$  NMR (101 MHz,  $\text{CDCl}_3$ )  $\delta$  172.8, 134.8, 133.7, 133.0, 128.7, 128.4, 127.9, 127.4, 126.8, 126.6, 124.4, 84.4, 53.8, 34.9, 32.6, 17.9;

ESI-HRMS: calcd for  $\text{C}_{16}\text{H}_{15}^{79}\text{BrO}_2\text{Na}^+$ :  $m/z = 341.0148$ , found:  $m/z = 341.0148$ ;

FTIR (neat): 3053, 2944, 2322, 1723, 1509, 1443, 1344, 1257  $\text{cm}^{-1}$ .

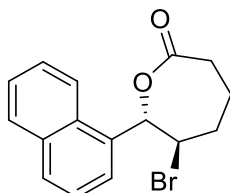

**6-bromo-7-(naphthalen-1-yl)oxepan-2-one (2i):** Prepared according to the general procedure A from **1i** using NBS (1.1 equiv, 39.2 mg) and HFIP/DCM (1/4, 0.1 M, 2 mL) at room temperature for 1 h. Purification by flash column chromatography eluting with hexanes/ethyl acetate (10/1) provided **2i** (50.9 mg, 80% yield) as a pale-yellow solid.

$^1\text{H}$  NMR (400 MHz,  $\text{CDCl}_3$ )  $\delta$  8.13 (d,  $J = 8.5$  Hz, 1H), 7.92 – 7.87 (m, 2H), 7.62 – 7.46 (m, 4H), 6.02 (d,  $J = 9.5$  Hz, 1H), 4.85 (dt,  $J = 9.2, 4.4$  Hz, 1H), 3.15 (dt,  $J = 14.7, 8.7$  Hz, 1H), 2.88 (ddd,  $J = 14.7, 8.1, 3.4$  Hz, 1H), 2.62 (ddt,  $J = 14.9, 10.9, 3.9$  Hz, 1H), 2.37 (dddd,  $J = 15.2, 6.1, 5.0, 3.6$  Hz, 1H), 2.26 (dddt,  $J = 14.5, 10.8, 8.8, 3.6$  Hz, 1H), 2.08 – 1.97 (m, 1H);

$^{13}\text{C}$  NMR (101 MHz,  $\text{CDCl}_3$ )  $\delta$  172.8, 134.2, 132.8, 130.8, 130.3, 129.3, 127.2, 126.8, 126.0, 125.1, 123.9, 83.0, 53.3, 34.4, 32.3, 17.7;

ESI-HRMS: calcd for  $\text{C}_{16}\text{H}_{15}^{79}\text{BrO}_2\text{Na}^+$ :  $m/z = 341.01476$ , found:  $m/z = 341.01477$ ;

FTIR (neat): 3041, 2937, 2875, 2050, 1717, 1596, 1510, 1461, 1344, 1265, 1203  $\text{cm}^{-1}$ .

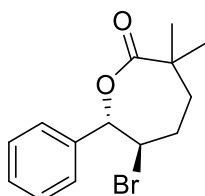

**6-bromo-3,3-dimethyl-7-phenyloxepan-2-one (2j):** Prepared according to the general procedure A from **1j** using NBS (1.1 equiv, 39.2 mg) and HFIP (0.1 M, 2 mL) at room

temperature for 1 h. Purification by flash column chromatography eluting with hexanes/ethyl acetate (10/1) provided **2j** (45 mg, 76% yield) as a white solid.

**<sup>1</sup>H NMR (400 MHz, CDCl<sub>3</sub>)**  $\delta$  7.47 – 7.43 (m, 2H), 7.42 – 7.35 (m, 3H), 5.42 (d,  $J$  = 10.2 Hz, 1H), 4.35 (ddd,  $J$  = 10.3, 6.0, 4.5 Hz, 1H), 2.42 (dddd,  $J$  = 16.0, 9.8, 4.5, 1.7 Hz, 1H), 2.33 – 2.24 (m, 1H), 1.94 (ddd,  $J$  = 14.9, 9.8, 1.7 Hz, 1H), 1.84 (ddd,  $J$  = 14.9, 9.0, 1.8 Hz, 1H), 1.41 (s, 3H), 1.38 (s, 3H);

**<sup>13</sup>C NMR (101 MHz, CDCl<sub>3</sub>)**  $\delta$  178.6, 137.2, 129.3, 128.6 (2C), 127.8 (2C), 83.3, 54.4, 44.5, 35.2, 33.8, 29.6, 26.0;

**ESI-HRMS:** calcd for C<sub>14</sub>H<sub>17</sub><sup>79</sup>BrO<sub>2</sub>Na<sup>+</sup>:  $m/z$  = 319.0304, found:  $m/z$  = 319.0308;

**FTIR (neat):** 3036, 2970, 2931, 1716, 1458, 1390, 1293, 1249 cm<sup>-1</sup>.

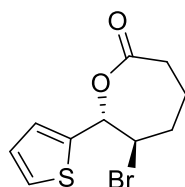

**6-bromo-7-(thiophen-2-yl)oxepan-2-one (2k):** Prepared according to the general procedure A from **1k** using NBS (1.1 equiv, 39.2 mg) and HFIP/DCM (1/99, 0.1 M, 2 mL) at room temperature for 1 h. Purification by flash column chromatography eluting with hexanes/ethyl acetate (10/1) provided **2k** as a mixture of diastereomers (11.5 mg, 21% yield, 17/1 ratio) as a colourless liquid. Due to the low intensity of signals of the minor diastereomer, only signals of the major diastereomer were reported below.

**<sup>1</sup>H NMR (400 MHz, CDCl<sub>3</sub>)**  $\delta$  7.35 (dd,  $J$  = 5.1, 1.2 Hz, 1H), 7.18 (ddd,  $J$  = 3.5, 1.2, 0.6 Hz, 1H), 7.00 (dd,  $J$  = 5.1, 3.6 Hz, 1H), 5.69 (d,  $J$  = 9.2 Hz, 1H), 4.55 – 4.49 (m, 1H), 2.96 (dt,  $J$  = 14.2, 8.7 Hz, 1H), 2.77 (ddd,  $J$  = 14.8, 8.3, 4.0 Hz, 1H), 2.45 (ddt,  $J$  = 15.5, 11.5, 3.9 Hz, 1H), 2.27 (dddd,  $J$  = 15.6, 5.8, 4.4, 3.5 Hz, 1H), 2.14 (dddd,  $J$  = 15.1, 8.8, 7.4, 3.7 Hz, 1H), 1.96 – 1.85 (m, 1H);

**<sup>13</sup>C NMR (101 MHz, CDCl<sub>3</sub>)**  $\delta$  172.1, 139.8, 127.2, 126.7, 126.5, 79.8, 54.2, 33.9, 32.4, 17.1;

**ESI-HRMS:** calcd for C<sub>10</sub>H<sub>11</sub><sup>79</sup>BrO<sub>2</sub>SNa<sup>+</sup>:  $m/z$  = 296.9555, found:  $m/z$  = 296.9558;

**FTIR (neat):** 3434, 3140, 2923, 1717, 1440, 1350, 1262 cm<sup>-1</sup>.

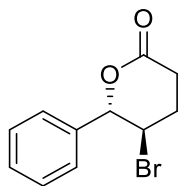

**5-bromo-6-phenyltetrahydro-2H-pyran-2-one (2l):** Prepared according to the general procedure A from **1l** using NBS (1.1 equiv, 39.2 mg) and HFIP (0.1 M, 2 mL) at room temperature for 1 h. Purification by flash column chromatography eluting with hexanes/ethyl acetate (10/1) provided **2l** (39.1 mg, 77% yield) as a white solid. Spectral data were in accordance with those previously reported.<sup>9</sup>

**<sup>1</sup>H NMR (400 MHz, CDCl<sub>3</sub>)**  $\delta$  7.44 – 7.31 (m, 5H), 5.56 (d,  $J$  = 6.3 Hz, 1H), 4.39 (td,  $J$  = 6.6, 4.3 Hz, 1H), 3.01 – 2.91 (m, 1H), 2.76 – 2.67 (m, 1H), 2.42 (dddd,  $J$  = 14.8, 8.5, 6.5, 4.3 Hz, 1H), 2.32 – 2.22 (m, 1H);

**<sup>13</sup>C NMR (101 MHz, CDCl<sub>3</sub>)**  $\delta$  169.1, 137.4, 129.2, 129.0 (2C), 126.5 (2C), 85.8, 47.3, 28.5, 27.8.

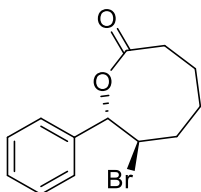

**7-bromo-8-phenyloxocan-2-one (2m):** Prepared according to the general procedure A from **1m** using NBS (1.1 equiv, 39.2 mg) and HFIP (0.1 M, 2 mL) at room temperature for 1 h. Purification by flash column chromatography eluting with hexanes/ethyl acetate (10/1) provided **2m** (16.3 mg, 23% yield) as a white solid.

**<sup>1</sup>H NMR (400 MHz, CDCl<sub>3</sub>)**  $\delta$  7.48 (dd,  $J$  = 7.9, 1.7 Hz, 2H), 7.41 – 7.36 (m, 3H), 5.78 (d,  $J$  = 10.5 Hz, 1H), 4.30 (ddd,  $J$  = 10.8, 8.4, 2.7 Hz, 1H), 2.57 – 2.39 (m, 3H), 2.10 – 1.90 (m, 4H), 1.86 – 1.79 (m, 1H);

**<sup>13</sup>C NMR (101 MHz, CDCl<sub>3</sub>)**  $\delta$  175.1, 137.2, 129.2, 128.6 (2C), 128.0 (2C), 82.7, 56.4, 36.0, 33.8, 29.0, 25.5;

**ESI-HRMS:** calcd for C<sub>13</sub>H<sub>15</sub><sup>79</sup>BrO<sub>2</sub>Na<sup>+</sup>:  $m/z$  = 305.0148, found:  $m/z$  = 305.0148;

**FTIR (neat):** 3034, 2930, 2858, 1893, 1705, 1452, 1349, 1267  $\text{cm}^{-1}$ .

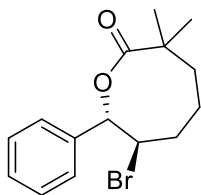

**7-bromo-3,3-dimethyl-8-phenyloxocan-2-one (2n):** Prepared according to the general procedure A from **1n** using NBS (1.1 equiv, 39.2 mg) and HFIP (0.1 M, 2 mL) at room temperature for 1 h. Purification by flash column chromatography eluting with hexanes/ethyl acetate (10/1) provided **2n** (18.0 mg, 29% yield) as a white solid.

**$^1\text{H}$  NMR (400 MHz,  $\text{CDCl}_3$ )**  $\delta$  7.51 – 7.47 (m, 2H), 7.42 – 7.33 (m, 3H), 6.04 (d,  $J$  = 10.2 Hz, 1H), 4.13 (ddd,  $J$  = 11.4, 10.3, 2.4 Hz, 1H), 2.61 – 2.50 (m, 1H), 2.04 – 1.93 (m, 1H), 1.86 – 1.74 (m, 3H), 1.66 (ddd,  $J$  = 14.1, 11.5, 2.3 Hz, 1H), 1.23 (d,  $J$  = 17.0 Hz, 6H);

**$^{13}\text{C}$  NMR (101 MHz,  $\text{CDCl}_3$ )**  $\delta$  178.3, 137.5, 129.0, 128.6 (2C), 128.0 (2C), 82.3, 56.6, 46.4, 41.7, 37.9, 25.6, 25.0, 22.4;

**ESI-HRMS:** calcd for  $\text{C}_{15}\text{H}_{19}^{79}\text{BrO}_2\text{H}^+$ :  $m/z$  = 311.0641, found:  $m/z$  = 311.0643;

**FTIR (neat):** 2966, 2923, 2669, 2083, 1721, 1605, 1452, 1391, 1345, 1303, 1210  $\text{cm}^{-1}$ .

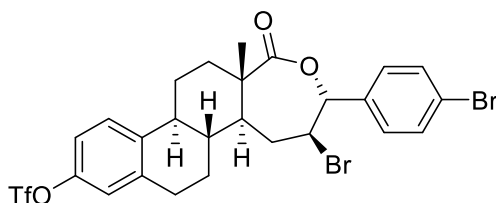

**(5a*S*,5b*R*,11b*S*,13a*S*)-4-bromo-3-(4-bromophenyl)-13a-methyl-1-oxo-1,3,4,5,5a,5b,6,7,11b,12,13,13a-dodecahydrophenanthro[2,1-*c*]oxepin-9-yl**

**trifluoromethanesulfonate (2o):** Prepared according to the general procedure A from **1o** using NBS (1.1 equiv, 39.2 mg) and HFIP (0.1 M, 2 mL) at room temperature for 1 h. Purification by flash column chromatography eluting with hexanes/ethyl acetate (10/1) provided **2o** as a mixture of diastereomers (116.9 mg, 88% yield, 1/1 ratio) as a white solid.

**$^1\text{H}$  NMR (400 MHz,  $\text{CDCl}_3$ )**  $\delta$  7.55 – 7.50 (m, 2H), 7.33 (ddd,  $J$  = 15.3, 8.6, 6.0 Hz, 3H), 7.07 (dd,  $J$  = 8.6, 2.8 Hz, 1H), 7.01 (d,  $J$  = 2.7 Hz, 1H), 5.43 (d,  $J$  = 8.8 Hz, 0.5H), 5.29 (d,  $J$  = 10.3 Hz, 0.5H), 4.46 (dt,  $J$  = 8.8, 5.2 Hz, 0.5H), 4.22 (ddd,  $J$  = 12.0, 10.3, 3.6 Hz, 0.5H), 3.03 – 2.79

(m, 2.5H), 2.56 – 2.34 (m, 3H), 2.30 – 1.91 (m, 4.5H), 1.66 – 1.40 (m, 3H, overlapping with H<sub>2</sub>O signal), 1.38 (s, 1.5H), 1.36 (s, 1.5H);

**<sup>13</sup>C NMR (101 MHz, CDCl<sub>3</sub>)**  $\delta$  180.4, 179.7, 147.9, 147.9, 140.4, 140.3, 139.34, 139.29, 138.0, 137.9, 131.8, 131.7, 129.2, 128.7, 127.1, 127.0, 123.0, 121.1, 121.0, 118.9 (q, <sup>1</sup>J<sub>C-F</sub> = 321.9 Hz), 118.7, 118.6, 85.4, 83.3, 77.4, 54.1, 53.3, 47.9, 47.4, 47.0, 43.19, 43.15, 41.8, 39.1, 39.0, 38.5, 36.6, 36.4, 35.3, 29.7, 29.6, 27.1, 26.6, 25.3, 25.0, 17.8, 16.3;

**<sup>19</sup>F NMR (376 MHz, CDCl<sub>3</sub>)**  $\delta$  -72.9 (d, *J* = 2.6 Hz);

**ESI-HRMS:** calcd for C<sub>26</sub>H<sub>25</sub><sup>79</sup>Br<sub>2</sub>F<sub>3</sub>O<sub>5</sub>SH<sup>+</sup>: *m/z* = 664.9814, found: *m/z* = 664.9809;

**FTIR (neat):** 2932, 1721, 1593, 1489, 1416, 1205 cm<sup>-1</sup>.

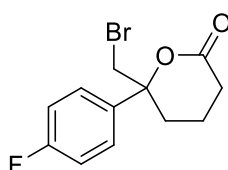

**6-(bromomethyl)-6-(4-fluorophenyl)tetrahydro-2H-pyran-2-one (3p):** Prepared according to the general procedure A from **1p** using NBS (1.1 equiv, 39.2 mg) and HFIP (0.1 M, 2 mL) at room temperature for 1 h. Purification by flash column chromatography eluting with hexanes/ethyl acetate (5/1) provided **3p** (38.9 mg, 95% yield) as a pale-pink solid. Spectral data were in accordance with those previously reported.<sup>10</sup>

**<sup>1</sup>H NMR (400 MHz, CDCl<sub>3</sub>)**  $\delta$  7.41 – 7.35 (m, 2H), 7.13 – 7.06 (m, 2H), 3.65 (d, *J* = 11.1 Hz, 1H), 3.60 (d, *J* = 11.1 Hz, 1H), 2.56 – 2.31 (m, 4H), 1.90 – 1.81 (m, 1H), 1.59 (tddd, *J* = 11.9, 10.0, 7.2, 4.7 Hz, 1H);

**<sup>13</sup>C NMR (101 MHz, CDCl<sub>3</sub>)**  $\delta$  170.2, 162.7 (d, <sup>1</sup>J<sub>C-F</sub> = 249.7 Hz), 136.2 (d, <sup>4</sup>J<sub>C-F</sub> = 3.2 Hz, 2C), 127.5 (d, <sup>3</sup>J<sub>C-F</sub> = 8.3 Hz, 2C), 116.1 (d, <sup>2</sup>J<sub>C-F</sub> = 21.7 Hz), 84.9, 41.5 (d, *J* = 1.41 Hz), 30.2, 29.2, 16.4;

**<sup>19</sup>F NMR (376 MHz, CDCl<sub>3</sub>)**  $\delta$  -113.2 (tt, *J* = 8.2, 5.1 Hz).

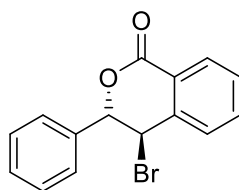

**4-bromo-3-phenylisochroman-1-one (2q):** Prepared according to the general procedure A from **1q** using NBS (1.1 equiv, 39.2 mg) and HFIP (0.1 M, 2 mL) at room temperature for 1 h. Purification by flash column chromatography eluting with hexanes/ethyl acetate (10/1) provided **2q** (46.1 mg, 76% yield) as a pale-yellow solid. Spectral data were in accordance with those previously reported.<sup>11</sup>

**<sup>1</sup>H NMR (400 MHz, CDCl<sub>3</sub>)**  $\delta$  8.16 (dd,  $J = 7.8, 1.4$  Hz, 1H), 7.60 (td,  $J = 7.6, 1.4$  Hz, 1H), 7.51 – 7.45 (m, 2H), 7.34 – 7.30 (m, 3H), 7.30 – 7.26 (m, 2H), 5.91 (d,  $J = 4.6$  Hz, 1H), 5.56 (d,  $J = 4.6$  Hz, 1H);

**<sup>13</sup>C NMR (101 MHz, CDCl<sub>3</sub>)**  $\delta$  163.3, 137.9, 136.5, 134.8, 130.6, 130.0, 129.1, 129.0 (2C), 128.5, 126.6 (2C), 124.3, 84.3, 46.3.

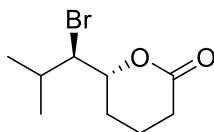

**6-(1-bromo-2-methylpropyl)tetrahydro-2H-pyran-2-one (3r):** Prepared according to the general procedure A from **1r** using NBS (1.1 equiv, 39.2 mg) and HFIP (0.1 M, 2 mL) at room temperature for 1 h. Purification by flash column chromatography eluting with hexanes/ethyl acetate (4/1) provided **3r** (44.5 mg, 95% yield) as a colorless oil.

**<sup>1</sup>H NMR (400 MHz, CDCl<sub>3</sub>)**  $\delta$  4.47 (ddd,  $J = 9.2, 4.8, 3.3$  Hz, 1H), 3.79 (dd,  $J = 6.8, 3.4$  Hz, 1H), 2.67 – 2.57 (m, 1H), 2.53 – 2.42 (m, 1H), 2.18 (dq,  $J = 13.3, 6.7$  Hz, 1H), 2.02 – 1.82 (m, 4H), 1.09 (dd,  $J = 11.0, 6.6$  Hz, 6H);

**<sup>13</sup>C NMR (101 MHz, CDCl<sub>3</sub>)**  $\delta$  170.7, 80.1, 66.0, 32.3, 29.8, 27.3, 21.3, 21.0, 18.6;

**ESI-HRMS:** calcd for C<sub>9</sub>H<sub>15</sub><sup>79</sup>BrO<sub>2</sub>Na<sup>+</sup>:  $m/z = 257.0148$ , found:  $m/z = 257.0148$ ;

**FTIR (neat):** 2963, 2876, 2247. 1732, 1461, 1367, 1343, 1235 cm<sup>-1</sup>.

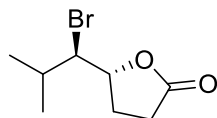

**5-(1-bromo-2-methylpropyl)dihydrofuran-2(3H)-one (3s):** Prepared according to the general procedure A from **1s** using NBS (1.1 equiv, 39.2 mg) and HFIP (0.1 M, 2 mL) at room temperature for 1 h. Purification by flash column chromatography eluting with hexanes/ethyl acetate (4/1) provided **3s** (41.1 mg, 93% yield) as a colorless oil. Spectral data were in accordance with those previously reported.<sup>12</sup>

**<sup>1</sup>H NMR (400 MHz, CDCl<sub>3</sub>)**  $\delta$  4.72 (ddd,  $J = 7.7, 6.6, 3.5$  Hz, 1H), 3.86 (dd,  $J = 6.1, 3.5$  Hz, 1H), 2.71 (ddd,  $J = 17.9, 10.5, 5.1$  Hz, 1H), 2.58 – 2.47 (m, 1H), 2.37 (dddd,  $J = 12.9, 10.4, 7.7, 5.1$  Hz, 1H), 2.21 – 2.06 (m, 2H), 1.09 (dd,  $J = 6.7, 1.2$  Hz, 6H);

**<sup>13</sup>C NMR (101 MHz, CDCl<sub>3</sub>)**  $\delta$  176.5, 80.0, 67.0, 33.0, 28.4, 26.8, 21.3, 20.4.

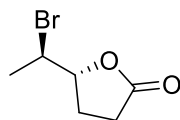

**1-(bromoethyl)dihydrofuran-2(3H)-one (3t):** Prepared according to the general procedure A from **1t** using NBS (1.1 equiv, 39.2 mg) and HFIP (0.1 M, 2 mL) at room temperature for 1 h. Purification by flash column chromatography eluting with hexanes/ethyl acetate (3/1) provided **3t** (33.6 mg, 87% yield) as a colorless oil. Spectral data were in accordance with those previously reported.<sup>13</sup>

**<sup>1</sup>H NMR (400 MHz, CDCl<sub>3</sub>)**  $\delta$  4.61 (ddd,  $J = 7.8, 6.5, 3.7$  Hz, 1H), 4.22 (qd,  $J = 6.9, 3.7$  Hz, 1H), 2.71 (ddd,  $J = 18.0, 10.4, 5.5$  Hz, 1H), 2.58 (ddd,  $J = 18.0, 10.4, 7.9$  Hz, 1H), 2.41 (dddd,  $J = 13.3, 10.4, 7.8, 5.4$  Hz, 1H), 2.18 (dddd,  $J = 13.2, 10.5, 7.8, 6.4$  Hz, 1H), 1.77 (d,  $J = 6.8$  Hz, 3H);

**<sup>13</sup>C NMR (101 MHz, CDCl<sub>3</sub>)**  $\delta$  176.4, 81.8, 50.2, 28.4, 25.0, 21.2.



## General Procedure for the Regioselective *exo*-Bromolactonization (General Procedure B):

To a solution of unsaturated carboxylic acid (0.2 mmol) in HFIP or DCM/HFIP (0.1 M) in a screw-cap vial equipped with a stirrer bar was added NBS (1.1 equiv, 39.2 mg). After stirring the resulting at room temperature for 2 minutes or 1 h, catalytic amount of *p*TSA or triflic acid was then added. The reaction mixture was stirred at room temperature for 1 h. The solvent was then evaporated off and the residue was directly purified by flash column chromatography (silica gel, hexanes/ethyl acetate) to obtain the product.

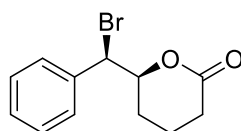

**6-(bromo(phenyl)methyl)tetrahydro-2*H*-pyran-2-one (3a):** Prepared according to the general procedure B from **1a** using NBS (1.1 equiv, 39.2 mg) in HFIP (0.1 M, 2 mL). After 2 minutes, the reaction was added *p*TSA (5 mol%, 1.7 mg) and further stirred for 1 h. Purification by flash column chromatography eluting with hexanes/ethyl acetate (5/1) provided **3a** (45 mg, 84% yield) as a colourless liquid.

**<sup>1</sup>H NMR (400 MHz, CDCl<sub>3</sub>)**  $\delta$  7.45 – 7.41 (m, 2H), 7.38 – 7.28 (m, 3H), 5.06 (d,  $J$  = 5.8 Hz, 1H), 4.64 (ddd,  $J$  = 10.5, 5.8, 3.4 Hz, 1H), 2.60 (dddd,  $J$  = 17.9, 6.5, 4.5, 1.3 Hz, 1H), 2.43 (ddd,  $J$  = 17.8, 9.7, 7.0 Hz, 1H), 2.25 – 2.18 (m, 1H), 2.00 – 1.91 (m, 1H), 1.88 – 1.70 (m, 2H);  
**<sup>13</sup>C NMR (101 MHz, CDCl<sub>3</sub>)**  $\delta$  170.4, 137.2, 129.0, 128.8 (2C), 128.8 (2C), 82.4, 55.9, 29.6, 25.5, 18.3;

**ESI-HRMS:** calcd for C<sub>12</sub>H<sub>13</sub><sup>79</sup>BrO<sub>2</sub>H<sup>+</sup>:  $m/z$  = 269.0172, found:  $m/z$  = 269.0171;

**FTIR (neat):** 3033, 2961, 2110, 1713, 1497, 1452, 1233 cm<sup>-1</sup>.

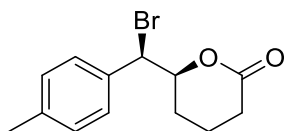

**6-(bromo(*p*-tolyl)methyl)tetrahydro-2*H*-pyran-2-one (3b):** Prepared according to the general procedure B from **1b** using NBS (1.1 equiv, 39.2 mg) in HFIP (0.1 M, 2 mL). After 1 h, the reaction was added *p*TSA (5 mol%, 1.7 mg) and further stirred for 1 h. Purification by flash column chromatography eluting with hexanes/ethyl acetate (5/1) provided **3b** (27.6 mg, 49% yield) as a yellow liquid.

**<sup>1</sup>H NMR (400 MHz, CDCl<sub>3</sub>)**  $\delta$  7.34 – 7.29 (m, 2H), 7.17 – 7.13 (m, 2H), 5.03 (d,  $J$  = 5.7 Hz, 1H), 4.63 (ddd,  $J$  = 10.5, 5.8, 3.4 Hz, 1H), 2.60 (dddd,  $J$  = 17.9, 6.5, 4.5, 1.3 Hz, 1H), 2.47 – 2.37 (m, 1H), 2.34 (s, 3H), 2.25 – 2.18 (m, 1H), 1.99 – 1.90 (m, 1H), 1.88 – 1.70 (m, 2H);

**<sup>13</sup>C NMR (101 MHz, CDCl<sub>3</sub>)**  $\delta$  170.4, 139.0, 134.3, 129.5 (2C), 128.6 (2C), 82.5, 55.9, 29.6, 25.5, 21.3, 18.3;

**ESI-HRMS:** calcd for C<sub>13</sub>H<sub>15</sub><sup>79</sup>BrO<sub>2</sub>H<sup>+</sup>:  $m/z$  = 283.0328, found:  $m/z$  = 283.0328;

**FTIR (neat):** 3167, 3022, 2958, 2629, 2113, 1735, 1672, 1510, 1456, 1410, 1338, 1284, 1243 cm<sup>-1</sup>.

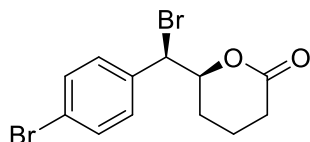

**6-(Bromo(4-bromophenyl)methyl)tetrahydro-2*H*-pyran-2-one (3c):** Prepared according to the general procedure B from **1c** using NBS (1.1 equiv, 39.2 mg) in HFIP (0.1 M, 2 mL) at room temperature. After 2 minutes, the reaction was added *p*TSA (5 mol%, 1.7 mg) and further stirred for 1 h. Purification by flash column chromatography eluting with hexanes/ethyl acetate (5/1) provided **3c** (61.6 mg, 89% yield) as a pale-yellow liquid. Spectral data were in accordance with those previously reported.<sup>14</sup>

**<sup>1</sup>H NMR (400 MHz, CDCl<sub>3</sub>)**  $\delta$  7.51 – 7.45 (m, 2H), 7.33 – 7.29 (m, 2H), 4.95 (d,  $J$  = 6.2 Hz, 1H), 4.63 (ddd,  $J$  = 10.9, 6.2, 3.4 Hz, 1H), 2.60 (dddd,  $J$  = 17.9, 6.6, 4.5, 1.3 Hz, 1H), 2.43 (ddd,  $J$  = 17.8, 9.8, 7.1 Hz, 1H), 2.29 – 2.20 (m, 1H), 2.00 – 1.93 (m, 1H), 1.89 – 1.80 (m, 1H), 1.67 (dtd,  $J$  = 13.8, 11.2, 5.2 Hz, 1H);

$^{13}\text{C}$  NMR (101 MHz,  $\text{CDCl}_3$ )  $\delta$  170.1, 136.4, 132.0 (2C), 130.4 (2C), 123.1, 82.1, 54.4, 29.5, 25.8, 18.3.

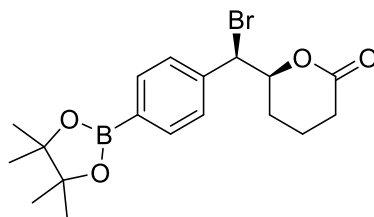

**6-(bromo(4-(4,4,5,5-tetramethyl-1,3,2-dioxaborolan-2-yl)phenyl)methyl)tetrahydro-2H-pyran-2-one (3d):** Prepared according to the general procedure B from **1d** using NBS (1.1 equiv, 39.2 mg) in HFIP (0.1 M, 2 mL) at room temperature. After 2 minutes, the reaction was added *p*TSA (5 mol%, 1.7 mg) and further stirred for 1 h. Purification by flash column chromatography eluting with hexanes/ethyl acetate (5/1) provided **3d** (67.8 mg, 86% yield) as a pale-yellow liquid.

$^1\text{H}$  NMR (400 MHz,  $\text{CDCl}_3$ )  $\delta$  7.81 – 7.76 (m, 2H), 7.45 – 7.40 (m, 2H), 5.05 (d,  $J = 5.7$  Hz, 1H), 4.63 (ddd,  $J = 10.5, 5.7, 3.4$  Hz, 1H), 2.63 – 2.54 (m, 1H), 2.44 – 2.38 (m, 1H), 2.21 – 2.13 (m, 1H), 1.94 (ddt,  $J = 13.2, 7.0, 4.4$  Hz, 1H), 1.84 – 1.69 (m, 2H), 1.33 (s, 11H);

$^{13}\text{C}$  NMR (101 MHz,  $\text{CDCl}_3$ )  $\delta$  135.2, 128.0, 84.1 (2C), 82.3 (2C), 55.7, 29.6, 25.4, 25.0 (4C), 18.3;

$^{11}\text{B}$  NMR (128 MHz,  $\text{CDCl}_3$ )  $\delta$  30.8;

**ESI-HRMS:** calcd for  $\text{C}_{18}\text{H}_{24}\text{B}^{79}\text{BrO}_4\text{H}^+$ :  $m/z = 395.1024$ , found:  $m/z = 395.1026$ ;

**FTIR (neat):** 2975, 1727, 1612, 1518, 1448, 1357, 1251  $\text{cm}^{-1}$ .

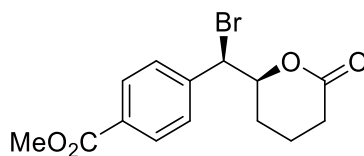

**Methyl 4-(bromo(6-oxotetrahydro-2H-pyran-2-yl)methyl)benzoate (3e):** Prepared according to the general procedure B from **1e** using NBS (1.1 equiv, 39.2 mg) in HFIP (0.1 M, 2 mL) at room temperature. After 2 minutes, the reaction was added *p*TSA (5 mol%, 1.7 mg) and further stirred for 1 h. Purification by flash column chromatography eluting with hexanes/ethyl acetate (5/1) provided **3e** (58.2 mg, 85% yield) as a yellow liquid.

**<sup>1</sup>H NMR (400 MHz, CDCl<sub>3</sub>)** δ 8.04 – 7.99 (m, 2H), 7.55 – 7.47 (m, 2H), 5.03 (d, *J* = 6.3 Hz, 1H), 4.67 (ddd, *J* = 10.8, 6.3, 3.4 Hz, 1H), 3.91 (s, 3H), 2.65 – 2.55 (m, 1H), 2.42 (ddd, *J* = 17.9, 9.7, 7.0 Hz, 1H), 2.29 – 2.21 (m, 1H), 1.96 (ddq, *J* = 13.6, 6.9, 4.8 Hz, 1H), 1.91 – 1.77 (m, 1H), 1.69 (dtd, *J* = 13.9, 11.1, 5.2 Hz, 1H);

**<sup>13</sup>C NMR (101 MHz, CDCl<sub>3</sub>)** δ 170.1, 166.5, 142.1, 130.7, 130.1 (2C), 128.8 (2C), 82.0, 54.5, 52.4, 29.5, 25.7, 18.3;

**ESI-HRMS:** calcd for C<sub>14</sub>H<sub>15</sub><sup>79</sup>BrO<sub>4</sub>Na<sup>+</sup>: *m/z* = 349.0046, found: *m/z* = 349.0040;

**FTIR (neat):** 3415, 2950, 2077, 1935, 1711, 1609, 1435, 1360, 1276, 1234 cm<sup>-1</sup>.

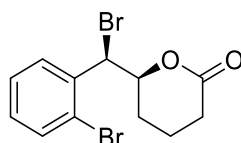

**6-(bromo(2-bromophenyl)methyl)tetrahydro-2H-pyran-2-one (3g):** Prepared according to the general procedure B from **1g** using NBS (1.1 equiv, 39.2 mg) in HFIP (0.1 M, 2 mL) at room temperature. After 2 minutes, the reaction was added *p*TSA (5 mol%, 1.7 mg) added and further stirred for 1 h. Purification by flash column chromatography eluting with hexanes/ethyl acetate (5/1) provided **3g** (51.9 mg, 75% yield) as a pale-yellow liquid.

**<sup>1</sup>H NMR (400 MHz, CDCl<sub>3</sub>)** δ 7.71 (dd, *J* = 7.9, 1.7 Hz, 1H), 7.55 (dd, *J* = 8.1, 1.3 Hz, 1H), 7.35 (td, *J* = 7.6, 1.3 Hz, 1H), 7.17 (ddd, *J* = 8.0, 7.3, 1.7 Hz, 1H), 5.64 (d, *J* = 5.7 Hz, 1H), 4.73 (ddd, *J* = 10.4, 5.7, 3.4 Hz, 1H), 2.66 – 2.57 (m, 1H), 2.49 – 2.41 (m, 1H), 2.22 – 2.15 (m, 1H), 1.96 (dtd, *J* = 8.9, 4.4, 2.6 Hz, 1H), 1.88 – 1.71 (m, 2H);

**<sup>13</sup>C NMR (101 MHz, CDCl<sub>3</sub>)** δ 170.2, 136.3, 133.1, 131.5, 130.3, 128.2, 123.8, 81.2, 53.4, 29.6, 25.2, 18.3;

**ESI-HRMS:** calcd for C<sub>12</sub>H<sub>12</sub><sup>79</sup>Br<sub>2</sub>O<sub>2</sub>H<sup>+</sup>: *m/z* = 346.9277, found: *m/z* = 346.9274;

**FTIR (neat):** 3060, 2957, 2251, 1733, 1439, 1360, 1231 cm<sup>-1</sup>.

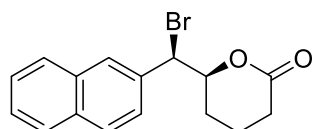

**6-(bromo(naphthalen-2-yl)methyl)tetrahydro-2H-pyran-2-one (3h):** Prepared according to the general procedure B from **1h** using NBS (1.1 equiv, 39.2 mg) in HFIP/DCM (1/4, 0.1 M, 2 mL) at room temperature. After 2 minutes, the reaction was added triflic acid (10 mol%, 3 mg)

and further stirred for 1 h. Due to the product **3h** degraded after silica gel column chromatography, only NMR yield of 76% was reported.

**ESI-HRMS:** calcd for  $C_{16}H_{15}^{79}BrO_2Na^+$ :  $m/z = 341.0148$ , found:  $m/z = 341.0148$  (result of crude reaction mixture);

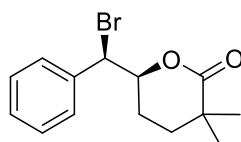

**6-(bromo(phenyl)methyl)-3,3-dimethyltetrahydro-2H-pyran-2-one (3j):** Prepared according to the general procedure B from **1j** using NBS (1.1 equiv, 39.2 mg) in HFIP (0.1 M, 2 mL) at room temperature. After 2 minutes, the reaction was added *p*TSA (5 mol%, 1.7 mg) and further stirred for 1 h. Purification by flash column chromatography eluting with hexanes/ethyl acetate (5/1) provided **3j** (45 mg, 76% yield) as a pale-yellow liquid.

**$^1H$  NMR (400 MHz,  $CDCl_3$ )**  $\delta$  7.47 – 7.42 (m, 2H), 7.38 – 7.30 (m, 3H), 5.10 (d,  $J = 5.1$  Hz, 1H), 4.60 (dt,  $J = 10.1, 5.1$  Hz, 1H), 2.05 – 1.94 (m, 2H), 1.75 – 1.68 (m, 2H), 1.28 (s, 3H), 1.23 (s, 3H);

**$^{13}C$  NMR (101 MHz,  $CDCl_3$ )**  $\delta$  128.9, 128.8 (4C), 83.1, 56.6, 33.8, 27.8, 27.3, 22.9;

**ESI-HRMS:** calcd for  $C_{14}H_{17}^{79}BrO_2Na^+$ :  $m/z = 319.0304$ , found:  $m/z = 319.0305$ ;

**FTIR (neat):** 3313, 2962, 2924, 2102, 1722, 1681, 1471, 1453, 1385, 1287  $cm^{-1}$ .

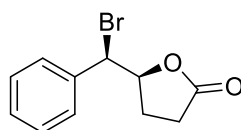

**5-(bromo(phenyl)methyl)dihydrofuran-2(3H)-one (3l):** Prepared according to the general procedure B from **1l** using NBS (1.1 equiv, 39.2 mg) in HFIP (0.1 M, 2 mL) at room temperature. After 2 minutes, the reaction was added *p*TSA (5 mol%, 1.7 mg) and further stirred for 1 h. Purification by flash column chromatography eluting with hexanes/ethyl acetate (5/1) provided **3l** (34.5 mg, 68% yield) as a white solid. Spectral data were in accordance with those previously reported.<sup>14</sup>

**<sup>1</sup>H NMR (400 MHz, CDCl<sub>3</sub>)** δ 7.43 (dd, *J* = 8.0, 1.7 Hz, 2H), 7.39 – 7.31 (m, 3H), 5.01 (d, *J* = 6.9 Hz, 1H), 4.95 – 4.89 (m, 1H), 2.57 – 2.49 (m, 3H), 2.33 – 2.23 (m, 1H);

**<sup>13</sup>C NMR (101 MHz, CDCl<sub>3</sub>)** δ 176.1, 137.2, 129.2, 129.0 (2C), 128.4 (2C), 81.8, 55.6, 28.7, 26.5.

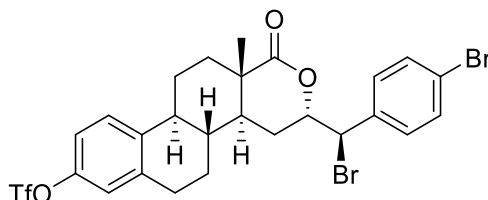

**(4a*S*,4b*R*,10b*S*,12a*S*)-3-(bromo(4-bromophenyl)methyl)-12a-methyl-1-oxo-3,4,4a,4b,5,6,10b,11,12,12a-decahydro-1*H*-naphtho[2,1-*f*]isochromen-8-yl**

**trifluoromethanesulfonate (3o):** Prepared according to the general procedure B from **1o** using NBS (1.1 equiv, 39.2 mg) in HFIP (0.1 M, 2 mL) at room temperature. After 2 minutes, the reaction was added *p*TSA (5 mol%, 1.7 mg) and further stirred for 1 h. Purification by flash column chromatography eluting with hexanes/ethyl acetate (5/1) provided **3o** as a mixture of diastereomers (34.5 mg, 91% yield, 1/1 ratio) as a white solid. Spectral data were in accordance with those previously reported.<sup>1</sup>

**<sup>1</sup>H NMR (400 MHz, CDCl<sub>3</sub>)** δ 7.54 – 7.48 (m, 2H), 7.38 – 7.30 (m, 3H), 7.04 (dd, *J* = 8.7, 2.7 Hz, 1H), 6.99 (dd, *J* = 2.7, 1.5 Hz, 1H), 5.09 (d, *J* = 4.7 Hz, 0.5H), 5.03 (d, *J* = 6.2 Hz, 0.5H), 4.89 (dt, *J* = 8.4, 5.9 Hz, 0.5H), 4.61 (dt, *J* = 10.9, 4.7 Hz, 0.5H), 2.98 – 2.83 (m, 2H), 2.44 – 2.26 (m, 3H), 2.26 – 2.10 (m, 1H), 2.10 – 1.93 (m, 1H), 1.87 – 1.61 (m, 3H), 1.65 – 1.23 (m, 3H, overlapping with H<sub>2</sub>O signal), 1.21 (s, 1.5H), 1.15 (s, 1.5H);

**<sup>13</sup>C NMR (101 MHz, CDCl<sub>3</sub>)** δ 176.1, 175.7, 147.8, 139.9, 139.8, 139.0, 138.9, 136.4, 136.0, 132.1, 132.0, 130.5, 130.3, 127.3, 127.2f, 123.1, 121.22, 121.19, 118.8 (q, <sup>1</sup>*J*<sub>C-F</sub> = 321.9 Hz), 118.6, 82.3, 77.4, 56.0, 55.7, 43.1, 42.9, 42.5, 41.2, 40.8, 40.3, 39.2, 37.3, 34.3, 34.2, 29.6, 29.5, 26.8, 25.9, 25.8, 25.28, 25.26, 24.6, 18.3, 15.6;

**<sup>19</sup>F NMR (376 MHz, CDCl<sub>3</sub>)** δ -72.9.

## NMR Spectra

**(E)-6-phenylhex-5-enoic acid (1a):**  $^1\text{H}$  NMR (400 MHz) and  $^{13}\text{C}$  NMR (101 MHz,  $\text{CDCl}_3$ )

AN01/AN01 -  $^1\text{H}$  NMR  
Supervisor Nguyen  
AN01-10mg  
 $^1\text{H}$   $\text{CDCl}_3$  /data/Rabi nap 32

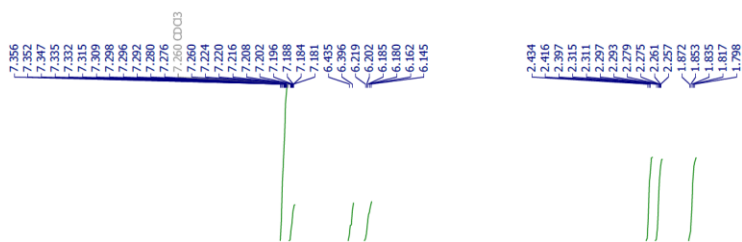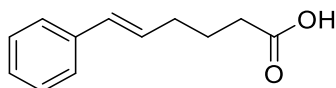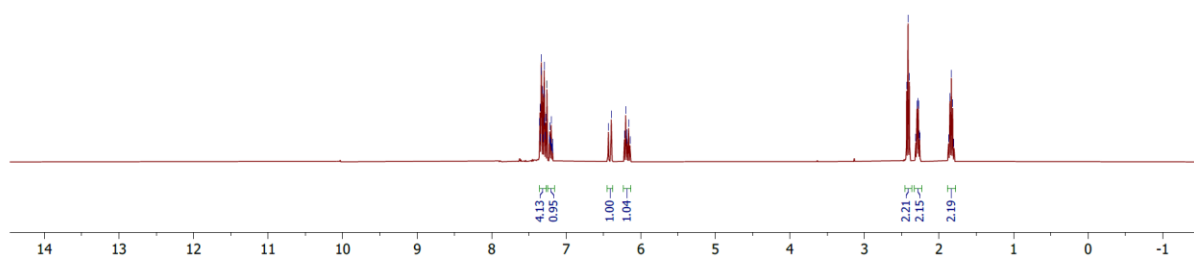

AN01/AN01 -  $^{13}\text{C}$  NMR  
Supervisor Nguyen  
AN01-10mg  
 $^{13}\text{C}$ .day  $\text{CDCl}_3$  /data/Rabi nap 32

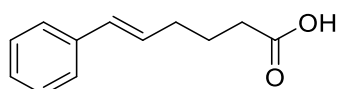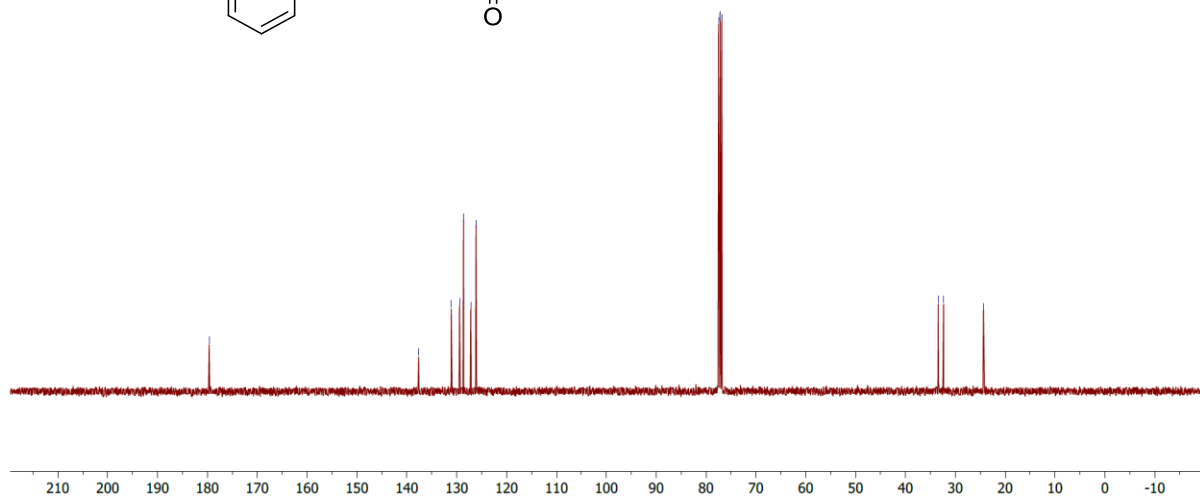



**(E)-6-(p-tolyl)hex-5-enoic acid (1b):** <sup>1</sup>H NMR (400 MHz) and <sup>13</sup>C NMR (101 MHz, CDCl<sub>3</sub>)

AN14/AN14 - 1H NMR  
Supervisor Nguyen  
AN14-10mg  
1H CDCl<sub>3</sub> /data/Rabi nap 49

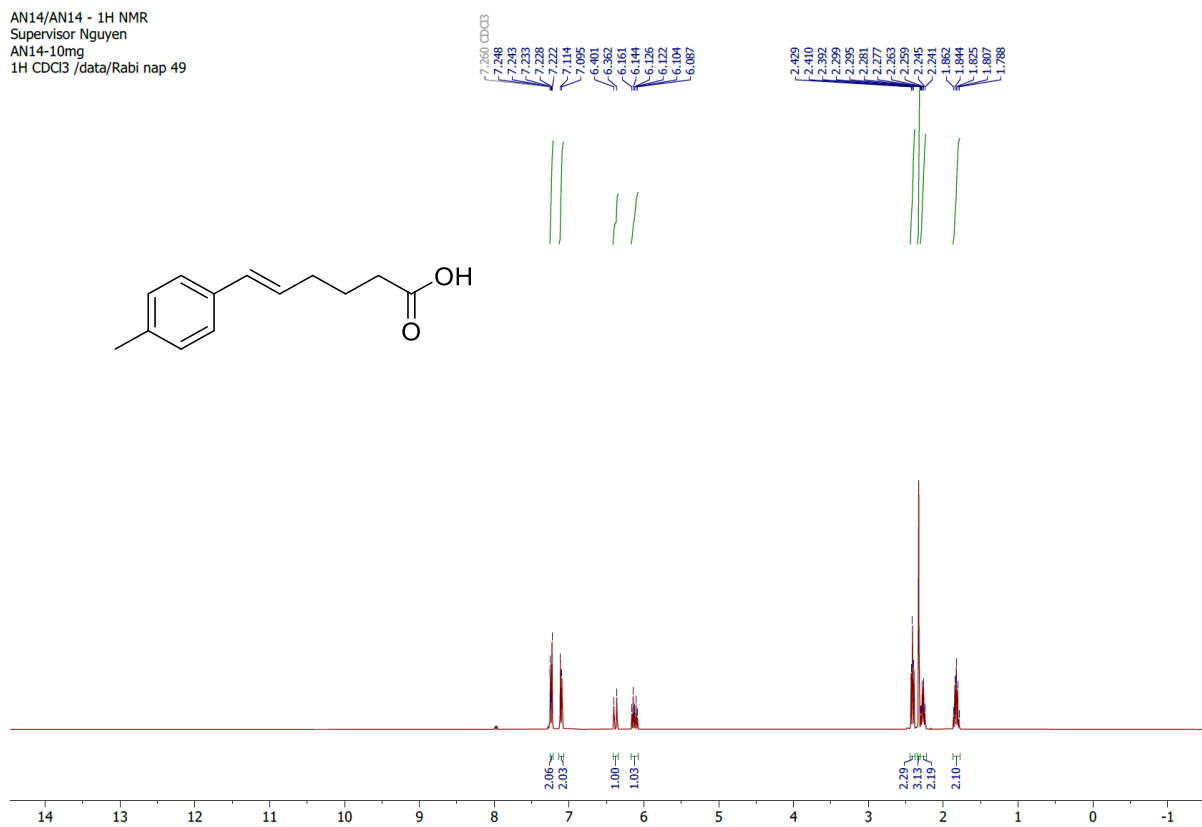

AN14/AN14 - 13C NMR  
Supervisor Nguyen  
AN14-10mg  
13C.day CDCl<sub>3</sub> /data/Rabi nap 49

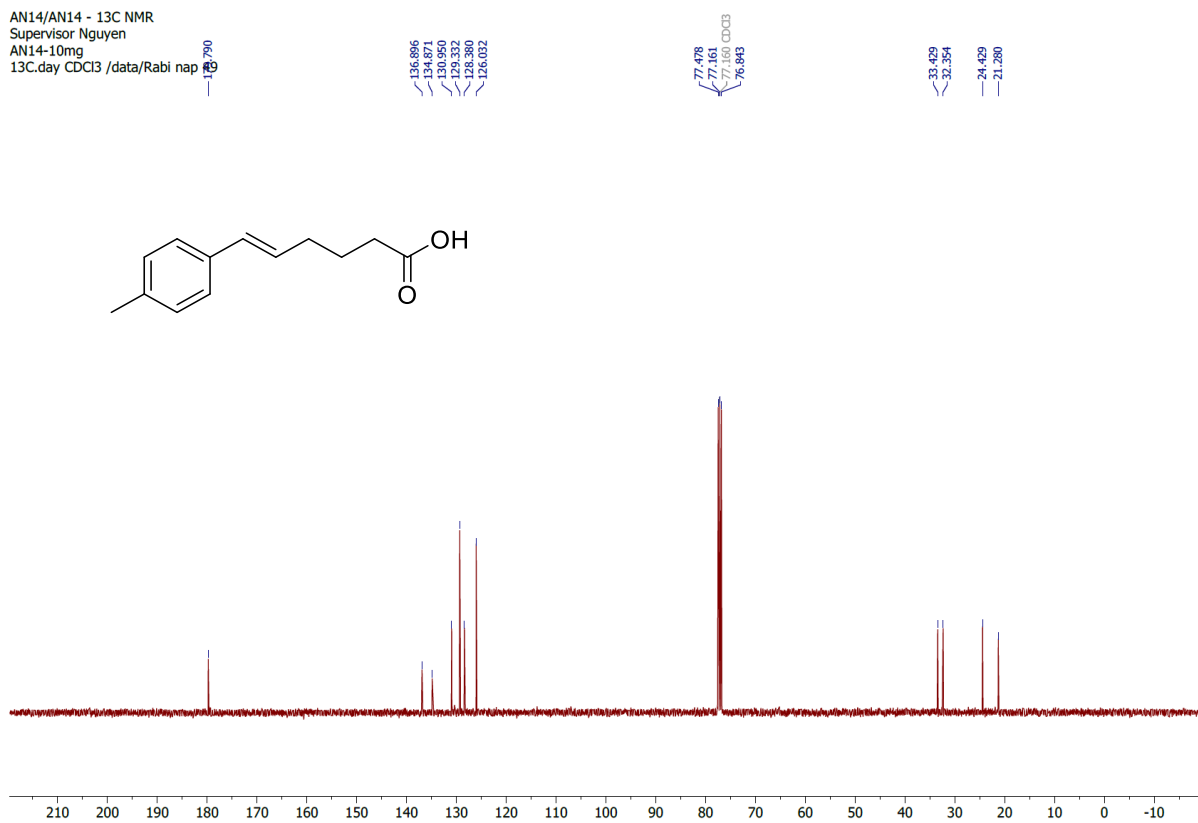

**(E)-6-(4-bromophenyl)hex-5-enoic acid (1c):**  $^1\text{H}$  NMR (400 MHz) and  $^{13}\text{C}$  NMR (101 MHz,  $\text{CDCl}_3$ )

AN28/AN28 -  $^1\text{H}$  NMR  
Supervisor Nguyen  
4-Br-substrate  
 $^1\text{H}$   $\text{CDCl}_3$  /data/Rabi nap 41

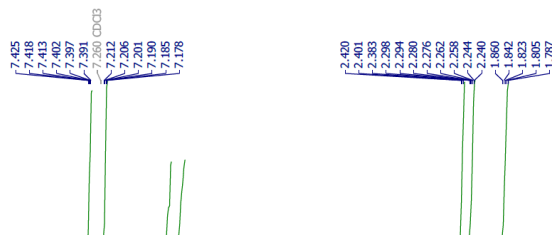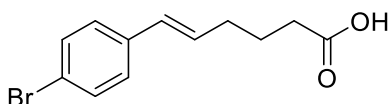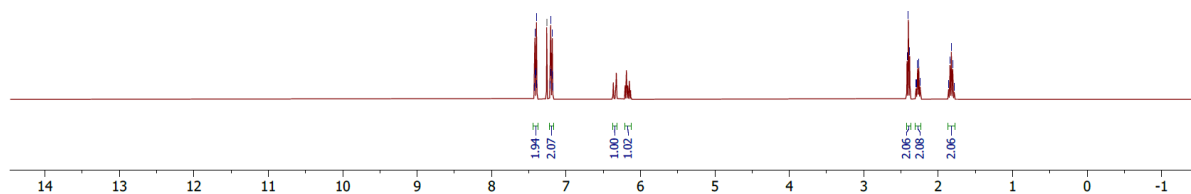

AN28/AN28 -  $^{13}\text{C}$  NMR  
Supervisor Nguyen  
4-Br-substrate  
 $^{13}\text{C}$ .day  $\text{CDCl}_3$  /data/Rabi nap 41

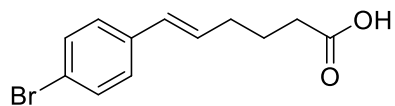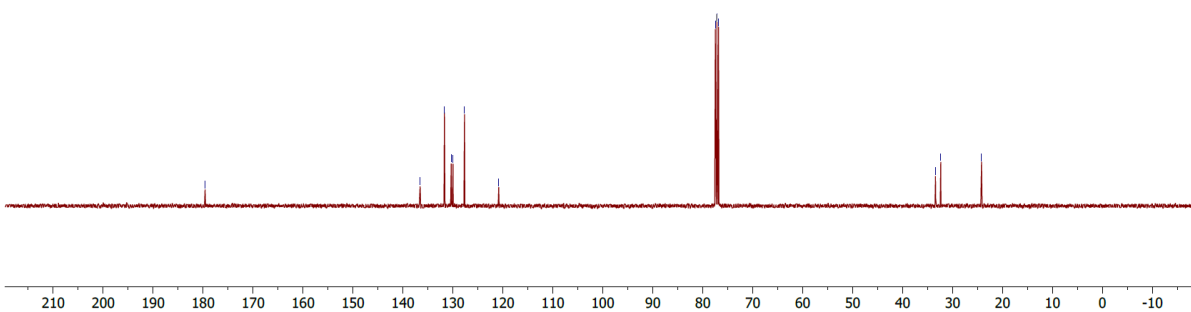

**(E)-6-(4-(4,4,5,5-tetramethyl-1,3,2-dioxaborolan-2-yl)phenyl)hex-5-enoic acid (1d):**  $^1\text{H}$  NMR (400 MHz),  $^{13}\text{C}$  NMR (101 MHz,  $\text{CDCl}_3$ ) and  $^{11}\text{B}$  NMR (128 MHz,  $\text{CDCl}_3$ )

AN21/AN21 -  $^1\text{H}$  NMR  
 Supervisor Nguyen  
 AN21-10mg  
 $^1\text{H}$   $\text{CDCl}_3$  /data/Rabi nap 14

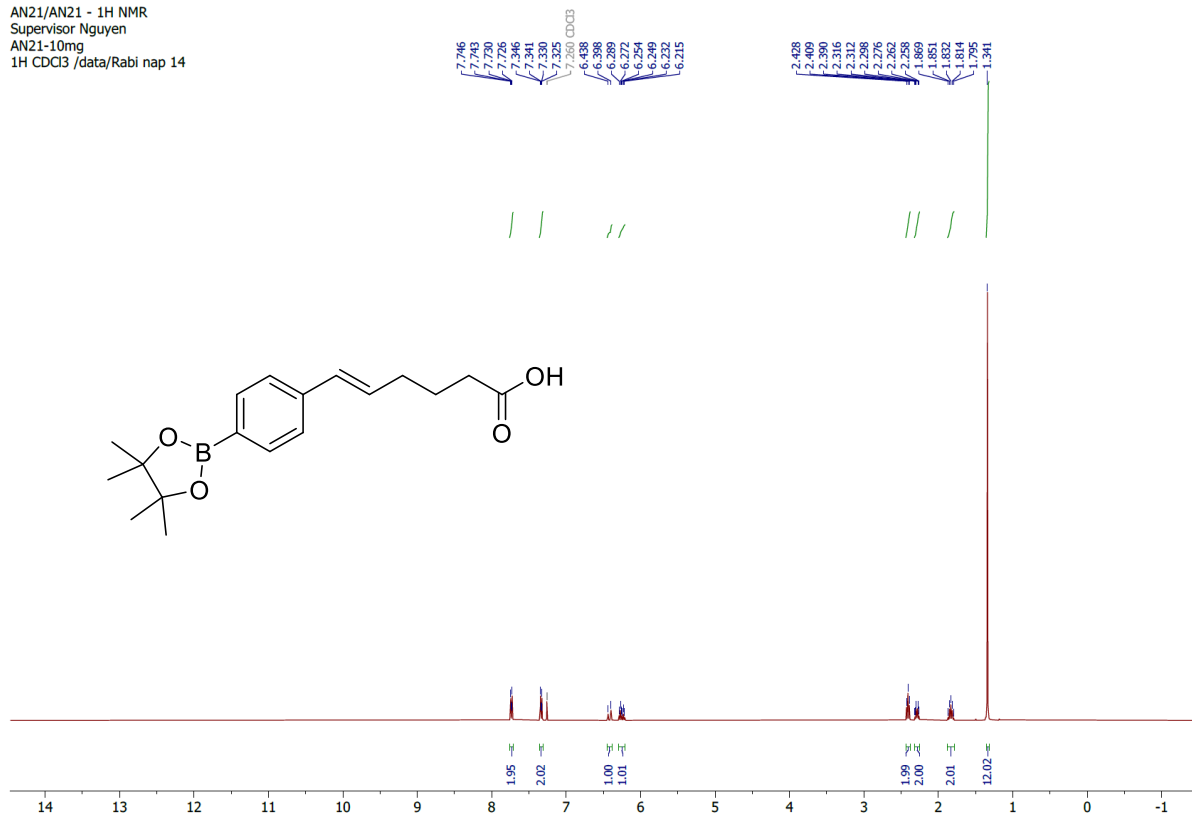

AN21/AN21 -  $^{13}\text{C}$  NMR  
 Supervisor Nguyen  
 AN21-10mg  
 $^{13}\text{C}$ .day  $\text{CDCl}_3$  /data/Rabi nap 14

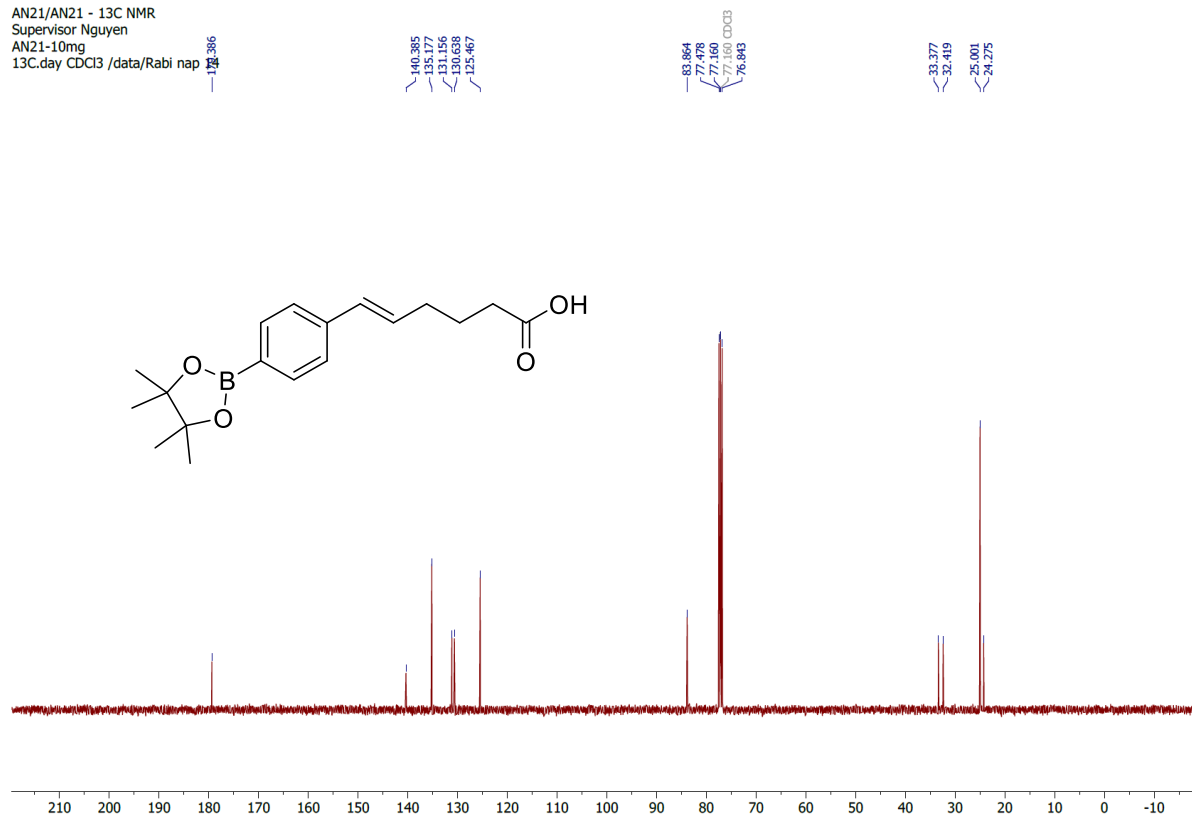

230422-nap.16.fid  
Supervisor Nguyen  
AN21-10mg  
11B CDCl3 /data/Rabi nap 14

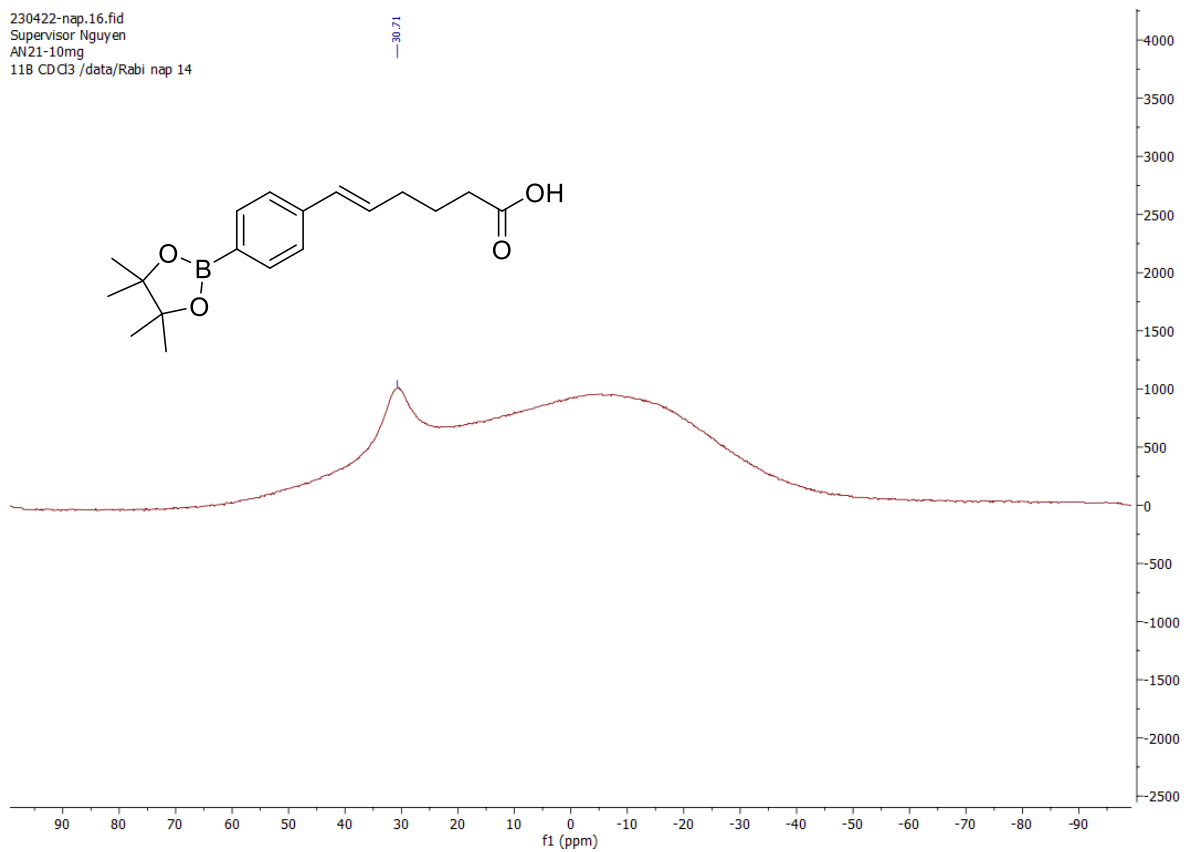

**(E)-6-(4-(methoxycarbonyl)phenyl)hex-5-enoic acid (1e):**  $^1\text{H}$  NMR (400 MHz) and  $^{13}\text{C}$  NMR (101 MHz,  $\text{CDCl}_3$ )

AN06/AN06 -  $^1\text{H}$  NMR  
 Supervisor Nguyen  
 AN06-10mg  
 $^1\text{H}$   $\text{CDCl}_3$  /data/Rabi nap 33

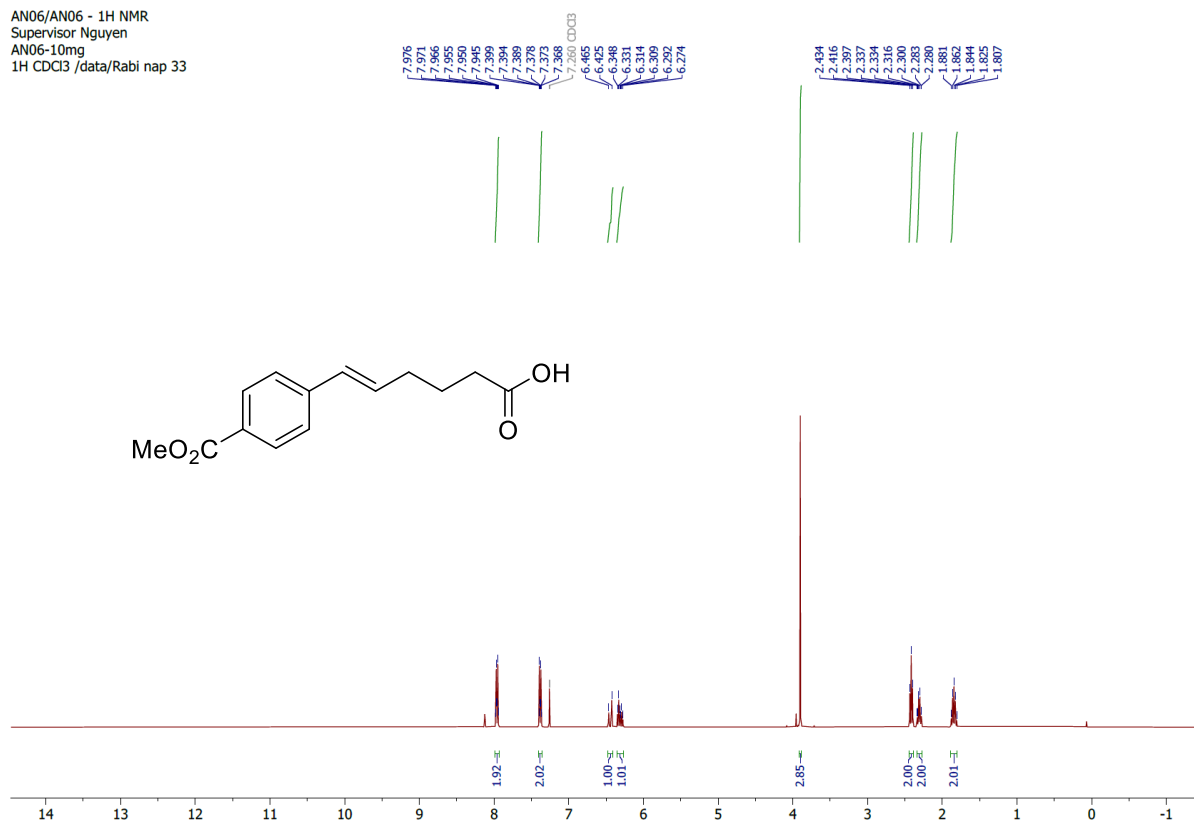

AN06/AN06 -  $^{13}\text{C}$  NMR  
 Supervisor Nguyen  
 AN06-10mg  
 $^{13}\text{C}$ .day  $\text{CDCl}_3$  /data/Rabi nap 33

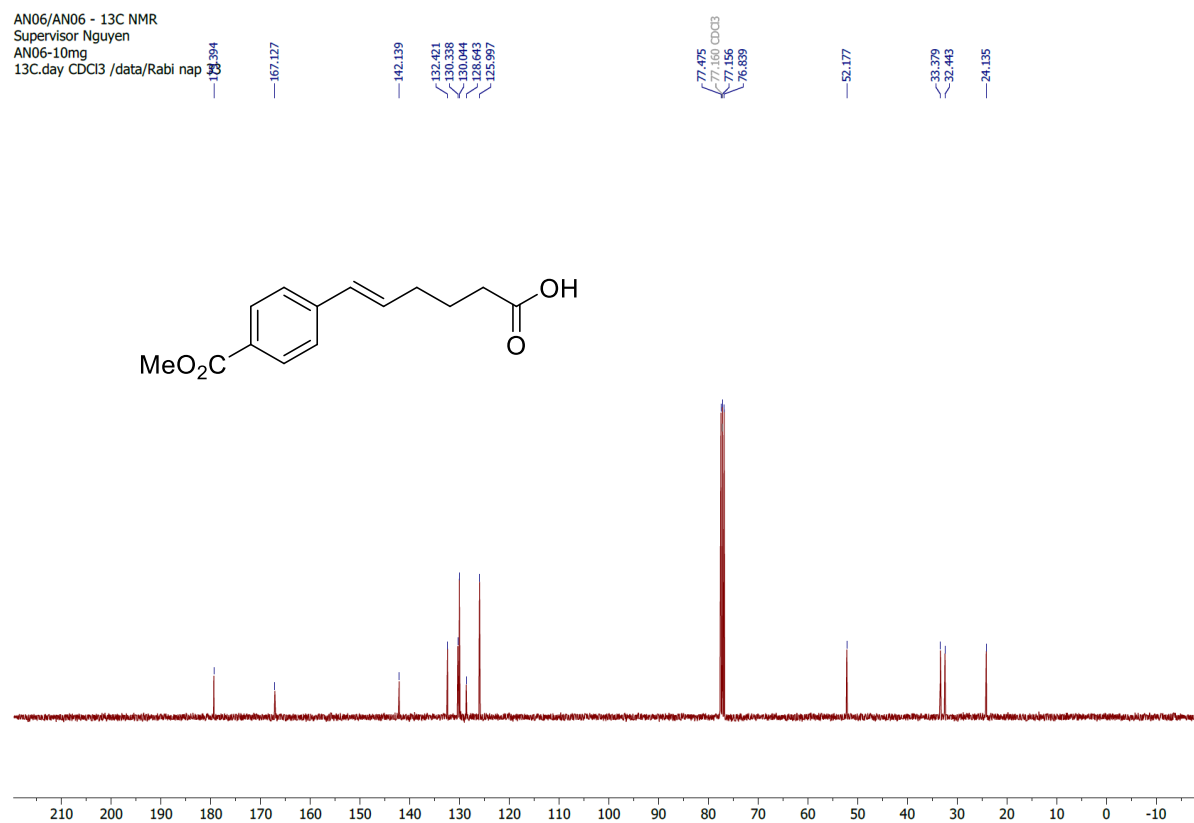

**(E)-6-(4-methoxyphenyl)hex-5-enoic acid (1f):**  $^1\text{H}$  NMR (400 MHz) and  $^{13}\text{C}$  NMR (101 MHz,  $\text{CDCl}_3$ )

AN25/AN25 -  $^1\text{H}$  NMR  
Supervisor Nguyen  
AN25-10mg  
 $^1\text{H}$   $\text{CDCl}_3$  /data/Rabi nap 52

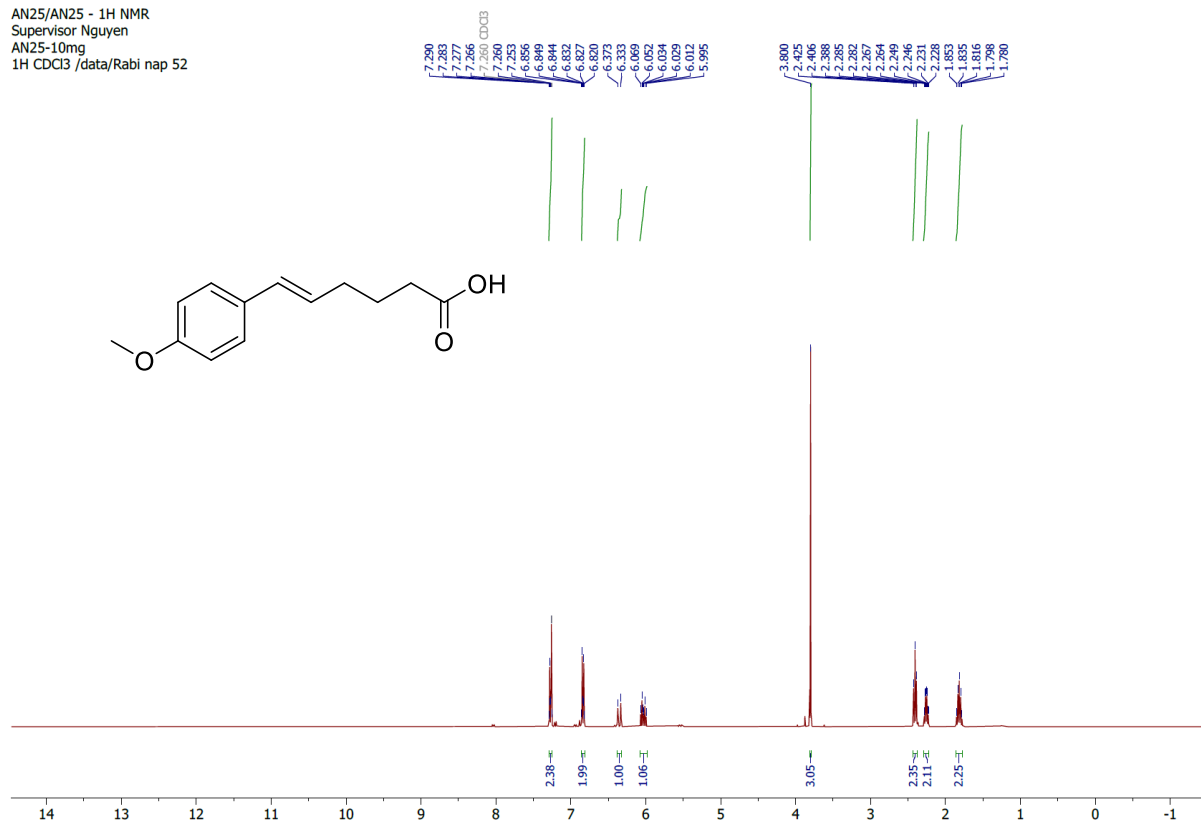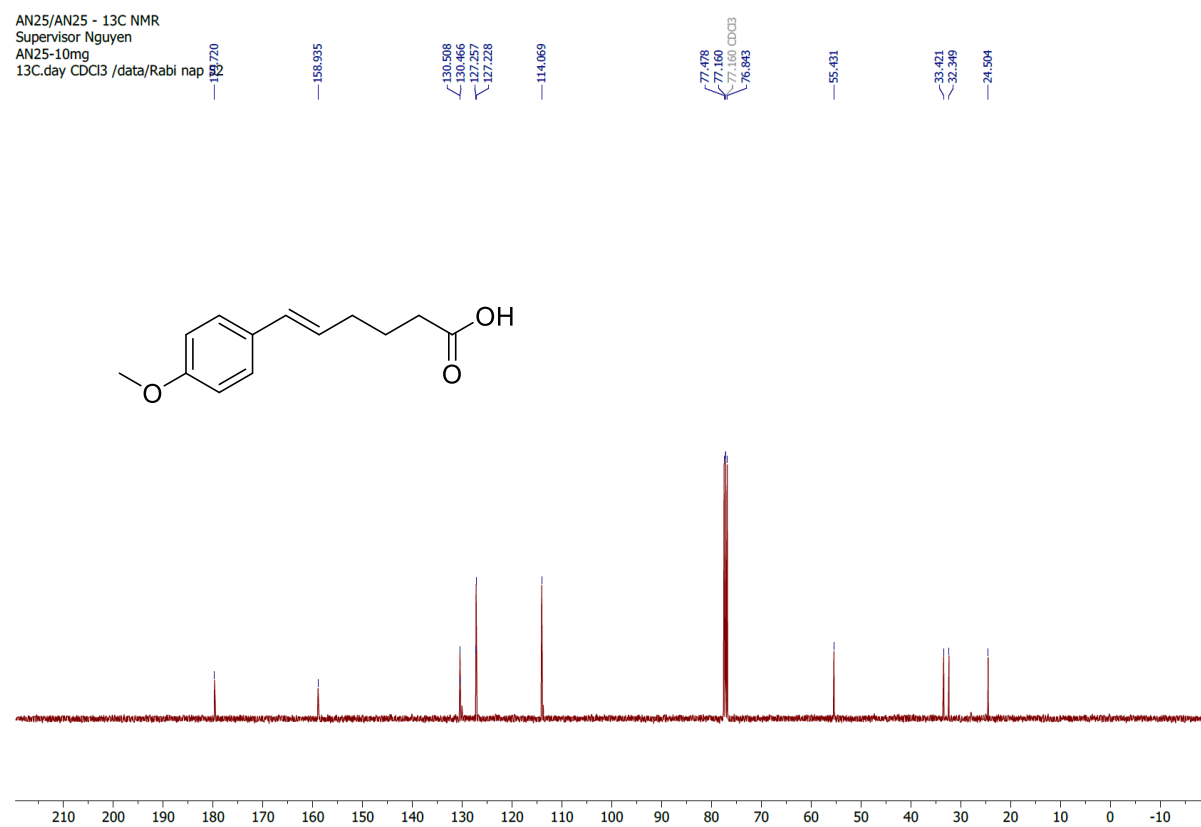

**(E)-6-(2-bromophenyl)hex-5-enoic acid (1g): <sup>1</sup>H NMR (400 MHz) and <sup>13</sup>C NMR (101 MHz, CDCl<sub>3</sub>)**

AN19/AN19 - <sup>1</sup>H NMR  
Supervisor Nguyen  
AN19-10mg  
1H CDCl<sub>3</sub> /data/Rabi nap 10

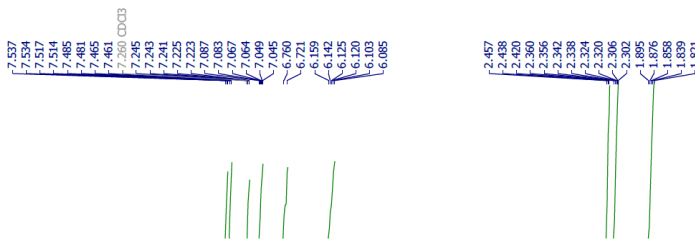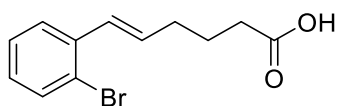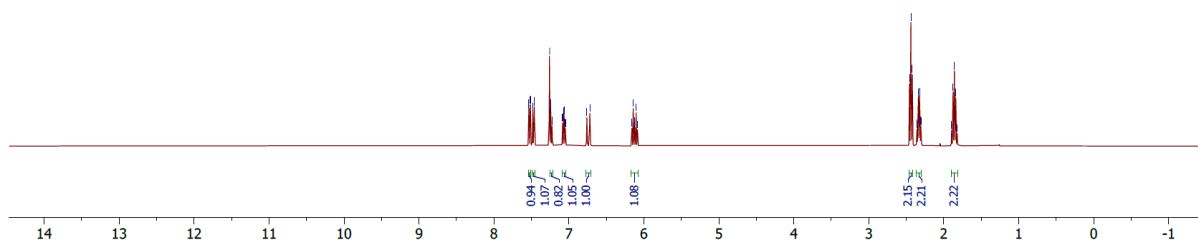

AN19/AN19 - <sup>13</sup>C NMR  
Supervisor Nguyen  
AN19-10mg  
13C.day CDCl<sub>3</sub> /data/Rabi nap

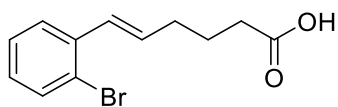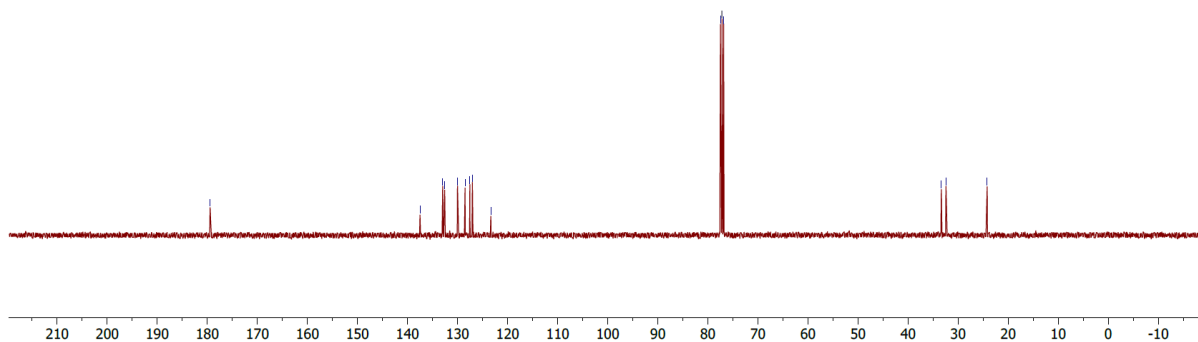

**(E)-6-(naphthalen-2-yl)hex-5-enoic acid (1h):**  $^1\text{H}$  NMR (400 MHz) and  $^{13}\text{C}$  NMR (101 MHz,  $\text{CDCl}_3$ )

AN12/AN12 -  $^1\text{H}$  NMR  
 Supervisor Nguyen  
 AN12-10mg  
 $^1\text{H}$   $\text{CDCl}_3$  /data/Rabi nap 34

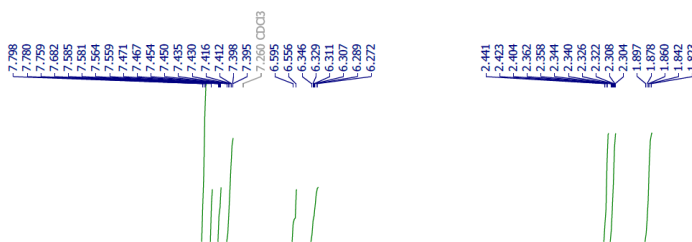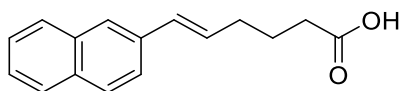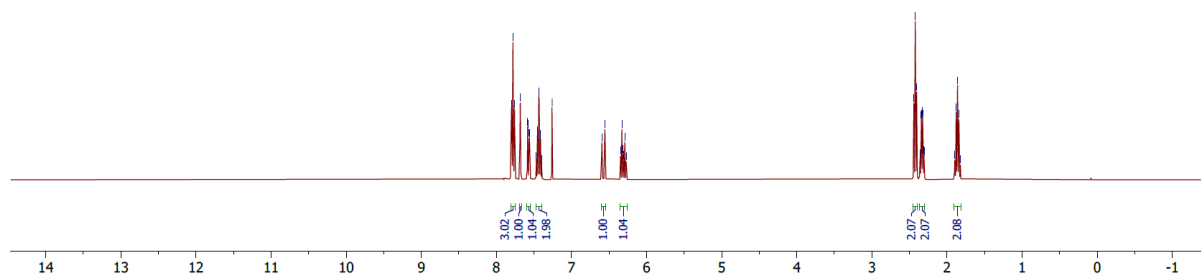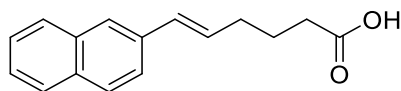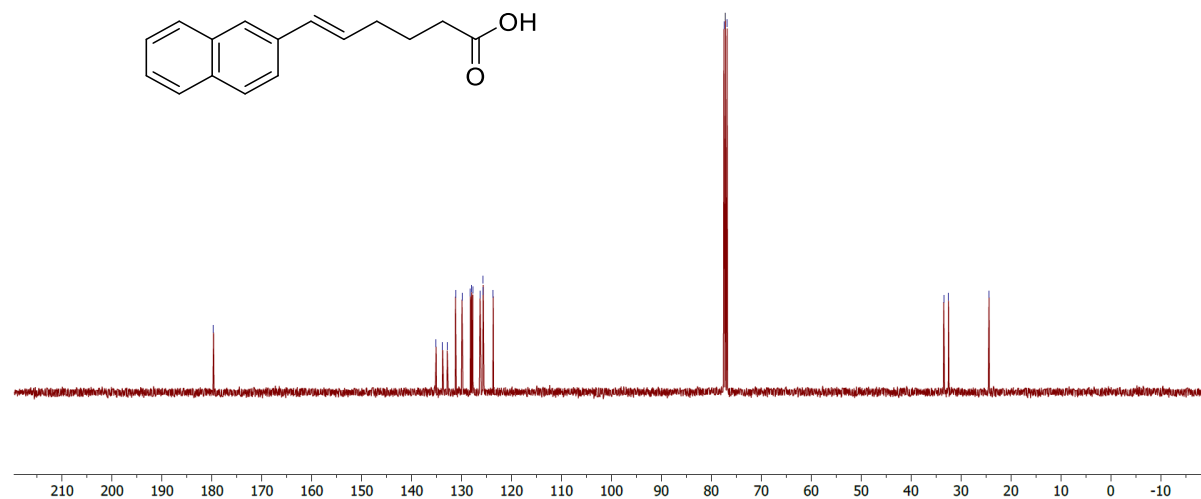



**(E)-6-(naphthalen-1-yl)hex-5-enoic acid (1i):**  $^1\text{H}$  NMR (400 MHz) and  $^{13}\text{C}$  NMR (101 MHz,  $\text{CDCl}_3$ )

AN13/AN13 -  $^1\text{H}$  NMR  
 Supervisor Nguyen  
 AN13-10mg  
 $^1\text{H}$   $\text{CDCl}_3$  /data/Rabi nap

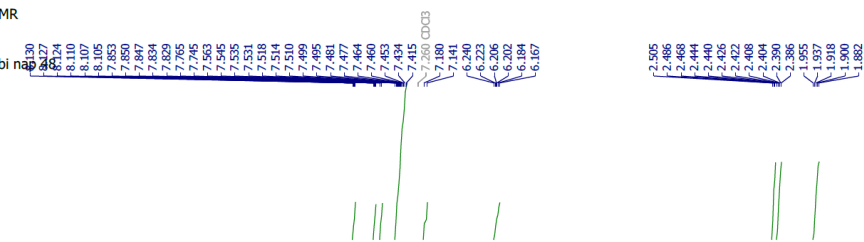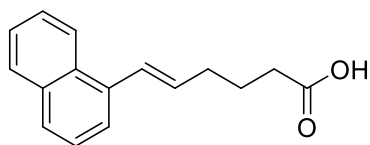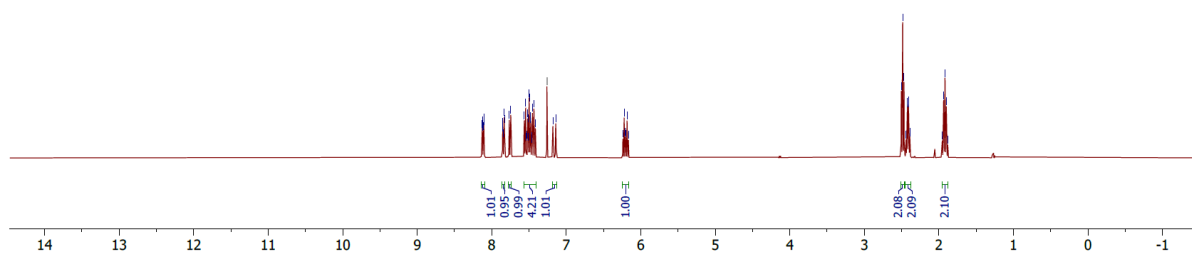

AN13/AN13 -  $^{13}\text{C}$  NMR  
 Supervisor Nguyen  
 AN13-10mg  
 $^{13}\text{C}$ .day  $\text{CDCl}_3$  /data/Rabi nap

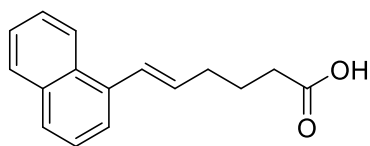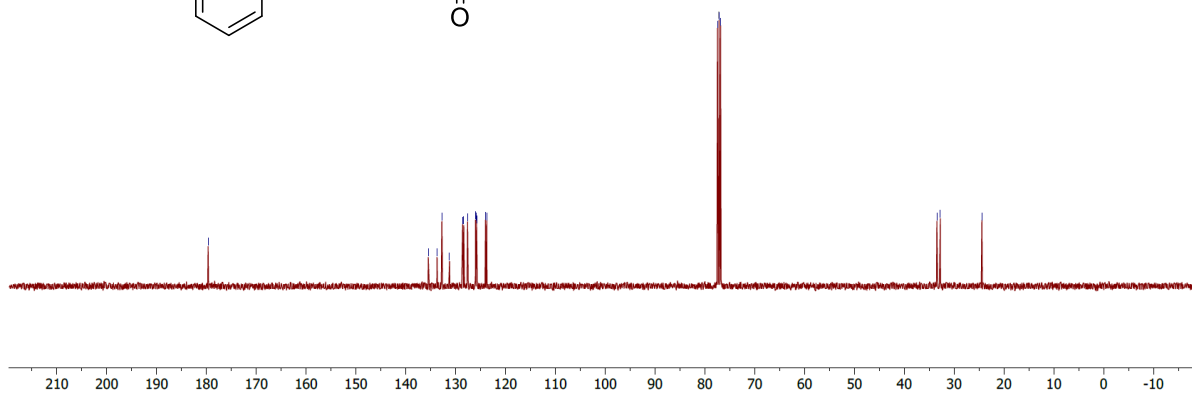

**(E)-2,2-dimethyl-6-phenylhex-5-enoic acid (1j):**  $^1\text{H}$  NMR (400 MHz) and  $^{13}\text{C}$  NMR (101 MHz,  $\text{CDCl}_3$ )

AN20/AN20 -  $^1\text{H}$  NMR  
 Supervisor Nguyen  
 AN20-10mg  
 $^1\text{H}$   $\text{CDCl}_3$  /data/Rabi nap 50

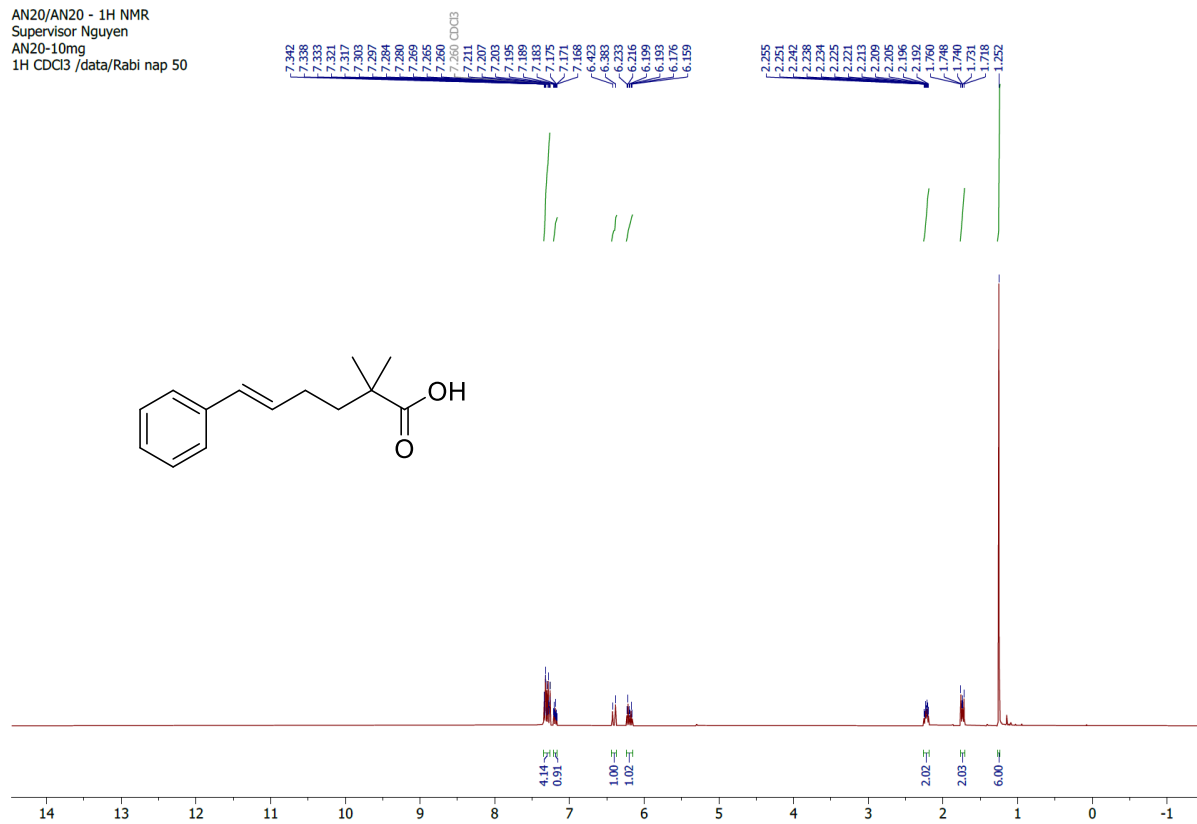

AN20/AN20 -  $^{13}\text{C}$  NMR  
 Supervisor Nguyen  
 AN20-10mg  
 $^{13}\text{C}$ .day  $\text{CDCl}_3$  /data/Rabi nap 50

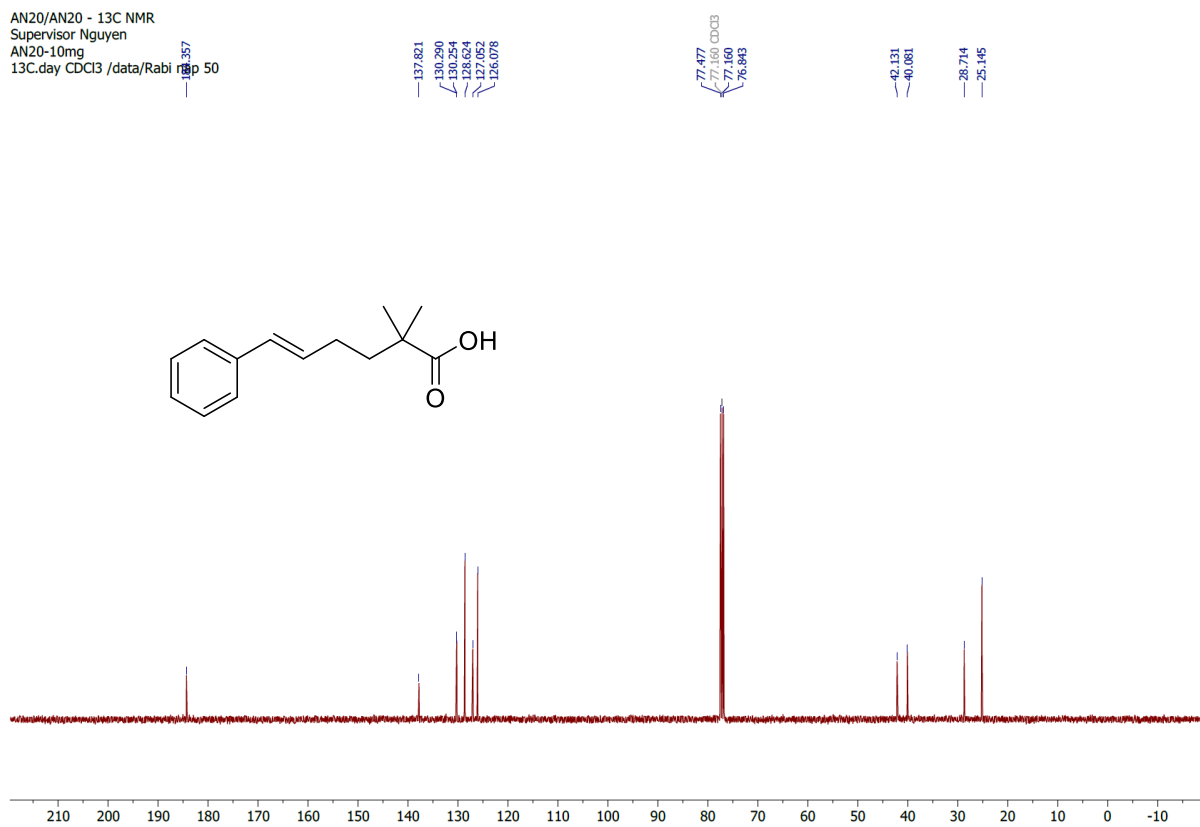

**(E)-6-(thiophen-2-yl)hex-5-enoic acid (1k):**  $^1\text{H}$  NMR (400 MHz) and  $^{13}\text{C}$  NMR (101 MHz,  $\text{CDCl}_3$ )

AN26/AN26 -  $^1\text{H}$  NMR  
Supervisor Nguyen  
AN26-10mg  
 $^1\text{H}$   $\text{CDCl}_3$  /data/Rabi nap 53

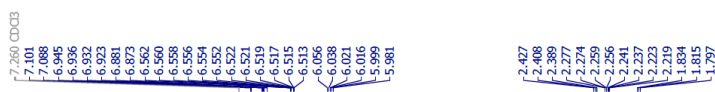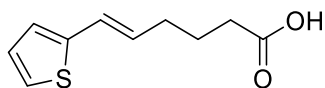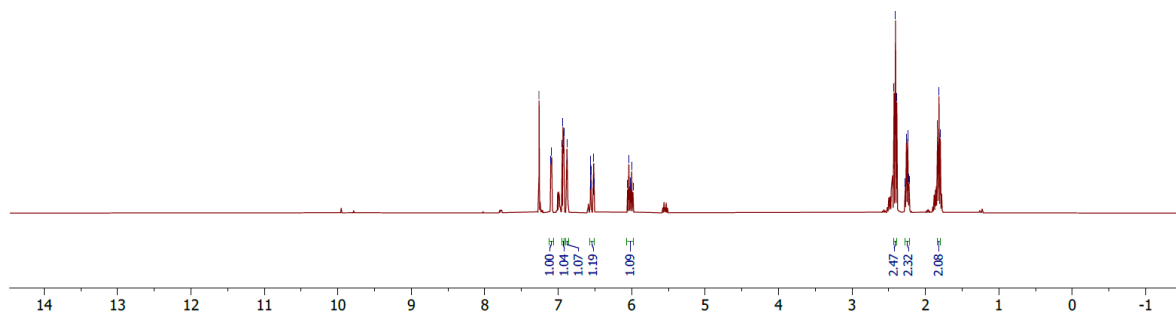

AN26/AN26 -  $^{13}\text{C}$  NMR  
Supervisor Nguyen  
AN26-10mg  
 $^{13}\text{C}$ .day  $\text{CDCl}_3$  /data/Rabi nap 53

186.65

142.817

129.349

127.372

124.705

124.353

123.511

77.477

77.160

77.160

76.842

33.371

32.145

24.248

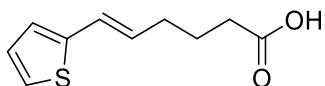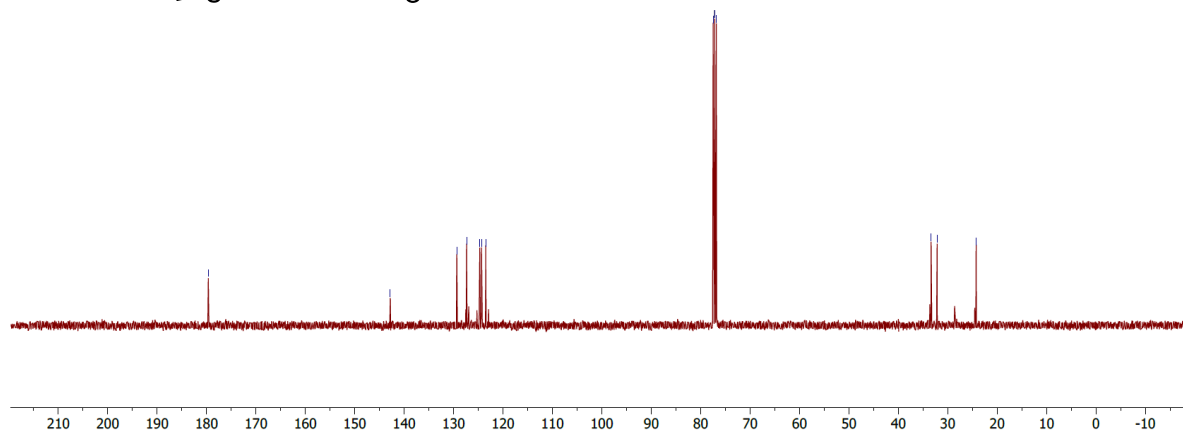

**(E)-5-phenylpent-4-enoic acid (11):  $^1\text{H}$  NMR (400 MHz) and  $^{13}\text{C}$  NMR (101 MHz,  $\text{CDCl}_3$ )**

231120-nap.3.fid  
AN29

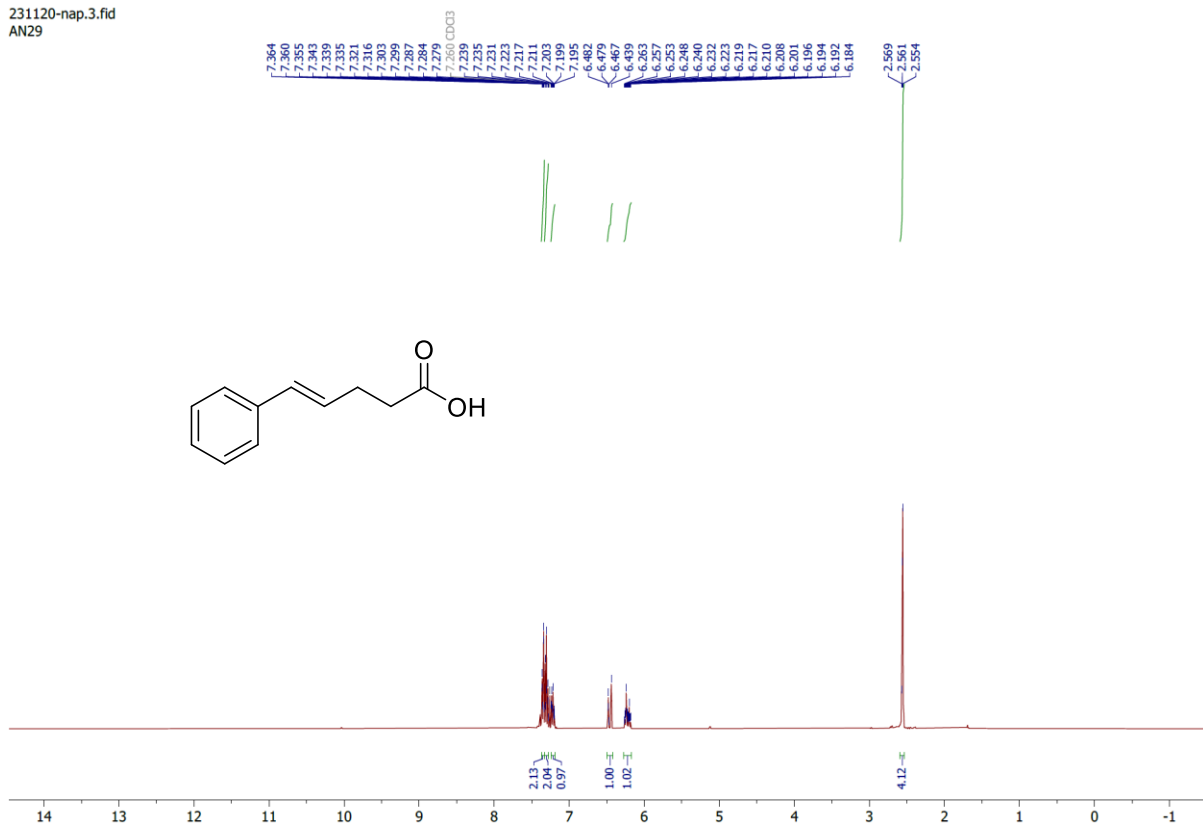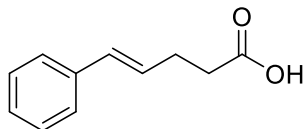

AN29/AN29 -  $^{13}\text{C}$  NMR  
Supervisor Nguyen  
AN29  
13C.day  $\text{CDCl}_3$  /data/Rabi nap

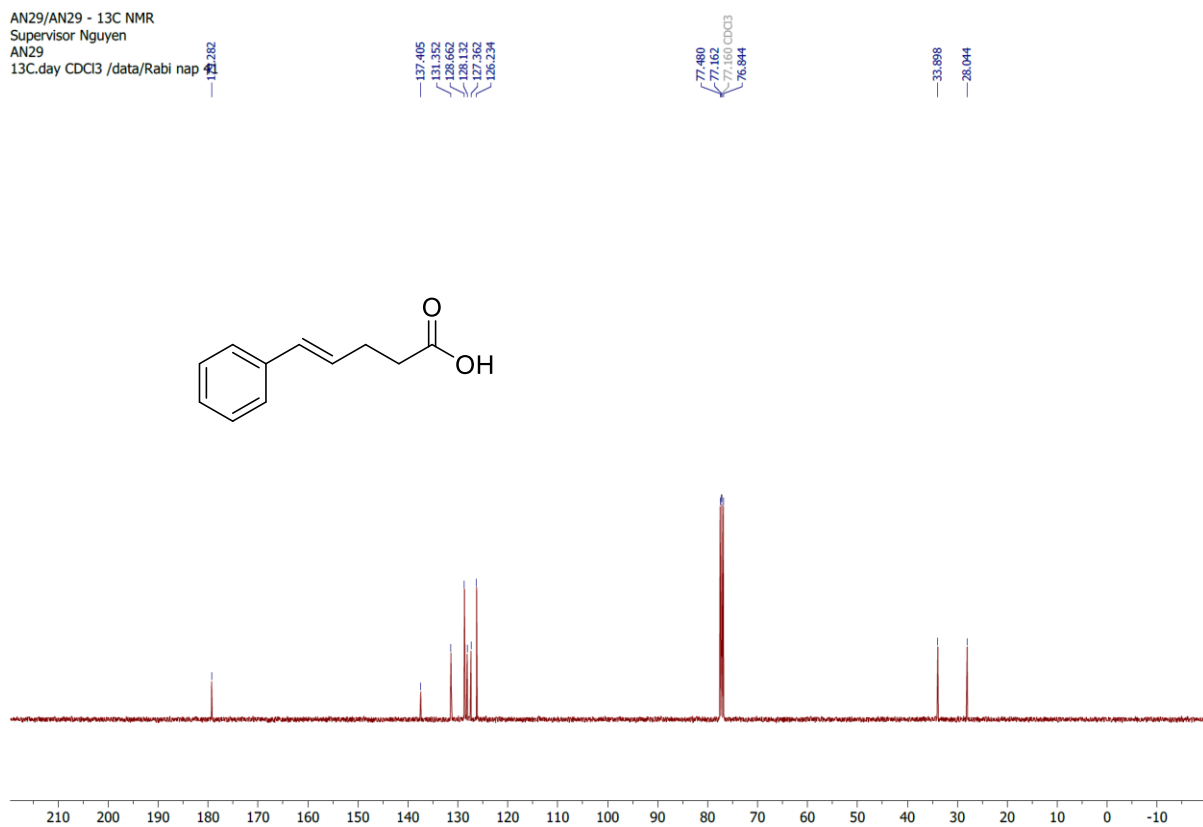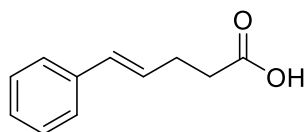

**(E)-7-phenylhept-6-enoic acid (1m): <sup>1</sup>H NMR (400 MHz) and <sup>13</sup>C NMR (101 MHz, CDCl<sub>3</sub>)**

AN24/AN24 - <sup>1</sup>H NMR  
Supervisor Nguyen  
AN24-10mg  
1H CDCl<sub>3</sub> /data/Rabi nap 51

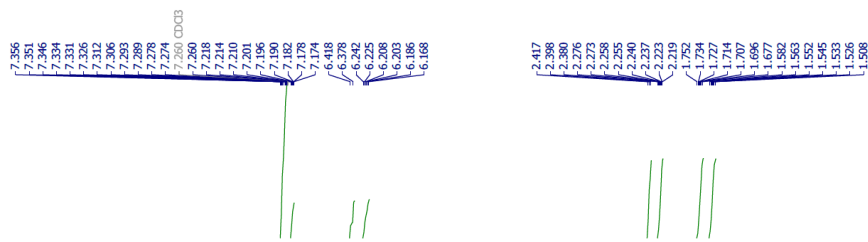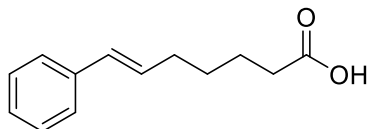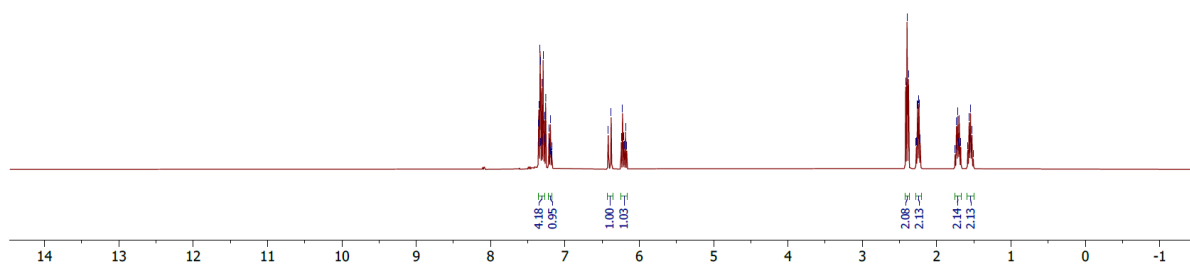

AN24/AN24 - <sup>13</sup>C NMR  
Supervisor Nguyen  
AN24-10mg  
13C.day CDCl<sub>3</sub> /data/Rabi nap

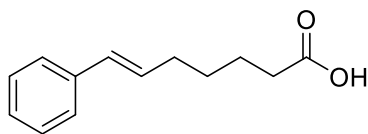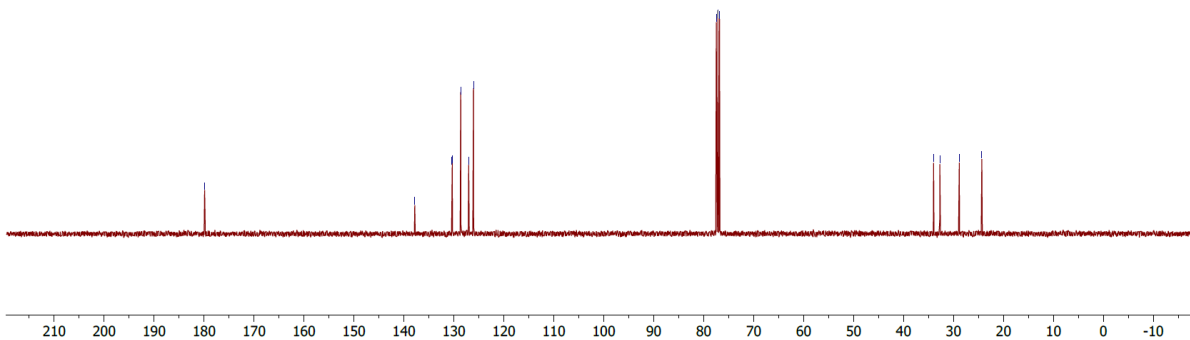

**(E)-2,2-dimethyl-7-phenylhept-6-enoic acid (1n):**  $^1\text{H}$  NMR (400 MHz) and  $^{13}\text{C}$  NMR (101 MHz,  $\text{CDCl}_3$ )

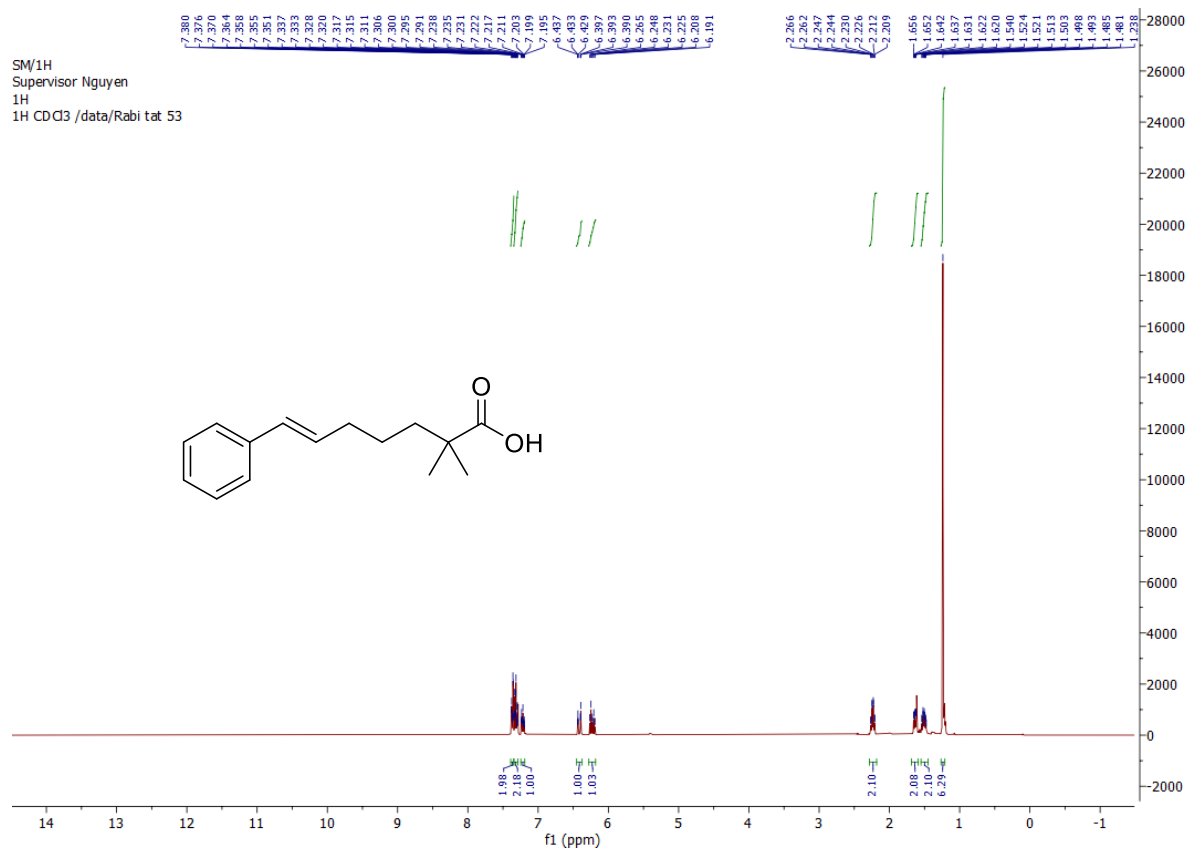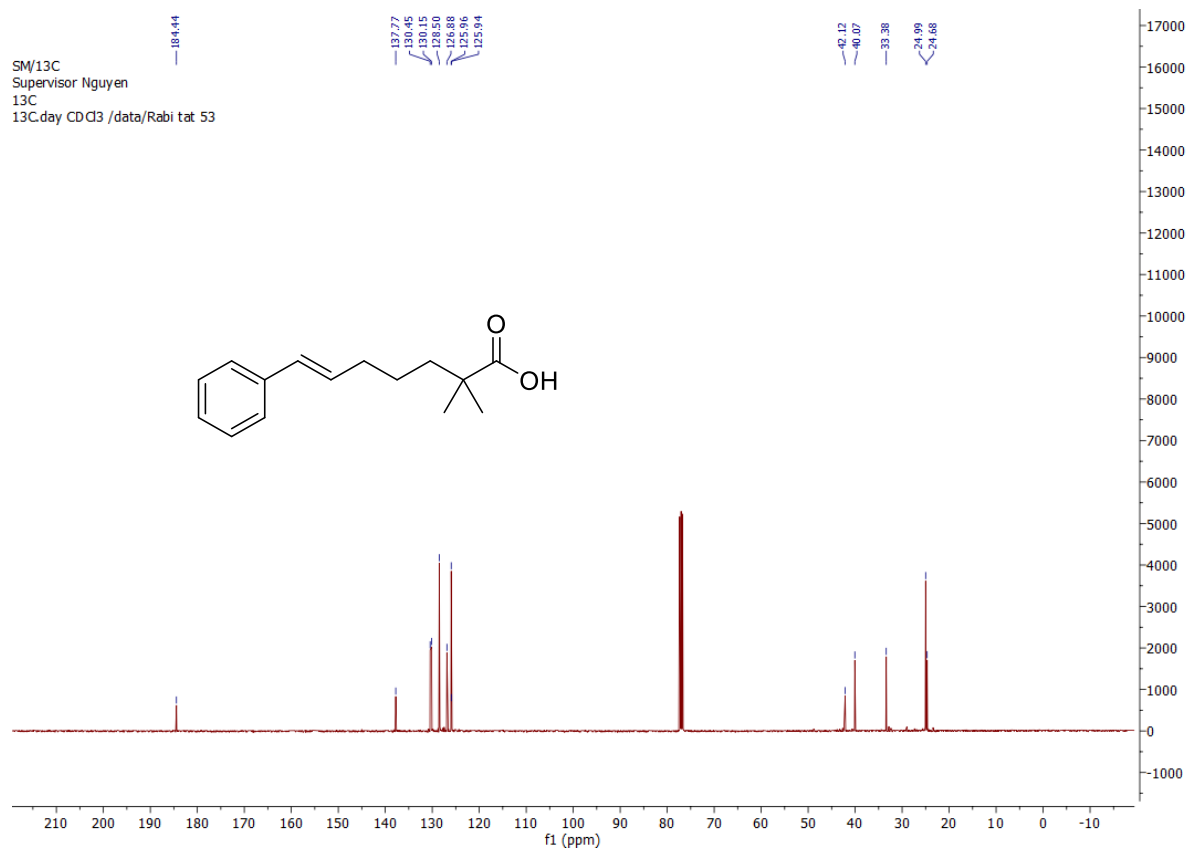

**(E)-6-(4-fluorophenyl)hex-5-enoic acid (1p):**  $^1\text{H}$  NMR (400 MHz),  $^{13}\text{C}$  NMR (101 MHz,  $\text{CDCl}_3$ ) and  $^{19}\text{F}$  NMR (376 MHz,  $\text{CDCl}_3$ )

AN23/AN23 -  $^1\text{H}$  NMR  
 Supervisor Nguyen  
 AN23-10mg  
 $^1\text{H}$   $\text{CDCl}_3$  /data/Rabi nap 16

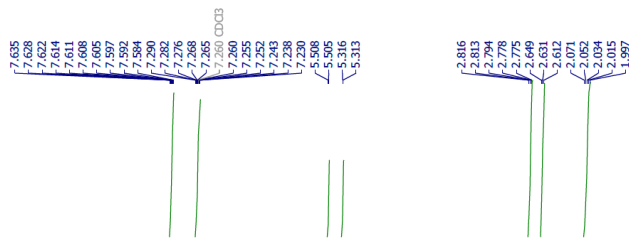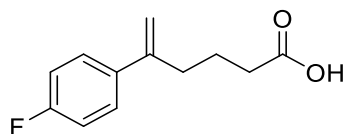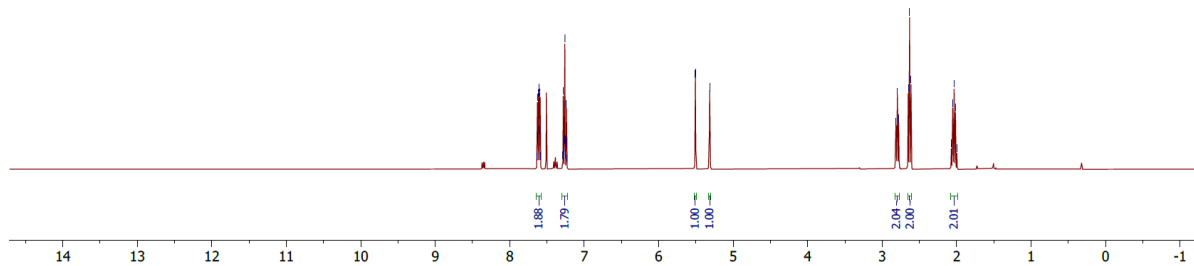

AN23/AN23 -  $^{13}\text{C}$  NMR  
 Supervisor Nguyen  
 AN23-10mg  
 $^{13}\text{C}$ .night  $\text{CDCl}_3$  /data/Rabi nap 16

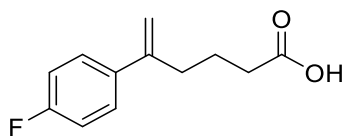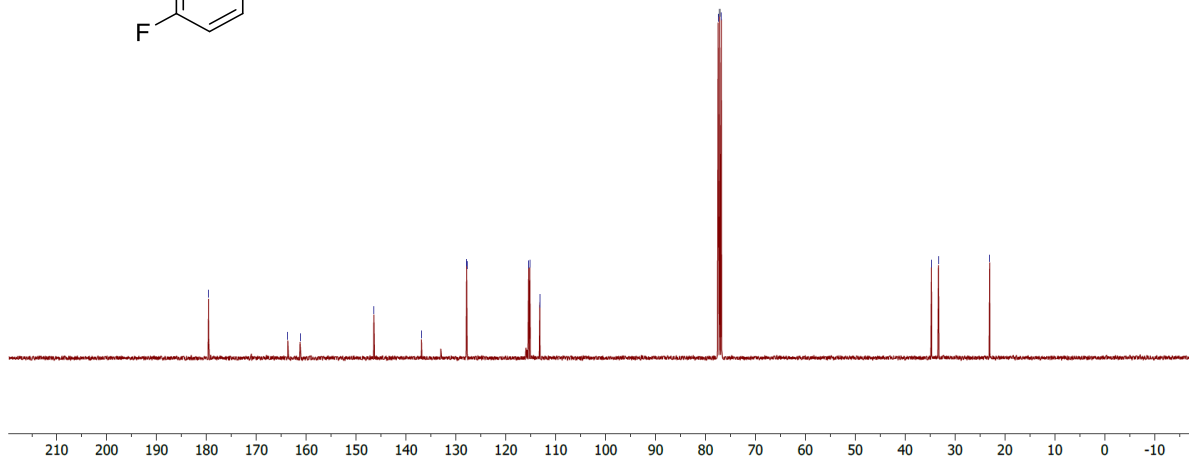

AN23/AN23 - 19F  
Supervisor Nguyen  
AN23-10mg  
19F CDCl3 /data/Rabi nap 16

-115.114  
-115.122  
-115.136  
-115.151  
-115.159

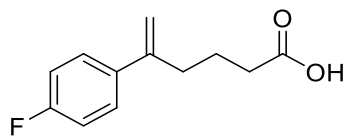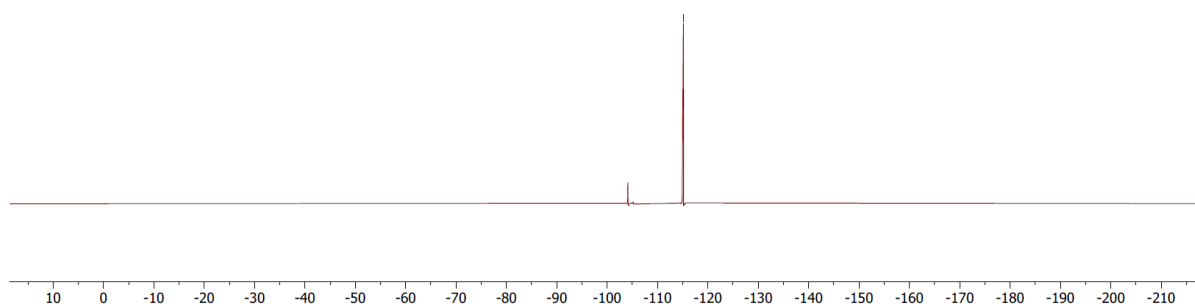



**(E)-2-styrylbenzoic acid (1q):**  $^1\text{H}$  NMR (400 MHz) and  $^{13}\text{C}$  NMR (101 MHz,  $\text{CDCl}_3$ ).

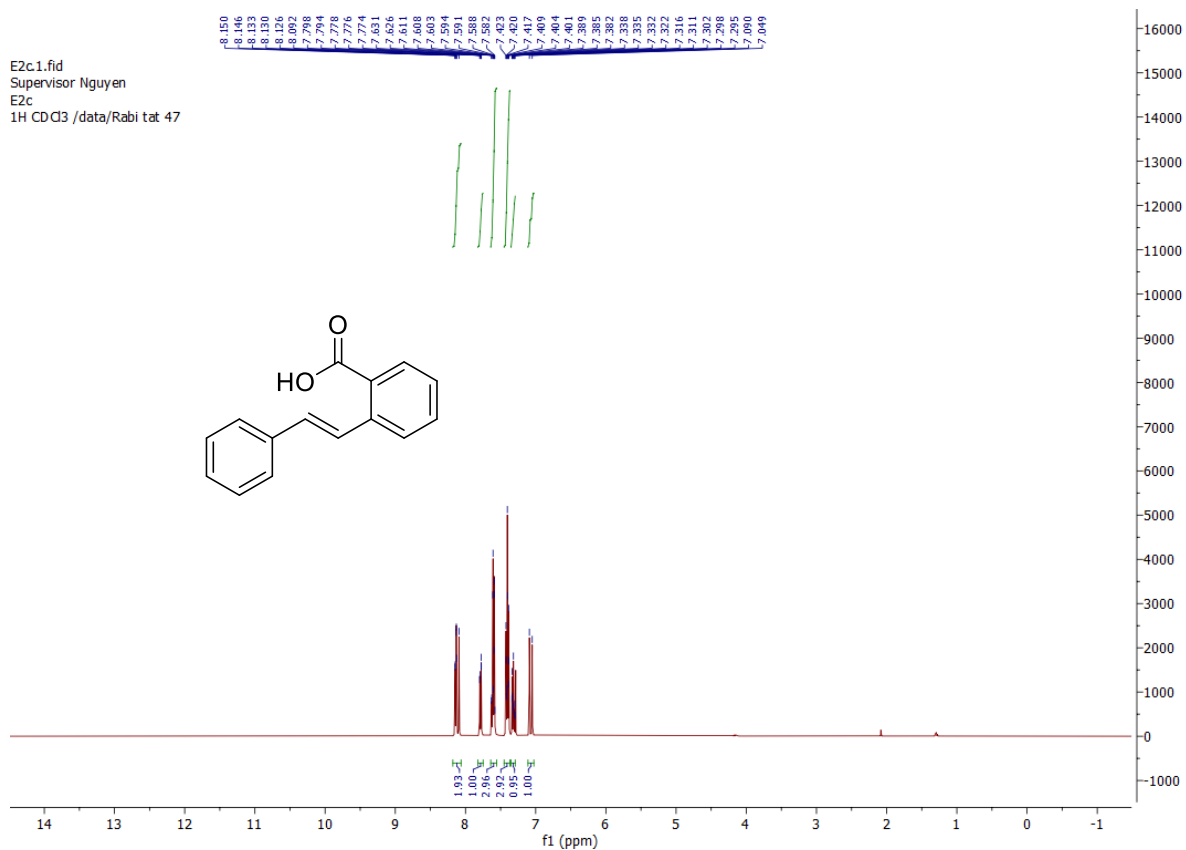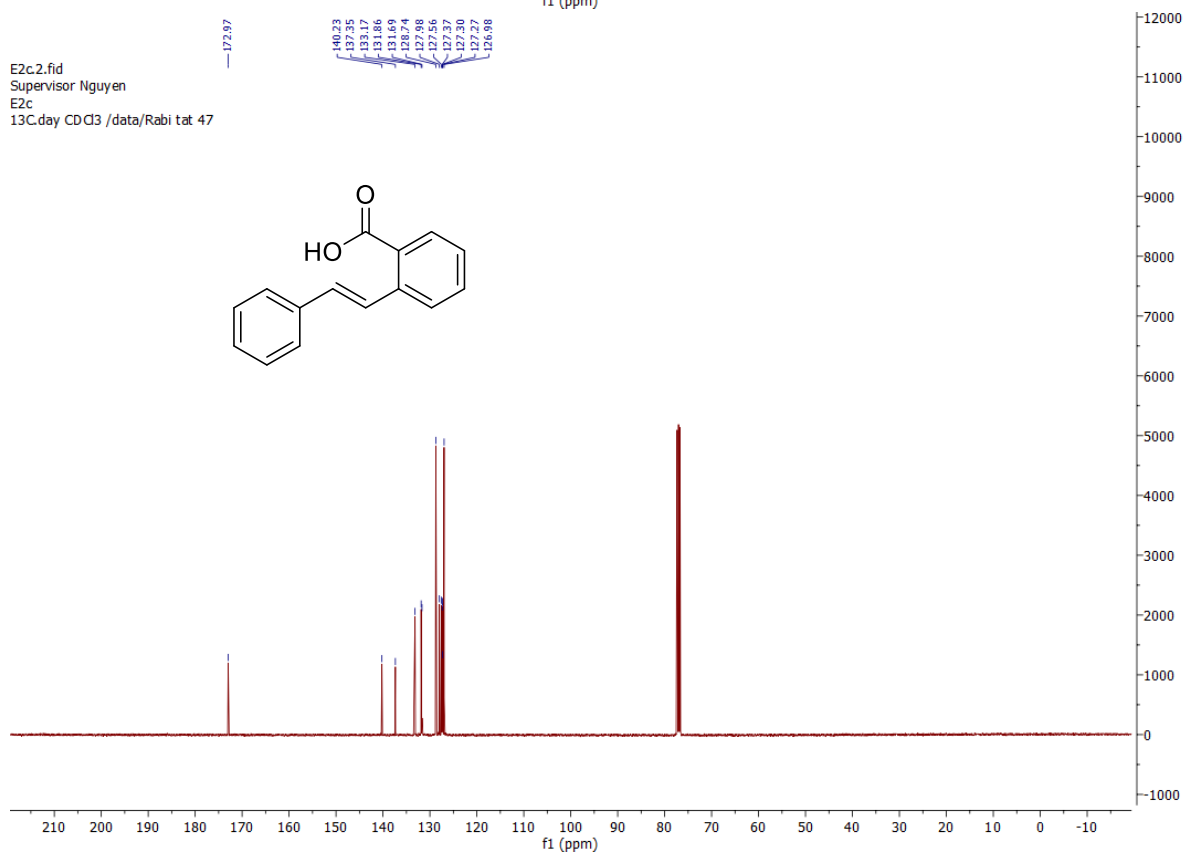

**(Z)-7-methyloct-5-enoic acid (1r):**  $^1\text{H}$  NMR (400 MHz) and  $^{13}\text{C}$  NMR (101 MHz,  $\text{CDCl}_3$ ).

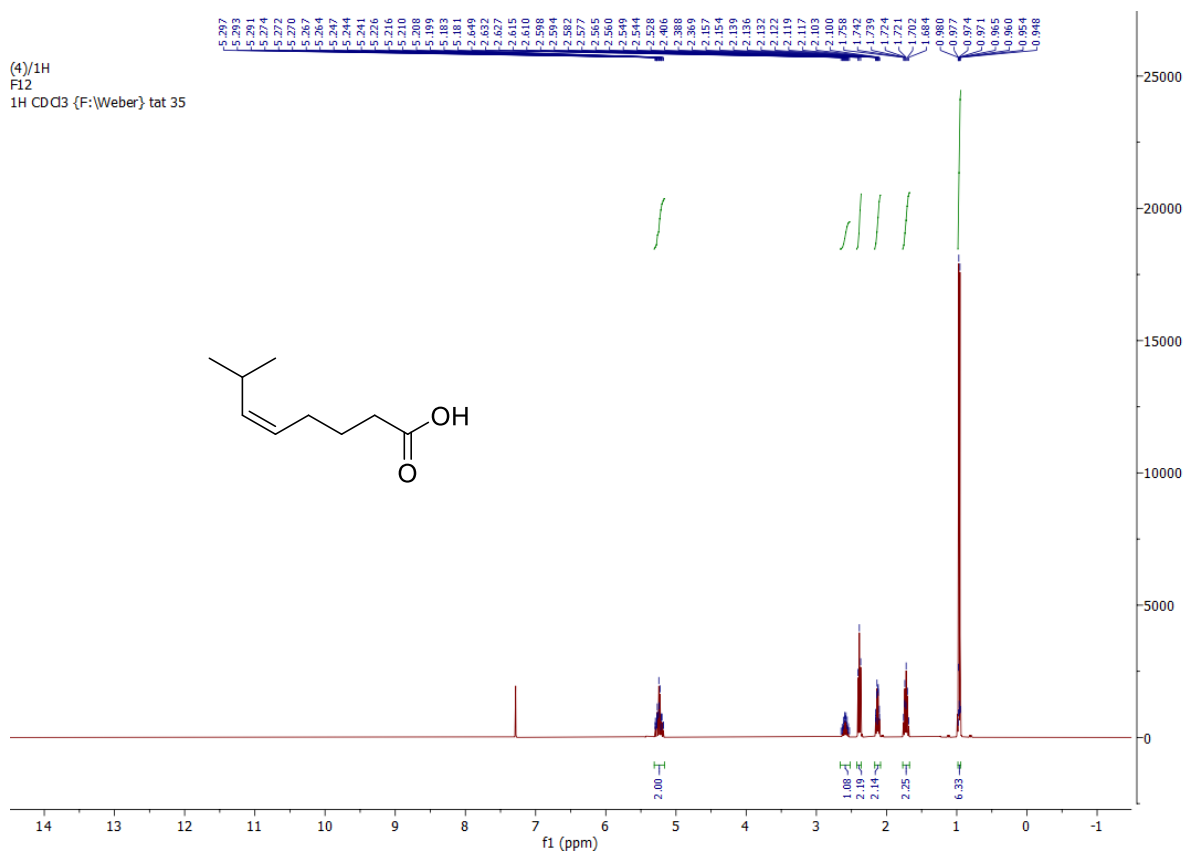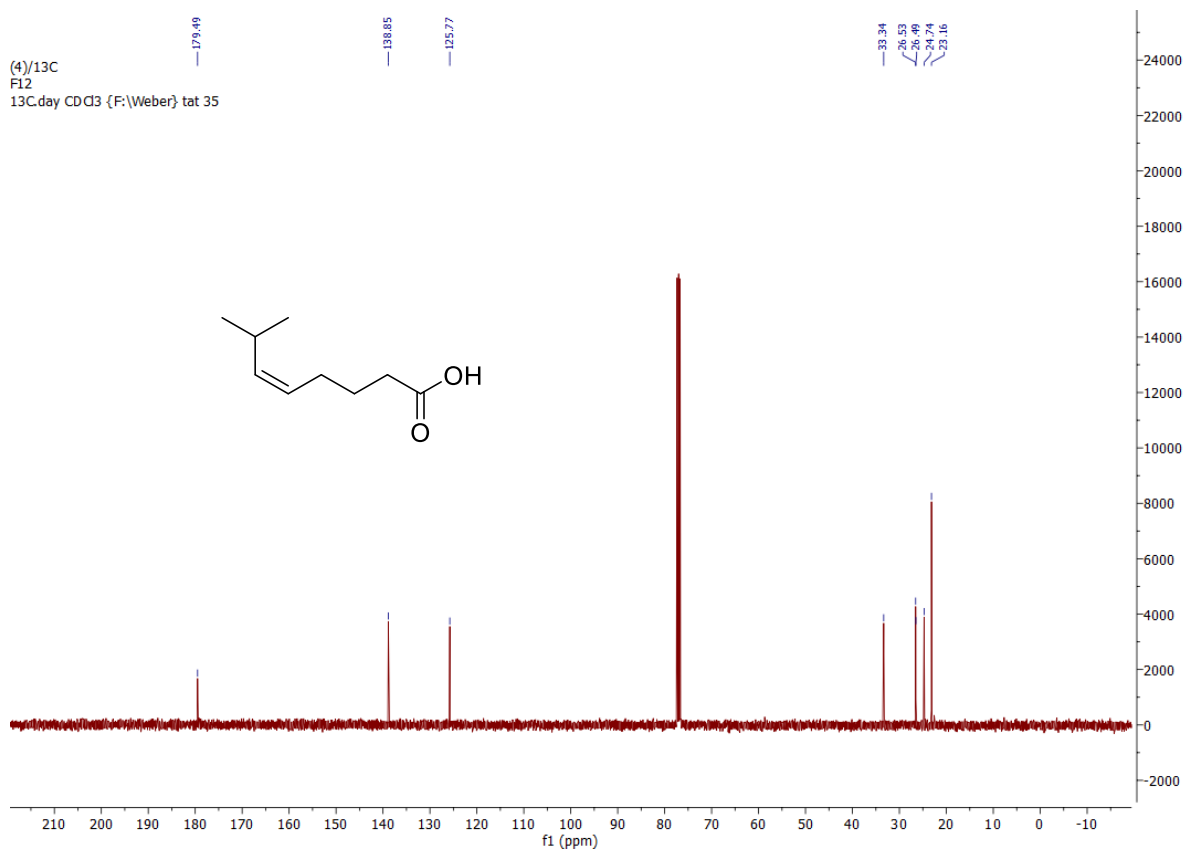

**(Z)-6-methylhept-4-enoic acid (1s):**  $^1\text{H}$  NMR (400 MHz) and  $^{13}\text{C}$  NMR (101 MHz,  $\text{CDCl}_3$ ).

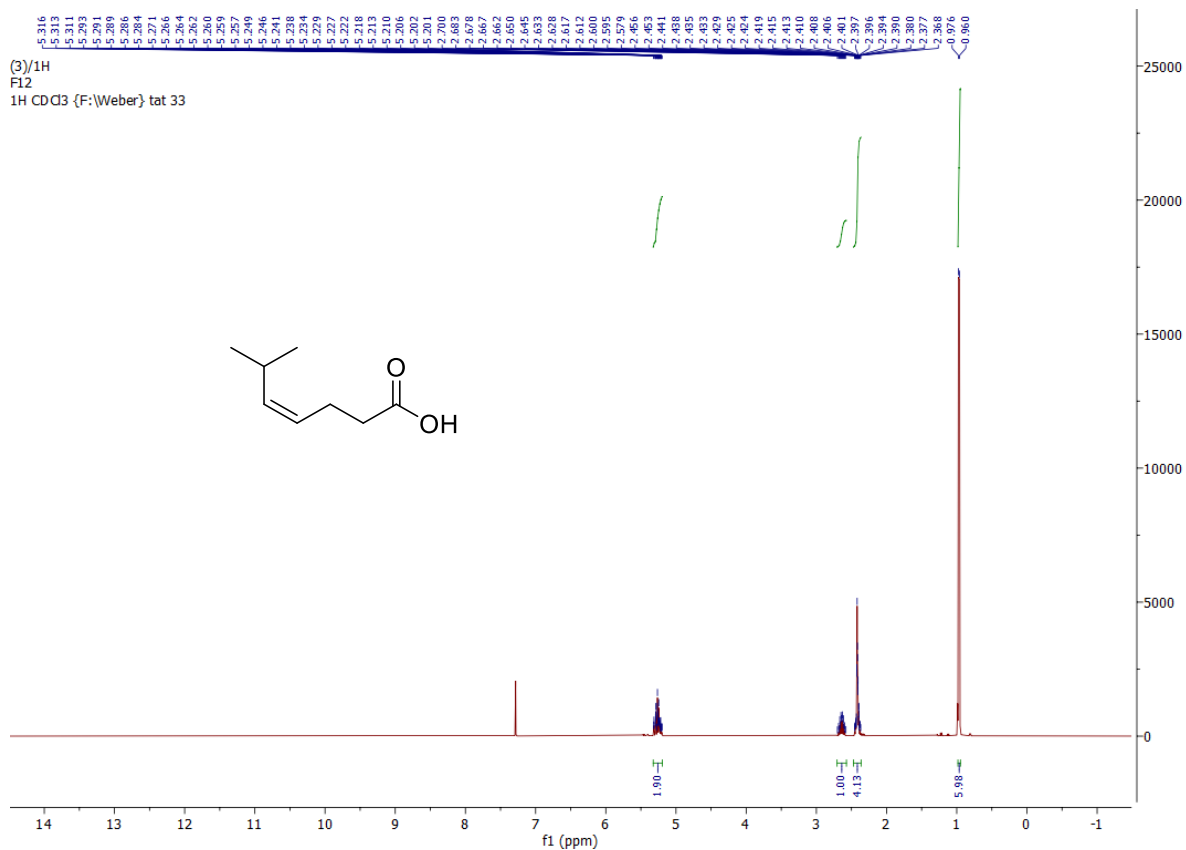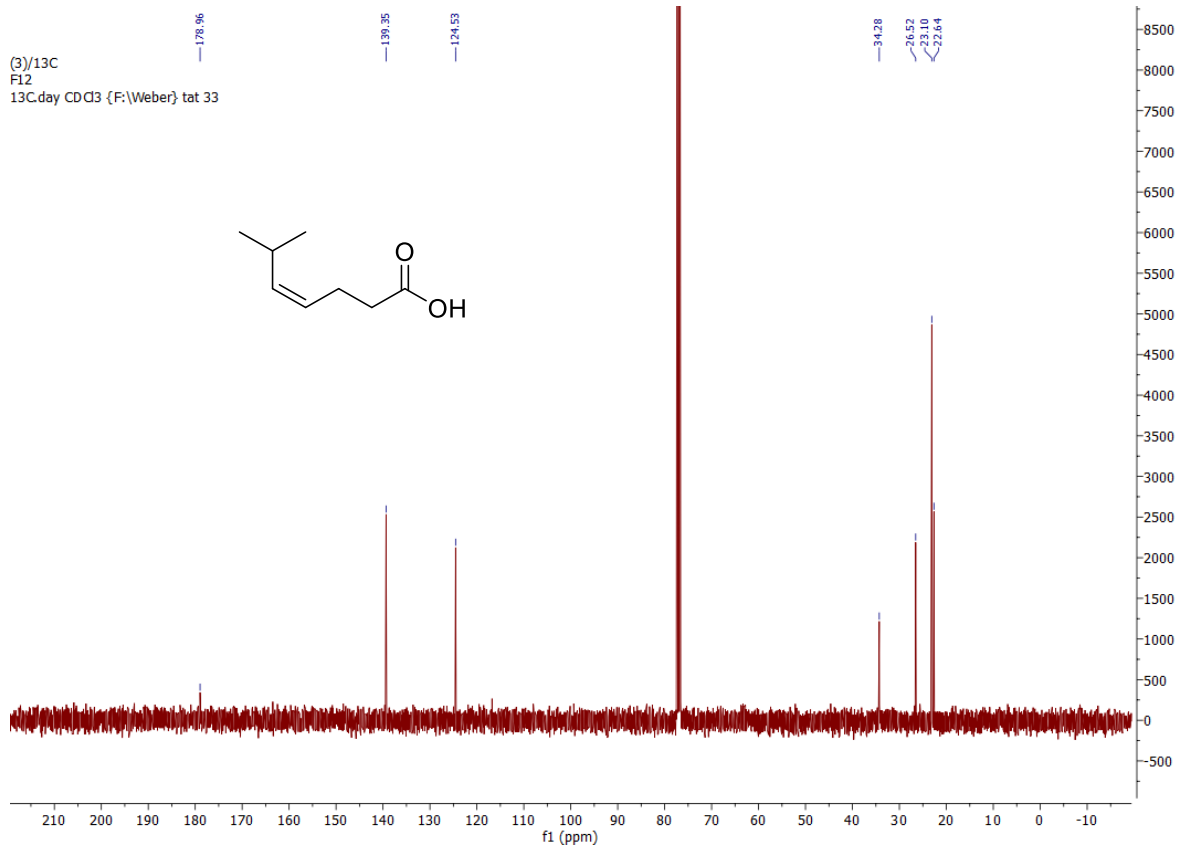

**(Z)-hex-4-enoic acid (1t):**  $^1\text{H}$  NMR (400 MHz) and  $^{13}\text{C}$  NMR (101 MHz,  $\text{CDCl}_3$ ).

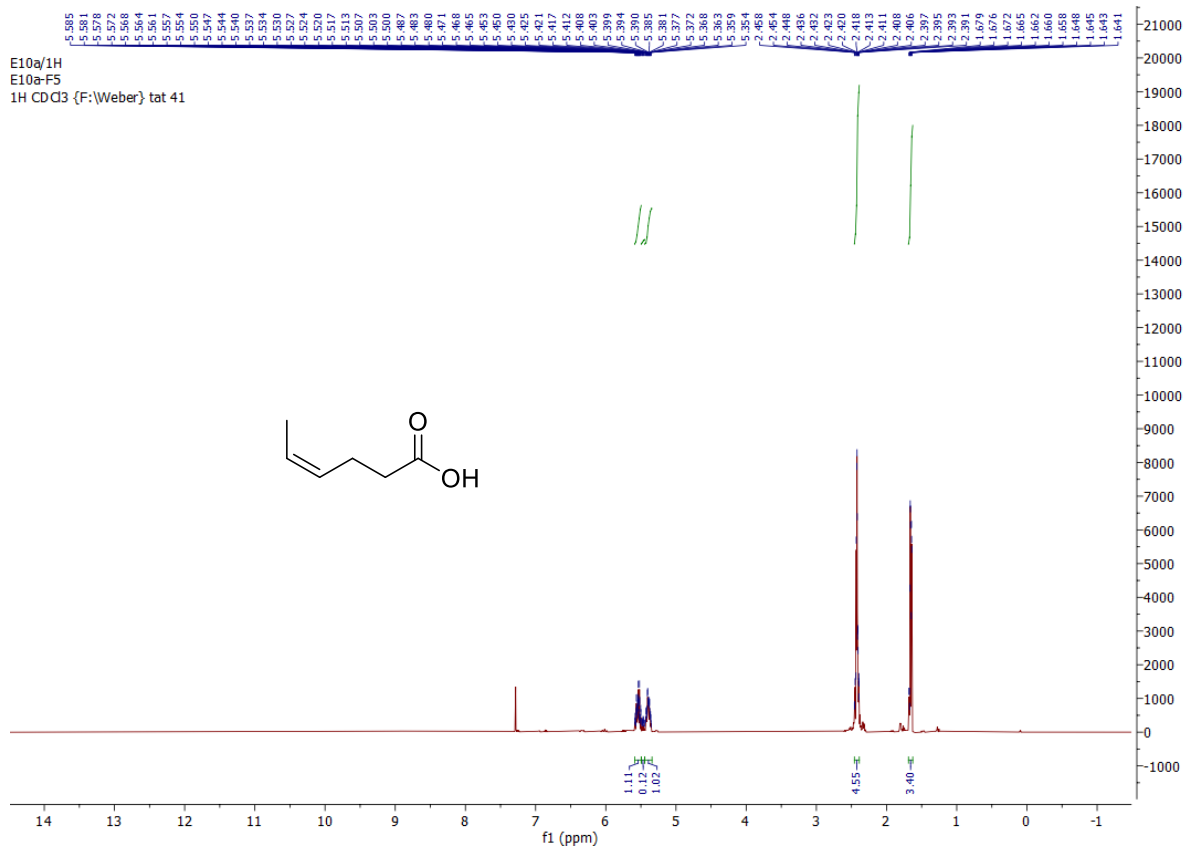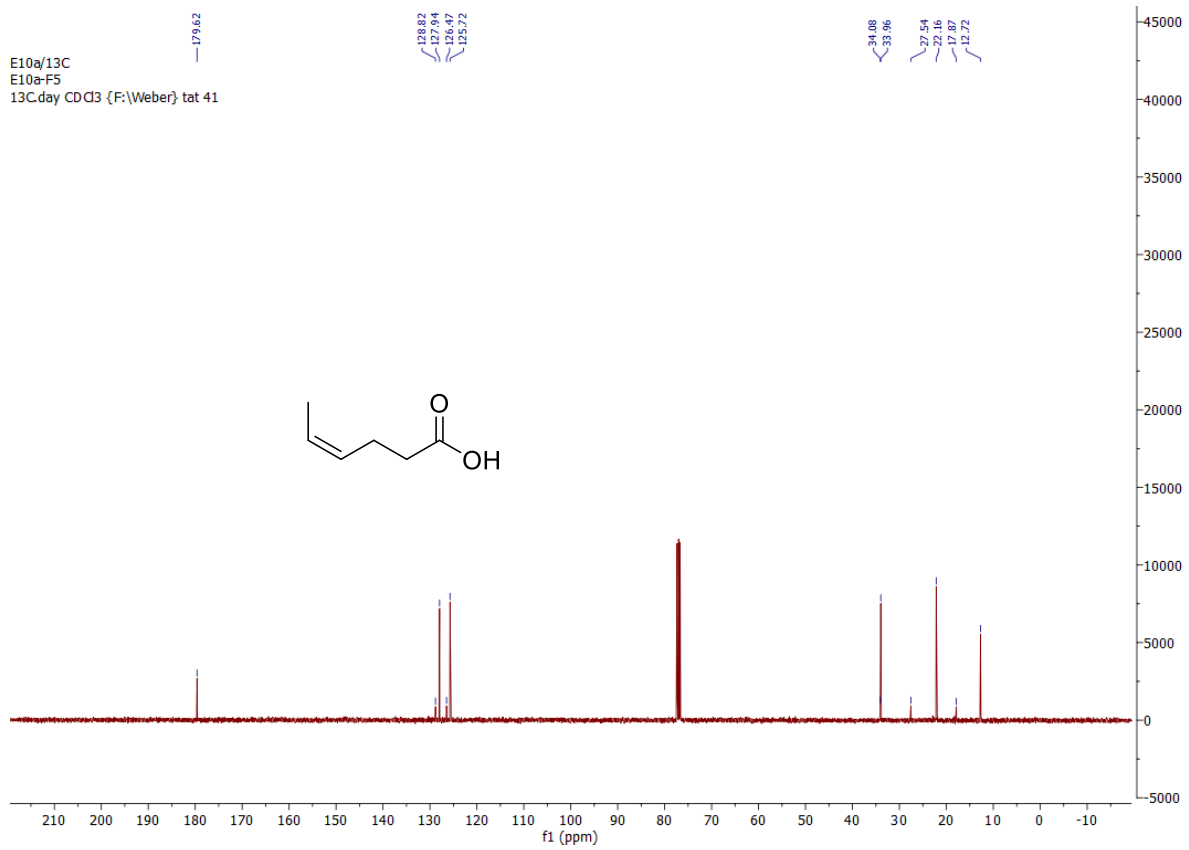



**6-bromo-7-(*p*-tolyl)oxepan-2-one (2b): <sup>1</sup>H NMR (400 MHz) and <sup>13</sup>C NMR (101 MHz, CDCl<sub>3</sub>)**

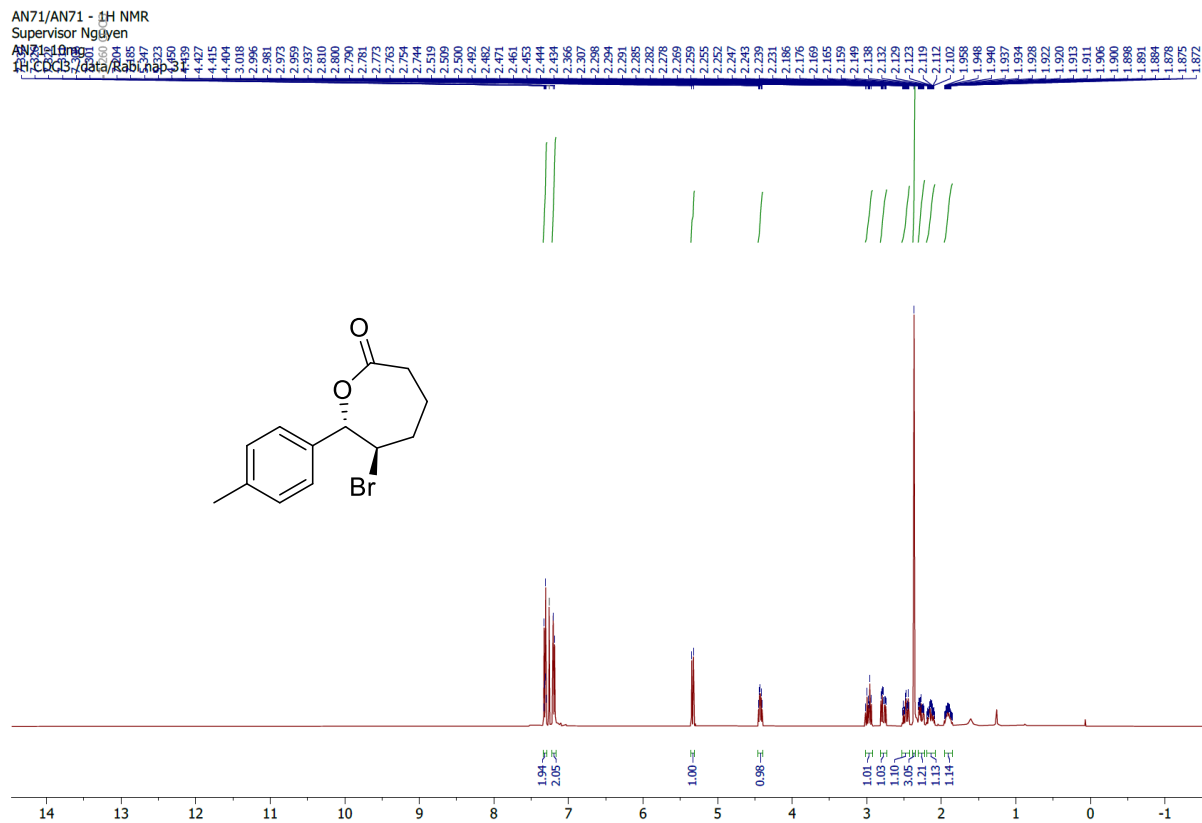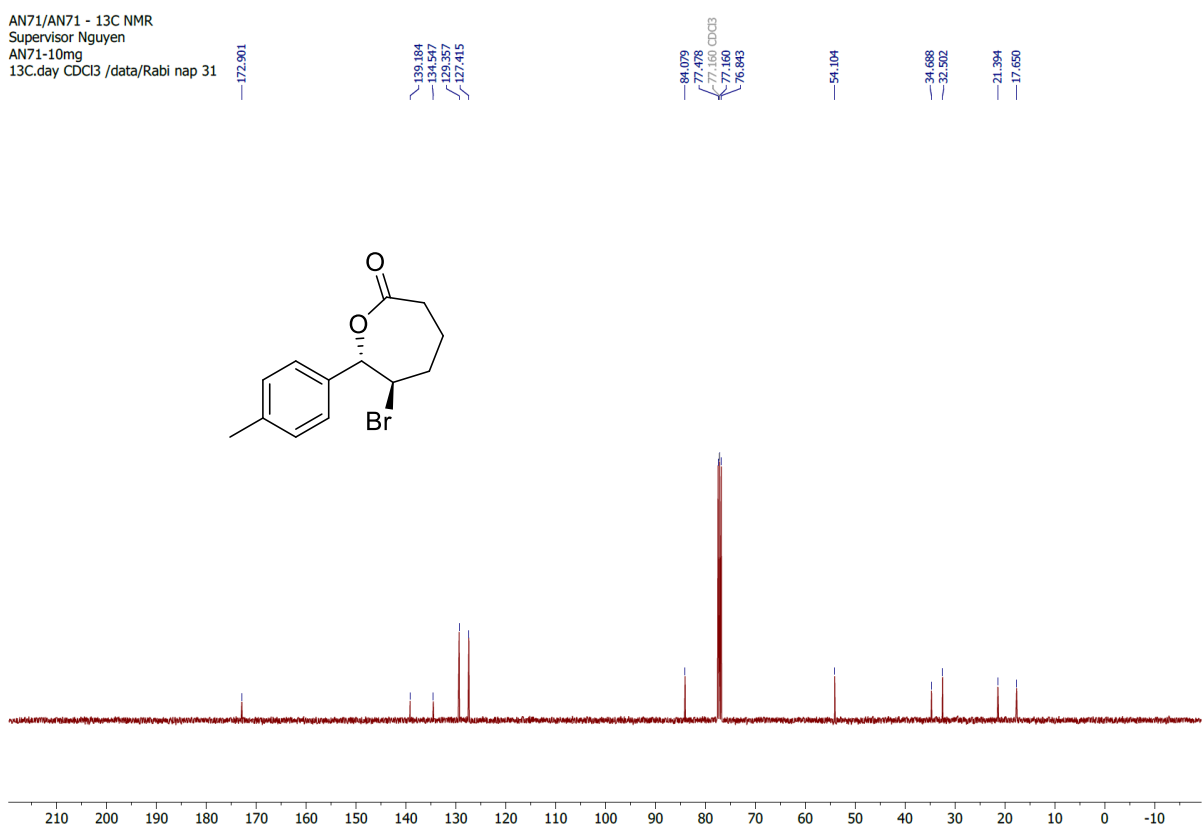

**6-bromo-7-(4-bromophenyl)oxepan-2-one (2c):  $^1\text{H}$  NMR (400 MHz) and  $^{13}\text{C}$  NMR (101 MHz,  $\text{CDCl}_3$ )**

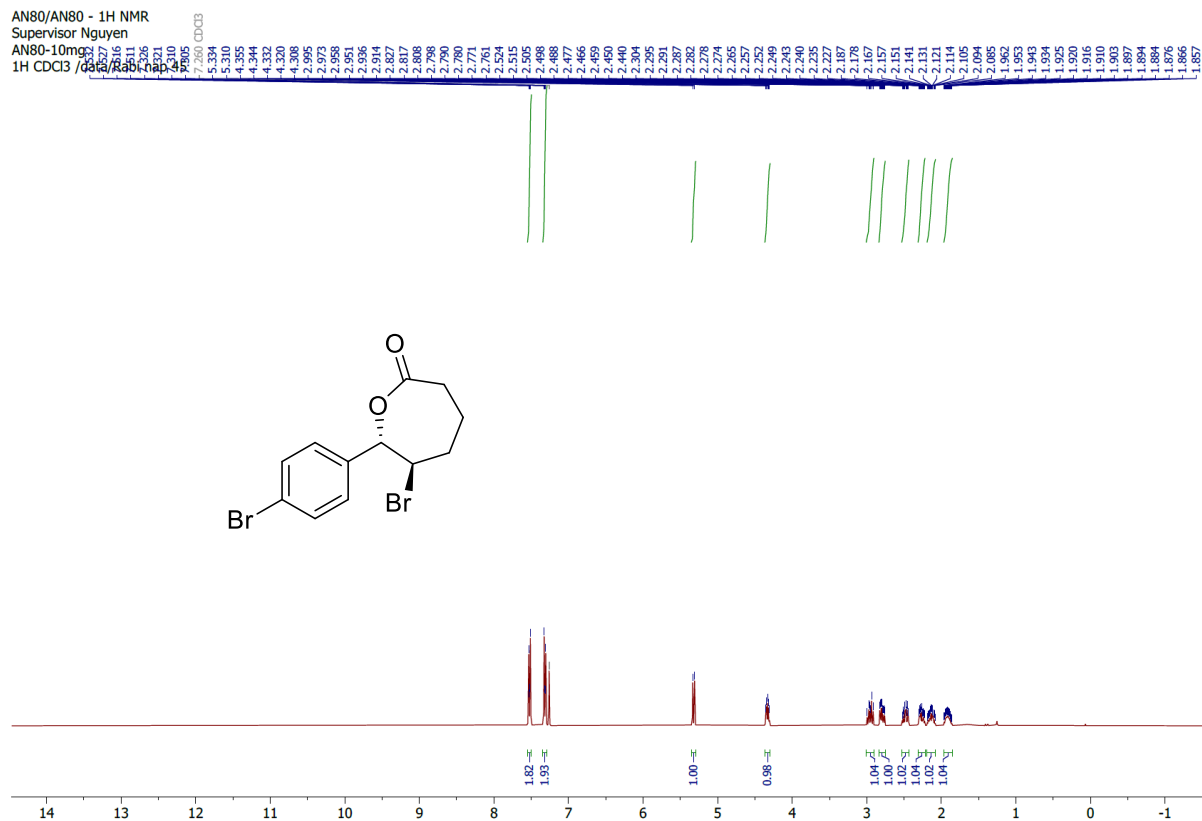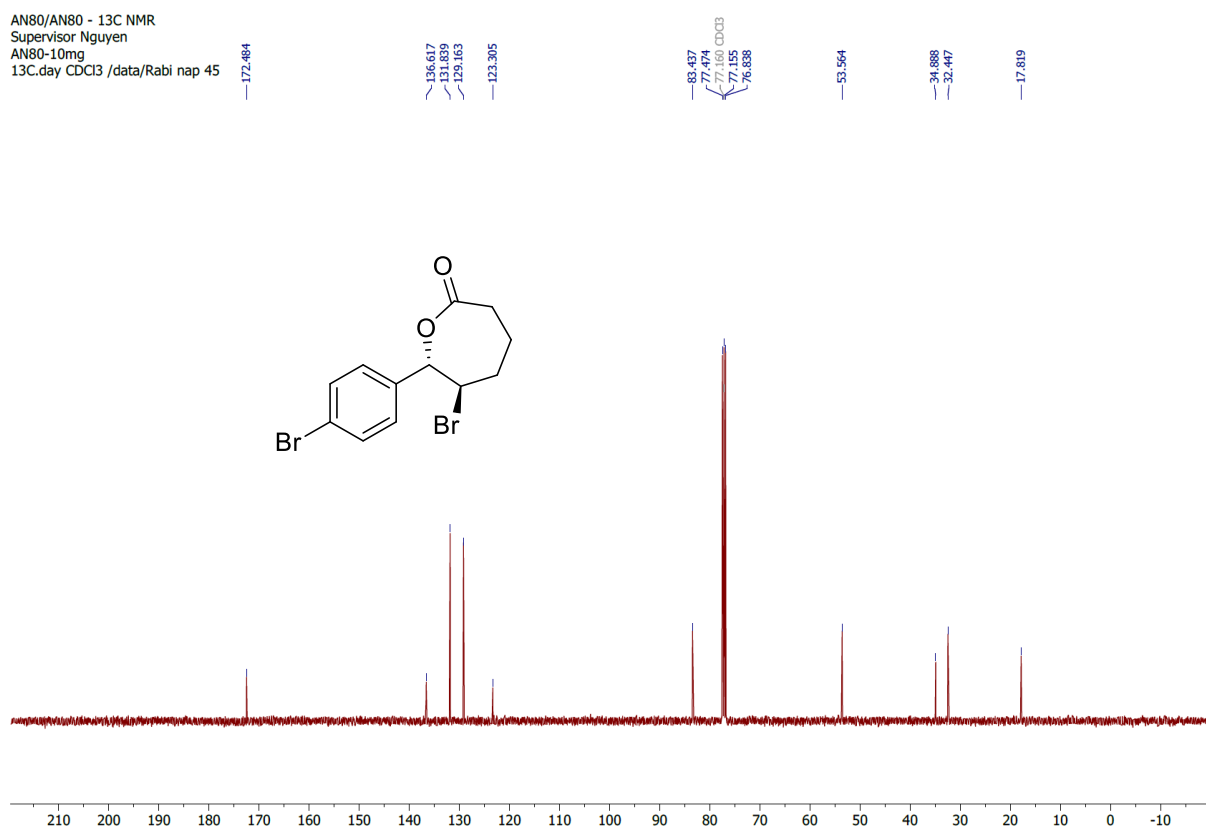





230524-nap.4.fid  
AN73  
11B CDCl3 {F:\Weber} nap 53

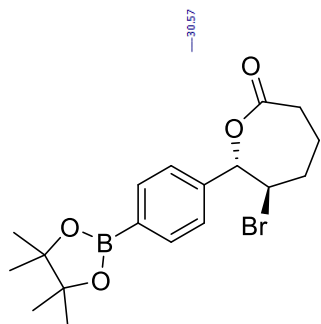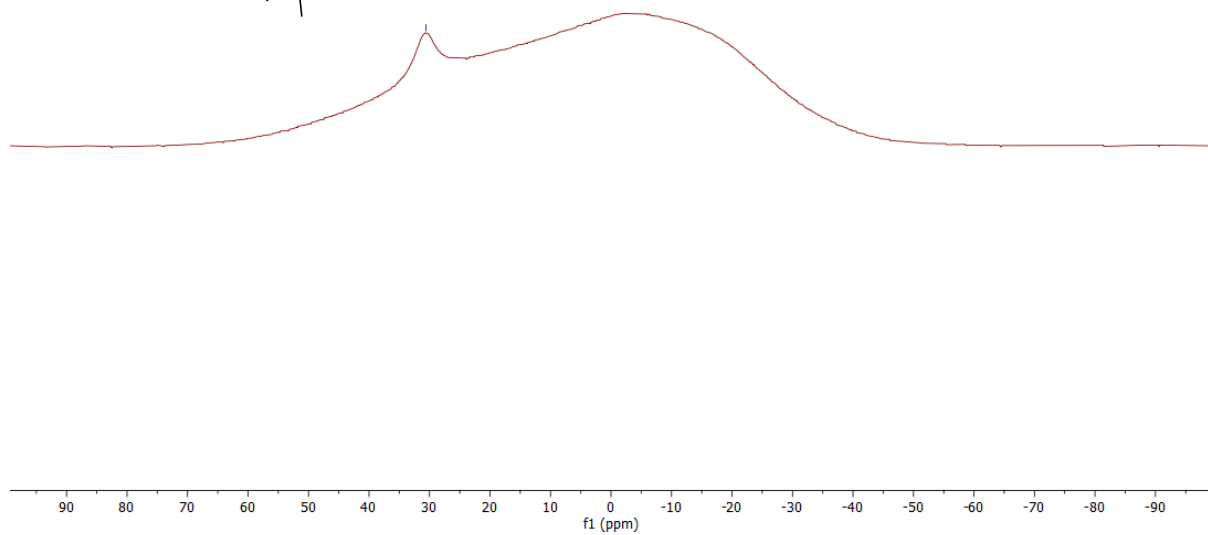

**Methyl 4-(3-bromo-7-oxooxepan-2-yl)benzoate (2e):  $^1\text{H}$  NMR (400 MHz) and  $^{13}\text{C}$  NMR (101 MHz,  $\text{CDCl}_3$ )**

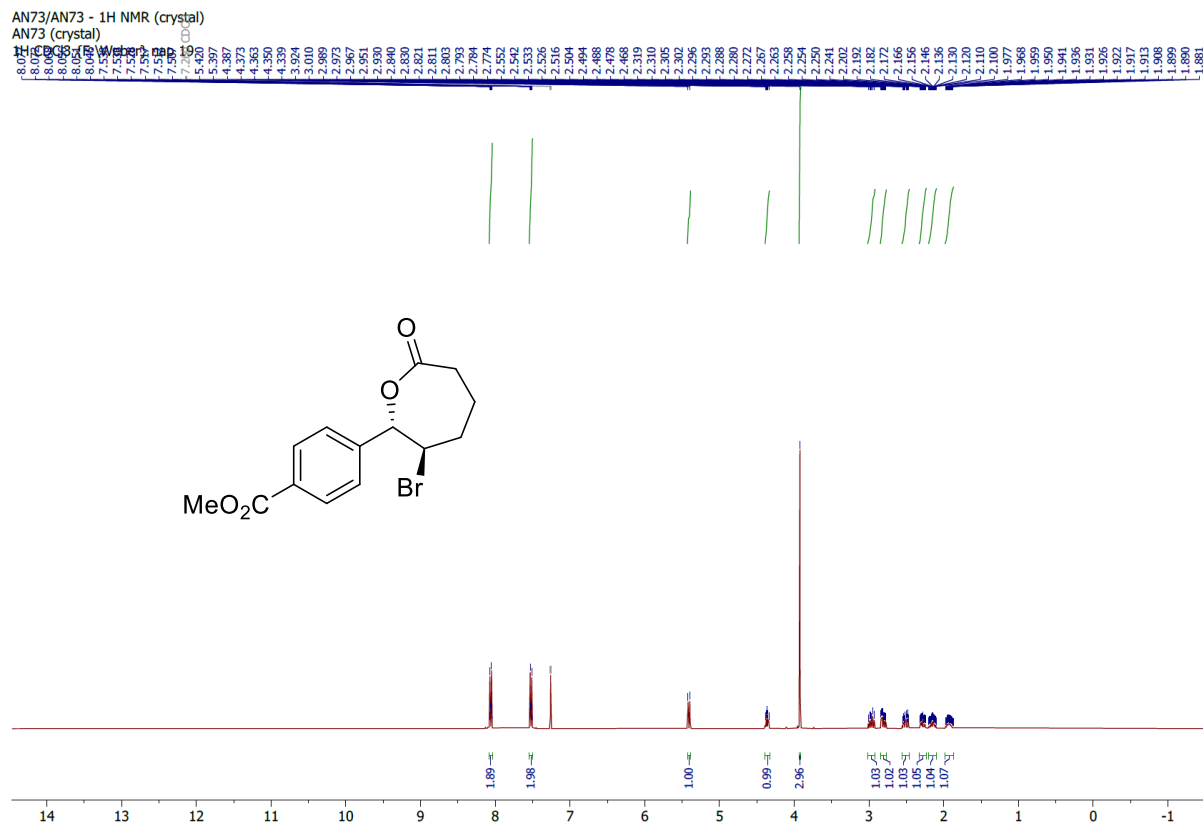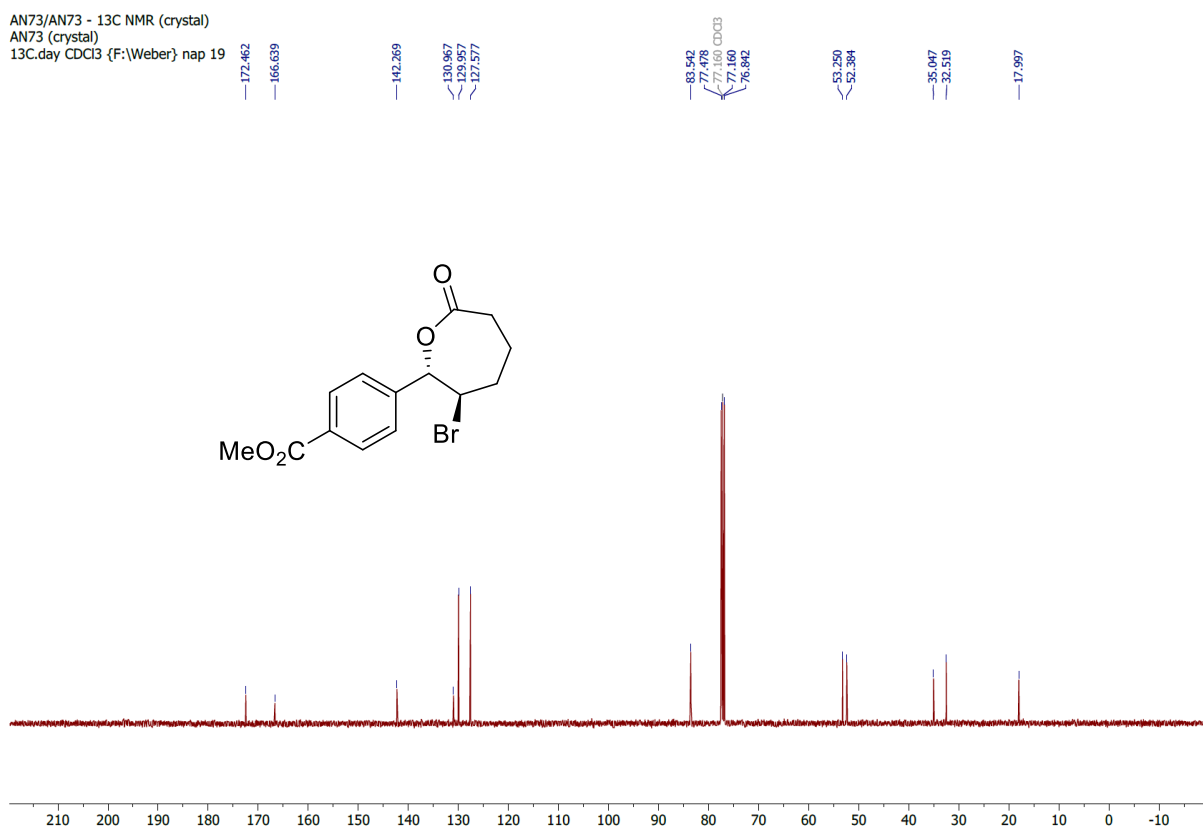

**6-bromo-7-(4-methoxyphenyl)oxepan-2-one (2f): <sup>1</sup>H NMR (400 MHz) and <sup>13</sup>C NMR (101 MHz, CDCl<sub>3</sub>)**

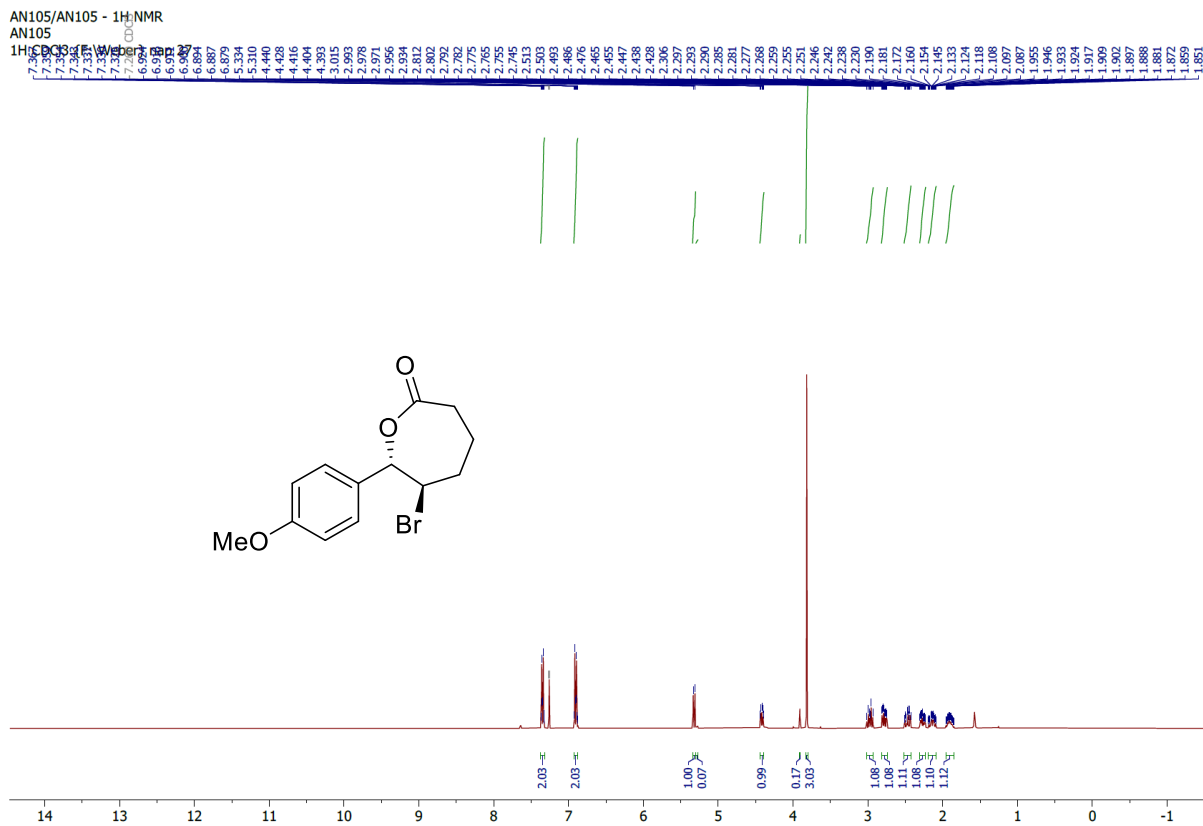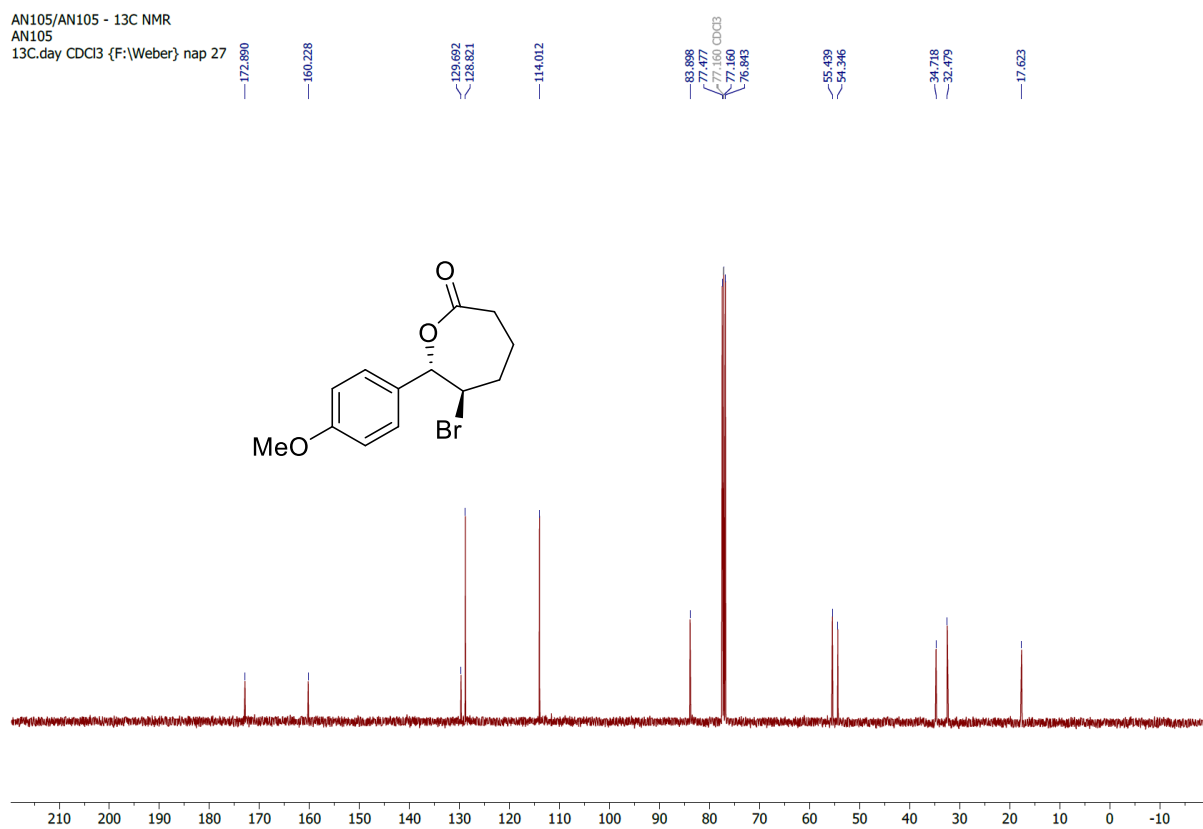



**6-bromo-7-(naphthalen-2-yl)oxepan-2-one (2h): <sup>1</sup>H NMR (400 MHz) and <sup>13</sup>C NMR (101 MHz, CDCl<sub>3</sub>)**

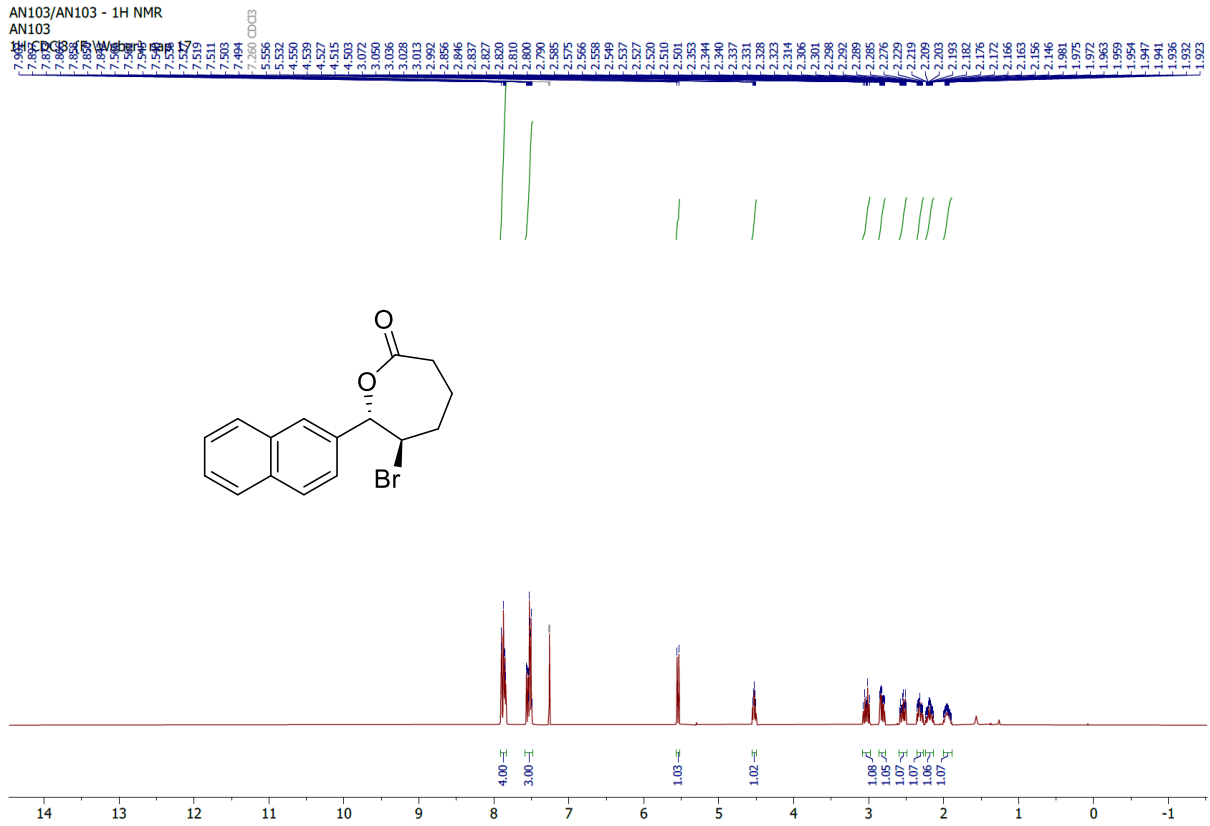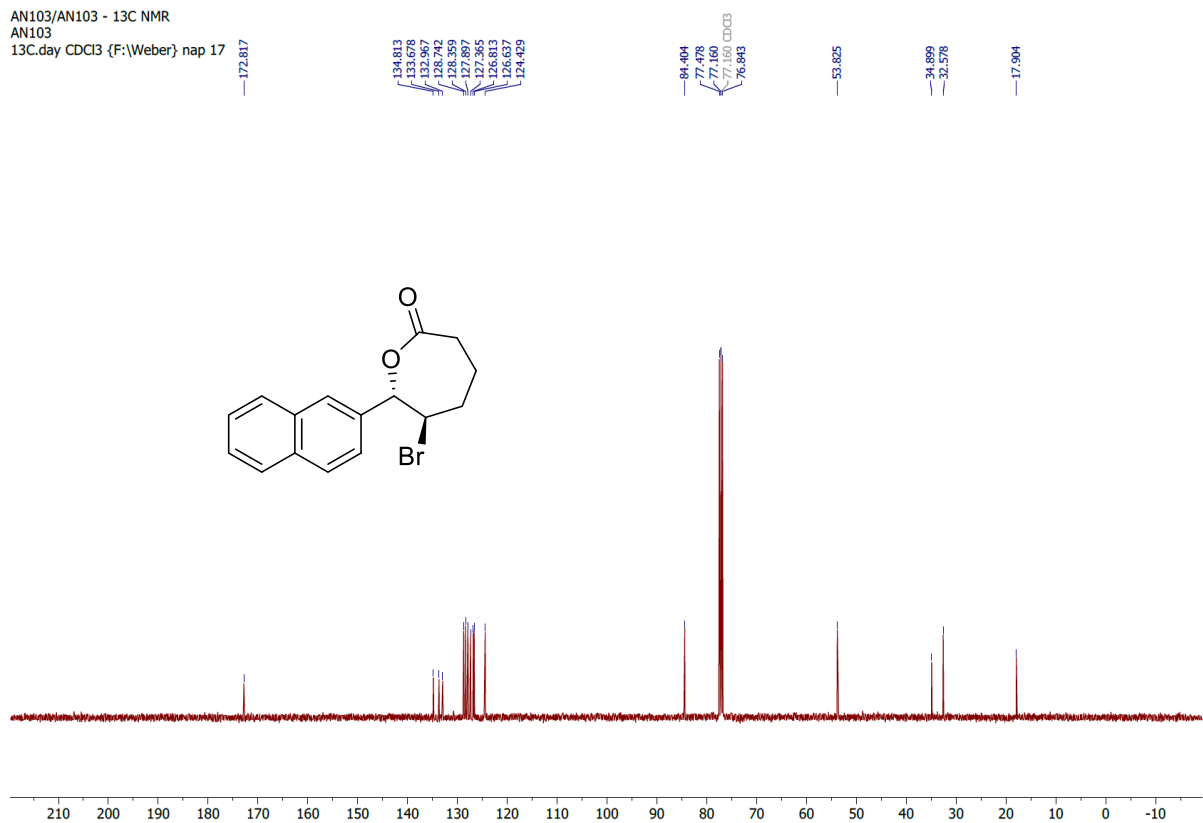

**6-bromo-7-(naphthalen-1-yl)oxepan-2-one (2i):**  $^1\text{H}$  NMR (400 MHz) and  $^{13}\text{C}$  NMR (101 MHz,  $\text{CDCl}_3$ )

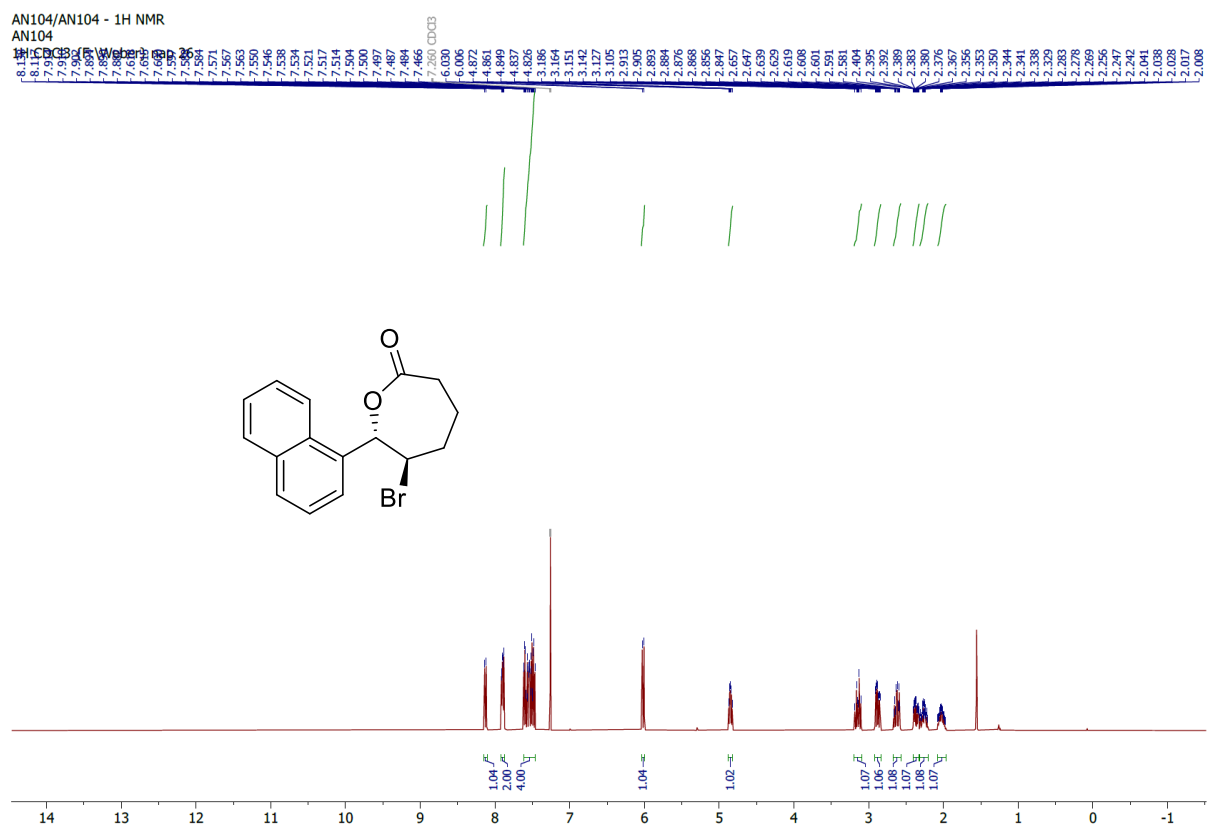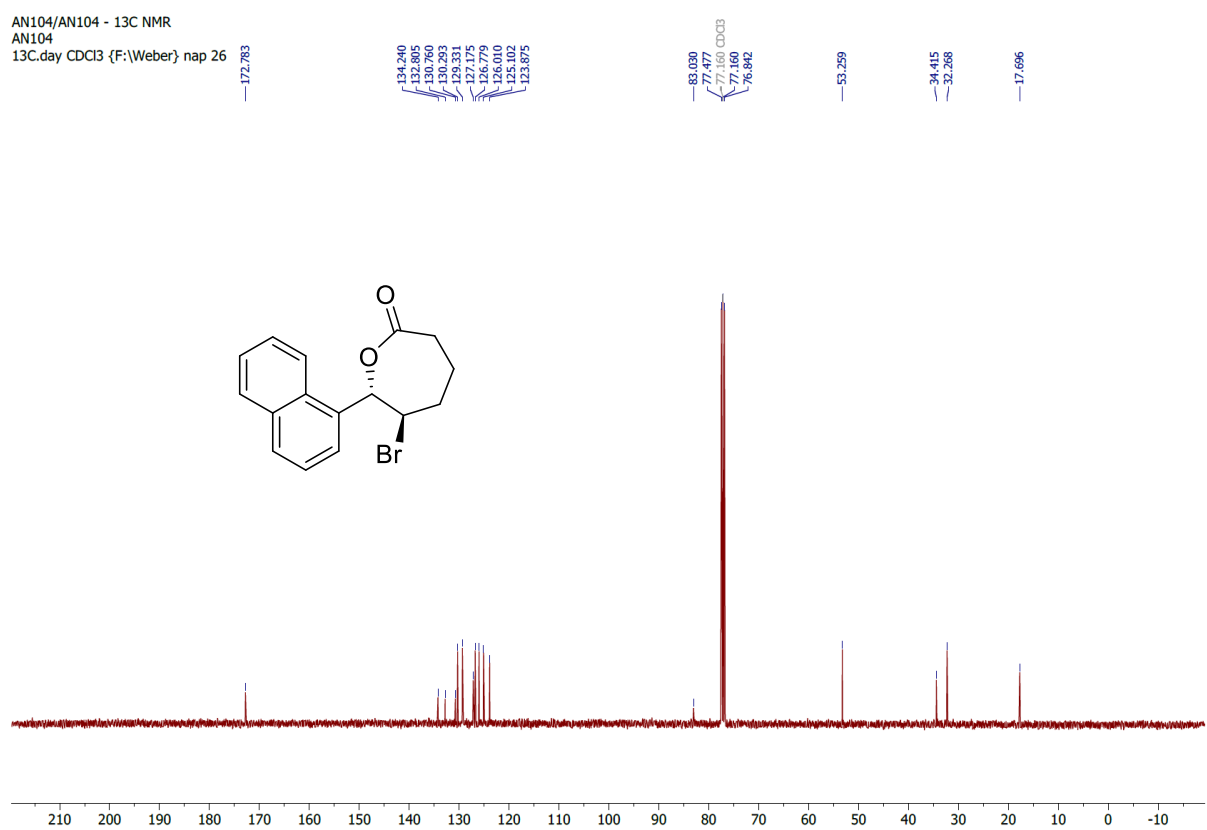

**6-bromo-3,3-dimethyl-7-phenyloxepan-2-one (2j):  $^1\text{H}$  NMR (400 MHz) and  $^{13}\text{C}$  NMR (101 MHz,  $\text{CDCl}_3$ )**

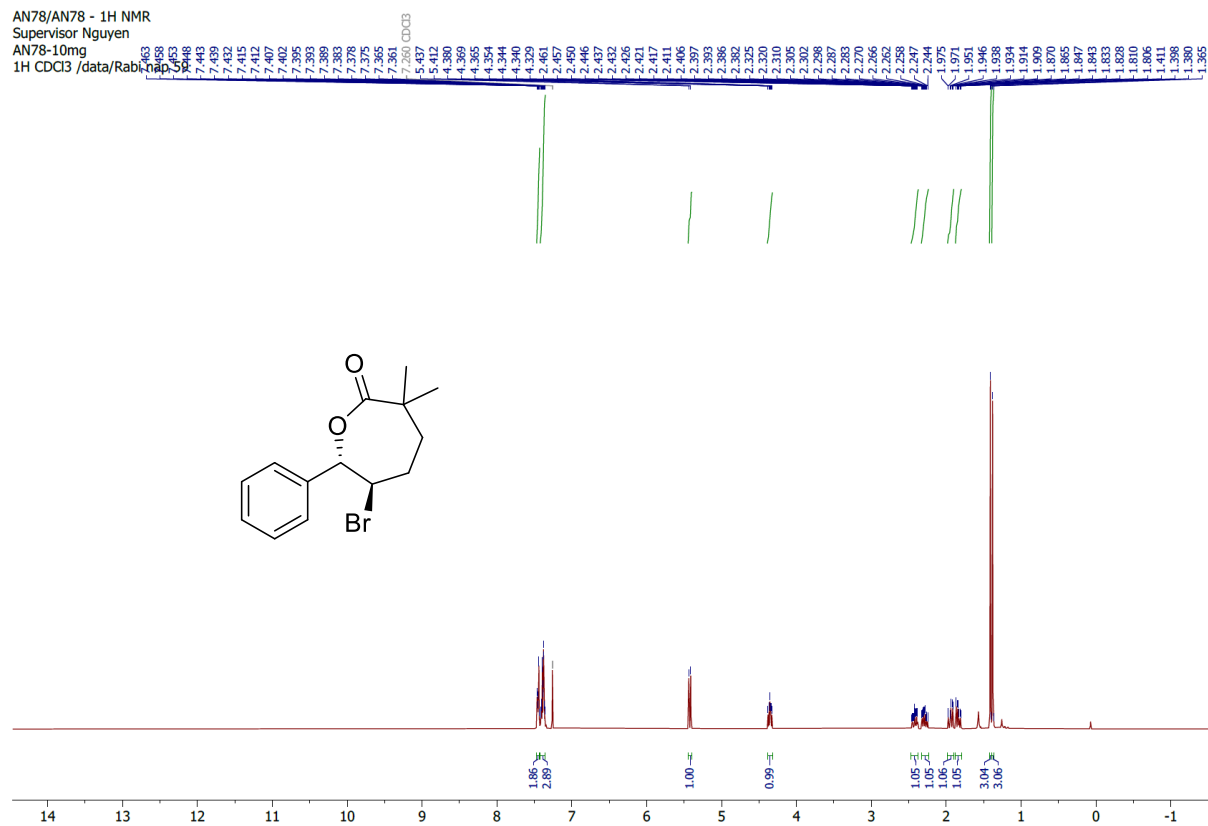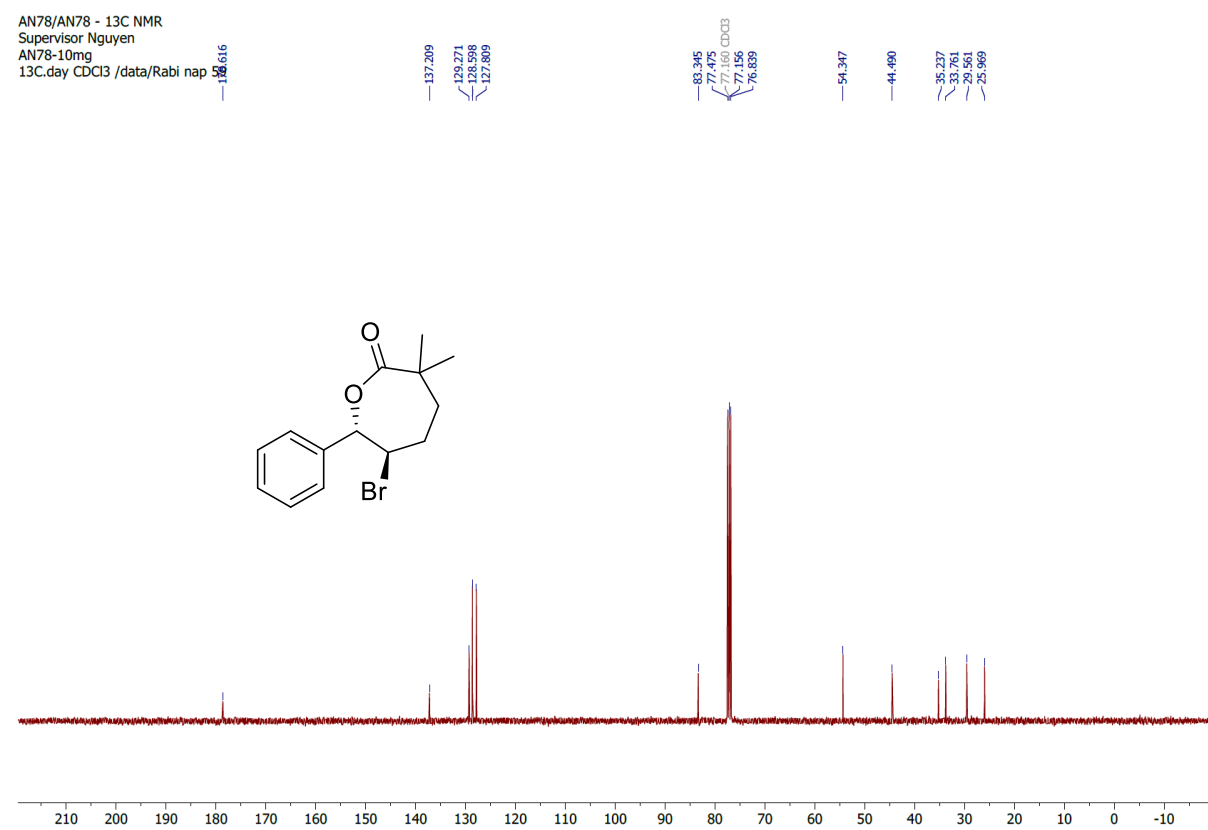

**6-bromo-7-(thiophen-2-yl)oxepan-2-one (2k):  $^1\text{H}$  NMR (400 MHz) and  $^{13}\text{C}$  NMR (101 MHz,  $\text{CDCl}_3$ )**

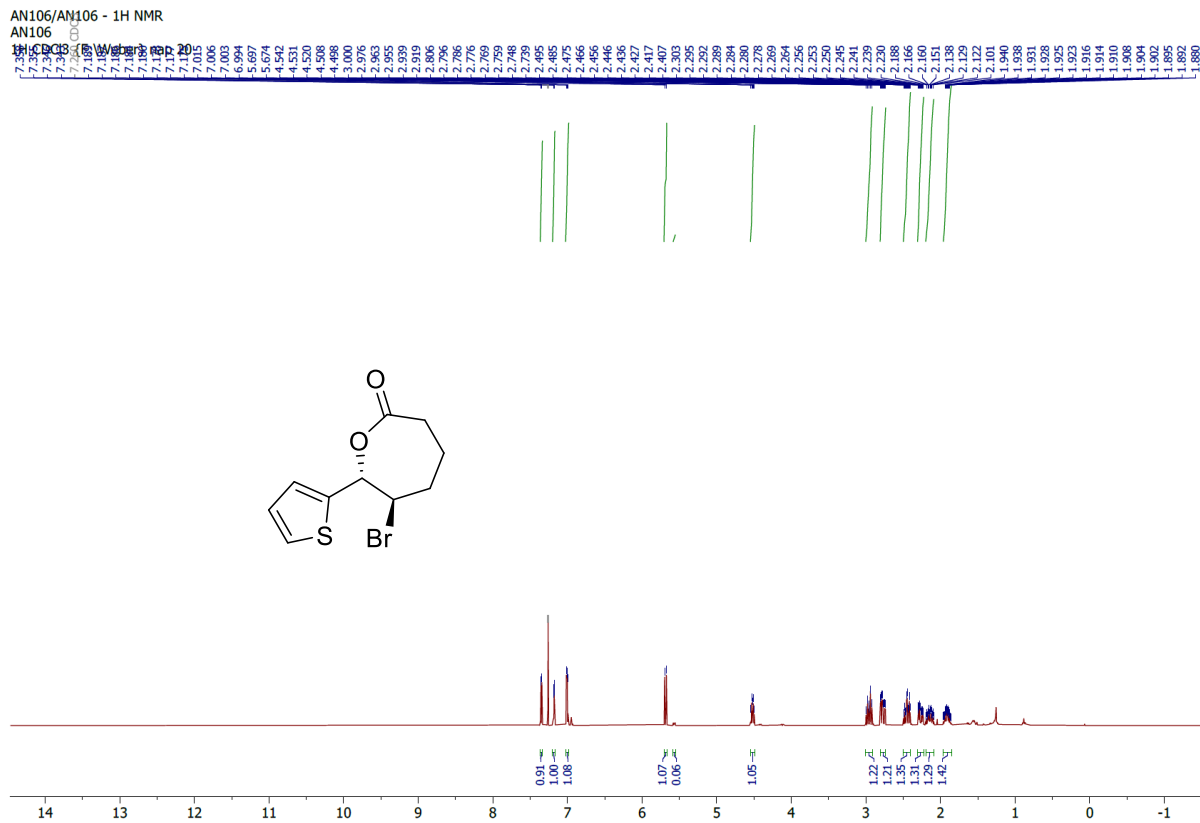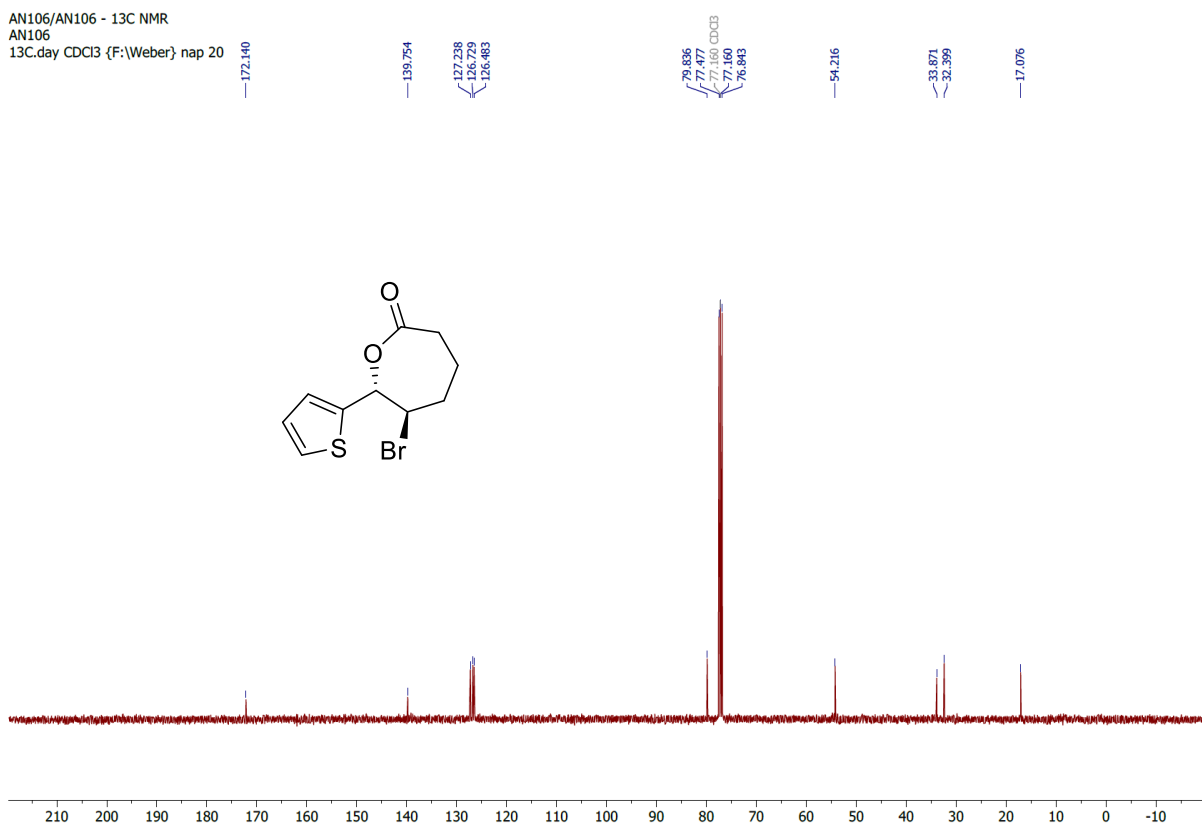



# 5-bromo-6-phenyltetrahydro-2H-pyran-2-one (2l): <sup>1</sup>H NMR (400 MHz) and <sup>13</sup>C NMR (101 MHz, CDCl<sub>3</sub>)

AN101/AN101 - 1H NMR  
AN101-10mg  
1H CDCl<sub>3</sub> {F:\Weber} nap 9

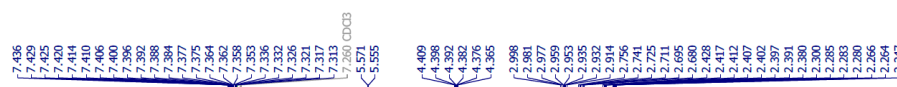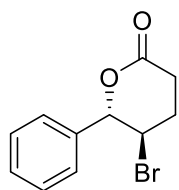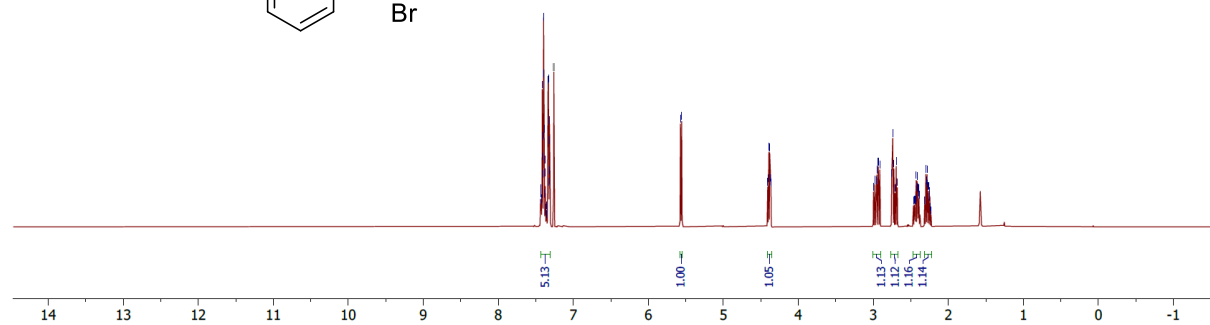

AN101/AN101 - 13C NMR  
AN101-10mg  
13C.day CDCl<sub>3</sub> {F:\Weber} nap 9

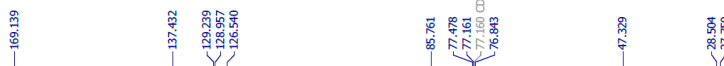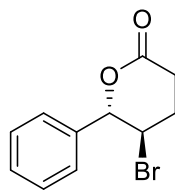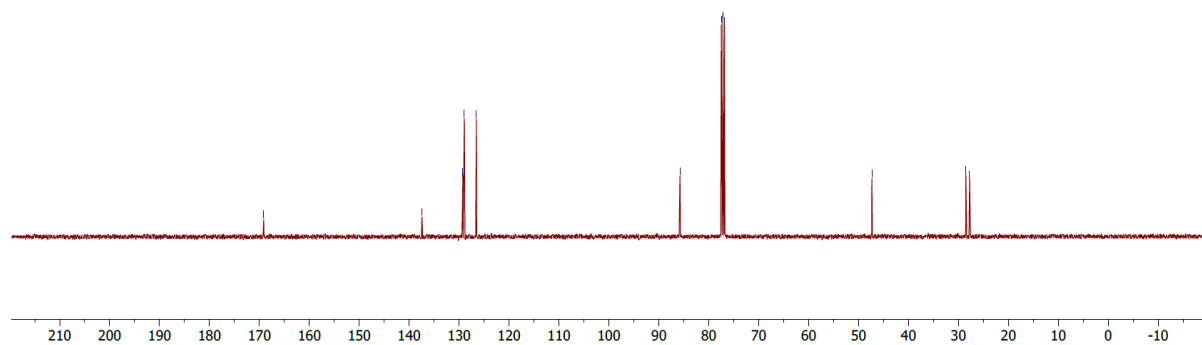



**7-bromo-3,3-dimethyl-8-phenyloxocan-2-one (2n):  $^1\text{H}$  NMR (400 MHz) and  $^{13}\text{C}$  NMR (101 MHz,  $\text{CDCl}_3$ )**

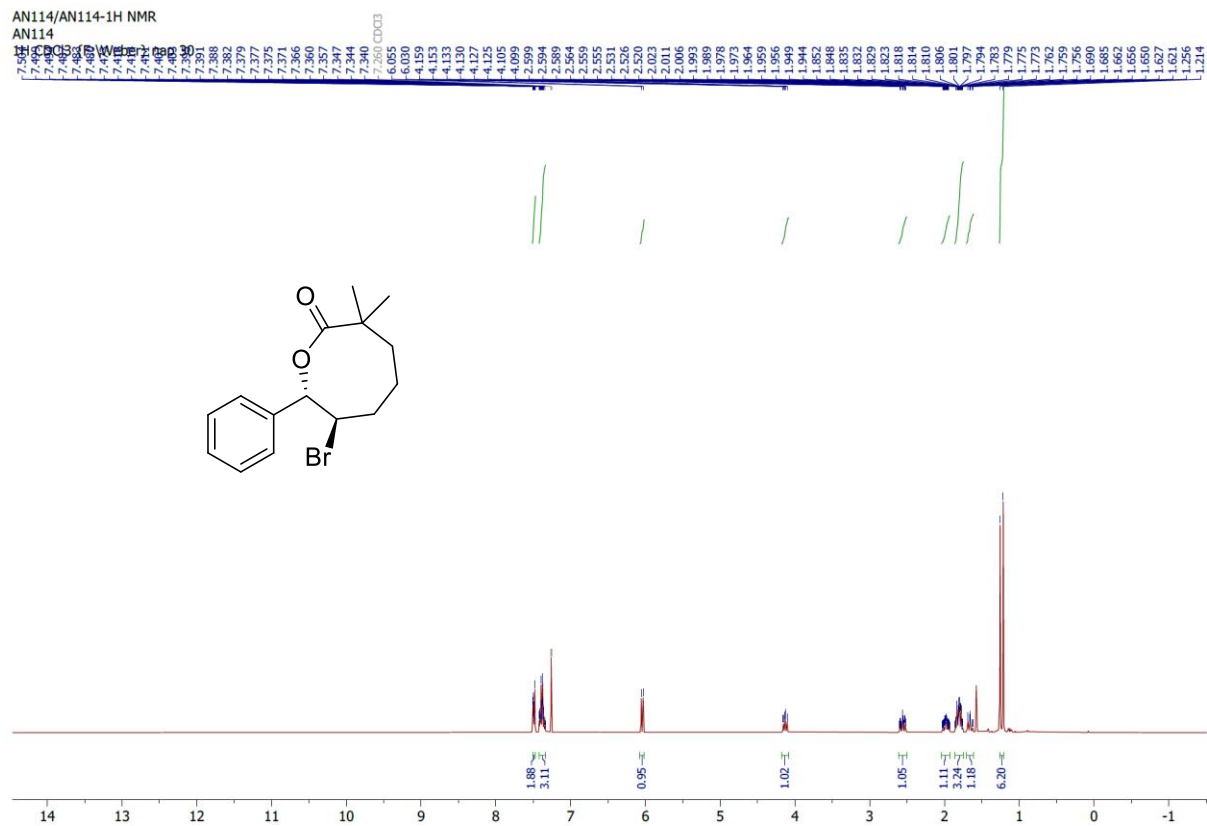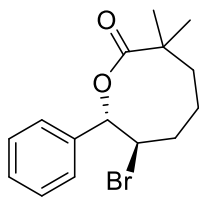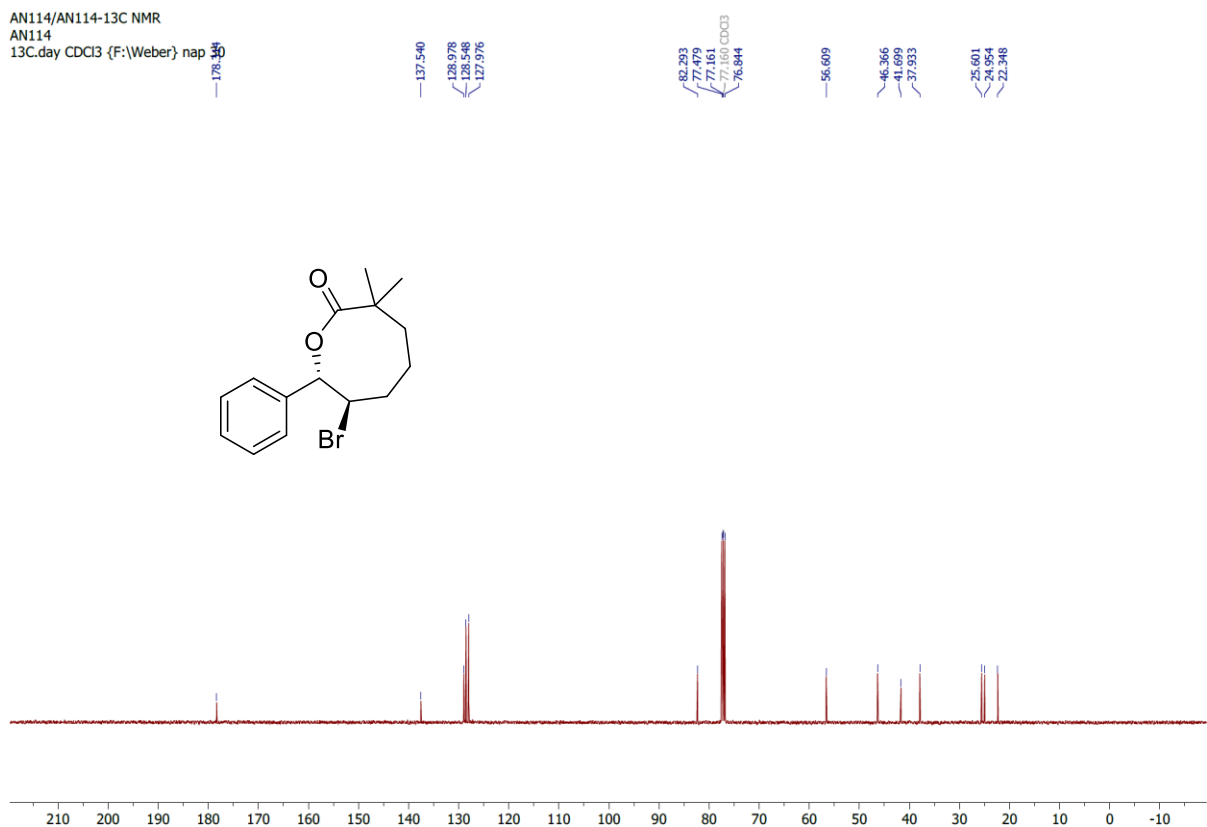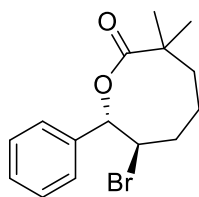

**(5a*S*,5b*R*,11b*S*,13a*S*)-4-bromo-3-(4-bromophenyl)-13a-methyl-1-oxo-1,3,4,5,5a,5b,6,7,11b,12,13,13a-dodecahydrophenanthro[2,1-*c*]oxepin-9-yl trifluoromethanesulfonate (**2o**): <sup>1</sup>H NMR (400 MHz), <sup>13</sup>C NMR (101 MHz, CDCl<sub>3</sub>) and <sup>19</sup>F NMR (376 MHz, CDCl<sub>3</sub>)**

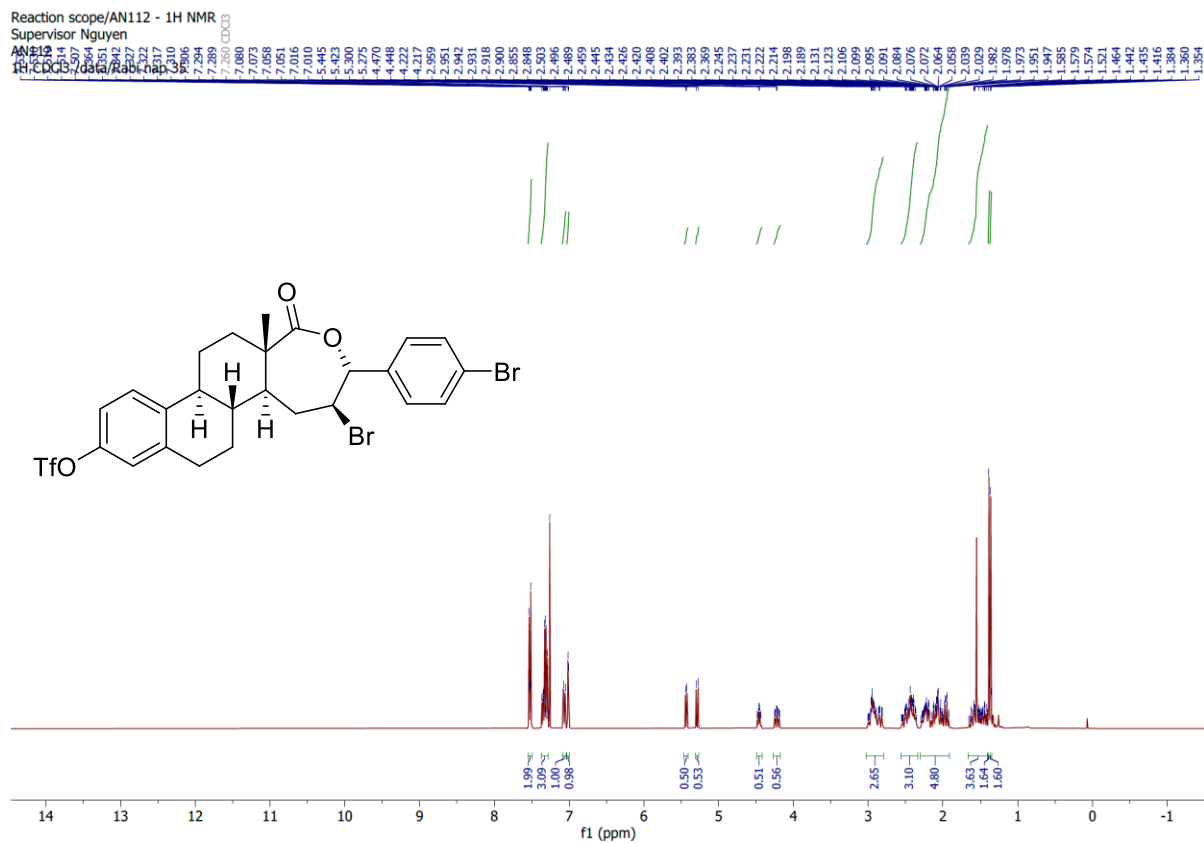

Reaction scope/AN112-13C NMR  
 Supervisor Nguyen  
 AN112  
 13C.night CDCl3 /data/Rabi nap

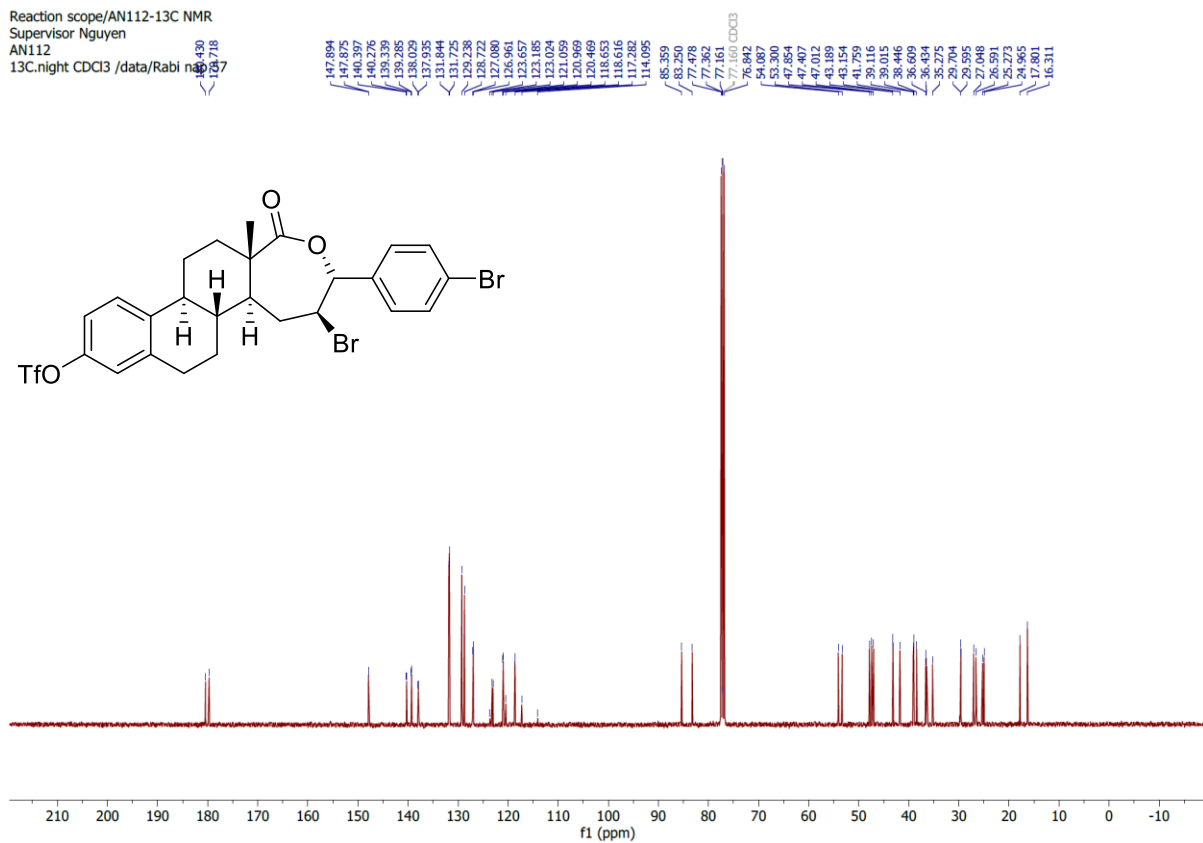

Reaction scope/AN112 - 19F  
 Supervisor Nguyen  
 AN112  
 19F{1H} CDCl3 /data/Rabi nap 35

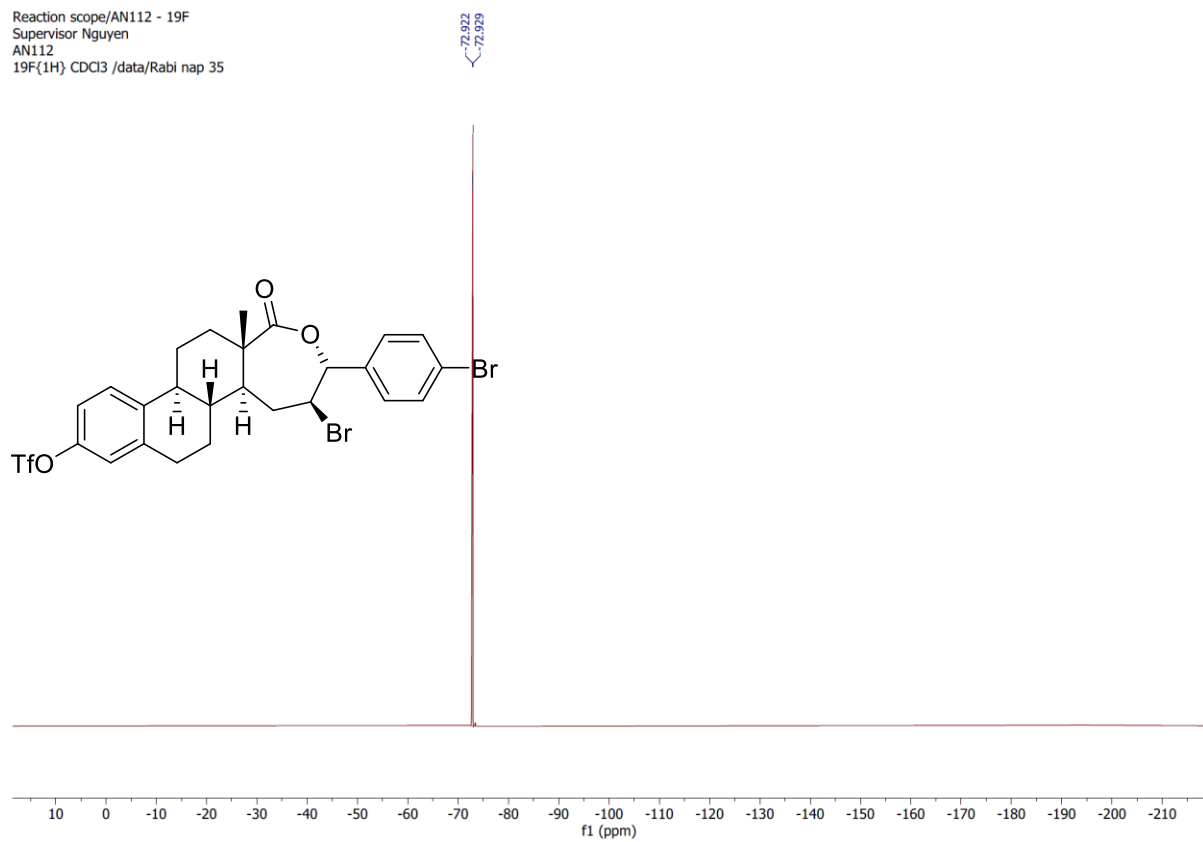

**6-(bromomethyl)-6-(4-fluorophenyl)tetrahydro-2H-pyran-2-one (3p):  $^1\text{H}$  NMR (400 MHz) and  $^{13}\text{C}$  NMR (101 MHz,  $\text{CDCl}_3$ )**

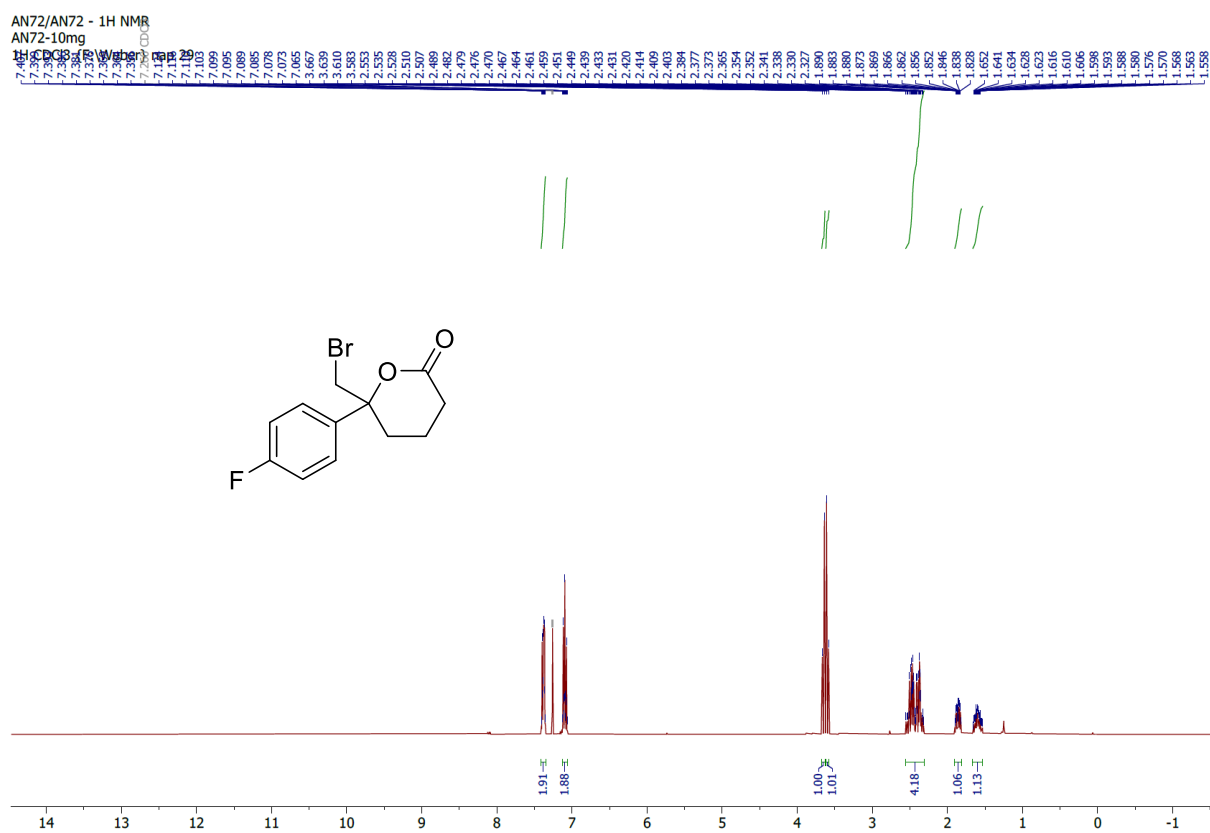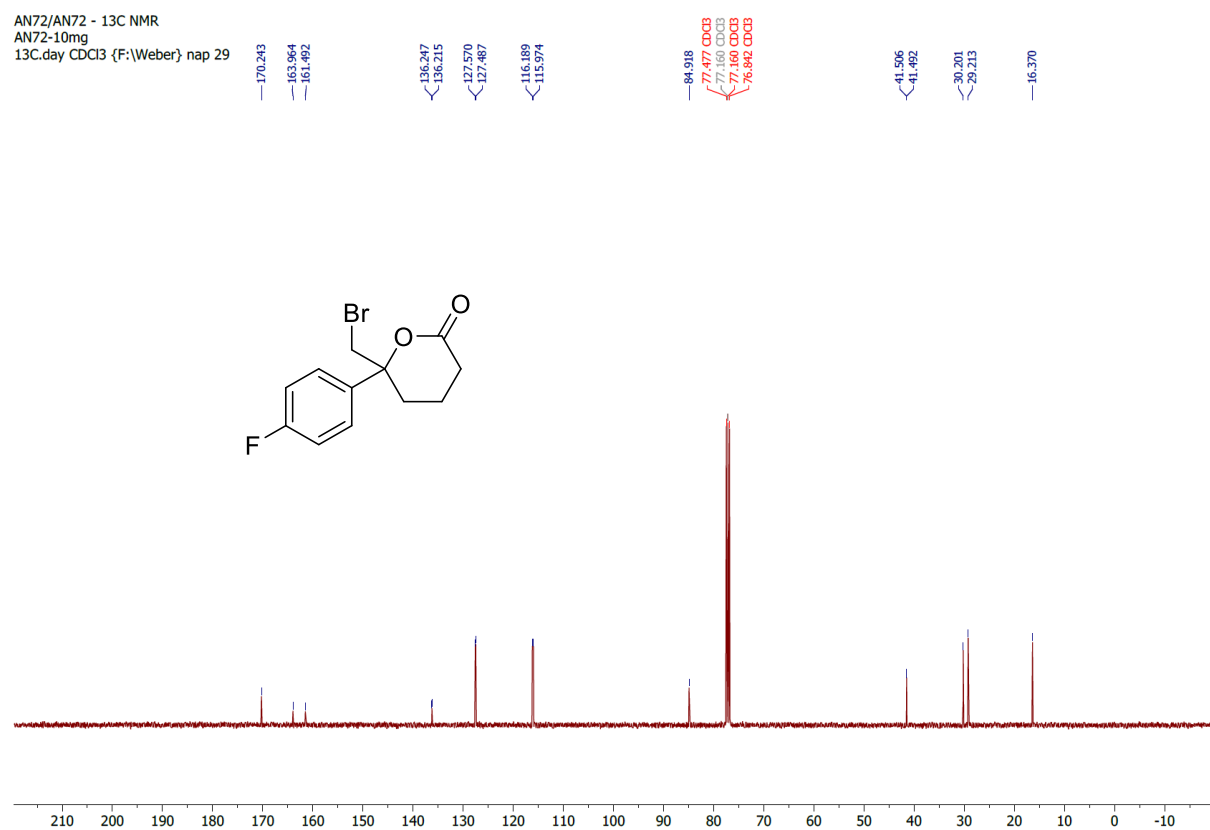

230427-nap.4.fid  
AN72-10mg  
19F CDC13 {F:\Weber} nap 29

-113.19

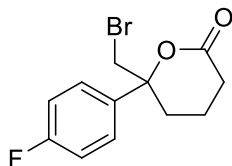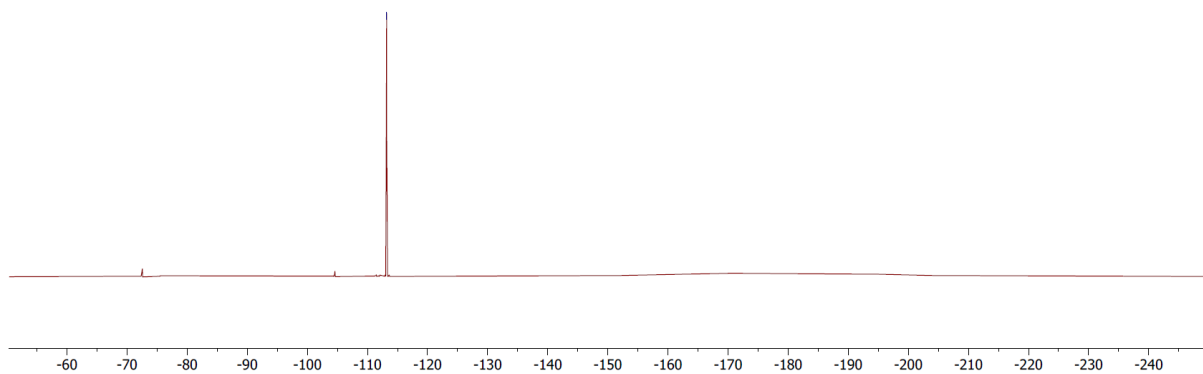

**4-bromo-3-phenylisochroman-1-one (2q):**  $^1\text{H}$  NMR (400 MHz) and  $^{13}\text{C}$  NMR (101 MHz,  $\text{CDCl}_3$ )

AN111/AN111-1H NMR  
Supervisor Nguyen  
AN111  
1H  $\text{CDCl}_3$  /data/Rabi nap 53

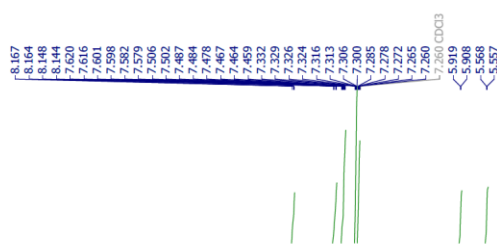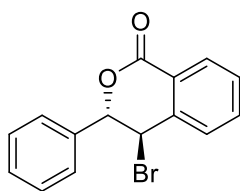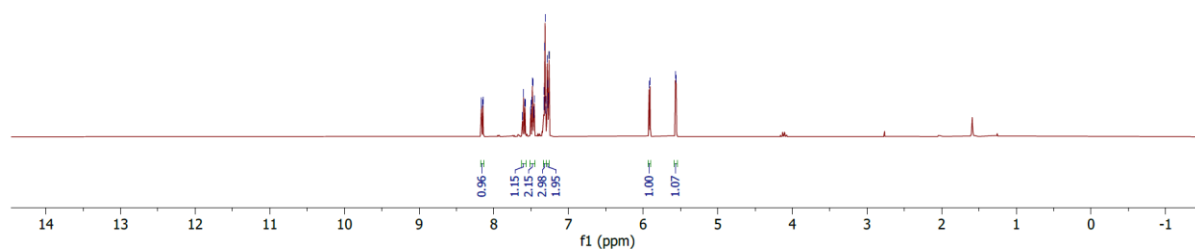

AN111/AN111-13C NMR  
Supervisor Nguyen  
AN111  
13C.day  $\text{CDCl}_3$  /data/Rabi nap 53

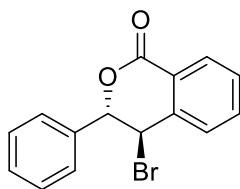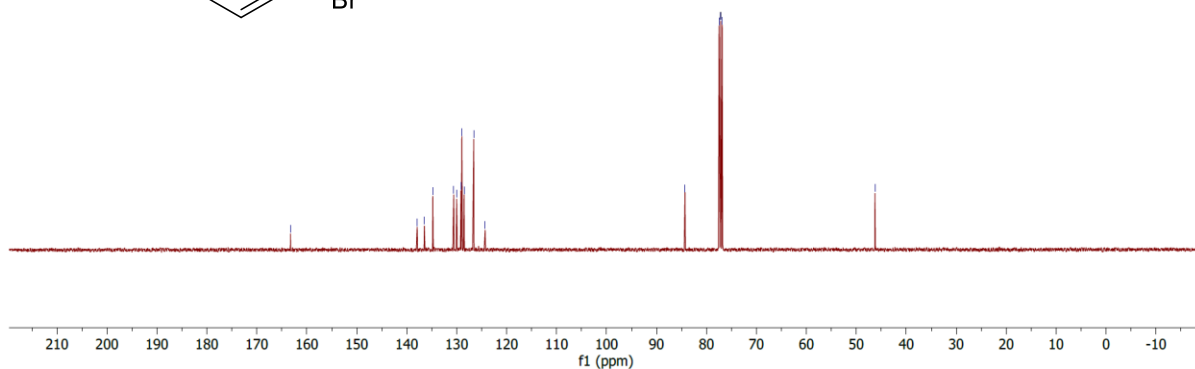



**6-(bromo(phenyl)methyl)tetrahydro-2H-pyran-2-one (3a):**  $^1\text{H}$  NMR (400 MHz) and  $^{13}\text{C}$  NMR (101 MHz,  $\text{CDCl}_3$ )

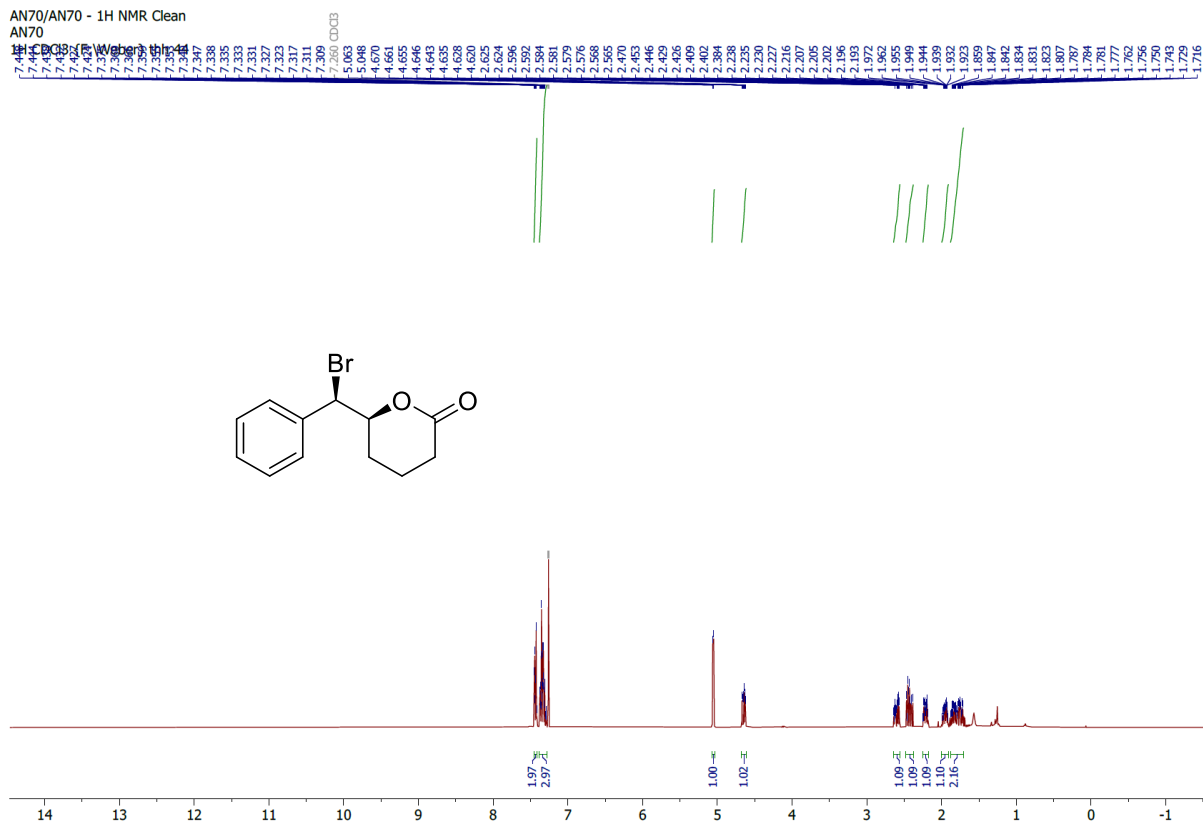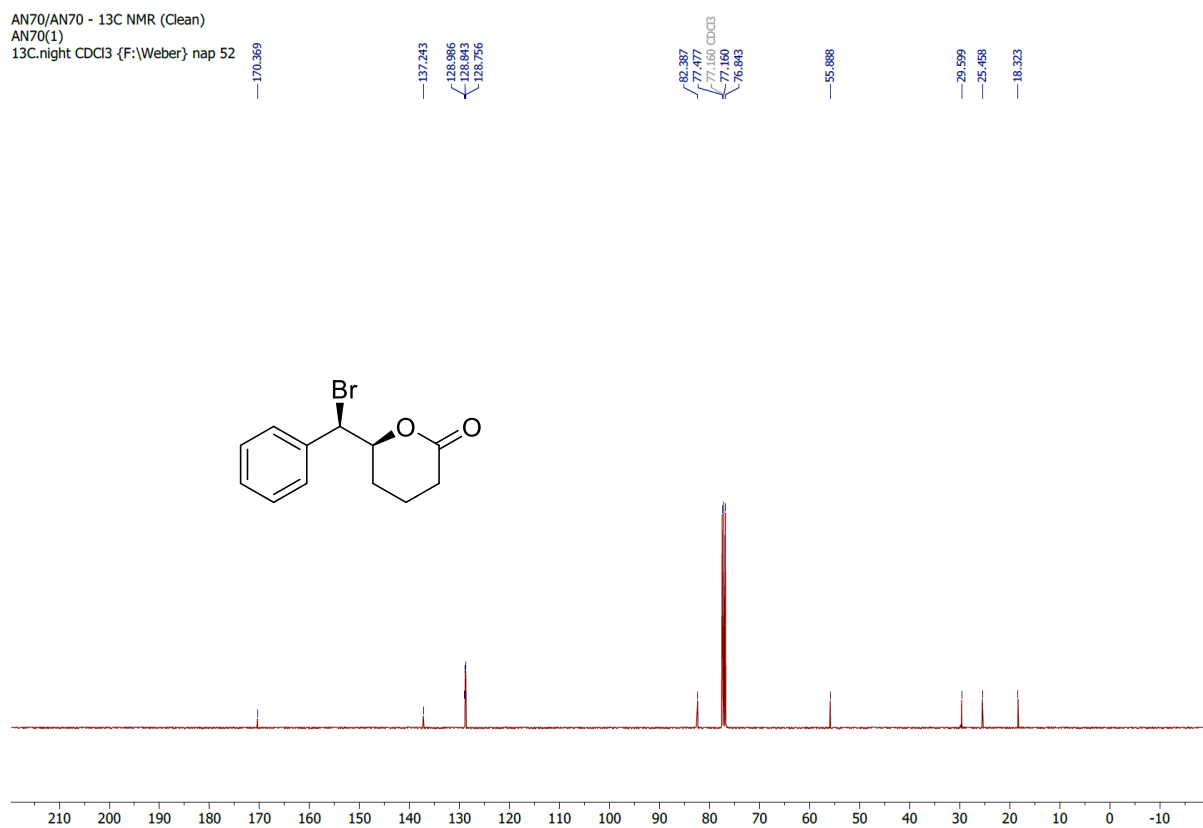

**6-(bromo(p-tolyl)methyl)tetrahydro-2H-pyran-2-one (3b):  $^1\text{H}$  NMR (400 MHz) and  $^{13}\text{C}$  NMR (101 MHz,  $\text{CDCl}_3$ )**

AN84/AN84 -  $^1\text{H}$  NMR Clean  
 Supervisor Nguyen  
 AN84-1  
 13C.day CDCl3 (F:\Weber) nap 48

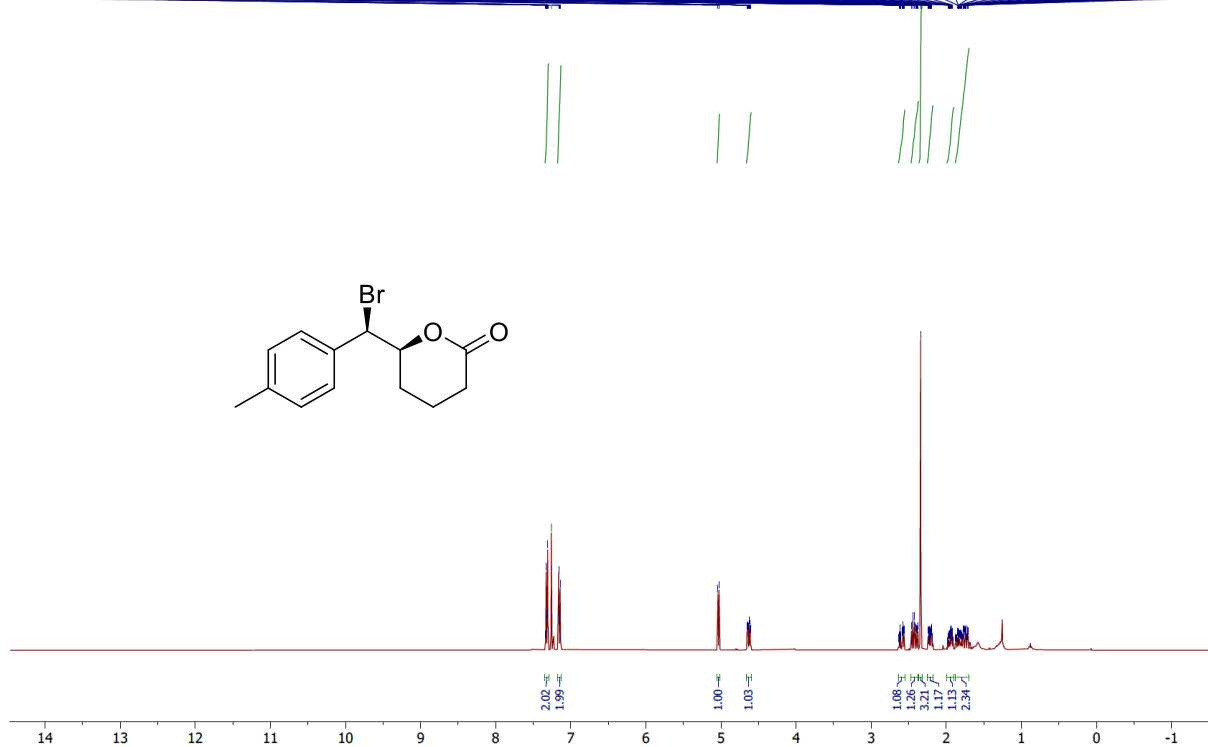

AN84/AN84 -  $^{13}\text{C}$  NMR (Prep TLC)  
 AN84-1  
 13C.day CDCl3 (F:\Weber) nap 48

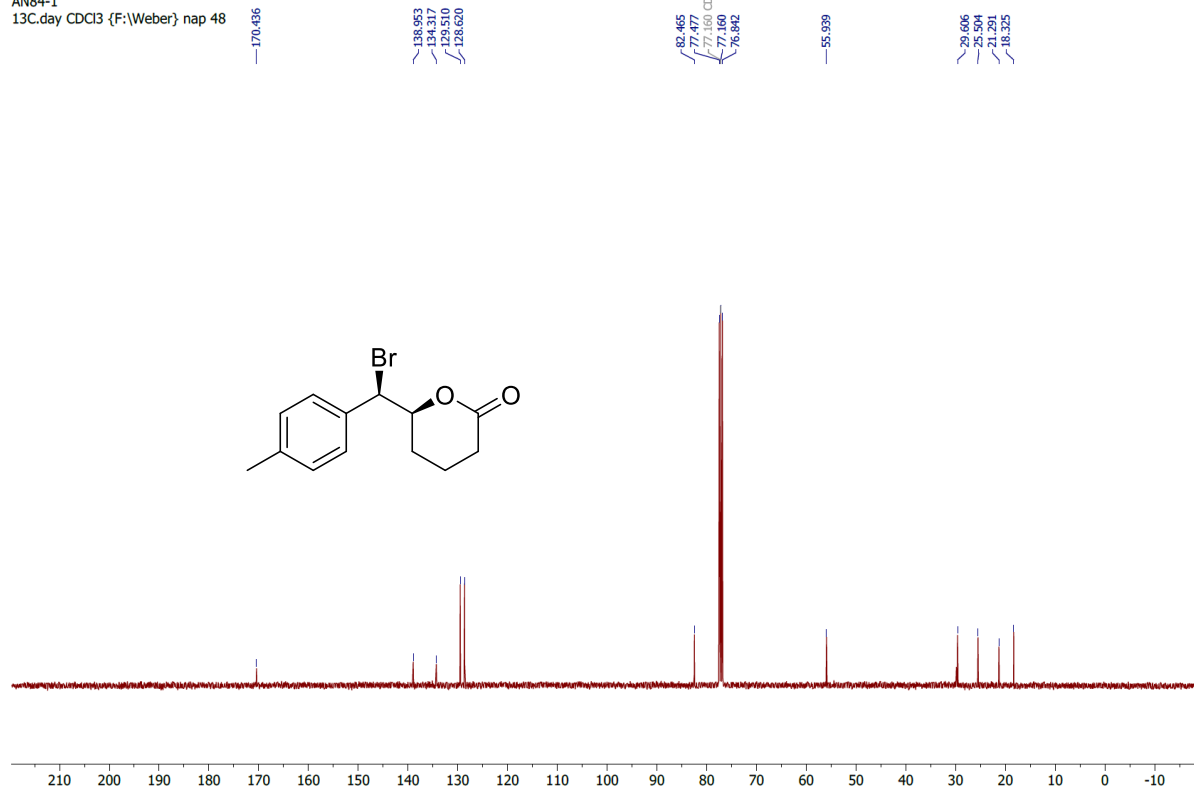

**6-(bromo(4-bromophenyl)methyl)tetrahydro-2H-pyran-2-one (3c):**  $^1\text{H}$  NMR (400 MHz) and  $^{13}\text{C}$  NMR (101 MHz,  $\text{CDCl}_3$ )

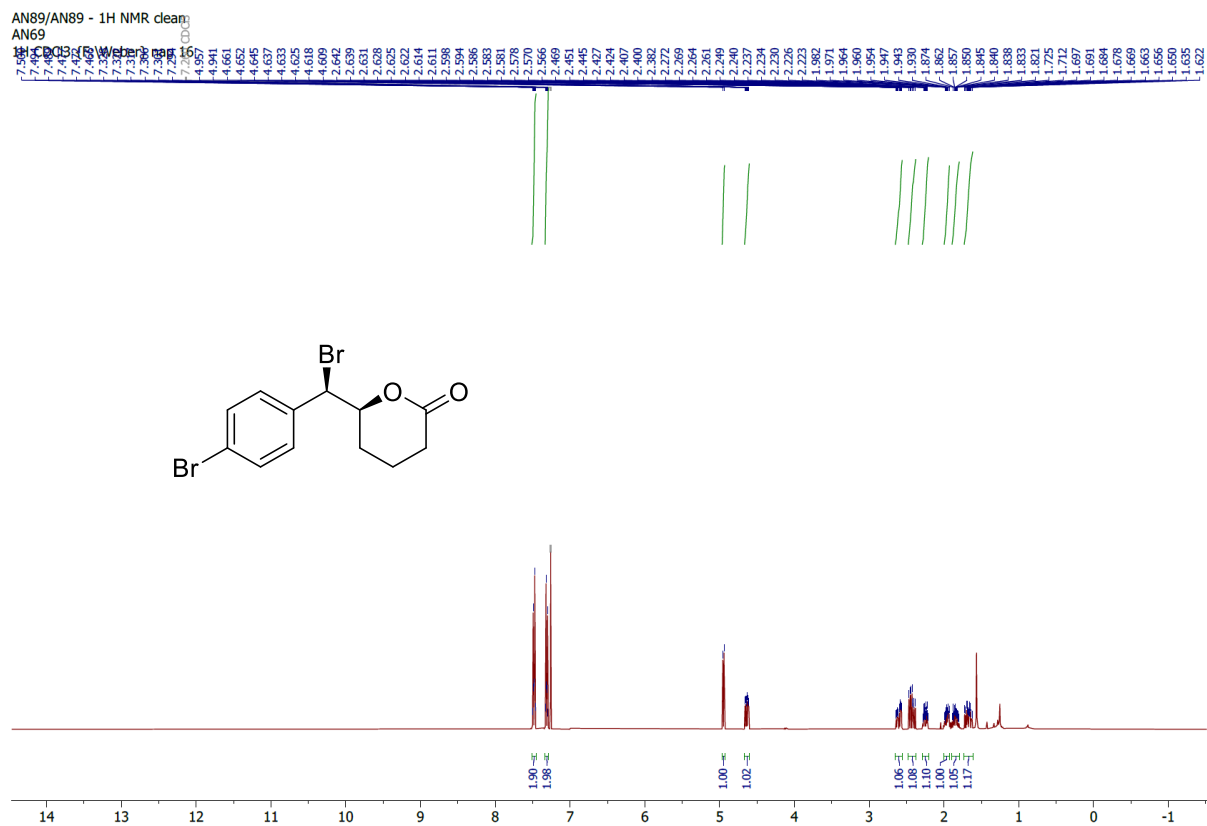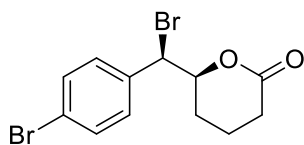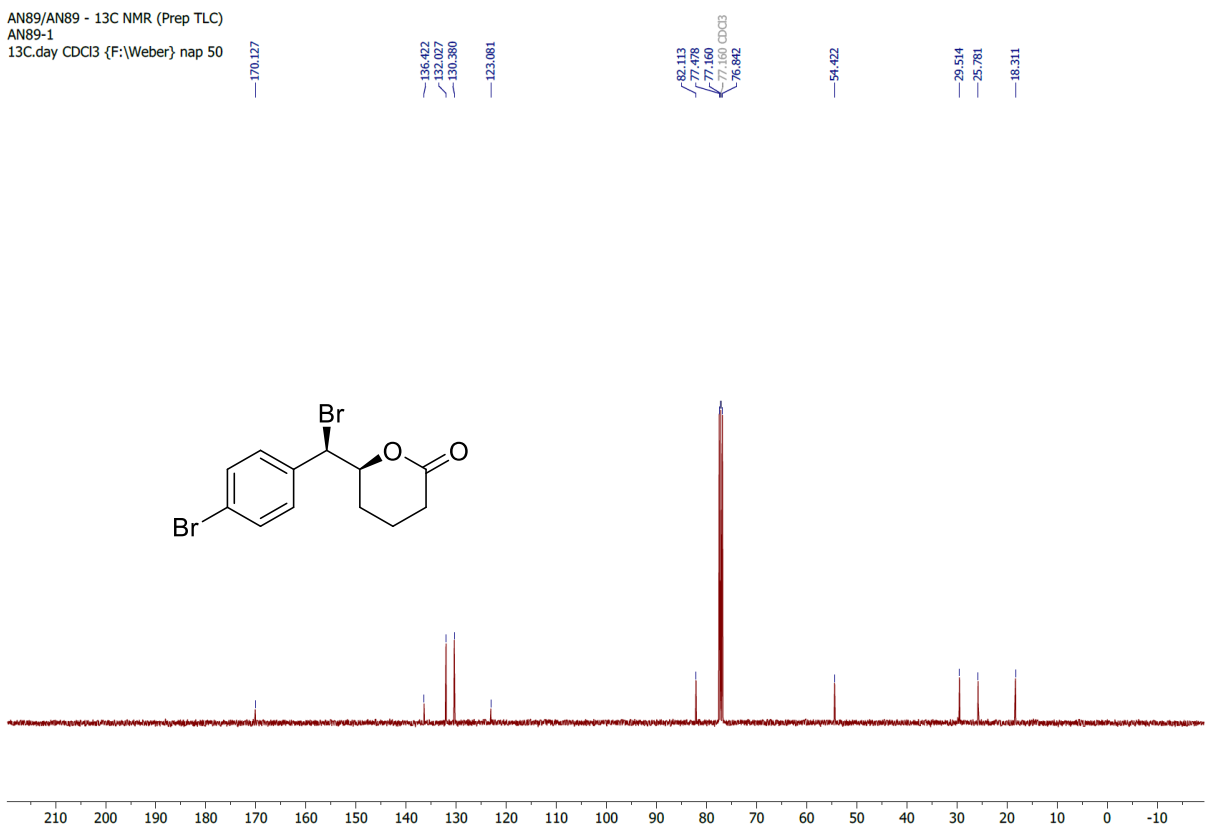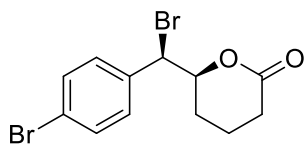



230427-nap.10.fid  
AN87-10mg  
11B CDCl3 {F:\Weber} nap 50

30.79

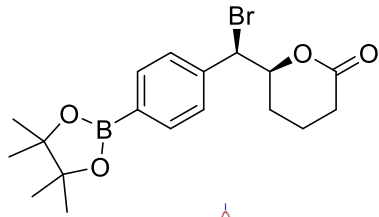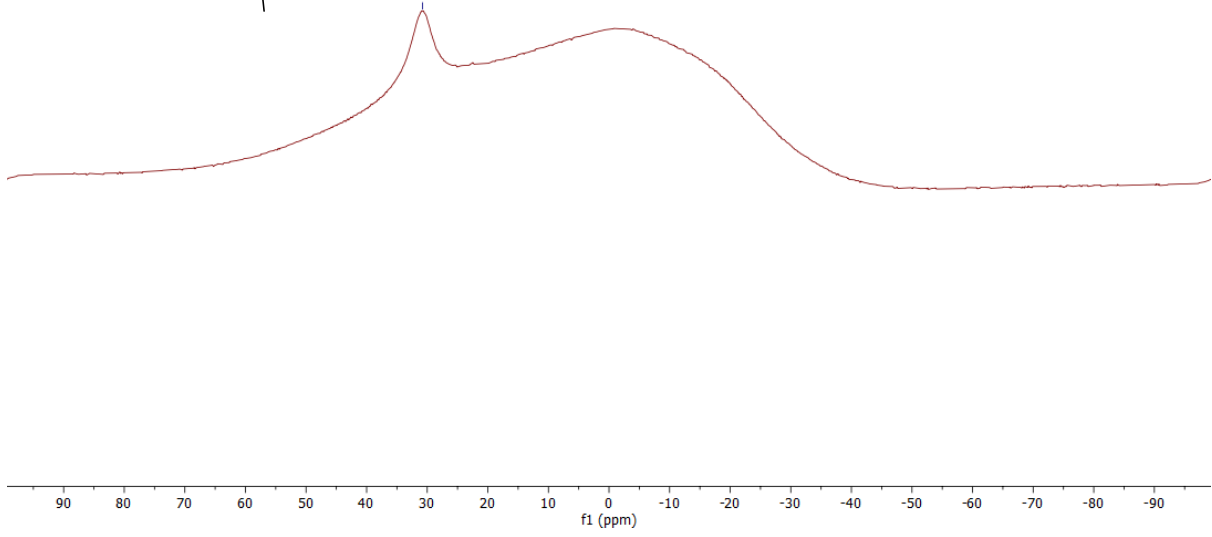



**6-(bromo(2-bromophenyl)methyl)tetrahydro-2H-pyran-2-one (3g):**  $^1\text{H}$  NMR (400 MHz) and  $^{13}\text{C}$  NMR (101 MHz,  $\text{CDCl}_3$ )

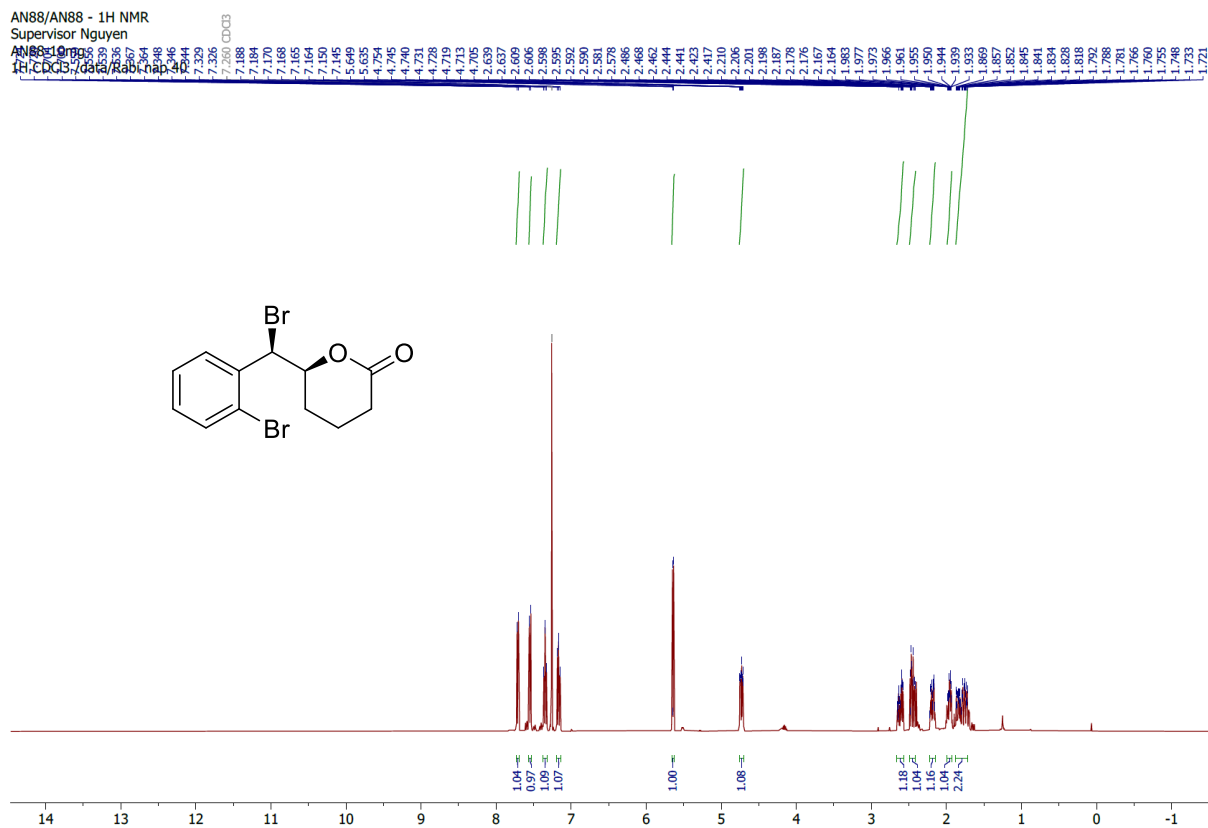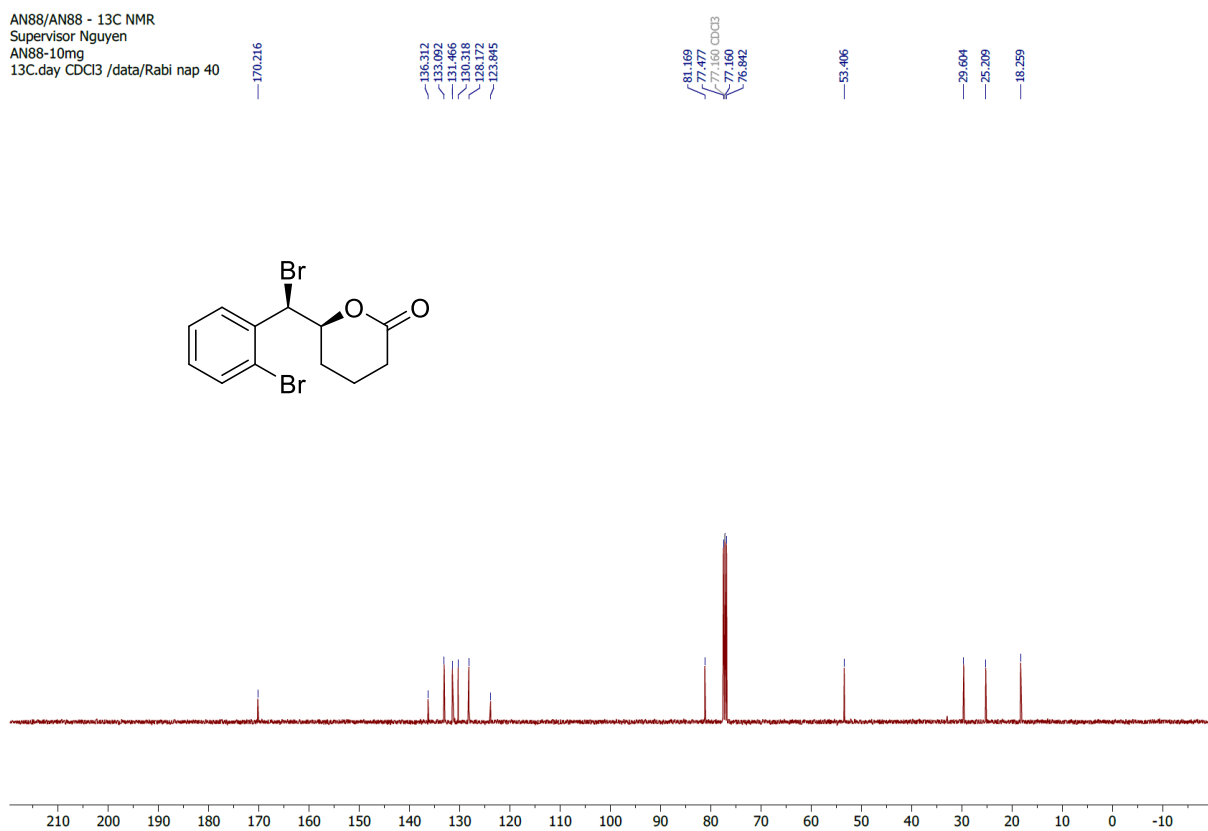

**6-(bromo(phenyl)methyl)-3,3-dimethyltetrahydro-2H-pyran-2-one (3j):**  $^1\text{H}$  NMR (400 MHz) and  $^{13}\text{C}$  NMR (101 MHz,  $\text{CDCl}_3$ )

AN90/AN90 -  $^1\text{H}$  NMR  
AN90-10mg  
 $^1\text{H}$   $\text{CDCl}_3$  {F:\Weber} nap 49

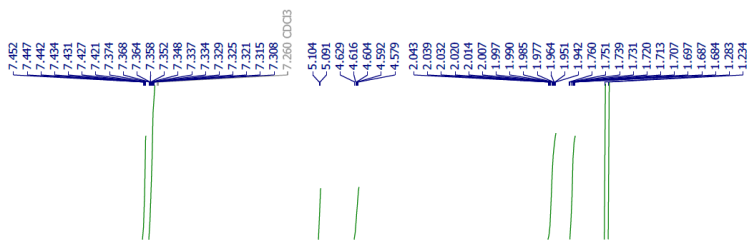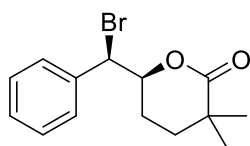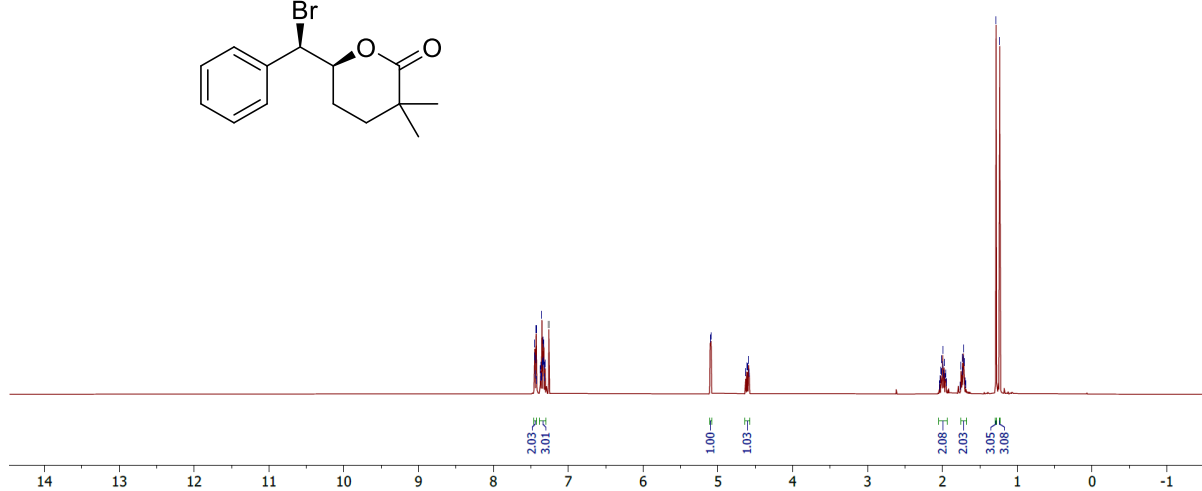

AN90/AN90 -  $^{13}\text{C}$  NMR  
AN90-10mg  
 $^{13}\text{C}$ .day  $\text{CDCl}_3$  {F:\Weber} nap 49

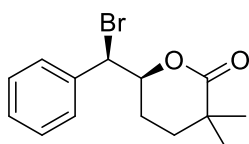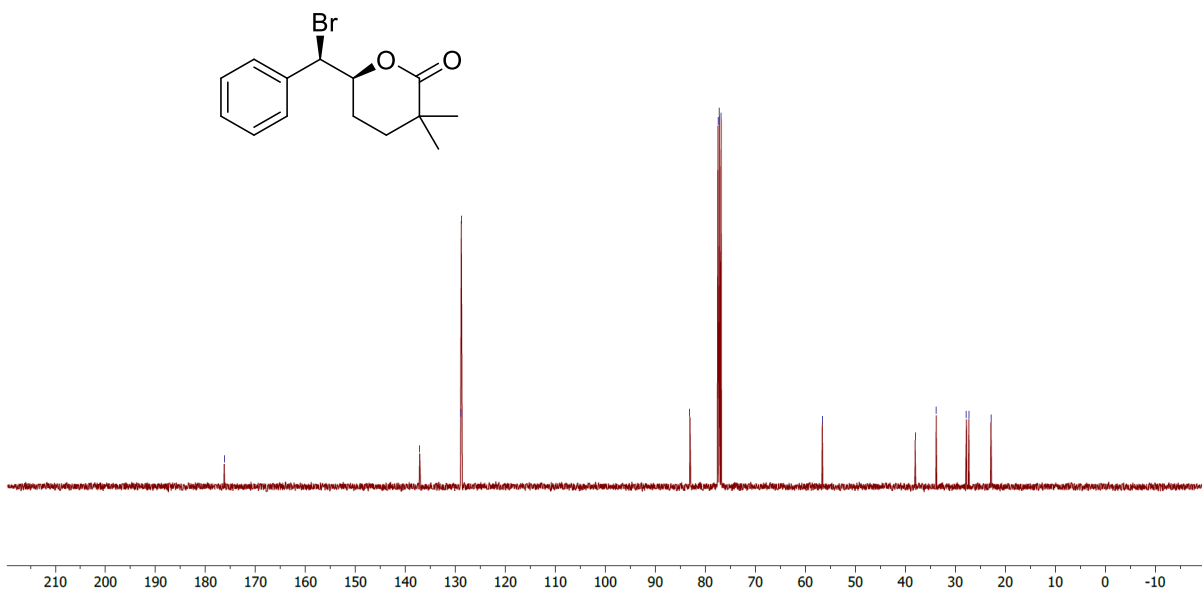



**5-(bromo(phenyl)methyl)dihydrofuran-2(3H)-one (3I):  $^1\text{H}$  NMR (400 MHz) and  $^{13}\text{C}$  NMR (101 MHz,  $\text{CDCl}_3$ )**

AN100/AN100 -  $^1\text{H}$  NMR  
AN100-10mg  
 $^1\text{H}$   $\text{CDCl}_3$  {F:\Weber} nap 4

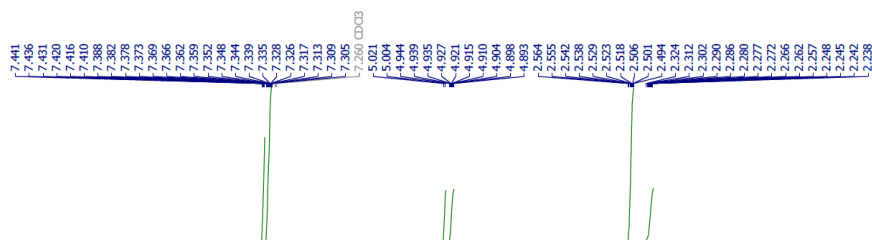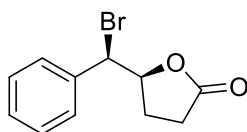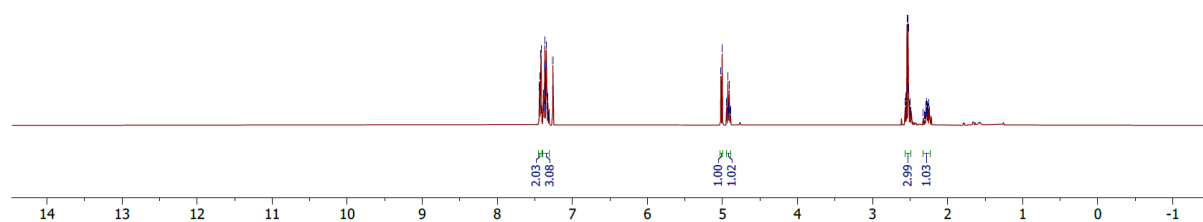

AN100/AN100 -  $^{13}\text{C}$  NMR  
AN100-10mg  
13C.day  $\text{CDCl}_3$  {F:\Weber} nap 9

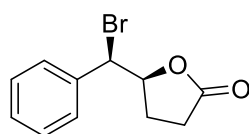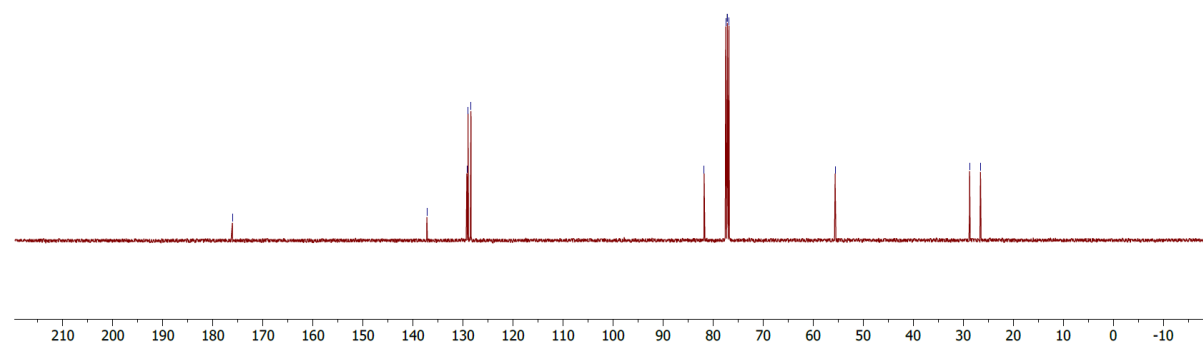

**(4a*S*,4b*R*,10b*S*,12a*S*)-3-(bromo(4-bromophenyl)methyl)-12a-methyl-1-oxo-3,4,4a,4b,5,6,10b,11,12,12a-decahydro-1*H*-naphtho[2,1-*f*]isochromen-8-yl trifluoromethanesulfonate (3o):** <sup>1</sup>H NMR (400 MHz), <sup>13</sup>C NMR (101 MHz, CDCl<sub>3</sub>) and <sup>19</sup>F NMR (376 MHz, CDCl<sub>3</sub>)

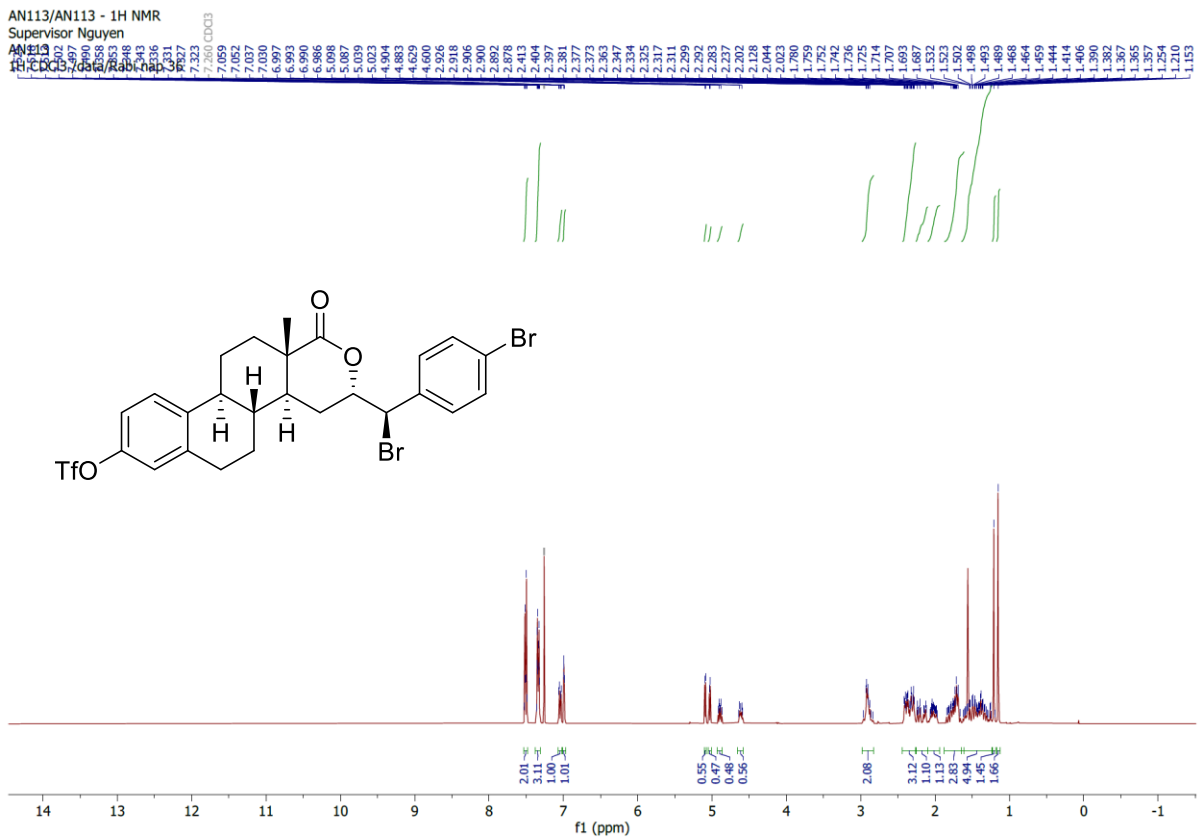

AN113/AN113 - 13C NMR  
Supervisor Nguyen  
AN113  
13C.night CDCl3 /data/Rabi tat

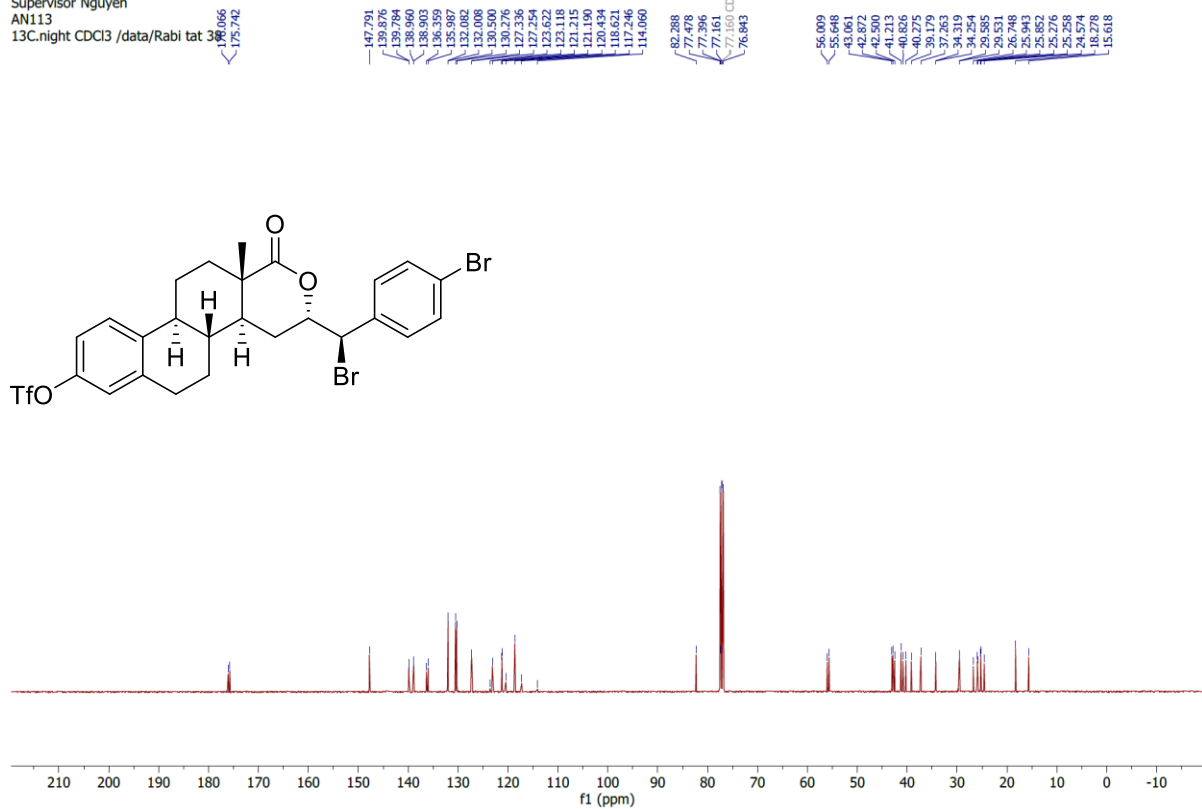

AN113/AN113 - 19H  
Supervisor Nguyen  
AN113  
19F{1H} CDCl3 /data/Rabi nap 36

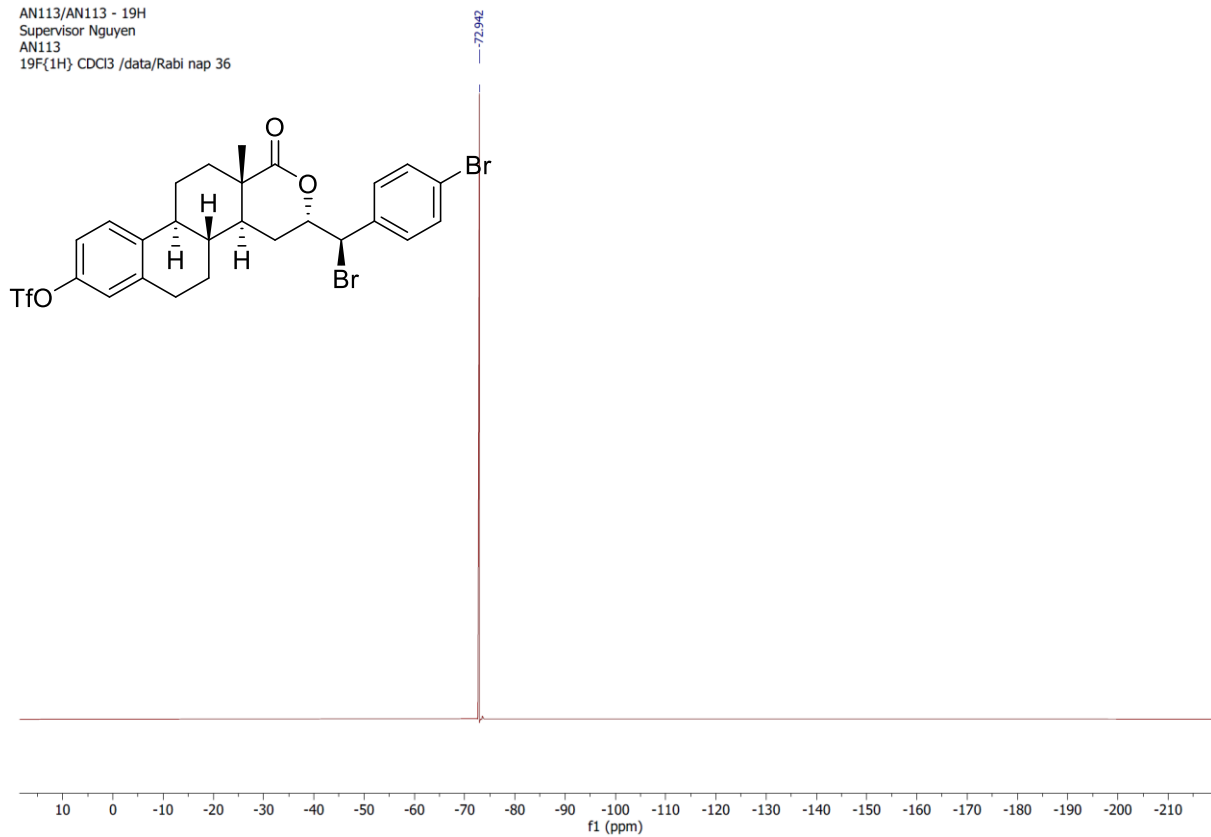

**6-(1-bromo-2-methylpropyl)tetrahydro-2H-pyran-2-one (3r):**  $^1\text{H}$  NMR (400 MHz) and  $^{13}\text{C}$  NMR (101 MHz,  $\text{CDCl}_3$ )

AN119/AN119-1H NMR  
 AN119  
 $^1\text{H}$  NMR

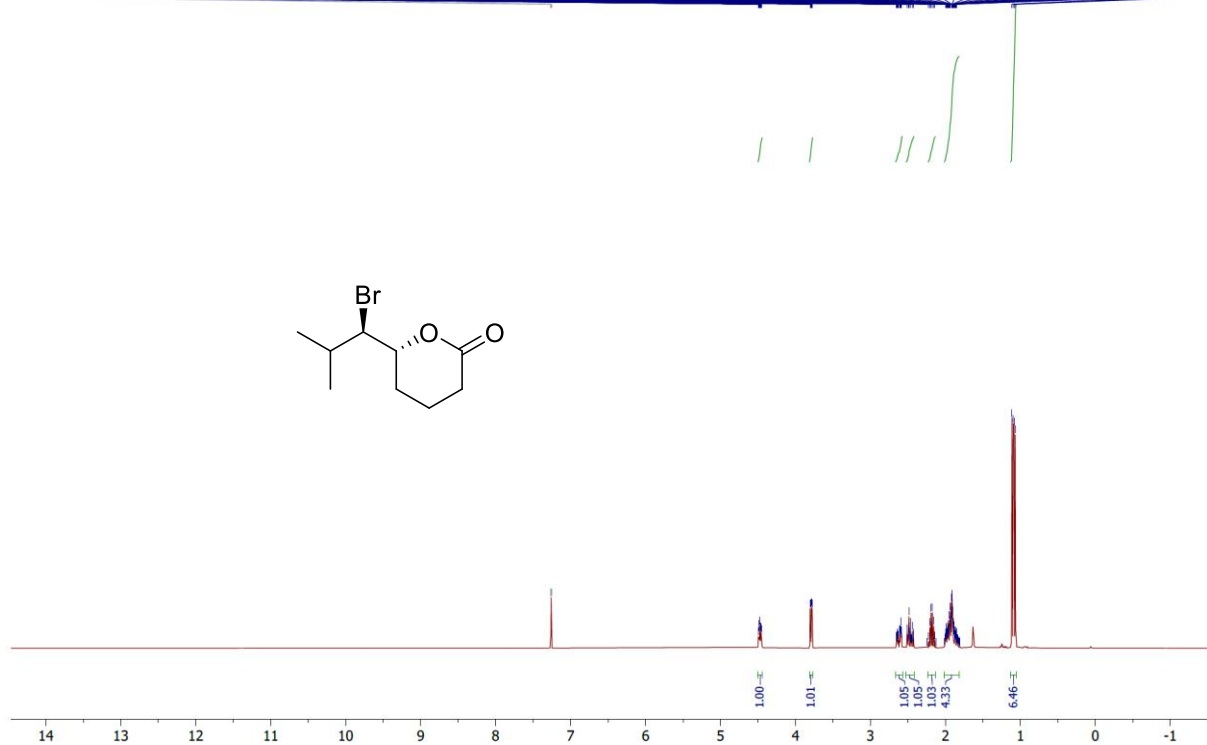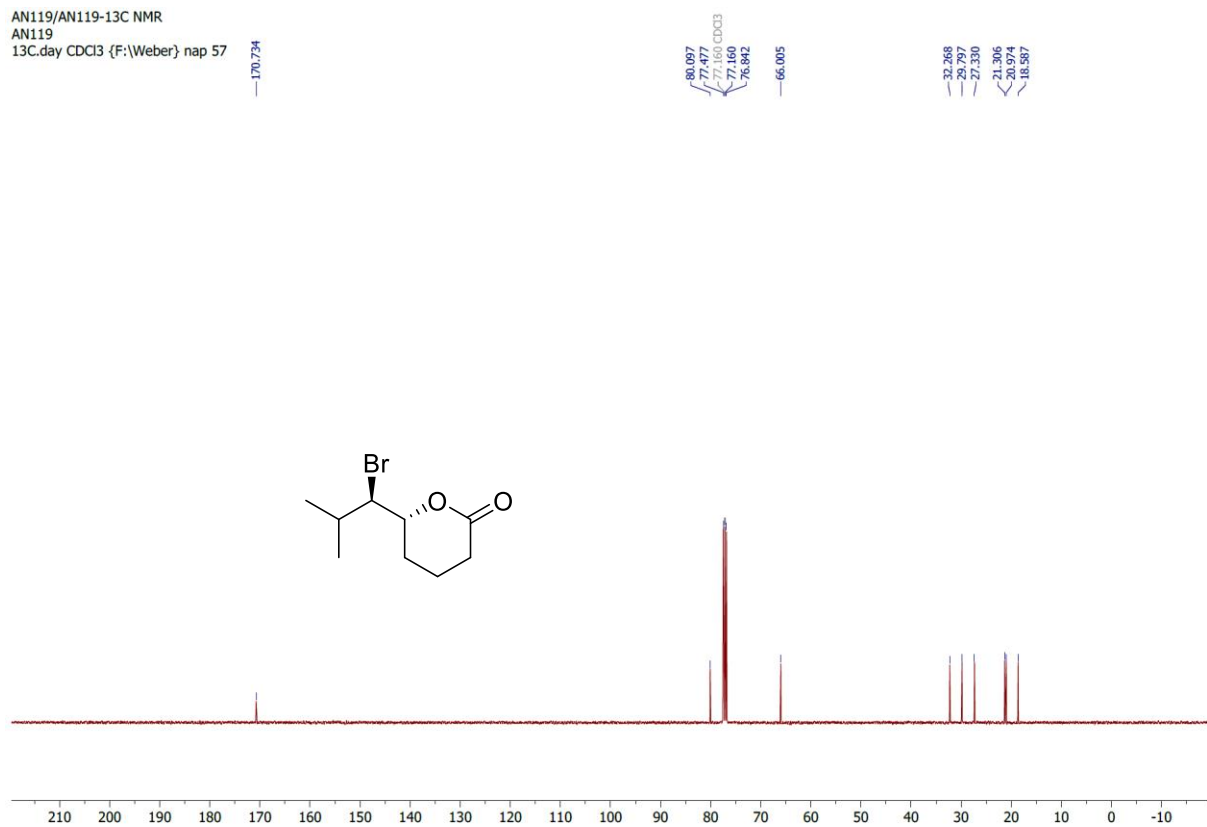

**5-(1-bromo-2-methylpropyl)dihydrofuran-2(3H)-one (3s):  $^1\text{H}$  NMR (400 MHz) and  $^{13}\text{C}$  NMR (101 MHz,  $\text{CDCl}_3$ )**

AN116/AN116-1H NMR  
AN116  
 $^1\text{H}$   $\text{CDCl}_3$  {F:\Weber} nap 12

7.760 CDCl<sub>3</sub>  
4.745  
4.736  
4.728  
4.726  
4.720  
4.717  
4.706  
4.700  
3.672  
3.663  
3.656  
3.648  
2.747  
2.741  
2.721  
2.708  
2.703  
2.690  
2.676  
2.664  
2.650  
2.550  
2.544  
2.524  
2.505  
2.499  
2.479  
2.471  
2.467  
2.398  
2.391  
2.385  
2.378  
2.372  
2.366  
2.353  
2.353  
2.346  
2.340  
2.327  
2.205  
2.189  
2.185  
2.179  
2.173  
2.169  
2.163  
2.159  
2.156  
2.143  
2.143  
2.143  
2.137  
2.130  
2.127  
2.111  
2.094  
2.094  
2.062  
1.104  
1.101  
1.087  
1.084

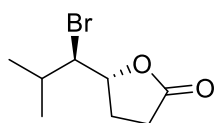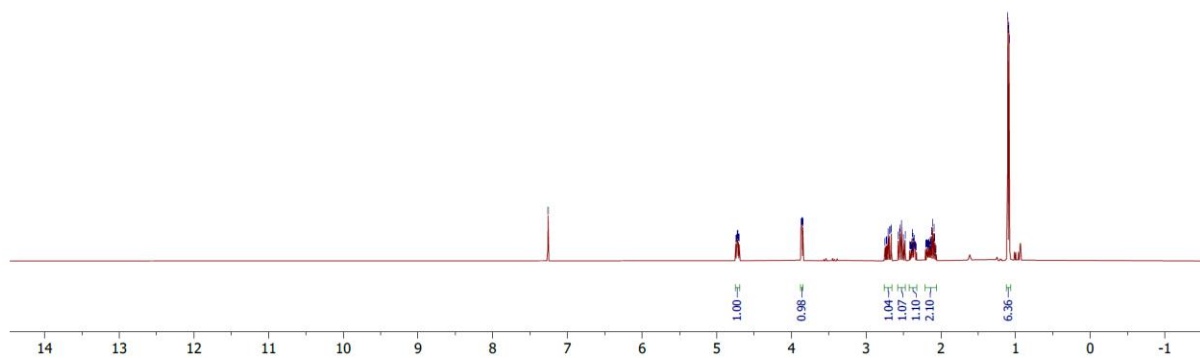

AN116/AN116-13C NMR  
AN116  
 $^{13}\text{C}$ .day  $\text{CDCl}_3$  {F:\Weber} nap 12

176.335

80.035  
77.478  
77.161  
77.160 CDCl<sub>3</sub>  
76.843  
66.946

32.997  
28.418  
28.035  
21.314  
20.427

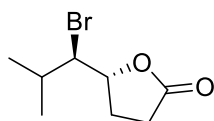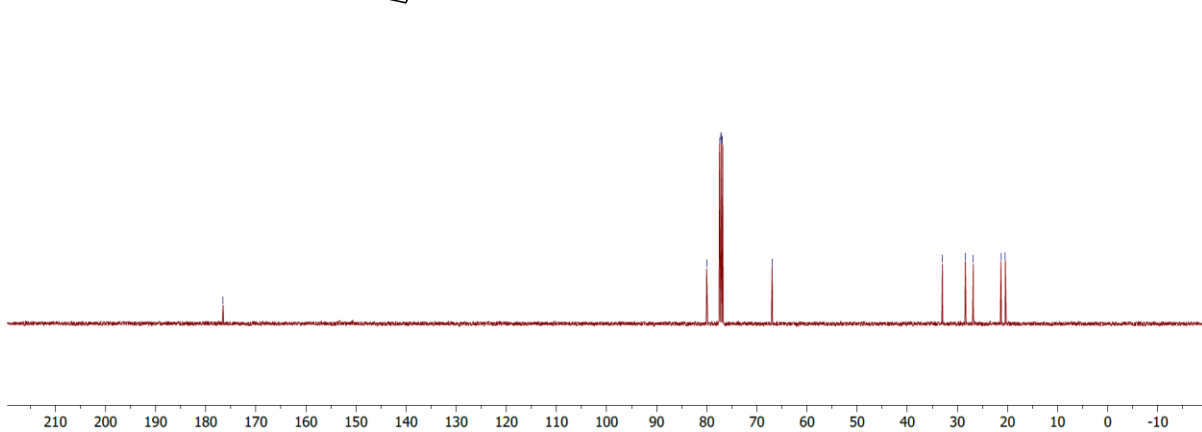

**1-(bromoethyl)dihydrofuran-2(3*H*)-one (3t): <sup>1</sup>H NMR (400 MHz) and <sup>13</sup>C NMR (101 MHz, CDCl<sub>3</sub>)**

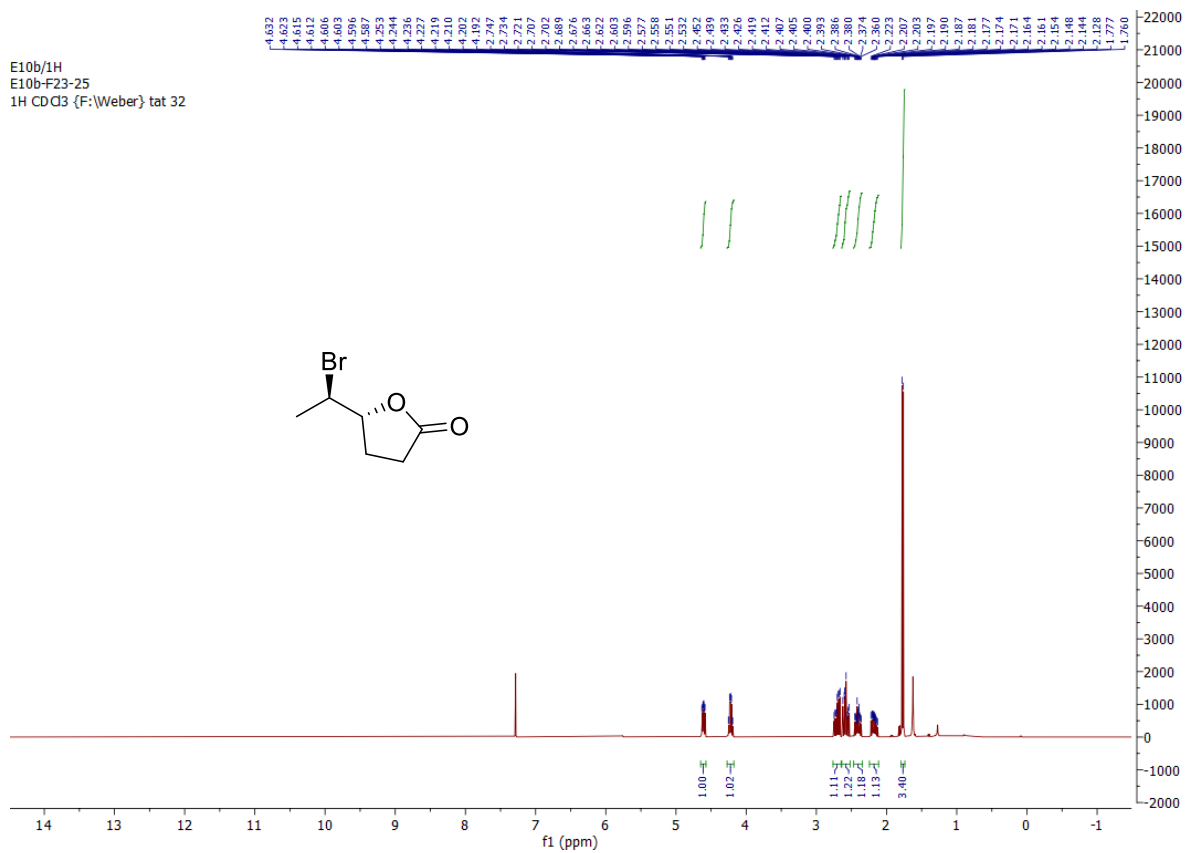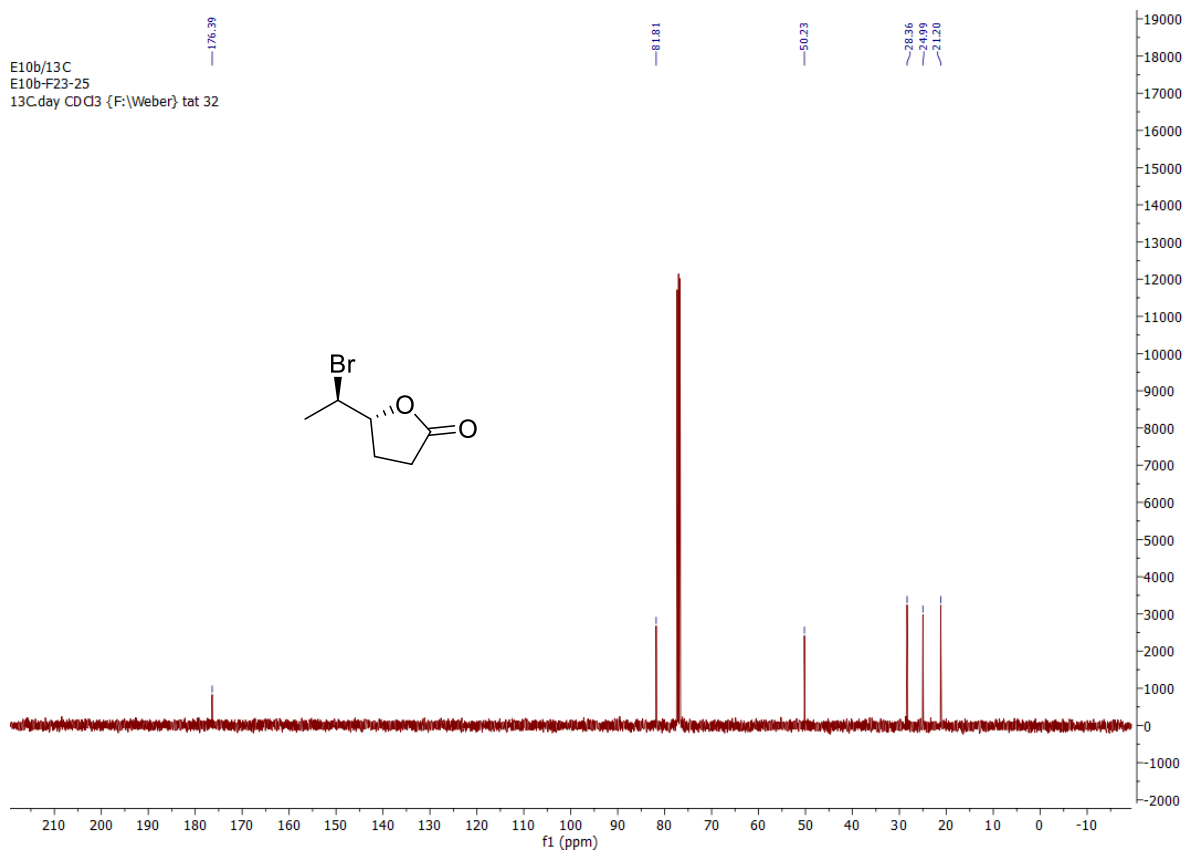

## References

1. T. A. To and T. V. Nguyen, Olefination of Aromatic Carbonyls via Site-Specific Activation of Cycloalkanone Ketals, *Angew. Chem. Int. Ed.*, 2024, **63**, e202317003.
2. A. V. Bay, E. J. Farnam and K. A. Scheidt, Synthesis of Cyclohexanones by a Tandem Photocatalyzed Annulation, *J. Am. Chem. Soc.*, 2022, **144**, 7030-7037.
3. A. K. Chatterjee, T.-L. Choi, D. P. Sanders and R. H. Grubbs, A General Model for Selectivity in Olefin Cross Metathesis, *J. Am. Chem. Soc.*, 2003, **125**, 11360-11370.
4. X. Jiang, C. K. Tan, L. Zhou and Y.-Y. Yeung, Enantioselective Bromolactonization Using an S-Alkyl Thiocarbamate Catalyst, *Angew. Chem. Int. Ed.*, 2012, **51**, 7771-7775.
5. S. A. Shahzad, C. Vivant and T. Wirth, Selenium-Mediated Synthesis of Biaryls through Rearrangement, *Org. Lett.*, 2010, **12**, 1364-1367.
6. S. Ortgies, R. Rieger, K. Rode, K. Koszinowski, J. Kind, C. M. Thiele, J. Rehbein and A. Breder, Mechanistic and Synthetic Investigations on the Dual Selenium- $\pi$ -Acid/Photoredox Catalysis in the Context of the Aerobic Dehydrogenative Lactonization of Alkenoic Acids, *ACS Catal.*, 2017, **7**, 7578-7586.
7. C. K. Tan, C. Le and Y.-Y. Yeung, Enantioselective bromolactonization of cis-1,2-disubstituted olefinic acids using an amino-thiocarbamate catalyst, *Chem. Commun.*, 2012, **48**, 5793-5795.
8. R. Brimiouille, A. Bauer and T. Bach, Enantioselective Lewis Acid Catalysis in Intramolecular [2 + 2] Photocycloaddition Reactions: A Mechanistic Comparison between Representative Coumarin and Enone Substrates, *J. Am. Chem. Soc.*, 2015, **137**, 5170-5176.
9. C. Qi, G. Force, V. Gandon and D. Leboeuf, Hexafluoroisopropanol-Promoted Haloamidation and Halolactonization of Unactivated Alkenes, *Angew. Chem. Int. Ed.*, 2021, **60**, 946-953.
10. R. Kim, J. Ha, J. Woo and D. Y. Kim, Electrochemical oxidative bromolactonization of unsaturated carboxylic acids with sodium bromide: Synthesis of bromomethylated  $\gamma$ -lactones, *Tetrahedron Letters*, 2022, **88**, 153567.
11. T. Chen and Y.-Y. Yeung, Trifluoroacetic acid catalyzed highly regioselective bromocyclization of styrene-type carboxylic acid, *Org. Biomol. Chem.*, 2016, **14**, 4571-4575.
12. D. H. Paull, C. Fang, J. R. Donald, A. D. Pansick and S. F. Martin, Bifunctional Catalyst Promotes Highly Enantioselective Bromolactonizations To Generate Stereogenic C-Br Bonds, *J. Am. Chem. Soc.*, 2012, **134**, 11128-11131.

13. K. Moriyama, C. Nishinohara, T. Sugiue and H. Togo, Oxidative oxygen-nucleophilic bromo-cyclization of alkenyl carbonyl compounds without organic wastes using alkali metal reagents in green solvent, *RSC Advances*, 2015, **5**, 85872-85878.
14. J. E. Tungen, R. Kristianslund, A. Vik and T. V. Hansen, Organoselenium Accelerated Bromolactonization Reaction, *J. Org. Chem.*, 2019, **84**, 11373-11381.



## Computational Methods

DFT calculations were performed using the *Gaussian 16* program.<sup>1</sup> Geometries of all stationary points were fully optimized using the M06-2X functional<sup>2</sup> with 6-31G(d,p) basis set. Vibrational frequency calculations at the same level of theory of the geometry optimization were performed at 298.15 K to confirm if each structure is a local minimum or a transition state. Quasi-harmonic approximation with the Cramer and Truhlar approach<sup>3</sup> was performed using the GoodVibes package,<sup>4</sup> in which all vibrational frequencies below 100 cm<sup>-1</sup> were shifted to 100 cm<sup>-1</sup> in entropy calculations. To obtain higher accuracy for the electronic energies, single-point energy calculations were carried out using the MN15 functional<sup>5</sup> and 6-311+G(2d,2p) basis set. In geometry optimizations and single-point energy calculations, hexafluoroisopropanol (HFIP) and dichloroethane (DCE) are used as solvents using the SMD implicit solvation model.<sup>6</sup> Because the solvent parameters for HFIP are not available in *Gaussian 16*, the solvent parameters for HFIP were defined using reported literature values: the dielectric constant (the relative permittivity) of the solvent at 298 K was set to 16.7 (i.e. "Eps",  $\epsilon$ );<sup>7</sup> the square of refractive index (i.e. "EpsInf",  $n^2$ ) was set to 1.625625;<sup>8</sup> Abraham's hydrogen bond acidity (i.e. "HbondAcidity",  $\alpha$ ) and basicity (i.e. "HbondBasicity",  $\beta$ ) were set to 0.77 and 0.10,<sup>9</sup> respectively; the macroscopic surface tension at a liquid-air interface at 298 K (i.e. "SurfaceTensionAtInterface",  $\gamma$ ) was set to 23.23 (in cal·mol<sup>-1</sup>·Å<sup>-2</sup>);<sup>10</sup> the fraction of non-hydrogenic solvent atoms that are aromatic carbon atoms (i.e. "CarbonAromaticity",  $\phi$ ) was set to 0.00 because there is no aromatic carbon atoms in HFIP; the fraction of non-hydrogenic solvent atoms that are F, Cl, or Br (i.e. "ElectronegativeHalogenicity",  $\psi$ ) was set to 0.60 (6 F atoms out of 10 non-hydrogenic atoms). In addition, to account for the hydrogen-bonding interactions between the HFIP solvent molecules and the template, a mixed explicit-implicit solvation protocol is applied where explicit HFIP molecules were added to the computational investigation. In these calculations, the outer-shell solvent molecules are treated using the implicit solvation model (SMD) described above. Reaction energies for the lactonization are calculated as follows (**Scheme S1**).

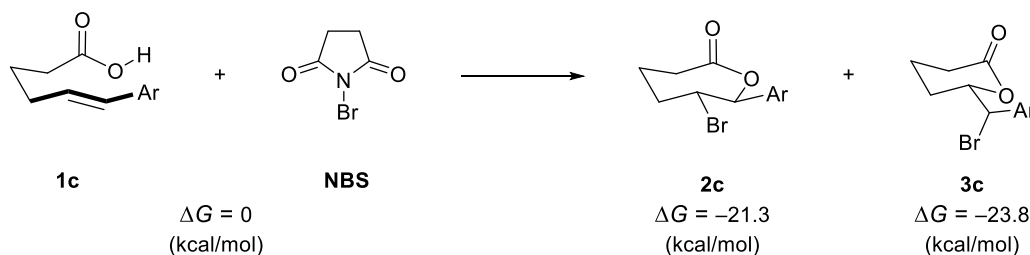

**Scheme S1.** Reaction energies for the bromolactonization.

Conformational sampling was carried out for each intermediate and transition state using metadynamics simulations and a genetic z-matrix crossing (iMTD-GC) approach in the gas phase with the conformer–rotamer ensemble sampling (CREST) algorithm.<sup>11</sup> In all conformational samplings, the semiempirical tight-binding based quantum chemistry method GFN2-xTB, implemented in the xTB code<sup>12</sup> was used. Conformers within 10.0 kcal/mol of the lowest-energy conformer were included in subsequent DFT calculations. Structural similarity of low-energy conformers was analyzed using root-mean-square deviation (RMSD), where conformers that have RMSD less than 0.5 Å were considered as duplicates and discarded. Initial DFT optimizations were carried out for intermediates and transition states to obtain geometry information for conformational samplings. During TS sampling, the forming/breaking bond distances were fixed to the values obtained from initial DFT-optimized TS geometries. In order to avoid the dissociation of HFIP molecules during conformational sampling, the hydrogen bond O···H distances were also fixed to the values obtained from initial DFT-optimized geometries. Each of the unique conformers was then re-optimized without constraint with DFT.

## Additional Computational Results

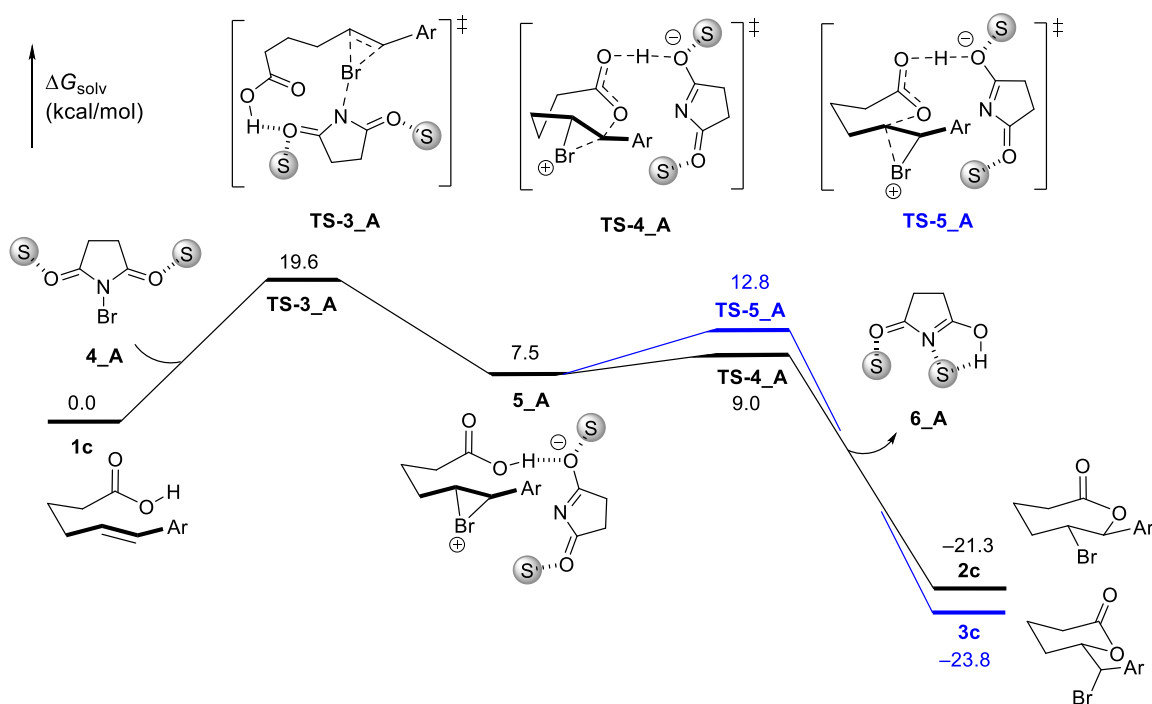

**Figure S1.** Computed free energy profile for the stepwise bromolactonization in HFIP. Two HFIP solvent molecules were included in DFT calculations.

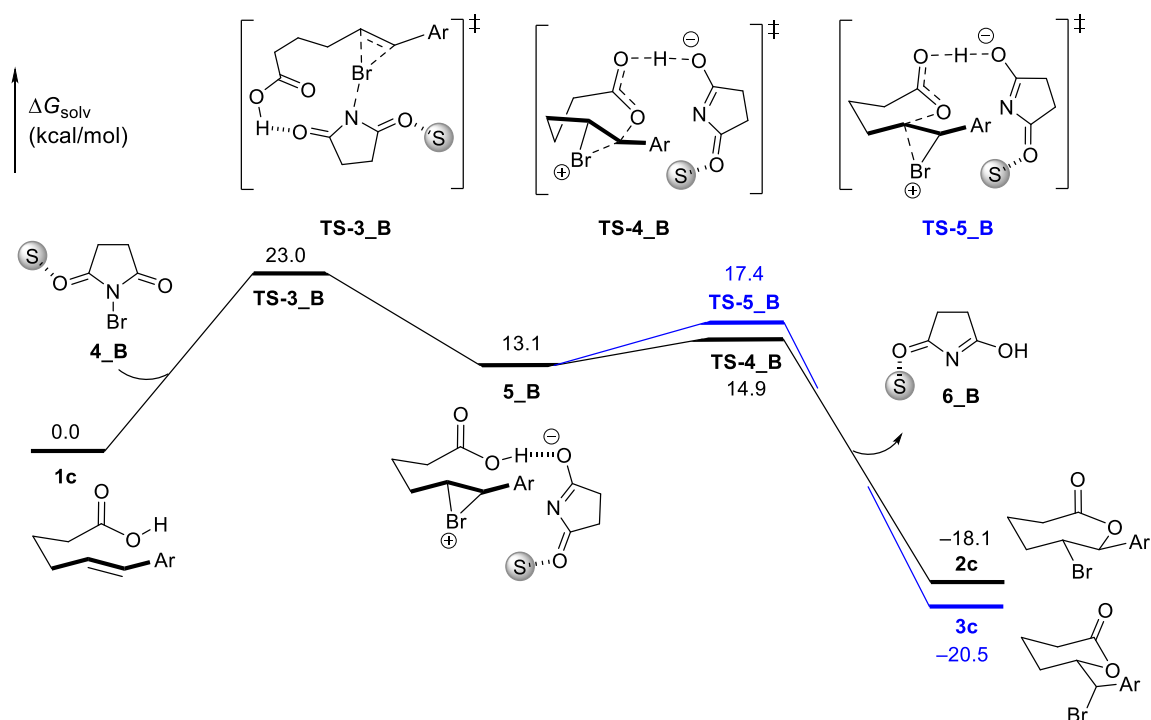

**Figure S2** Computed free energy profile for the stepwise bromolactonization in HFIP. One HFIP solvent molecule was included in DFT calculations.

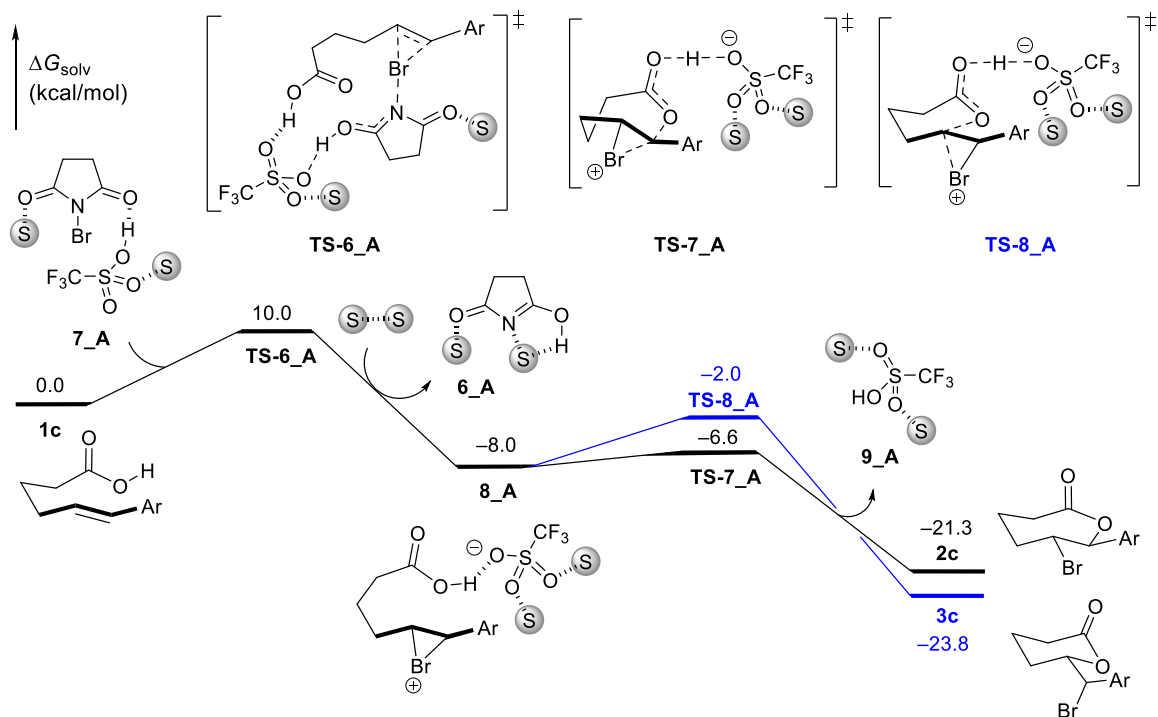

**Figure S3.** Computed free energy profile for the stepwise bromolactonization in HFIP catalyzed by TfOH. Two HFIP solvent molecules were included in DFT calculations.

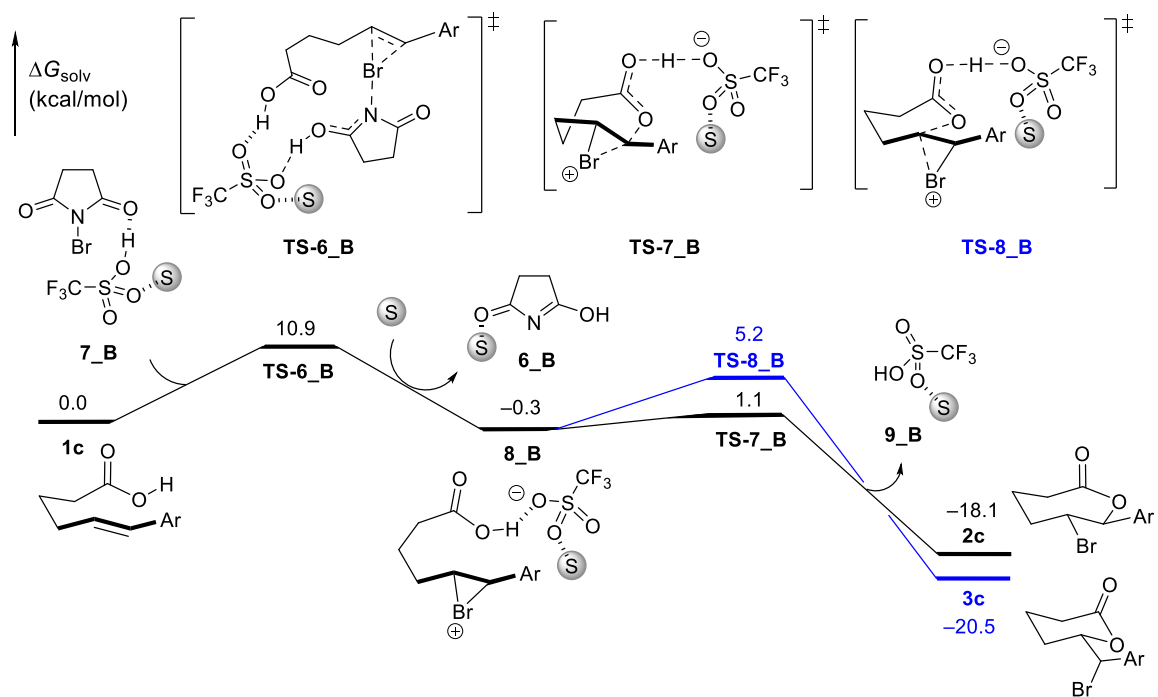

**Figure S4.** Computed free energy profile for the stepwise bromolactonization in HFIP catalyzed by TfOH. One HFIP solvent molecule was included in DFT calculations.

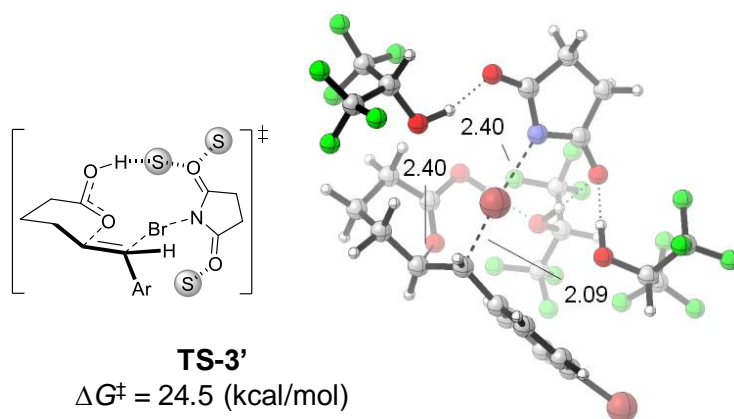

**Figure S5.** Optimized transition state for the concerted bromolactonization in HFIP leading to the *exo*-cyclic product.

## Bromolactonization of **11** in HFIP

We turned our effort into calculating the preferred pathways for the bromolactonization of **11** in HFIP. Similar to the reaction of **1c**, we could not locate the concerted transition state giving *endo*-cyclic product. Moreover, the bromine atom transition state **TS-9** giving six-membered ring product, i.e., *endo*-cyclization, is calculated to be 12.1 kcal/mol lower in energy than the *syn*-concerted addition pathway **TS-10**, which leads to five-membered ring product, i.e., *exo*-cyclization. This result indicates that the stepwise mechanism is also the favorable pathway for the reaction of **11** in HFIP.

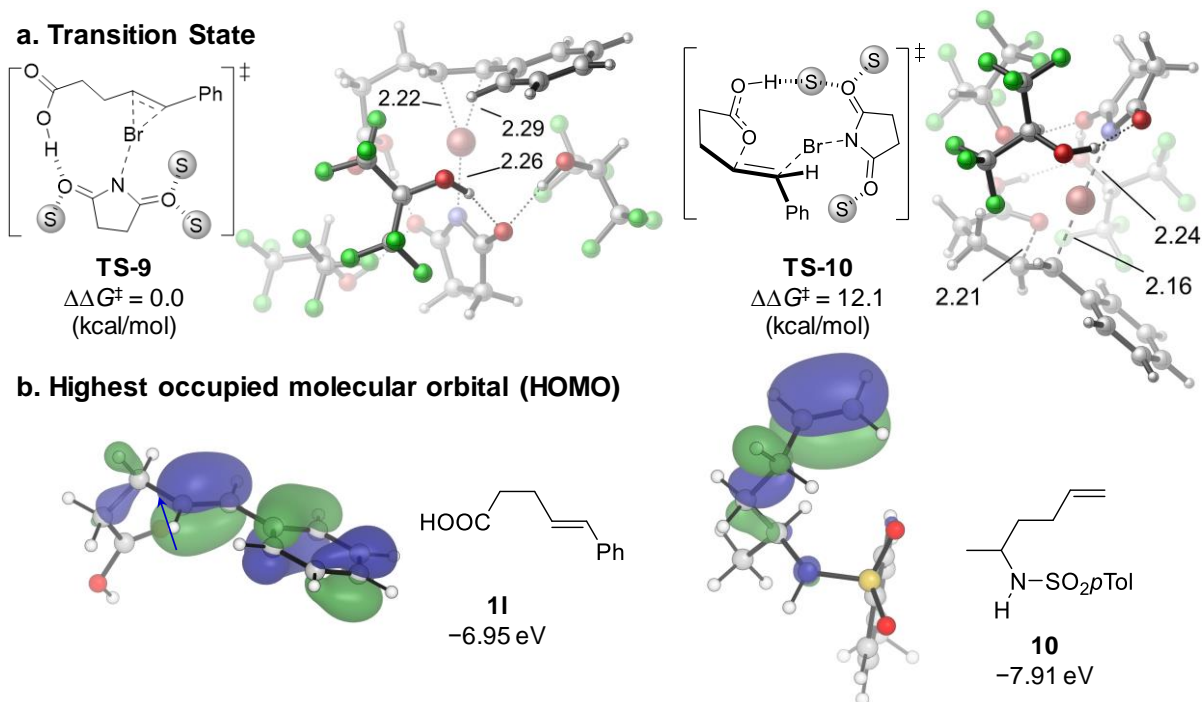

**Figure S6.** (a) Optimized transition state for the electrophilic addition of bromine atom, **TS-9**, and concerted bromolactonization, **TS-10**, leading to *exo*-cyclic product of **11** and NBS in HFIP. Free energy values are relative to **TS-9**. (b) Highest occupied molecular orbital (HOMO) of **11** and *N*-tosylaminoalkene **10** calculated at MN15/6-311+G(2d,2p)//M06-2X/6-31G(d,p) level of theory.

In a previous study, by using DFT calculation, Lebœuf and Gandon found that the reaction of *N*-tosylaminoalkene in HFIP takes place via a concerted mechanism giving five-membered ring product.<sup>13</sup> Our DFT calculations showed that *N*-tosylaminoalkene **10** has a low-energy HOMO; whereas the HOMO of **11** is calculated to be much higher in energy than that of **10**. This result indicates that the C=C double bond in **11** is prone to undergo electrophilic addition and, thus, the stepwise mechanism is expected to be more favorable than the concerted manner for **11**.

## References

- (1) Frisch, M. J.; Trucks, G. W.; Schlegel, H. B.; Scuseria, G. E.; Robb, M. A.; Cheeseman, J. R.; Scalmani, G.; Barone, V.; Petersson, G. A.; Nakatsuji, H.; Li, X.; Caricato, M.; Marenich, A. V.; Bloino, J.; Janesko, B. G.; Gomperts, R.; Mennucci, B.; Hratchian, H. P.; Ortiz, J. V.; Izmaylov, A. F.; Sonnenberg, J. L.; Williams; Ding, F.; Lipparini, F.; Egidi, F.; Goings, J.; Peng, B.; Petrone, A.; Henderson, T.; Ranasinghe, D.; Zakrzewski, V. G.; Gao, J.; Rega, N.; Zheng, G.; Liang, W.; Hada, M.; Ehara, M.; Toyota, K.; Fukuda, R.; Hasegawa, J.; Ishida, M.; Nakajima, T.; Honda, Y.; Kitao, O.; Nakai, H.; Vreven, T.; Throssell, K.; Montgomery Jr., J. A.; Peralta, J. E.; Ogliaro, F.; Bearpark, M. J.; Heyd, J. J.; Brothers, E. N.; Kudin, K. N.; Staroverov, V. N.; Keith, T. A.; Kobayashi, R.; Normand, J.; Raghavachari, K.; Rendell, A. P.; Burant, J. C.; Iyengar, S. S.; Tomasi, J.; Cossi, M.; Millam, J. M.; Klene, M.; Adamo, C.; Cammi, R.; Ochterski, J. W.; Martin, R. L.; Morokuma, K.; Farkas, O.; Foresman, J. B.; Fox, D. J., *Gaussian 16 Rev. C.01*, Wallingford, CT, 2016.
- (2) Zhao, Y.; Truhlar, D. G. *Theor. Chem. Acc.* **2008**, *120*, 215-241.
- (3) Ribeiro, R. F.; Marenich, A. V.; Cramer, C. J.; Truhlar, D. G. *J. Phys. Chem. B* **2011**, *115*, 14556-14562.
- (4) Luchini, G.; Alegre-Requena, J. V.; Funes-Ardoiz, I.; Paton, R. S. *F1000 Research* **2020**, *9*, 219.
- (5) Yu, H. S.; He, X.; Li, S. L.; Truhlar, D. G. *Chem. Sci.* **2016**, *7*, 5032-5051.
- (6) Marenich, A. V.; Cramer, C. J.; Truhlar, D. G., *J. Phys. Chem. B* **2009**, *113*, 6378-6396.
- (7) Lide, D. R. *CRC Handbook of Chemistry and Physics, 87th Edition*, 87th ed.; CRC Press: Boca Raton, FL, 2006.
- (8) In SMD calculations in Gaussian, the "EpsInf" parameter is the square of the solvent's refractive index at 293 K. Because the refractive index of HFIP at 293 K is not available, the refractive index at 298 K ( $n_D^{25} = 1.275$ ) was used. See: Parrish, J. R.; Blout, E. R. *Biopolymers* **1971**, *10*, 1491-1512.
- (9) a) Abraham, M. H. *J. Phys. Org. Chem.* **1993**, *6*, 660-684. b) Abraham, M. H.; Chadha, H. S.; Whiting, G. S.; Mitchell, R. C. *J. Pharm. Sci.* **1994**, *83*, 1085-1100.
- (10) Wohlfarth, C.; Wohlfarth, B. *Surface Tension of Pure Liquids and Binary Liquid Mixtures*; Lechner, M. D., Ed.; Landolt-Börnstein: Numerical Data and Functional Relationships in Science and Technology - New Series, Vol. 16; Springer-Verlag: Berlin/Heidelberg, 1997.
- (11) Pracht, P.; Bohle, F.; Grimme, S. *Phys. Chem. Chem. Phys.* **2020**, *22*, 7169-7192.

- (12) Bannwarth, C.; Ehlert, S.; Grimme, S. *J. Chem. Theory Comput.* **2019**, *15*, 1652–1671.
- (13) C. Qi, G. Force, V. Gandon and D. Leboeuf, Hexafluoroisopropanol-Promoted Haloamidation and Halolactonization of Unactivated Alkenes, *Angew. Chem. Int. Ed.*, 2021, **60**, 946-953.



## Energy and Cartesian Coordinate

1c

M06-2X SCF energy (au): -3187.11248096  
M06-2X enthalpy (au): -3186.87051496  
M06-2X free energy (au): -3186.92944396  
MN15 SCF energy (au): -3189.57415899  
MN15 enthalpy (au): -3189.33219299  
MN15 free energy (au): -3189.39112199  
MN15 free energy (quasi-harmonic) (au): -3189.38840203

Cartesian coordinates

| ATOM | X         | Y         | Z         |
|------|-----------|-----------|-----------|
| C    | 1.874692  | -1.430674 | 0.196320  |
| C    | 2.778278  | -1.258632 | -0.774984 |
| H    | 2.177283  | -1.927834 | 1.118685  |
| H    | 2.477866  | -0.790766 | -1.713484 |
| C    | 4.235361  | -1.576457 | -0.625927 |
| H    | 4.390331  | -2.167079 | 0.284603  |
| H    | 4.586407  | -2.174708 | -1.474576 |
| C    | 5.080844  | -0.292219 | -0.542797 |
| H    | 6.128721  | -0.564104 | -0.387590 |
| H    | 5.024411  | 0.257023  | -1.488897 |
| C    | 4.626779  | 0.629097  | 0.589999  |
| H    | 5.387675  | 1.394740  | 0.784819  |
| H    | 4.471802  | 0.078713  | 1.522638  |
| C    | 3.366686  | 1.381877  | 0.248004  |
| O    | 3.097162  | 1.814717  | -0.855542 |
| O    | 2.567315  | 1.572868  | 1.304081  |
| H    | 1.797643  | 2.096838  | 1.019512  |
| C    | 0.470505  | -0.988730 | 0.135452  |
| C    | -0.493473 | -1.618344 | 0.933227  |
| C    | 0.066505  | 0.078079  | -0.681122 |
| C    | -1.827174 | -1.225255 | 0.900716  |
| H    | -0.196343 | -2.435050 | 1.585562  |
| C    | -1.262679 | 0.483305  | -0.724054 |
| H    | 0.801729  | 0.617186  | -1.272295 |
| C    | -2.197536 | -0.177701 | 0.065727  |
| H    | -2.565465 | -1.726135 | 1.517488  |
| H    | -1.564584 | 1.311258  | -1.356276 |
| Br   | -4.013461 | 0.376426  | 0.015311  |

2c

M06-2X SCF energy (au): -5758.30774024  
M06-2X enthalpy (au): -5758.07276324  
M06-2X free energy (au): -5758.13348024  
MN15 SCF energy (au): -5763.52991637  
MN15 enthalpy (au): -5763.29493937  
MN15 free energy (au): -5763.35565637  
MN15 free energy (quasi-harmonic) (au): -5763.35194613

Cartesian coordinates

| ATOM | X        | Y         | Z        |
|------|----------|-----------|----------|
| C    | 1.329620 | -0.814377 | 0.639512 |
| C    | 1.969725 | 0.515896  | 1.074775 |
| H    | 1.269375 | 1.017745  | 1.743973 |
| H    | 1.506869 | -1.534818 | 1.448509 |
| C    | 3.324457 | 0.393918  | 1.756189 |

|    |           |           |           |
|----|-----------|-----------|-----------|
| H  | 3.642773  | 1.389634  | 2.077663  |
| H  | 3.157104  | -0.200570 | 2.664413  |
| C  | 4.421304  | -0.256052 | 0.922411  |
| H  | 4.660015  | 0.370767  | 0.056137  |
| H  | 5.327258  | -0.314965 | 1.530950  |
| C  | 4.074947  | -1.677472 | 0.451620  |
| H  | 3.630267  | -2.251482 | 1.273028  |
| H  | 4.976208  | -2.196307 | 0.123005  |
| C  | 3.148462  | -1.694045 | -0.735203 |
| O  | 1.862325  | -1.319284 | -0.584328 |
| O  | 3.493168  | -2.033974 | -1.844966 |
| C  | -0.160403 | -0.666967 | 0.428685  |
| C  | -0.692067 | -0.398930 | -0.833147 |
| C  | -1.012389 | -0.747170 | 1.530753  |
| C  | -2.062419 | -0.215760 | -0.994741 |
| H  | -0.036471 | -0.337560 | -1.694812 |
| C  | -2.383427 | -0.562576 | 1.384545  |
| H  | -0.605515 | -0.960529 | 2.516071  |
| C  | -2.891255 | -0.298180 | 0.117727  |
| H  | -2.476010 | -0.011224 | -1.976181 |
| H  | -3.043501 | -0.630854 | 2.242116  |
| Br | -4.761234 | -0.050240 | -0.098178 |
| Br | 2.096404  | 1.704008  | -0.490235 |

3c

|                                         |                |
|-----------------------------------------|----------------|
| M06-2X SCF energy (au):                 | -5758.30602251 |
| M06-2X enthalpy (au):                   | -5758.07136751 |
| M06-2X free energy (au):                | -5758.13296851 |
| MN15 SCF energy (au):                   | -5763.53227286 |
| MN15 enthalpy (au):                     | -5763.29761786 |
| MN15 free energy (au):                  | -5763.35921886 |
| MN15 free energy (quasi-harmonic) (au): | -5763.35590235 |

Cartesian coordinates

| ATOM | X         | Y         | Z         |
|------|-----------|-----------|-----------|
| C    | 1.194019  | 0.310854  | 0.764454  |
| C    | 1.802080  | 1.172445  | -0.340513 |
| H    | 1.194236  | 0.878189  | 1.696799  |
| H    | 1.962365  | 0.563831  | -1.239142 |
| C    | 0.921888  | 2.365841  | -0.680001 |
| H    | 0.006943  | 1.998873  | -1.151124 |
| H    | 0.641747  | 2.892796  | 0.241495  |
| C    | 1.686889  | 3.296216  | -1.612667 |
| H    | 1.969387  | 2.752280  | -2.521086 |
| H    | 1.063653  | 4.140421  | -1.916196 |
| C    | 2.930536  | 3.801740  | -0.894128 |
| H    | 2.650656  | 4.527920  | -0.120279 |
| H    | 3.637282  | 4.302613  | -1.559285 |
| C    | 3.700352  | 2.729636  | -0.166309 |
| O    | 3.103274  | 1.564382  | 0.137730  |
| O    | 4.840816  | 2.887480  | 0.214232  |
| C    | -0.187889 | -0.174099 | 0.426865  |
| C    | -0.404958 | -1.054686 | -0.637310 |
| C    | -1.280197 | 0.316063  | 1.141826  |
| C    | -1.693586 | -1.436225 | -0.987946 |
| H    | 0.438984  | -1.462252 | -1.187148 |
| C    | -2.578147 | -0.061143 | 0.804917  |
| H    | -1.121220 | 1.000065  | 1.970709  |
| C    | -2.767569 | -0.932896 | -0.258763 |

|    |           |           |           |
|----|-----------|-----------|-----------|
| H  | -1.860045 | -2.119832 | -1.813006 |
| H  | -3.424495 | 0.319202  | 1.365990  |
| Br | -4.530080 | -1.458195 | -0.725238 |
| Br | 2.382010  | -1.229109 | 1.117902  |

4

|                                         |                |
|-----------------------------------------|----------------|
| M06-2X SCF energy (au):                 | -5300.36195533 |
| M06-2X enthalpy (au):                   | -5300.04309933 |
| M06-2X free energy (au):                | -5300.16303533 |
| MN15 SCF energy (au):                   | -5302.57856839 |
| MN15 enthalpy (au):                     | -5302.25971239 |
| MN15 free energy (au):                  | -5302.37964839 |
| MN15 free energy (quasi-harmonic) (au): | -5302.36462606 |

Cartesian coordinates

| ATOM | X         | Y         | Z         |
|------|-----------|-----------|-----------|
| N    | -0.999090 | -0.298459 | 0.525942  |
| Br   | -0.879790 | -0.837220 | 2.274996  |
| C    | -2.205606 | 0.089567  | -0.073046 |
| C    | -1.889784 | 0.439734  | -1.507164 |
| C    | -0.381031 | 0.213347  | -1.663457 |
| C    | 0.091709  | -0.257703 | -0.314955 |
| O    | 1.222469  | -0.561533 | 0.022797  |
| O    | -3.253243 | 0.103020  | 0.524099  |
| H    | -2.489268 | -0.205378 | -2.152973 |
| H    | -2.190586 | 1.473772  | -1.684007 |
| H    | 0.170563  | 1.121159  | -1.919690 |
| H    | -0.129852 | -0.554601 | -2.399400 |
| O    | 2.309300  | -1.908649 | 2.259294  |
| H    | 1.914802  | -1.387188 | 1.533276  |
| C    | 2.450893  | -3.238769 | 1.865866  |
| H    | 2.874290  | -3.805659 | 2.700344  |
| C    | 1.093249  | -3.858941 | 1.548806  |
| C    | 3.432338  | -3.351788 | 0.702961  |
| F    | 0.469193  | -3.206758 | 0.554259  |
| F    | 1.201682  | -5.140693 | 1.187405  |
| F    | 0.304036  | -3.799506 | 2.625212  |
| F    | 4.606658  | -2.823703 | 1.052057  |
| F    | 2.990832  | -2.690803 | -0.378766 |
| F    | 3.641247  | -4.622411 | 0.343446  |
| O    | -5.833617 | 1.192501  | 0.647391  |
| H    | -4.968646 | 0.754115  | 0.529093  |
| C    | -5.947182 | 2.248890  | -0.255294 |
| H    | -6.921026 | 2.728090  | -0.117490 |
| C    | -4.882443 | 3.307525  | 0.013723  |
| C    | -5.891705 | 1.722138  | -1.684484 |
| F    | -3.645073 | 2.832809  | -0.208324 |
| F    | -5.045991 | 4.386940  | -0.756681 |
| F    | -4.938854 | 3.694973  | 1.289035  |
| F    | -5.945331 | 2.702824  | -2.589887 |
| F    | -6.913544 | 0.893167  | -1.906661 |
| F    | -4.760640 | 1.028624  | -1.897357 |
| O    | 2.869196  | -0.466994 | -2.171709 |
| H    | 2.332500  | -0.577578 | -1.357796 |
| C    | 3.895982  | 0.440080  | -1.913326 |
| H    | 4.542850  | 0.509242  | -2.792794 |
| C    | 3.324923  | 1.831538  | -1.658428 |
| C    | 4.748438  | -0.055909 | -0.749686 |
| F    | 4.285113  | 2.750752  | -1.523639 |

|   |          |           |           |
|---|----------|-----------|-----------|
| F | 2.545620 | 2.195467  | -2.682990 |
| F | 2.568835 | 1.861304  | -0.550953 |
| F | 5.729485 | 0.798965  | -0.443101 |
| F | 5.301750 | -1.230025 | -1.059865 |
| F | 4.002992 | -0.235065 | 0.351849  |

#### 4\_A

|                                         |                |
|-----------------------------------------|----------------|
| M06-2X SCF energy (au):                 | -4510.79338285 |
| M06-2X enthalpy (au):                   | -4510.55074385 |
| M06-2X free energy (au):                | -4510.64754485 |
| MN15 SCF energy (au):                   | -4513.15010732 |
| MN15 enthalpy (au):                     | -4512.90746832 |
| MN15 free energy (au):                  | -4513.00426932 |
| MN15 free energy (quasi-harmonic) (au): | -4512.99245647 |

#### Cartesian coordinates

| ATOM | X         | Y         | Z         |
|------|-----------|-----------|-----------|
| N    | -0.019599 | -0.226539 | -1.346767 |
| Br   | -0.222121 | -1.790661 | -2.284084 |
| C    | -0.909391 | 0.835347  | -1.465938 |
| C    | -0.455273 | 1.905175  | -0.506037 |
| C    | 0.683704  | 1.272231  | 0.301467  |
| C    | 0.919765  | -0.080864 | -0.325977 |
| O    | 1.724667  | -0.937416 | -0.044570 |
| O    | -1.858401 | 0.837228  | -2.219660 |
| H    | -0.127288 | 2.764214  | -1.097322 |
| H    | -1.311857 | 2.210599  | 0.098409  |
| H    | 0.418049  | 1.105046  | 1.348859  |
| H    | 1.611498  | 1.844122  | 0.272853  |
| O    | 4.271290  | -1.413598 | 0.957177  |
| H    | 3.332052  | -1.231929 | 0.757777  |
| C    | 4.987262  | -0.218305 | 0.963999  |
| H    | 6.036720  | -0.439009 | 1.180309  |
| C    | 4.951905  | 0.465771  | -0.400937 |
| C    | 4.469926  | 0.693147  | 2.070720  |
| F    | 5.242831  | -0.414519 | -1.359134 |
| F    | 3.741277  | 0.980434  | -0.678305 |
| F    | 5.836177  | 1.465805  | -0.471231 |
| F    | 5.037397  | 1.902816  | 2.035016  |
| F    | 4.715098  | 0.152226  | 3.265737  |
| F    | 3.140464  | 0.859832  | 1.973294  |
| O    | -3.816526 | 1.569782  | -0.413518 |
| H    | -3.332229 | 1.632900  | -1.254999 |
| C    | -4.142591 | 0.227454  | -0.196951 |
| H    | -3.884876 | -0.423888 | -1.039488 |
| C    | -3.368433 | -0.259599 | 1.022318  |
| C    | -5.649635 | 0.150167  | 0.013162  |
| F    | -2.049216 | -0.268770 | 0.751073  |
| F    | -3.551224 | 0.542281  | 2.073196  |
| F    | -3.712800 | -1.499265 | 1.377738  |
| F    | -6.061788 | -1.103846 | 0.226048  |
| F    | -6.279643 | 0.614032  | -1.069282 |
| F    | -6.034391 | 0.892779  | 1.057655  |

#### 4\_B

|                          |                |
|--------------------------|----------------|
| M06-2X SCF energy (au):  | -3721.23092289 |
| M06-2X enthalpy (au):    | -3721.06446689 |
| M06-2X free energy (au): | -3721.13413489 |
| MN15 SCF energy (au):    | -3723.72299869 |

MN15 enthalpy (au): -3723.55654269  
MN15 free energy (au): -3723.62621069  
MN15 free energy (quasi-harmonic) (au): -3723.62061580

Cartesian coordinates

| ATOM | X         | Y         | Z         |
|------|-----------|-----------|-----------|
| N    | -2.436986 | 0.679490  | -0.294203 |
| Br   | -3.065594 | 0.292719  | -1.974293 |
| C    | -3.100695 | 1.557005  | 0.573891  |
| C    | -2.285693 | 1.606762  | 1.844162  |
| C    | -1.093962 | 0.669832  | 1.612932  |
| C    | -1.274957 | 0.118517  | 0.218706  |
| O    | -0.587657 | -0.665886 | -0.396702 |
| O    | -4.123341 | 2.130940  | 0.298158  |
| H    | -1.990376 | 2.643763  | 2.017939  |
| H    | -2.926125 | 1.292063  | 2.670999  |
| H    | -1.064806 | -0.171448 | 2.308857  |
| H    | -0.129917 | 1.179692  | 1.656232  |
| O    | 1.912067  | -1.828376 | -0.576097 |
| H    | 1.024891  | -1.463265 | -0.381820 |
| C    | 2.880024  | -1.075364 | 0.085777  |
| H    | 3.868457  | -1.478733 | -0.153198 |
| C    | 2.858188  | 0.374703  | -0.387147 |
| C    | 2.687550  | -1.193305 | 1.592852  |
| F    | 2.947822  | 0.420545  | -1.717385 |
| F    | 1.717449  | 0.993227  | -0.038423 |
| F    | 3.872344  | 1.080304  | 0.122656  |
| F    | 3.552421  | -0.439054 | 2.277130  |
| F    | 2.846792  | -2.461642 | 1.976360  |
| F    | 1.446633  | -0.820517 | 1.948816  |

5

M06-2X SCF energy (au): -8487.49508747  
M06-2X enthalpy (au): -8486.93465447  
M06-2X free energy (au): -8487.08782647  
MN15 SCF energy (au): -8492.16983773  
MN15 enthalpy (au): -8491.60940473  
MN15 free energy (au): -8491.76257673  
MN15 free energy (quasi-harmonic) (au): -8491.74317126

Cartesian coordinates

| ATOM | X        | Y         | Z         |
|------|----------|-----------|-----------|
| C    | 2.716707 | -2.355796 | -0.596535 |
| C    | 4.088102 | -2.217781 | -0.063931 |
| H    | 2.314543 | -3.369775 | -0.559096 |
| H    | 4.439178 | -1.196778 | 0.065157  |
| C    | 4.451637 | -3.148577 | 1.083306  |
| H    | 3.996300 | -4.127997 | 0.896314  |
| H    | 5.536315 | -3.282979 | 1.077487  |
| C    | 4.026886 | -2.622235 | 2.460317  |
| H    | 4.288192 | -3.397967 | 3.184663  |
| H    | 4.615286 | -1.734724 | 2.711104  |
| C    | 2.543278 | -2.292967 | 2.595854  |
| H    | 2.215214 | -2.365668 | 3.638750  |
| H    | 1.911139 | -2.999786 | 2.042274  |
| C    | 2.198445 | -0.895702 | 2.138292  |
| O    | 0.917305 | -0.609518 | 2.247357  |
| O    | 3.022634 | -0.102144 | 1.704982  |
| C    | 1.924103 | -1.370111 | -1.181791 |

|    |           |           |           |
|----|-----------|-----------|-----------|
| C  | 0.695213  | -1.782197 | -1.779727 |
| C  | 2.319705  | -0.001377 | -1.251982 |
| C  | -0.096473 | -0.877582 | -2.447365 |
| H  | 0.393049  | -2.822435 | -1.716199 |
| C  | 1.526392  | 0.903172  | -1.915949 |
| H  | 3.230853  | 0.345949  | -0.776910 |
| C  | 0.334473  | 0.452351  | -2.505002 |
| H  | -1.034476 | -1.177176 | -2.900142 |
| H  | 1.813152  | 1.947437  | -1.976275 |
| Br | -0.744642 | 1.698617  | -3.386867 |
| Br | 4.936576  | -2.883944 | -1.746137 |
| H  | 0.760012  | 0.339485  | 1.900399  |
| N  | -1.102426 | 0.547572  | 0.246661  |
| C  | -0.530264 | 1.700225  | 0.615474  |
| C  | -1.233560 | 2.931060  | 0.074640  |
| C  | -2.524791 | 2.333747  | -0.481172 |
| C  | -2.200760 | 0.850374  | -0.483805 |
| O  | -2.858055 | -0.016663 | -1.088180 |
| O  | 0.507983  | 1.756118  | 1.324474  |
| H  | -1.362960 | 3.674133  | 0.863281  |
| H  | -0.606722 | 3.375087  | -0.707810 |
| H  | -2.816969 | 2.678874  | -1.473463 |
| H  | -3.372155 | 2.487750  | 0.194015  |
| O  | -2.157603 | -2.508388 | -0.307648 |
| H  | -2.363982 | -1.584420 | -0.598901 |
| C  | -1.486217 | -2.466109 | 0.912721  |
| H  | -0.671447 | -1.732955 | 0.938101  |
| C  | -2.446344 | -2.105381 | 2.043911  |
| C  | -0.889097 | -3.845181 | 1.135061  |
| F  | -3.343069 | -3.077070 | 2.270661  |
| F  | -1.793802 | -1.878821 | 3.191277  |
| F  | -3.128560 | -0.999015 | 1.737312  |
| F  | -0.391575 | -3.971057 | 2.372646  |
| F  | 0.123944  | -4.062856 | 0.275862  |
| F  | -1.778039 | -4.822044 | 0.947585  |
| O  | 2.806231  | 2.685327  | 0.258588  |
| H  | 1.925635  | 2.384295  | 0.576256  |
| C  | 3.613790  | 2.862552  | 1.381320  |
| H  | 3.389699  | 2.155401  | 2.187840  |
| C  | 5.045885  | 2.615840  | 0.938035  |
| C  | 3.410354  | 4.271587  | 1.923059  |
| F  | 5.911933  | 2.831123  | 1.934120  |
| F  | 5.196567  | 1.348417  | 0.530461  |
| F  | 5.390501  | 3.405177  | -0.085397 |
| F  | 2.116126  | 4.443343  | 2.221957  |
| F  | 3.744332  | 5.208406  | 1.027669  |
| F  | 4.123102  | 4.494461  | 3.033197  |
| O  | -5.148209 | -0.207476 | -2.373804 |
| H  | -4.283469 | 0.066473  | -1.981744 |
| C  | -6.165323 | -0.015641 | -1.444538 |
| H  | -7.039356 | -0.602206 | -1.744717 |
| C  | -5.782066 | -0.481317 | -0.036490 |
| C  | -6.586520 | 1.450056  | -1.428938 |
| F  | -5.051352 | 0.434077  | 0.620047  |
| F  | -6.874446 | -0.711397 | 0.703079  |
| F  | -5.075485 | -1.611040 | -0.095983 |
| F  | -7.452169 | 1.706596  | -0.439348 |
| F  | -7.170294 | 1.777571  | -2.585345 |
| F  | -5.531835 | 2.263121  | -1.272905 |

5\_A

M06-2X SCF energy (au): -7697.92906262  
M06-2X enthalpy (au): -7697.44382862  
M06-2X free energy (au): -7697.57044362  
MN15 SCF energy (au): -7702.74022612  
MN15 enthalpy (au): -7702.25499212  
MN15 free energy (au): -7702.38160712  
MN15 free energy (quasi-harmonic) (au): -7702.36886950

Cartesian coordinates

| ATOM | X         | Y         | Z         |
|------|-----------|-----------|-----------|
| C    | 0.393576  | -3.000379 | 0.060677  |
| C    | 1.551834  | -3.401837 | 0.883666  |
| H    | -0.487369 | -3.637985 | 0.157655  |
| H    | 2.355653  | -2.668460 | 0.929463  |
| C    | 1.194898  | -4.000183 | 2.238199  |
| H    | 0.339584  | -4.672775 | 2.106472  |
| H    | 2.041648  | -4.603880 | 2.574988  |
| C    | 0.880469  | -2.943270 | 3.307050  |
| H    | 0.564275  | -3.487033 | 4.200922  |
| H    | 1.793592  | -2.399908 | 3.566626  |
| C    | -0.201290 | -1.935683 | 2.924460  |
| H    | -0.660068 | -1.503262 | 3.822087  |
| H    | -1.027232 | -2.391954 | 2.366151  |
| C    | 0.326776  | -0.761641 | 2.132109  |
| O    | -0.618652 | -0.044467 | 1.562941  |
| O    | 1.518681  | -0.504724 | 2.028397  |
| C    | 0.294742  | -1.897890 | -0.779310 |
| C    | -0.997008 | -1.613402 | -1.308916 |
| C    | 1.370163  | -0.987331 | -1.007029 |
| C    | -1.225872 | -0.442338 | -1.995167 |
| H    | -1.805273 | -2.315530 | -1.133464 |
| C    | 1.147206  | 0.172268  | -1.707165 |
| H    | 2.368302  | -1.206374 | -0.640456 |
| C    | -0.151602 | 0.432864  | -2.180605 |
| H    | -2.207584 | -0.195362 | -2.381486 |
| H    | 1.943917  | 0.889550  | -1.871686 |
| Br   | -0.458839 | 2.020363  | -3.116077 |
| Br   | 2.162462  | -4.838300 | -0.351554 |
| H    | -0.217203 | 0.780133  | 1.115929  |
| N    | -1.942651 | 2.296601  | 0.107012  |
| C    | -0.698095 | 2.778336  | 0.095461  |
| C    | -0.582762 | 4.200266  | -0.420210 |
| C    | -2.000805 | 4.471724  | -0.915473 |
| C    | -2.756774 | 3.234935  | -0.447697 |
| O    | -3.981931 | 3.096960  | -0.564822 |
| O    | 0.296146  | 2.112059  | 0.488642  |
| H    | -0.289972 | 4.845913  | 0.413199  |
| H    | 0.196782  | 4.266249  | -1.183144 |
| H    | -2.074171 | 4.540433  | -2.005239 |
| H    | -2.463973 | 5.366613  | -0.495041 |
| O    | -4.732490 | 1.007759  | 0.888797  |
| H    | -4.484998 | 1.823442  | 0.371194  |
| C    | -3.991162 | -0.054000 | 0.377413  |
| H    | -2.971623 | 0.241929  | 0.096203  |
| C    | -3.871560 | -1.105534 | 1.466780  |
| C    | -4.692172 | -0.590184 | -0.864447 |
| F    | -5.060301 | -1.610583 | 1.818868  |

|   |           |           |           |
|---|-----------|-----------|-----------|
| F | -3.102035 | -2.134922 | 1.063816  |
| F | -3.314603 | -0.586647 | 2.561934  |
| F | -4.066428 | -1.659664 | -1.389632 |
| F | -4.711844 | 0.362687  | -1.807673 |
| F | -5.956699 | -0.944574 | -0.624137 |
| O | 2.796581  | 2.677580  | -0.038529 |
| H | 1.817586  | 2.610982  | 0.108684  |
| C | 3.362184  | 1.620888  | 0.674798  |
| H | 2.740157  | 0.718933  | 0.682691  |
| C | 4.672781  | 1.273685  | -0.004905 |
| C | 3.547284  | 2.018223  | 2.133456  |
| F | 5.366518  | 0.362548  | 0.688132  |
| F | 4.431326  | 0.760266  | -1.221140 |
| F | 5.451903  | 2.346339  | -0.168907 |
| F | 4.415406  | 3.029672  | 2.271317  |
| F | 3.987314  | 0.998147  | 2.880039  |
| F | 2.374606  | 2.419509  | 2.637386  |

#### 5\_B

M06-2X SCF energy (au): -6908.35751154  
M06-2X enthalpy (au): -6907.94883154  
M06-2X free energy (au): -6908.05061754  
MN15 SCF energy (au): -6913.30323764  
MN15 enthalpy (au): -6912.89455764  
MN15 free energy (au): -6912.99634364  
MN15 free energy (quasi-harmonic) (au): -6912.98820010

#### Cartesian coordinates

| ATOM | X         | Y         | Z         |
|------|-----------|-----------|-----------|
| C    | -2.736574 | -0.187317 | 0.347778  |
| C    | -3.834667 | -0.303204 | -0.633665 |
| H    | -2.741401 | -0.940580 | 1.138486  |
| H    | -3.742847 | 0.345519  | -1.502647 |
| C    | -4.236580 | -1.729266 | -0.983146 |
| H    | -4.249634 | -2.324691 | -0.063151 |
| H    | -5.256170 | -1.706329 | -1.376616 |
| C    | -3.311965 | -2.377116 | -2.022751 |
| H    | -3.645243 | -3.411872 | -2.137185 |
| H    | -3.447420 | -1.885826 | -2.990657 |
| C    | -1.828201 | -2.363826 | -1.663920 |
| H    | -1.300868 | -3.184616 | -2.163686 |
| H    | -1.650413 | -2.518172 | -0.591615 |
| C    | -1.113814 | -1.098606 | -2.086885 |
| O    | 0.109222  | -1.004957 | -1.613646 |
| O    | -1.624278 | -0.241481 | -2.796373 |
| C    | -1.715946 | 0.754319  | 0.370469  |
| C    | -1.569693 | 1.772698  | -0.618552 |
| C    | -0.729210 | 0.614263  | 1.390888  |
| C    | -0.478181 | 2.605173  | -0.582359 |
| H    | -2.308584 | 1.897471  | -1.401953 |
| C    | 0.378878  | 1.426771  | 1.410213  |
| H    | -0.864040 | -0.148173 | 2.149910  |
| C    | 0.480966  | 2.419180  | 0.426993  |
| H    | -0.347918 | 3.383514  | -1.324973 |
| H    | 1.152447  | 1.308086  | 2.160414  |
| Br   | 1.955702  | 3.565196  | 0.469909  |
| Br   | -5.219619 | 0.521610  | 0.534605  |
| H    | 0.575376  | -0.159886 | -1.996113 |
| N    | 2.649876  | 0.422128  | -0.786871 |



|   |           |           |           |
|---|-----------|-----------|-----------|
| C | 2.390429  | 1.116405  | -1.907364 |
| C | 3.499905  | 2.080509  | -2.299537 |
| C | 4.524439  | 1.869571  | -1.188206 |
| C | 3.846152  | 0.831922  | -0.302312 |
| O | 4.342251  | 0.402889  | 0.751298  |
| O | 1.333569  | 0.997061  | -2.567228 |
| H | 3.866011  | 1.820140  | -3.295878 |
| H | 3.096701  | 3.095701  | -2.348044 |
| H | 4.745376  | 2.766021  | -0.602898 |
| H | 5.476251  | 1.464016  | -1.541171 |
| O | 3.130662  | -1.854506 | 1.437949  |
| H | 3.483874  | -0.957047 | 1.189944  |
| C | 1.858745  | -2.051376 | 0.904807  |
| H | 1.469186  | -1.172527 | 0.378933  |
| C | 1.939896  | -3.187316 | -0.106645 |
| C | 0.912012  | -2.385459 | 2.044543  |
| F | 0.728508  | -3.614028 | -0.496476 |
| F | 2.606209  | -2.789810 | -1.194065 |
| F | 2.588559  | -4.247253 | 0.396202  |
| F | -0.366640 | -2.466856 | 1.630996  |
| F | 0.963773  | -1.425255 | 2.979846  |
| F | 1.214462  | -3.543391 | 2.641997  |

6

M06-2X SCF energy (au): -2729.21786467  
M06-2X enthalpy (au): -2728.88944067  
M06-2X free energy (au): -2729.00009467  
MN15 SCF energy (au): -2728.66429327  
MN15 enthalpy (au): -2728.33586927  
MN15 free energy (au): -2728.44652327  
MN15 free energy (quasi-harmonic) (au): -2728.43569460

Cartesian coordinates

| ATOM | X         | Y         | Z         |
|------|-----------|-----------|-----------|
| N    | 0.307219  | 0.507705  | -2.149176 |
| C    | 1.139662  | 0.063620  | -3.047558 |
| C    | 0.571331  | -0.828267 | -4.108432 |
| C    | -0.910958 | -0.834080 | -3.728490 |
| C    | -0.919387 | -0.072356 | -2.418518 |
| O    | -1.863757 | 0.012508  | -1.636355 |
| O    | 2.412547  | 0.342791  | -3.045988 |
| H    | 0.788576  | -0.419327 | -5.097763 |
| H    | 1.043025  | -1.812561 | -4.034933 |
| H    | -1.337007 | -1.827761 | -3.578895 |
| H    | -1.535369 | -0.295522 | -4.446870 |
| H    | 2.645504  | 0.875627  | -2.253881 |
| O    | -2.576499 | -2.668284 | -1.340988 |
| H    | -2.619074 | -1.694279 | -1.417913 |
| C    | -1.823050 | -3.039113 | -0.229474 |
| H    | -1.858209 | -4.128746 | -0.143219 |
| C    | -0.340343 | -2.654694 | -0.342822 |
| C    | -2.420429 | -2.453598 | 1.046739  |
| F    | 0.425144  | -3.453407 | 0.402582  |
| F    | 0.074750  | -2.737300 | -1.611320 |
| F    | -0.115870 | -1.394960 | 0.069947  |
| F    | -3.606511 | -3.006897 | 1.304431  |
| F    | -2.610538 | -1.130460 | 0.933342  |
| F    | -1.619107 | -2.667842 | 2.096921  |
| O    | 2.184709  | 1.225259  | -0.321051 |

|   |           |           |           |
|---|-----------|-----------|-----------|
| H | 1.244542  | 1.189230  | -0.601093 |
| C | 2.372382  | 0.300555  | 0.710406  |
| H | 1.429573  | -0.062626 | 1.129273  |
| C | 3.141878  | -0.898113 | 0.169974  |
| C | 3.116521  | 1.020846  | 1.823502  |
| F | 3.388268  | -1.803766 | 1.120184  |
| F | 2.432646  | -1.501368 | -0.796851 |
| F | 4.310782  | -0.530711 | -0.367180 |
| F | 3.374632  | 0.212169  | 2.856488  |
| F | 2.371232  | 2.037945  | 2.270381  |
| F | 4.278612  | 1.526621  | 1.395875  |
| O | -0.616853 | 1.092362  | 0.603722  |
| H | -1.143893 | 0.703151  | -0.132914 |
| C | -1.120009 | 2.350226  | 0.923383  |
| H | -0.541789 | 2.766164  | 1.753621  |
| C | -0.968773 | 3.297083  | -0.263169 |
| C | -2.569410 | 2.216177  | 1.378467  |
| F | 0.319661  | 3.380481  | -0.614711 |
| F | -1.649500 | 2.857021  | -1.330153 |
| F | -1.398434 | 4.529964  | 0.019997  |
| F | -3.321974 | 1.655794  | 0.420180  |
| F | -3.112779 | 3.395755  | 1.692686  |
| F | -2.636886 | 1.427276  | 2.453598  |

#### 6\_A

M06-2X SCF energy (au): -1939.64871983  
M06-2X enthalpy (au): -1939.39709983  
M06-2X free energy (au): -1939.48584083  
MN15 SCF energy (au): -1939.23381343  
MN15 enthalpy (au): -1938.98219343  
MN15 free energy (au): -1939.07093443  
MN15 free energy (quasi-harmonic) (au): -1939.06287060

#### Cartesian coordinates

| ATOM | X         | Y         | Z         |
|------|-----------|-----------|-----------|
| N    | -0.556690 | 2.442713  | 0.163453  |
| C    | 0.208454  | 3.449953  | -0.135836 |
| C    | -0.146607 | 4.768773  | 0.479708  |
| C    | -1.397294 | 4.397020  | 1.281115  |
| C    | -1.503858 | 2.896765  | 1.072780  |
| O    | -2.282391 | 2.138114  | 1.633419  |
| O    | 1.243902  | 3.350241  | -0.923895 |
| H    | 0.684574  | 5.116392  | 1.099152  |
| H    | -0.315979 | 5.508246  | -0.306660 |
| H    | -2.305885 | 4.873297  | 0.903982  |
| H    | -1.319284 | 4.610400  | 2.348781  |
| H    | 1.342264  | 2.420788  | -1.232665 |
| O    | -1.102993 | -0.306080 | 1.076425  |
| H    | -1.456312 | 0.551409  | 1.396474  |
| C    | -2.181819 | -1.048362 | 0.594416  |
| H    | -3.152429 | -0.637466 | 0.894884  |
| C    | -2.143941 | -1.055160 | -0.929625 |
| C    | -2.064300 | -2.449055 | 1.176048  |
| F    | -1.046703 | -1.663979 | -1.400448 |
| F    | -3.207933 | -1.671563 | -1.453686 |
| F    | -2.131650 | 0.204570  | -1.380409 |
| F    | -2.218724 | -2.408007 | 2.502128  |
| F    | -0.861388 | -2.983237 | 0.927186  |
| F    | -2.990240 | -3.273892 | 0.674983  |

|   |          |           |           |
|---|----------|-----------|-----------|
| O | 0.818464 | 0.541870  | -1.131478 |
| H | 0.081914 | 0.851072  | -0.550790 |
| C | 1.570694 | -0.426687 | -0.463925 |
| H | 0.948720 | -1.153028 | 0.069964  |
| C | 2.355662 | -1.170127 | -1.532436 |
| C | 2.479021 | 0.246626  | 0.558982  |
| F | 1.521972 | -1.832458 | -2.338049 |
| F | 3.068528 | -0.330232 | -2.291664 |
| F | 3.201006 | -2.054643 | -0.991899 |
| F | 3.171560 | -0.641291 | 1.277265  |
| F | 1.735395 | 0.973935  | 1.402712  |
| F | 3.353942 | 1.079352  | -0.021473 |

#### 6\_B

M06-2X SCF energy (au): -1150.07664901  
M06-2X enthalpy (au): -1149.90113501  
M06-2X free energy (au): -1149.96577601  
MN15 SCF energy (au): -1149.80139012  
MN15 enthalpy (au): -1149.62587612  
MN15 free energy (au): -1149.69051712  
MN15 free energy (quasi-harmonic) (au): -1149.68584811

#### Cartesian coordinates

| ATOM | X         | Y         | Z         |
|------|-----------|-----------|-----------|
| N    | 2.238848  | -0.015447 | -0.281013 |
| C    | 3.385815  | -0.548090 | 0.010509  |
| C    | 4.387659  | 0.303929  | 0.728112  |
| C    | 3.610754  | 1.611482  | 0.867331  |
| C    | 2.284670  | 1.291875  | 0.200394  |
| O    | 1.349701  | 2.073589  | 0.089745  |
| O    | 3.712582  | -1.781013 | -0.285669 |
| H    | 4.651310  | -0.165022 | 1.679648  |
| H    | 5.296943  | 0.384897  | 0.127054  |
| H    | 4.075361  | 2.454986  | 0.351873  |
| H    | 3.428666  | 1.906005  | 1.903331  |
| H    | 2.982003  | -2.225596 | -0.752786 |
| O    | -0.658089 | 0.836424  | -1.201315 |
| H    | 0.090233  | 1.389388  | -0.877983 |
| C    | -1.030748 | 0.011715  | -0.141392 |
| H    | -0.195228 | -0.243258 | 0.522081  |
| C    | -2.087162 | 0.719518  | 0.697298  |
| C    | -1.543552 | -1.284561 | -0.746198 |
| F    | -1.593730 | 1.882810  | 1.140230  |
| F    | -3.188563 | 0.991261  | -0.012359 |
| F    | -2.455421 | -0.001777 | 1.763226  |
| F    | -2.515646 | -1.063935 | -1.637893 |
| F    | -2.026176 | -2.110703 | 0.190466  |
| F    | -0.551202 | -1.918477 | -1.380021 |

#### 7

M06-2X SCF energy (au): -6262.18965932  
M06-2X enthalpy (au): -6261.82139032  
M06-2X free energy (au): -6261.95494332  
MN15 SCF energy (au): -6264.27641486  
MN15 enthalpy (au): -6263.90814586  
MN15 free energy (au): -6264.04169886  
MN15 free energy (quasi-harmonic) (au): -6264.02865154

#### Cartesian coordinates

| ATOM | X         | Y         | Z         |
|------|-----------|-----------|-----------|
| N    | -1.037569 | 0.416510  | 2.720301  |
| Br   | 0.414529  | -0.559195 | 2.127622  |
| C    | -2.294656 | -0.115356 | 2.830535  |
| C    | -3.261721 | 1.004597  | 3.096372  |
| C    | -2.447434 | 2.285931  | 2.889955  |
| C    | -1.040282 | 1.818800  | 2.632922  |
| O    | -0.056263 | 2.467741  | 2.366893  |
| O    | -2.572730 | -1.306692 | 2.744765  |
| H    | -4.106312 | 0.903064  | 2.413173  |
| H    | -3.633113 | 0.890708  | 4.118448  |
| H    | -2.453299 | 2.958800  | 3.749528  |
| H    | -2.760788 | 2.847523  | 2.005891  |
| S    | -1.081688 | -3.296772 | 0.521493  |
| O    | 0.298549  | -3.604740 | 0.192127  |
| O    | -1.746743 | -2.160702 | -0.083872 |
| O    | -1.296781 | -3.315683 | 2.055479  |
| H    | -1.800697 | -2.447870 | 2.387069  |
| C    | -2.037586 | -4.787705 | 0.049978  |
| F    | -3.302465 | -4.624778 | 0.401270  |
| F    | -1.953872 | -4.942534 | -1.262159 |
| F    | -1.534852 | -5.848435 | 0.659664  |
| O    | -1.461900 | 1.016611  | 0.021149  |
| H    | -0.504940 | 1.001540  | -0.170777 |
| C    | -2.177823 | 0.638869  | -1.112104 |
| H    | -1.924803 | -0.363843 | -1.475234 |
| C    | -3.640634 | 0.626781  | -0.697568 |
| C    | -1.913832 | 1.617135  | -2.250563 |
| F    | -4.007537 | 1.790002  | -0.143738 |
| F    | -4.438517 | 0.398610  | -1.744275 |
| F    | -3.860718 | -0.329933 | 0.211158  |
| F    | -2.463068 | 1.206656  | -3.395899 |
| F    | -0.584358 | 1.704000  | -2.439344 |
| F    | -2.367460 | 2.845711  | -1.992452 |
| O    | 1.268724  | 1.703520  | 0.064813  |
| H    | 1.203478  | 1.964077  | 1.005691  |
| C    | 1.714552  | 2.775740  | -0.712169 |
| H    | 1.568821  | 2.528960  | -1.765979 |
| C    | 0.914730  | 4.041575  | -0.417081 |
| C    | 3.209256  | 2.971621  | -0.485072 |
| F    | 1.228348  | 4.556778  | 0.779833  |
| F    | 1.140321  | 4.981354  | -1.337727 |
| F    | -0.390361 | 3.762627  | -0.409909 |
| F    | 3.491349  | 3.096131  | 0.816764  |
| F    | 3.668244  | 4.052978  | -1.118251 |
| F    | 3.880064  | 1.904386  | -0.939345 |
| O    | 2.379672  | -1.831513 | 0.838468  |
| H    | 2.061087  | -2.686632 | 0.498888  |
| C    | 2.812088  | -0.996390 | -0.194813 |
| H    | 2.910977  | 0.014025  | 0.207087  |
| C    | 4.192768  | -1.436513 | -0.670219 |
| C    | 1.818625  | -0.922371 | -1.357732 |
| F    | 4.603492  | -0.705716 | -1.712399 |
| F    | 5.079507  | -1.293272 | 0.316767  |
| F    | 4.200386  | -2.723526 | -1.036003 |
| F    | 2.082047  | 0.128176  | -2.142511 |
| F    | 0.563383  | -0.802019 | -0.909249 |
| F    | 1.860184  | -2.021676 | -2.121088 |

## 7\_A

M06-2X SCF energy (au): -5472.61572401  
M06-2X enthalpy (au): -5472.32435801  
M06-2X free energy (au): -5472.43428401  
MN15 SCF energy (au): -5474.84474851  
MN15 enthalpy (au): -5474.55338251  
MN15 free energy (au): -5474.66330851  
MN15 free energy (quasi-harmonic) (au): -5474.65389350

## Cartesian coordinates

| ATOM | X         | Y         | Z         |
|------|-----------|-----------|-----------|
| N    | 1.124404  | 2.325452  | -0.109358 |
| Br   | 0.281426  | 2.616590  | 1.493928  |
| C    | 2.304516  | 1.651151  | -0.254196 |
| C    | 2.747513  | 1.769430  | -1.684563 |
| C    | 1.640098  | 2.557071  | -2.390220 |
| C    | 0.618303  | 2.859147  | -1.321544 |
| O    | -0.425142 | 3.449563  | -1.392569 |
| O    | 2.920479  | 1.073859  | 0.638591  |
| H    | 3.713065  | 2.281831  | -1.688582 |
| H    | 2.886433  | 0.762694  | -2.079036 |
| H    | 1.151298  | 1.990962  | -3.184108 |
| H    | 1.985003  | 3.509766  | -2.798922 |
| S    | 0.860345  | -0.779518 | 2.340714  |
| O    | 0.451482  | -0.517535 | 0.973803  |
| O    | -0.127946 | -0.780221 | 3.399801  |
| O    | 2.070164  | 0.104144  | 2.734298  |
| H    | 2.449489  | 0.606770  | 1.879582  |
| C    | 1.636474  | -2.440652 | 2.347523  |
| F    | 0.712865  | -3.346588 | 2.069655  |
| F    | 2.593778  | -2.476360 | 1.434838  |
| F    | 2.149368  | -2.680963 | 3.544506  |
| O    | -1.666352 | 0.997766  | -0.313996 |
| H    | -2.258528 | 1.315781  | -1.015805 |
| C    | -2.398132 | 0.427865  | 0.729117  |
| H    | -1.728521 | 0.273866  | 1.578783  |
| C    | -3.501081 | 1.378368  | 1.175368  |
| C    | -2.928269 | -0.942725 | 0.318293  |
| F    | -4.279652 | 0.827152  | 2.108210  |
| F    | -2.967100 | 2.493996  | 1.679281  |
| F    | -4.277817 | 1.732691  | 0.141578  |
| F    | -1.927220 | -1.678617 | -0.182099 |
| F    | -3.871410 | -0.848680 | -0.628485 |
| F    | -3.447736 | -1.601228 | 1.355032  |
| O    | 0.385938  | -0.035336 | -1.768593 |
| H    | -0.348591 | 0.025980  | -1.128154 |
| C    | 0.408999  | -1.278502 | -2.391461 |
| H    | -0.575502 | -1.753002 | -2.466707 |
| C    | 0.914741  | -1.050758 | -3.811615 |
| C    | 1.335464  | -2.228706 | -1.624725 |
| F    | 2.206882  | -0.683575 | -3.817276 |
| F    | 0.799463  | -2.145481 | -4.565644 |
| F    | 0.216685  | -0.073798 | -4.398189 |
| F    | 0.701378  | -2.762392 | -0.575586 |
| F    | 2.416080  | -1.586794 | -1.168632 |
| F    | 1.756067  | -3.241572 | -2.395369 |

## 7\_B

M06-2X SCF energy (au): -4683.04649998

M06-2X enthalpy (au): -4682.83101998  
M06-2X free energy (au): -4682.92003898  
MN15 SCF energy (au): -4685.41791317  
MN15 enthalpy (au): -4685.20243317  
MN15 free energy (au): -4685.29145217  
MN15 free energy (quasi-harmonic) (au): -4685.28259019

Cartesian coordinates

| ATOM | X         | Y         | Z         |
|------|-----------|-----------|-----------|
| N    | -0.272839 | 2.481750  | 0.523409  |
| Br   | -0.125472 | 2.720491  | 2.334659  |
| C    | -1.110526 | 1.622487  | -0.064898 |
| C    | -1.067854 | 1.810752  | -1.549426 |
| C    | 0.178530  | 2.673292  | -1.777540 |
| C    | 0.571872  | 3.173285  | -0.412379 |
| O    | 1.404656  | 3.953226  | -0.059631 |
| O    | -1.838403 | 0.855066  | 0.612585  |
| H    | -1.067029 | 0.855985  | -2.074968 |
| H    | -1.990808 | 2.341998  | -1.809725 |
| H    | 0.014003  | 3.523298  | -2.440478 |
| H    | 1.016382  | 2.079512  | -2.153770 |
| S    | -1.748858 | -2.016899 | -0.957743 |
| O    | -1.036298 | -2.306647 | 0.282398  |
| O    | -0.924169 | -1.916944 | -2.169576 |
| O    | -2.733821 | -0.887776 | -0.831418 |
| H    | -2.336489 | 0.112949  | 0.007110  |
| C    | -2.856685 | -3.441025 | -1.263375 |
| F    | -3.658755 | -3.611937 | -0.222095 |
| F    | -3.583508 | -3.220781 | -2.349872 |
| F    | -2.122073 | -4.531306 | -1.437468 |
| O    | 0.949029  | -0.194989 | -1.021894 |
| H    | 0.545791  | -0.827942 | -1.646182 |
| C    | 1.866268  | -0.870579 | -0.214017 |
| H    | 1.587030  | -1.912518 | -0.018514 |
| C    | 3.229516  | -0.856894 | -0.896192 |
| C    | 1.880282  | -0.137026 | 1.117357  |
| F    | 3.152081  | -1.511994 | -2.059845 |
| F    | 3.633934  | 0.390145  | -1.162328 |
| F    | 4.168380  | -1.445988 | -0.149717 |
| F    | 2.751456  | -0.670585 | 1.973912  |
| F    | 0.664113  | -0.184628 | 1.670464  |
| F    | 2.199802  | 1.158362  | 0.958487  |

8

M06-2X SCF energy (au): -9088.79319471  
M06-2X enthalpy (au): -9088.28039871  
M06-2X free energy (au): -9088.43569871  
MN15 SCF energy (au): -9093.50157941  
MN15 enthalpy (au): -9092.98878341  
MN15 free energy (au): -9093.14408341  
MN15 free energy (quasi-harmonic) (au): -9093.12615870

Cartesian coordinates

| ATOM | X         | Y         | Z         |
|------|-----------|-----------|-----------|
| C    | -0.670597 | -2.179138 | -2.915907 |
| C    | 0.176280  | -0.974685 | -2.865235 |
| H    | -0.325665 | -2.957175 | -3.598558 |
| H    | -0.065523 | -0.259140 | -2.080143 |
| C    | 1.664928  | -1.182760 | -3.084673 |

|    |           |           |           |
|----|-----------|-----------|-----------|
| H  | 2.078235  | -1.384556 | -2.087092 |
| H  | 1.824636  | -2.082725 | -3.687330 |
| C  | 2.393218  | -0.003437 | -3.735319 |
| H  | 3.465578  | -0.214254 | -3.710328 |
| H  | 2.104043  | 0.066015  | -4.787685 |
| C  | 2.125262  | 1.353416  | -3.072081 |
| H  | 1.071184  | 1.636132  | -3.132921 |
| H  | 2.716247  | 2.123332  | -3.577897 |
| C  | 2.512637  | 1.347274  | -1.620293 |
| O  | 3.801945  | 1.072095  | -1.437076 |
| O  | 1.736708  | 1.539725  | -0.700873 |
| C  | -1.867847 | -2.410310 | -2.230020 |
| C  | -2.362009 | -1.525464 | -1.236845 |
| C  | -2.584203 | -3.596093 | -2.538204 |
| C  | -3.539616 | -1.812448 | -0.585076 |
| H  | -1.795725 | -0.648569 | -0.950399 |
| C  | -3.765450 | -3.884689 | -1.889845 |
| H  | -2.194129 | -4.272876 | -3.292425 |
| C  | -4.226684 | -2.986697 | -0.921191 |
| H  | -3.920253 | -1.150170 | 0.183880  |
| H  | -4.321869 | -4.786119 | -2.117694 |
| Br | -5.823488 | -3.377346 | -0.019767 |
| Br | -0.716065 | -0.264361 | -4.512957 |
| H  | 4.003994  | 1.058480  | -0.477484 |
| S  | 2.786248  | 0.175116  | 1.726525  |
| O  | 3.873358  | 1.130107  | 1.416461  |
| O  | 2.705720  | -0.931123 | 0.753489  |
| O  | 1.495614  | 0.769691  | 2.106707  |
| C  | 3.364129  | -0.629160 | 3.264448  |
| F  | 3.469432  | 0.271229  | 4.232842  |
| F  | 2.491558  | -1.564061 | 3.629127  |
| F  | 4.546794  | -1.195454 | 3.060651  |
| O  | 0.371415  | -1.868464 | -0.165328 |
| H  | 1.108946  | -1.254037 | 0.025693  |
| C  | 0.605943  | -3.012908 | 0.594247  |
| H  | 1.254638  | -2.821983 | 1.456272  |
| C  | -0.722268 | -3.524421 | 1.138643  |
| C  | 1.298103  | -4.046642 | -0.284659 |
| F  | -1.410797 | -2.519933 | 1.682189  |
| F  | -1.487050 | -4.073788 | 0.181689  |
| F  | -0.529759 | -4.457735 | 2.076330  |
| F  | 2.536705  | -3.636758 | -0.578237 |
| F  | 0.651206  | -4.216141 | -1.449076 |
| F  | 1.381313  | -5.239177 | 0.313067  |
| O  | -0.779687 | 0.788156  | 0.405257  |
| H  | 0.078258  | 0.753582  | 0.873584  |
| C  | -1.103479 | 2.119279  | 0.146696  |
| H  | -0.245821 | 2.716870  | -0.182441 |
| C  | -2.104729 | 2.107827  | -0.997178 |
| C  | -1.683334 | 2.748537  | 1.409147  |
| F  | -1.550950 | 1.540830  | -2.082587 |
| F  | -3.197450 | 1.394462  | -0.693847 |
| F  | -2.493426 | 3.336866  | -1.334166 |
| F  | -0.734297 | 2.801374  | 2.353648  |
| F  | -2.696324 | 2.022983  | 1.894860  |
| F  | -2.132431 | 3.989562  | 1.200603  |
| O  | 3.446352  | 3.749426  | 0.719782  |
| H  | 3.788986  | 2.860832  | 0.929286  |
| C  | 2.202770  | 3.859789  | 1.346127  |

|   |          |          |           |
|---|----------|----------|-----------|
| H | 1.602511 | 2.944683 | 1.278186  |
| C | 2.403777 | 4.166760 | 2.825043  |
| C | 1.458677 | 4.964372 | 0.618563  |
| F | 1.245357 | 4.268422 | 3.484295  |
| F | 3.114346 | 3.181081 | 3.389614  |
| F | 3.080734 | 5.306898 | 3.009590  |
| F | 0.272922 | 5.216360 | 1.184790  |
| F | 1.237377 | 4.602281 | -0.653075 |
| F | 2.154651 | 6.104822 | 0.594949  |

#### 8\_A

M06-2X SCF energy (au): -8299.22421974  
M06-2X enthalpy (au): -8298.78824074  
M06-2X free energy (au): -8298.92173674  
MN15 SCF energy (au): -8304.07022434  
MN15 enthalpy (au): -8303.63424534  
MN15 free energy (au): -8303.76774134  
MN15 free energy (quasi-harmonic) (au): -8303.75180860

#### Cartesian coordinates

| ATOM | X         | Y         | Z         |
|------|-----------|-----------|-----------|
| C    | -3.724320 | 0.655212  | -1.385977 |
| C    | -3.459393 | 2.094492  | -1.184346 |
| H    | -4.088371 | 0.382049  | -2.378370 |
| H    | -2.927335 | 2.332578  | -0.266041 |
| C    | -2.933646 | 2.869163  | -2.386819 |
| H    | -3.464006 | 2.541525  | -3.288604 |
| H    | -3.184778 | 3.920650  | -2.223240 |
| C    | -1.414819 | 2.766442  | -2.583932 |
| H    | -1.148816 | 3.507435  | -3.342748 |
| H    | -0.905680 | 3.057436  | -1.661243 |
| C    | -0.901819 | 1.406098  | -3.046207 |
| H    | 0.107482  | 1.502014  | -3.465523 |
| H    | -1.525347 | 0.980646  | -3.840065 |
| C    | -0.777142 | 0.392294  | -1.940049 |
| O    | -0.700829 | -0.854736 | -2.392856 |
| O    | -0.760741 | 0.668113  | -0.753032 |
| C    | -3.551444 | -0.361982 | -0.460089 |
| C    | -3.775717 | -1.699267 | -0.906190 |
| C    | -3.044031 | -0.133961 | 0.856326  |
| C    | -3.460989 | -2.765036 | -0.098467 |
| H    | -4.166967 | -1.862825 | -1.906261 |
| C    | -2.756187 | -1.196769 | 1.671432  |
| H    | -2.848218 | 0.871181  | 1.215424  |
| C    | -2.932098 | -2.499584 | 1.171904  |
| H    | -3.587235 | -3.785499 | -0.439654 |
| H    | -2.351359 | -1.044872 | 2.664567  |
| Br   | -2.381703 | -3.928040 | 2.228534  |
| Br   | -5.362160 | 2.598184  | -0.856873 |
| H    | -0.598387 | -1.478777 | -1.631564 |
| S    | 0.655301  | -2.066240 | 0.680065  |
| O    | -0.378950 | -2.517865 | -0.270550 |
| O    | 0.152135  | -1.675272 | 2.005427  |
| O    | 1.646510  | -1.141957 | 0.101376  |
| C    | 1.613679  | -3.584583 | 1.028428  |
| F    | 2.598153  | -3.306748 | 1.875895  |
| F    | 0.827170  | -4.511377 | 1.564026  |
| F    | 2.133658  | -4.056438 | -0.099834 |
| O    | -0.257829 | 0.961277  | 2.554120  |



|   |           |           |           |
|---|-----------|-----------|-----------|
| H | -0.169580 | -0.002761 | 2.402869  |
| C | 0.674202  | 1.607506  | 1.740589  |
| H | 0.727180  | 1.190003  | 0.729857  |
| C | 0.210771  | 3.051678  | 1.632405  |
| C | 2.071506  | 1.516935  | 2.342748  |
| F | 1.134498  | 3.829169  | 1.057434  |
| F | -0.908860 | 3.130490  | 0.898097  |
| F | -0.068649 | 3.569350  | 2.833053  |
| F | 2.355177  | 0.248220  | 2.650451  |
| F | 2.198444  | 2.242440  | 3.460915  |
| F | 3.000891  | 1.948113  | 1.473310  |
| O | 2.138305  | 0.032741  | -2.307355 |
| H | 1.843260  | -0.637715 | -1.663476 |
| C | 3.088352  | 0.827076  | -1.662537 |
| H | 3.205736  | 0.578156  | -0.602216 |
| C | 4.433255  | 0.610159  | -2.343172 |
| C | 2.629441  | 2.276205  | -1.745292 |
| F | 4.364875  | 0.847253  | -3.657872 |
| F | 5.383904  | 1.401338  | -1.832131 |
| F | 4.820155  | -0.659219 | -2.182374 |
| F | 1.414323  | 2.396099  | -1.192174 |
| F | 2.527303  | 2.694354  | -3.013446 |
| F | 3.457031  | 3.103361  | -1.102091 |

#### 8\_B

M06-2X SCF energy (au): -7509.64738236  
M06-2X enthalpy (au): -7509.28738636  
M06-2X free energy (au): -7509.39704036  
MN15 SCF energy (au): -7514.63575681  
MN15 enthalpy (au): -7514.27576081  
MN15 free energy (au): -7514.38541481  
MN15 free energy (quasi-harmonic) (au): -7514.37371545

#### Cartesian coordinates

| ATOM | X         | Y         | Z         |
|------|-----------|-----------|-----------|
| C    | 0.617251  | 1.787194  | 1.706629  |
| C    | -0.060259 | 3.045226  | 1.331606  |
| H    | 0.425665  | 1.412168  | 2.707567  |
| H    | 0.174658  | 3.382875  | 0.324669  |
| C    | -1.541774 | 3.172227  | 1.631618  |
| H    | -1.804753 | 4.221531  | 1.474595  |
| H    | -2.040392 | 2.606825  | 0.836599  |
| C    | -2.001837 | 2.687888  | 3.018716  |
| H    | -1.165551 | 2.311528  | 3.616510  |
| H    | -2.411501 | 3.528845  | 3.582641  |
| C    | -3.074905 | 1.610611  | 2.918714  |
| H    | -3.958884 | 1.983537  | 2.388310  |
| H    | -3.417933 | 1.286056  | 3.907181  |
| C    | -2.618128 | 0.387541  | 2.170886  |
| O    | -3.604120 | -0.493146 | 2.007583  |
| O    | -1.493129 | 0.199100  | 1.737392  |
| C    | 1.554685  | 1.095511  | 0.941903  |
| C    | 2.223906  | 0.008393  | 1.568144  |
| C    | 1.845825  | 1.412163  | -0.415730 |
| C    | 3.165752  | -0.725501 | 0.882331  |
| H    | 1.991677  | -0.231480 | 2.600746  |
| C    | 2.772735  | 0.668779  | -1.107380 |
| H    | 1.327580  | 2.218810  | -0.923409 |
| C    | 3.421763  | -0.388164 | -0.449742 |

|    |           |           |           |
|----|-----------|-----------|-----------|
| H  | 3.682970  | -1.552058 | 1.354241  |
| H  | 2.996661  | 0.888613  | -2.144467 |
| Br | 4.680377  | -1.397005 | -1.402930 |
| Br | 1.002181  | 4.232671  | 2.533532  |
| H  | -3.314917 | -1.184188 | 1.382603  |
| S  | -2.767681 | 0.508689  | -1.122021 |
| O  | -3.019479 | -0.896407 | -0.765348 |
| O  | -1.333753 | 0.883444  | -1.160566 |
| O  | -3.629556 | 1.486745  | -0.447685 |
| C  | -3.269174 | 0.603220  | -2.879055 |
| F  | -3.082369 | 1.837295  | -3.340595 |
| F  | -2.547781 | -0.241689 | -3.609054 |
| F  | -4.555620 | 0.289251  | -3.002324 |
| O  | 0.318547  | -1.223564 | -0.577544 |
| H  | -0.273162 | -0.468970 | -0.786674 |
| C  | -0.452214 | -2.301670 | -0.158545 |
| H  | -1.385009 | -2.004286 | 0.328315  |
| C  | -0.816117 | -3.177432 | -1.355327 |
| C  | 0.370785  | -3.068624 | 0.861411  |
| F  | 0.234333  | -3.889583 | -1.794308 |
| F  | -1.790153 | -4.043968 | -1.050999 |
| F  | -1.235791 | -2.421742 | -2.372933 |
| F  | 0.465934  | -2.366359 | 1.998727  |
| F  | 1.616161  | -3.304261 | 0.432632  |
| F  | -0.192503 | -4.248499 | 1.154037  |

9

|                                         |                |
|-----------------------------------------|----------------|
| M06-2X SCF energy (au):                 | -3330.48921480 |
| M06-2X enthalpy (au):                   | -3330.21364880 |
| M06-2X free energy (au):                | -3330.32778180 |
| MN15 SCF energy (au):                   | -3329.96642352 |
| MN15 enthalpy (au):                     | -3329.69085752 |
| MN15 free energy (au):                  | -3329.80499052 |
| MN15 free energy (quasi-harmonic) (au): | -3329.79378072 |

#### Cartesian coordinates

| ATOM | X         | Y         | Z         |
|------|-----------|-----------|-----------|
| S    | -1.724872 | -0.336089 | 1.791845  |
| O    | -2.972783 | -0.299023 | 1.049063  |
| O    | -0.643083 | 0.557451  | 1.424805  |
| O    | -1.213171 | -1.794085 | 1.930406  |
| H    | -0.201382 | -1.873024 | 1.652971  |
| C    | -2.188703 | 0.034749  | 3.527004  |
| F    | -2.628307 | 1.282130  | 3.573011  |
| F    | -3.146354 | -0.795077 | 3.905952  |
| F    | -1.138361 | -0.101559 | 4.315852  |
| O    | 1.110319  | -1.827374 | 1.034281  |
| H    | 1.028334  | -1.189960 | 0.268919  |
| C    | 2.306032  | -1.658556 | 1.748231  |
| H    | 2.364699  | -2.429051 | 2.521450  |
| C    | 3.485167  | -1.849598 | 0.798308  |
| C    | 2.324582  | -0.295726 | 2.433845  |
| F    | 3.385958  | -3.028039 | 0.183370  |
| F    | 3.509152  | -0.895472 | -0.141710 |
| F    | 4.646684  | -1.813100 | 1.453273  |
| F    | 1.324681  | -0.224884 | 3.318309  |
| F    | 2.166810  | 0.695959  | 1.551898  |
| F    | 3.470916  | -0.094847 | 3.087536  |
| O    | 0.540796  | -0.283886 | -1.007676 |

|   |           |           |           |
|---|-----------|-----------|-----------|
| H | -0.141247 | 0.377042  | -0.771111 |
| C | 0.153108  | -0.929885 | -2.189108 |
| H | -0.398342 | -0.263264 | -2.858764 |
| C | 1.427487  | -1.357404 | -2.901748 |
| C | -0.754639 | -2.115511 | -1.867484 |
| F | 1.141635  | -2.011985 | -4.031257 |
| F | 2.158524  | -0.285185 | -3.208362 |
| F | 2.177925  | -2.159527 | -2.139238 |
| F | -0.112620 | -3.078866 | -1.197918 |
| F | -1.263364 | -2.651788 | -2.977768 |
| F | -1.771460 | -1.707110 | -1.095325 |
| O | -1.891402 | 1.014043  | -1.234855 |
| H | -2.624810 | 0.661069  | -0.701248 |
| C | -2.062832 | 2.382203  | -1.464697 |
| H | -3.093170 | 2.646421  | -1.725613 |
| C | -1.674655 | 3.175112  | -0.219465 |
| C | -1.174358 | 2.709562  | -2.657146 |
| F | -2.387428 | 2.738420  | 0.826628  |
| F | -0.379021 | 3.035094  | 0.076674  |
| F | -1.924634 | 4.478574  | -0.372754 |
| F | -1.125484 | 4.022012  | -2.888164 |
| F | -1.640679 | 2.105338  | -3.753458 |
| F | 0.078685  | 2.273205  | -2.463768 |

#### 9\_A

M06-2X SCF energy (au): -2540.92033776  
M06-2X enthalpy (au): -2540.72094376  
M06-2X free energy (au): -2540.81107576  
MN15 SCF energy (au): -2540.53460000  
MN15 enthalpy (au): -2540.33520600  
MN15 free energy (au): -2540.42533800  
MN15 free energy (quasi-harmonic) (au): -2540.41866124

#### Cartesian coordinates

| ATOM | X         | Y         | Z         |
|------|-----------|-----------|-----------|
| S    | -2.389115 | 0.867386  | -0.570186 |
| O    | -3.571703 | 0.054070  | -0.390997 |
| O    | -1.309798 | 0.417095  | -1.432655 |
| O    | -1.830716 | 1.340337  | 0.799871  |
| H    | -0.815091 | 1.098772  | 0.894274  |
| C    | -2.981288 | 2.469715  | -1.238562 |
| F    | -1.976921 | 3.324957  | -1.324089 |
| F    | -3.488779 | 2.254891  | -2.442727 |
| F    | -3.916334 | 2.956186  | -0.438677 |
| O    | 0.539959  | 0.591920  | 0.889126  |
| H    | 0.622073  | -0.154837 | 0.233443  |
| C    | 1.632073  | 1.468951  | 0.787967  |
| H    | 1.484047  | 2.300280  | 1.481355  |
| C    | 2.894229  | 0.717540  | 1.202005  |
| C    | 1.709194  | 2.032251  | -0.627866 |
| F    | 3.093787  | -0.348357 | 0.415203  |
| F    | 3.974811  | 1.495647  | 1.130685  |
| F    | 2.770817  | 0.281611  | 2.455443  |
| F    | 2.757502  | 2.840100  | -0.783296 |
| F    | 0.599624  | 2.726129  | -0.897124 |
| F    | 1.801216  | 1.046928  | -1.530739 |
| O    | 0.757699  | -1.472373 | -0.791925 |
| H    | 0.319520  | -1.309177 | -1.643676 |
| C    | 0.334109  | -2.692915 | -0.243477 |

|   |           |           |           |
|---|-----------|-----------|-----------|
| H | 0.385491  | -3.517548 | -0.961899 |
| C | 1.305601  | -2.987029 | 0.892420  |
| C | -1.110528 | -2.564090 | 0.235104  |
| F | 2.546003  | -3.084877 | 0.415322  |
| F | 1.291677  | -2.002479 | 1.801257  |
| F | 1.001586  | -4.128007 | 1.511182  |
| F | -1.515974 | -3.640647 | 0.905754  |
| F | -1.919058 | -2.392742 | -0.813481 |
| F | -1.257323 | -1.493379 | 1.035175  |

#### 9\_B

M06-2X SCF energy (au): -1751.34795854  
M06-2X enthalpy (au): -1751.22390354  
M06-2X free energy (au): -1751.29193254  
MN15 SCF energy (au): -1751.10295384  
MN15 enthalpy (au): -1750.97889884  
MN15 free energy (au): -1751.04692784  
MN15 free energy (quasi-harmonic) (au): -1751.04193530

#### Cartesian coordinates

| ATOM | X         | Y         | Z         |
|------|-----------|-----------|-----------|
| S    | -2.244935 | -0.406374 | 0.959837  |
| O    | -1.561117 | 0.281616  | 2.038027  |
| O    | -3.451146 | -1.164493 | 1.201012  |
| O    | -1.234501 | -1.269468 | 0.141854  |
| H    | -0.277909 | -1.144210 | 0.487653  |
| C    | -2.684832 | 0.864028  | -0.288714 |
| F    | -1.615562 | 1.581829  | -0.586950 |
| F    | -3.146894 | 0.269938  | -1.375839 |
| F    | -3.619502 | 1.646269  | 0.227716  |
| O    | 1.089626  | -0.862897 | 1.103058  |
| H    | 1.057269  | -0.576315 | 2.030226  |
| C    | 2.137534  | -0.227661 | 0.412336  |
| H    | 2.932796  | 0.086284  | 1.093131  |
| C    | 2.707085  | -1.260759 | -0.551750 |
| C    | 1.619992  | 1.014065  | -0.314561 |
| F    | 3.320591  | -2.231878 | 0.125331  |
| F    | 1.740575  | -1.823173 | -1.283450 |
| F    | 3.589049  | -0.700295 | -1.382785 |
| F    | 0.837952  | 0.697007  | -1.353793 |
| F    | 2.631945  | 1.753017  | -0.772361 |
| F    | 0.898876  | 1.758591  | 0.526794  |

#### HFIP\_dimer

M06-2X SCF energy (au): -1579.10982103  
M06-2X enthalpy (au): -1578.95960203  
M06-2X free energy (au): -1579.03002303  
MN15 SCF energy (au): -1578.84380226  
MN15 enthalpy (au): -1578.69358326  
MN15 free energy (au): -1578.76400426  
MN15 free energy (quasi-harmonic) (au): -1578.75968723

#### Cartesian coordinates

| ATOM | X         | Y         | Z        |
|------|-----------|-----------|----------|
| O    | -0.681293 | -1.178311 | 0.528966 |
| H    | -0.400430 | -1.987101 | 0.076234 |
| C    | -2.004644 | -0.858129 | 0.199374 |
| H    | -2.631009 | -1.741662 | 0.041519 |
| C    | -2.555111 | -0.096979 | 1.397763 |

|   |           |           |           |
|---|-----------|-----------|-----------|
| C | -2.024436 | -0.025558 | -1.079878 |
| F | -2.564547 | -0.887166 | 2.472819  |
| F | -1.794445 | 0.967857  | 1.682407  |
| F | -3.800721 | 0.328784  | 1.180056  |
| F | -3.265043 | 0.345521  | -1.408605 |
| F | -1.525960 | -0.742342 | -2.091906 |
| F | -1.280103 | 1.078912  | -0.955666 |
| O | 0.988429  | 1.022364  | 0.970739  |
| H | 0.426621  | 0.228647  | 0.866711  |
| C | 2.176071  | 0.833296  | 0.265832  |
| H | 2.834398  | 1.689346  | 0.440608  |
| C | 2.892777  | -0.412231 | 0.774395  |
| C | 1.900063  | 0.769528  | -1.233485 |
| F | 4.048032  | -0.628017 | 0.139829  |
| F | 3.151108  | -0.289833 | 2.078084  |
| F | 2.128450  | -1.506312 | 0.617596  |
| F | 1.096537  | -0.260205 | -1.540503 |
| F | 3.024489  | 0.632877  | -1.944655 |
| F | 1.292037  | 1.888494  | -1.632286 |

#### HFIP\_monomer

|                                         |                |
|-----------------------------------------|----------------|
| M06-2X SCF energy (au):                 | -789.546847710 |
| M06-2X enthalpy (au):                   | -789.472854710 |
| M06-2X free energy (au):                | -789.518084710 |
| MN15 SCF energy (au):                   | -789.417726497 |
| MN15 enthalpy (au):                     | -789.343733497 |
| MN15 free energy (au):                  | -789.388963497 |
| MN15 free energy (quasi-harmonic) (au): | -789.388080787 |

#### Cartesian coordinates

| ATOM | X         | Y        | Z         |
|------|-----------|----------|-----------|
| O    | -0.010865 | 2.174661 | -0.152203 |
| H    | 0.789292  | 2.073874 | 0.380621  |
| C    | -0.458014 | 3.498343 | -0.068189 |
| H    | -0.109438 | 4.026171 | 0.825618  |
| C    | 0.039497  | 4.264367 | -1.288691 |
| C    | -1.977352 | 3.436128 | -0.006142 |
| F    | 1.376062  | 4.228060 | -1.326093 |
| F    | -0.412246 | 3.726573 | -2.426684 |
| F    | -0.337665 | 5.547009 | -1.261566 |
| F    | -2.482188 | 2.744689 | -1.032872 |
| F    | -2.521782 | 4.657450 | -0.023020 |
| F    | -2.360773 | 2.826578 | 1.119227  |

#### HFIP\_trimer

|                                         |                |
|-----------------------------------------|----------------|
| M06-2X SCF energy (au):                 | -2368.67537517 |
| M06-2X enthalpy (au):                   | -2368.44921517 |
| M06-2X free energy (au):                | -2368.54335217 |
| MN15 SCF energy (au):                   | -2368.27081733 |
| MN15 enthalpy (au):                     | -2368.04465733 |
| MN15 free energy (au):                  | -2368.13879433 |
| MN15 free energy (quasi-harmonic) (au): | -2368.13141016 |

#### Cartesian coordinates

| ATOM | X        | Y         | Z         |
|------|----------|-----------|-----------|
| O    | 1.436347 | -1.285593 | 0.613362  |
| H    | 0.617399 | -0.756696 | 0.748141  |
| C    | 1.121025 | -2.545329 | 0.097604  |
| H    | 2.048946 | -3.102238 | -0.059726 |

|   |           |           |           |
|---|-----------|-----------|-----------|
| C | 0.279456  | -3.332079 | 1.097966  |
| C | 0.433375  | -2.401029 | -1.255494 |
| F | 0.912218  | -3.390110 | 2.272050  |
| F | -0.910836 | -2.755275 | 1.305855  |
| F | 0.062731  | -4.581810 | 0.678017  |
| F | 1.240256  | -1.763549 | -2.108107 |
| F | -0.697033 | -1.683133 | -1.151487 |
| F | 0.117576  | -3.584725 | -1.784783 |
| O | -0.856746 | 0.085997  | 1.109905  |
| H | -1.023939 | 0.215140  | 2.057432  |
| C | -1.837429 | 0.699736  | 0.329040  |
| H | -1.595436 | 0.533426  | -0.722172 |
| C | -3.196373 | 0.058699  | 0.587339  |
| C | -1.825394 | 2.204633  | 0.572443  |
| F | -4.132026 | 0.548796  | -0.229301 |
| F | -3.114675 | -1.257897 | 0.388978  |
| F | -3.603600 | 0.258490  | 1.848273  |
| F | -2.032987 | 2.486696  | 1.866152  |
| F | -2.764727 | 2.828269  | -0.141790 |
| F | -0.636904 | 2.711063  | 0.234515  |
| O | 3.343981  | 0.209950  | -0.753793 |
| H | 2.710295  | -0.352942 | -0.260620 |
| C | 2.813088  | 1.489378  | -0.910422 |
| H | 3.547925  | 2.118591  | -1.421685 |
| C | 1.567206  | 1.447508  | -1.788149 |
| C | 2.538228  | 2.126208  | 0.448230  |
| F | 0.594324  | 0.712618  | -1.215319 |
| F | 1.068546  | 2.664049  | -2.018968 |
| F | 1.851676  | 0.882766  | -2.961928 |
| F | 2.045830  | 3.362700  | 0.332828  |
| F | 3.669337  | 2.192965  | 1.154766  |
| F | 1.661522  | 1.401278  | 1.161238  |

NBS

M06-2X SCF energy (au): -2931.67105805  
M06-2X enthalpy (au): -2931.58070605  
M06-2X free energy (au): -2931.62268205  
MN15 SCF energy (au): -2934.29681925  
MN15 enthalpy (au): -2934.20646725  
MN15 free energy (au): -2934.24844325  
MN15 free energy (quasi-harmonic) (au): -2934.24810020

Cartesian coordinates

| ATOM | X         | Y         | Z         |
|------|-----------|-----------|-----------|
| N    | -1.829987 | 0.060265  | 0.059673  |
| Br   | -3.606645 | 0.518426  | 0.100762  |
| C    | -1.378439 | -1.219982 | 0.388214  |
| C    | 0.124808  | -1.205175 | 0.231810  |
| C    | 0.482215  | 0.212815  | -0.229034 |
| C    | -0.828394 | 0.962421  | -0.307414 |
| O    | -1.029928 | 2.110081  | -0.619255 |
| O    | -2.098092 | -2.126940 | 0.726787  |
| H    | 0.568000  | -1.470335 | 1.194252  |
| H    | 0.398107  | -1.976513 | -0.491430 |
| H    | 0.946197  | 0.239876  | -1.217504 |
| H    | 1.136108  | 0.741769  | 0.467626  |

NBS-H

M06-2X SCF energy (au): -360.513272527

M06-2X enthalpy (au): -360.413913527  
M06-2X free energy (au): -360.450684527  
MN15 SCF energy (au): -360.371615037  
MN15 enthalpy (au): -360.272256037  
MN15 free energy (au): -360.309027037  
MN15 free energy (quasi-harmonic) (au): -360.308933510

Cartesian coordinates

| ATOM | X         | Y         | Z         |
|------|-----------|-----------|-----------|
| N    | -1.902882 | 0.074123  | 0.057057  |
| C    | -1.368128 | -1.067922 | 0.340474  |
| C    | 0.120924  | -1.198197 | 0.226886  |
| C    | 0.499840  | 0.208664  | -0.227555 |
| C    | -0.843525 | 0.925929  | -0.302460 |
| O    | -1.001864 | 2.085396  | -0.627117 |
| O    | -2.050617 | -2.124786 | 0.725186  |
| H    | 0.538179  | -1.484288 | 1.195907  |
| H    | 0.366991  | -1.984016 | -0.491974 |
| H    | 0.975112  | 0.237865  | -1.210558 |
| H    | 1.146780  | 0.736296  | 0.476880  |
| H    | -3.000632 | -1.916522 | 0.768894  |

TS-1

M06-2X SCF energy (au): -6118.76746712  
M06-2X enthalpy (au): -6118.43533312  
M06-2X free energy (au): -6118.51297012  
MN15 SCF energy (au): -6123.85011570  
MN15 enthalpy (au): -6123.51798170  
MN15 free energy (au): -6123.59561870  
MN15 free energy (quasi-harmonic) (au): -6123.59002758

Cartesian coordinates

| ATOM | X         | Y         | Z         |
|------|-----------|-----------|-----------|
| C    | 0.265913  | 2.157437  | 0.438482  |
| C    | -0.914410 | 1.686662  | 1.187633  |
| H    | -0.633530 | 1.520233  | 2.231666  |
| H    | 0.135876  | 3.038871  | -0.182529 |
| C    | -2.144794 | 2.587555  | 1.093500  |
| H    | -2.972936 | 2.050073  | 1.565523  |
| H    | -1.940717 | 3.463435  | 1.721165  |
| C    | -2.570705 | 3.085929  | -0.294982 |
| H    | -3.458683 | 3.703951  | -0.133086 |
| H    | -1.809566 | 3.753466  | -0.711818 |
| C    | -2.906148 | 2.024585  | -1.343083 |
| H    | -3.501707 | 2.486394  | -2.141387 |
| H    | -3.515354 | 1.214156  | -0.934921 |
| C    | -1.689462 | 1.440143  | -2.048746 |
| O    | -0.613898 | 2.028659  | -2.070568 |
| O    | -1.862587 | 0.320286  | -2.700568 |
| C    | 1.555444  | 1.620459  | 0.491717  |
| C    | 2.554983  | 2.245795  | -0.300716 |
| C    | 1.903779  | 0.510731  | 1.312695  |
| C    | 3.857979  | 1.795148  | -0.272181 |
| H    | 2.279484  | 3.082267  | -0.936050 |
| C    | 3.203278  | 0.066264  | 1.351846  |
| H    | 1.149107  | 0.007577  | 1.907309  |
| C    | 4.164632  | 0.712928  | 0.557173  |
| H    | 4.625561  | 2.264070  | -0.875814 |
| H    | 3.485581  | -0.772511 | 1.976630  |

|    |           |           |           |
|----|-----------|-----------|-----------|
| Br | 5.931140  | 0.091979  | 0.613118  |
| Br | -1.346137 | -0.143439 | 0.520892  |
| N  | -2.547001 | -2.343154 | -0.689700 |
| C  | -3.713759 | -1.930239 | -1.189094 |
| C  | -4.909362 | -2.758369 | -0.727945 |
| C  | -4.266434 | -3.789142 | 0.188963  |
| C  | -2.778261 | -3.407127 | 0.156446  |
| O  | -1.922961 | -3.986660 | 0.806398  |
| O  | -3.879577 | -0.957814 | -1.967503 |
| H  | -5.625516 | -2.101847 | -0.226203 |
| H  | -5.409778 | -3.185500 | -1.600900 |
| H  | -4.377168 | -4.818885 | -0.160368 |
| H  | -4.623959 | -3.749613 | 1.220909  |
| H  | -2.708647 | -0.211047 | -2.391725 |

TS-2

M06-2X SCF energy (au): -6118.76678438  
M06-2X enthalpy (au): -6118.43575238  
M06-2X free energy (au): -6118.51358538  
MN15 SCF energy (au): -6123.84454870  
MN15 enthalpy (au): -6123.51351670  
MN15 free energy (au): -6123.59134970  
MN15 free energy (quasi-harmonic) (au): -6123.58588232

Cartesian coordinates

| ATOM | X         | Y         | Z         |
|------|-----------|-----------|-----------|
| C    | -0.047514 | -1.532611 | 1.159461  |
| C    | -0.568039 | -2.694811 | 0.515854  |
| H    | -0.208197 | -1.562344 | 2.238601  |
| H    | 0.055012  | -3.207330 | -0.212576 |
| C    | -1.635456 | -3.502454 | 1.163772  |
| H    | -1.090950 | -4.249472 | 1.759465  |
| H    | -2.204845 | -2.878821 | 1.862510  |
| C    | -2.567693 | -4.211546 | 0.177857  |
| H    | -1.972013 | -4.719968 | -0.587220 |
| H    | -3.143131 | -4.973308 | 0.707742  |
| C    | -3.522384 | -3.218782 | -0.469935 |
| H    | -4.217451 | -2.795633 | 0.263306  |
| H    | -4.134342 | -3.689635 | -1.247209 |
| C    | -2.786897 | -2.074641 | -1.109427 |
| O    | -1.548488 | -2.057382 | -1.183915 |
| O    | -3.541003 | -1.128153 | -1.568941 |
| C    | 1.275848  | -1.023292 | 0.719248  |
| C    | 1.533688  | -0.838476 | -0.644425 |
| C    | 2.269283  | -0.703087 | 1.647188  |
| C    | 2.769267  | -0.372274 | -1.077114 |
| H    | 0.749697  | -1.048407 | -1.367694 |
| C    | 3.508301  | -0.226053 | 1.228550  |
| H    | 2.077248  | -0.830850 | 2.708872  |
| C    | 3.744962  | -0.071398 | -0.131852 |
| H    | 2.967439  | -0.232884 | -2.134114 |
| H    | 4.278101  | 0.018108  | 1.952115  |
| Br   | 5.433743  | 0.574162  | -0.714467 |
| Br   | -1.469790 | 0.100155  | 0.804844  |
| N    | -2.719437 | 1.799778  | 0.219560  |
| C    | -2.918262 | 2.041201  | -1.090036 |
| C    | -3.293762 | 3.493985  | -1.330954 |
| C    | -3.322571 | 4.096005  | 0.072156  |
| C    | -2.863587 | 2.952563  | 0.976649  |



|   |           |           |           |
|---|-----------|-----------|-----------|
| O | -2.660994 | 3.029412  | 2.169252  |
| O | -2.817234 | 1.211035  | -2.008192 |
| H | -2.538672 | 3.942509  | -1.981939 |
| H | -4.251175 | 3.532850  | -1.854943 |
| H | -4.321659 | 4.408666  | 0.385526  |
| H | -2.648508 | 4.944710  | 0.204843  |
| H | -3.057083 | -0.227671 | -1.759667 |

TS-3

|                                         |                |
|-----------------------------------------|----------------|
| M06-2X SCF energy (au):                 | -8487.50729783 |
| M06-2X enthalpy (au):                   | -8486.94615083 |
| M06-2X free energy (au):                | -8487.09002083 |
| MN15 SCF energy (au):                   | -8492.15791845 |
| MN15 enthalpy (au):                     | -8491.59677145 |
| MN15 free energy (au):                  | -8491.74064145 |
| MN15 free energy (quasi-harmonic) (au): | -8491.72807262 |

Cartesian coordinates

| ATOM | X         | Y         | Z         |
|------|-----------|-----------|-----------|
| C    | 0.438773  | 0.432155  | 2.672330  |
| C    | -0.142838 | 1.670051  | 2.967782  |
| H    | -1.227416 | 1.759191  | 2.918841  |
| H    | 1.505006  | 0.317407  | 2.861220  |
| C    | 0.587630  | 2.719998  | 3.749164  |
| H    | 0.218441  | 2.591340  | 4.777155  |
| H    | 1.658385  | 2.499160  | 3.763542  |
| C    | 0.352996  | 4.170497  | 3.319634  |
| H    | 0.755071  | 4.815086  | 4.104664  |
| H    | 0.925031  | 4.379632  | 2.410234  |
| C    | -1.125958 | 4.527895  | 3.077270  |
| H    | -1.256898 | 5.608323  | 3.191032  |
| H    | -1.789175 | 4.021492  | 3.783315  |
| C    | -1.543226 | 4.181704  | 1.669027  |
| O    | -0.842398 | 4.865942  | 0.778462  |
| O    | -2.387333 | 3.352888  | 1.366969  |
| C    | -0.286361 | -0.782320 | 2.310554  |
| C    | -1.621655 | -0.755273 | 1.886898  |
| C    | 0.399565  | -1.999180 | 2.374813  |
| C    | -2.263947 | -1.929529 | 1.529353  |
| H    | -2.157054 | 0.185209  | 1.794004  |
| C    | -0.238724 | -3.185148 | 2.033199  |
| H    | 1.442025  | -2.015431 | 2.678116  |
| C    | -1.557546 | -3.128857 | 1.599096  |
| H    | -3.288553 | -1.910423 | 1.176060  |
| H    | 0.291520  | -4.129744 | 2.073853  |
| Br   | -2.401892 | -4.725944 | 1.028248  |
| Br   | 0.416086  | 1.789360  | 0.792902  |
| N    | 0.631330  | 2.358326  | -1.379617 |
| C    | -0.138773 | 3.194306  | -2.120416 |
| C    | 0.039626  | 2.950128  | -3.603064 |
| C    | 1.046282  | 1.804779  | -3.653606 |
| C    | 1.240642  | 1.453468  | -2.194751 |
| O    | 1.848801  | 0.453087  | -1.796856 |
| O    | -0.931917 | 4.027469  | -1.657999 |
| H    | -0.938317 | 2.688939  | -4.017823 |
| H    | 0.377732  | 3.872623  | -4.080049 |
| H    | 2.014210  | 2.095081  | -4.071312 |
| H    | 0.696005  | 0.920874  | -4.189783 |
| H    | -0.985710 | 4.516015  | -0.150524 |

|   |           |           |           |
|---|-----------|-----------|-----------|
| O | 2.600294  | -0.496902 | 0.625941  |
| H | 2.256362  | -0.123064 | -0.214116 |
| C | 3.930937  | -0.117197 | 0.745196  |
| H | 4.524565  | -0.297108 | -0.160968 |
| C | 4.018019  | 1.374675  | 1.057896  |
| C | 4.512577  | -0.976054 | 1.856812  |
| F | 3.471888  | 2.075065  | 0.056528  |
| F | 3.347277  | 1.690761  | 2.177542  |
| F | 5.279790  | 1.785837  | 1.211301  |
| F | 3.841284  | -0.810857 | 3.008148  |
| F | 5.795718  | -0.688268 | 2.090181  |
| F | 4.426029  | -2.266688 | 1.526914  |
| O | -3.184874 | 2.592921  | -2.322281 |
| H | -2.679948 | 3.398700  | -2.116854 |
| C | -2.995740 | 1.674410  | -1.287238 |
| H | -2.205516 | 1.959267  | -0.580860 |
| C | -4.293946 | 1.554411  | -0.493326 |
| C | -2.601636 | 0.351146  | -1.930823 |
| F | -4.132195 | 0.825199  | 0.621598  |
| F | -4.728268 | 2.762387  | -0.136353 |
| F | -5.260216 | 0.973197  | -1.217028 |
| F | -3.413517 | 0.026516  | -2.938715 |
| F | -2.615116 | -0.647675 | -1.047305 |
| F | -1.358922 | 0.447483  | -2.438934 |
| O | 0.093812  | -1.518296 | -0.808546 |
| H | 0.625199  | -0.839424 | -1.265532 |
| C | 0.256626  | -2.734849 | -1.460425 |
| H | -0.399143 | -3.479083 | -0.995151 |
| C | -0.163528 | -2.597596 | -2.921274 |
| C | 1.696529  | -3.224204 | -1.311277 |
| F | 0.551183  | -1.637385 | -3.529836 |
| F | -0.000848 | -3.729917 | -3.609543 |
| F | -1.451681 | -2.251002 | -2.998781 |
| F | 1.899903  | -4.388605 | -1.936262 |
| F | 1.994661  | -3.395419 | -0.021057 |
| F | 2.562434  | -2.331578 | -1.813168 |

#### TS-3\_A

M06-2X SCF energy (au): -7697.93105768  
M06-2X enthalpy (au): -7697.44647868  
M06-2X free energy (au): -7697.56902368  
MN15 SCF energy (au): -7702.72261466  
MN15 enthalpy (au): -7702.23803566  
MN15 free energy (au): -7702.36058066  
MN15 free energy (quasi-harmonic) (au): -7702.34958198

#### Cartesian coordinates

| ATOM | X         | Y         | Z        |
|------|-----------|-----------|----------|
| C    | 0.982474  | -0.306318 | 2.858498 |
| C    | 0.361502  | 0.822424  | 3.425454 |
| H    | -0.719426 | 0.901655  | 3.324261 |
| H    | 2.029402  | -0.488891 | 3.099777 |
| C    | 0.993446  | 1.652616  | 4.498947 |
| H    | 0.582074  | 1.242369  | 5.432594 |
| H    | 2.074602  | 1.485656  | 4.522898 |
| C    | 0.682458  | 3.152082  | 4.434902 |
| H    | 0.982003  | 3.592518  | 5.388598 |
| H    | 1.295282  | 3.622296  | 3.659440 |
| C    | -0.798794 | 3.482322  | 4.168258 |

|    |           |           |           |
|----|-----------|-----------|-----------|
| H  | -1.003125 | 4.499373  | 4.516641  |
| H  | -1.470387 | 2.796459  | 4.691230  |
| C  | -1.116246 | 3.455288  | 2.690883  |
| O  | -0.408986 | 4.351569  | 2.025002  |
| O  | -1.898363 | 2.683948  | 2.155368  |
| C  | 0.273148  | -1.378902 | 2.163866  |
| C  | 0.943115  | -2.588419 | 1.958974  |
| C  | -1.030377 | -1.214736 | 1.676220  |
| C  | 0.324904  | -3.630195 | 1.277626  |
| H  | 1.958391  | -2.710046 | 2.326545  |
| C  | -1.652478 | -2.243461 | 0.987800  |
| H  | -1.556428 | -0.271729 | 1.796869  |
| C  | -0.960976 | -3.436356 | 0.786580  |
| H  | 0.844664  | -4.567774 | 1.113952  |
| H  | -2.650994 | -2.112003 | 0.588217  |
| Br | -1.781880 | -4.816443 | -0.211573 |
| Br | 1.058045  | 1.469964  | 1.446040  |
| N  | 1.368976  | 2.660968  | -0.510938 |
| C  | 0.509090  | 3.507766  | -1.103308 |
| C  | 0.784921  | 3.667593  | -2.582970 |
| C  | 1.948057  | 2.709955  | -2.824059 |
| C  | 2.211008  | 2.121934  | -1.449125 |
| O  | 3.063433  | 1.272752  | -1.209565 |
| O  | -0.425270 | 4.097665  | -0.521502 |
| H  | -0.125736 | 3.416531  | -3.133369 |
| H  | 1.023496  | 4.715233  | -2.782883 |
| H  | 2.856800  | 3.198883  | -3.182728 |
| H  | 1.711863  | 1.891900  | -3.509077 |
| H  | -0.501157 | 4.224868  | 1.026710  |
| O  | 3.112039  | -0.950181 | 0.296151  |
| H  | 3.165912  | -0.047822 | -0.093025 |
| C  | 2.737714  | -1.854103 | -0.691297 |
| H  | 2.514436  | -2.811865 | -0.213138 |
| C  | 1.460741  | -1.436678 | -1.445060 |
| C  | 3.879375  | -2.125547 | -1.663771 |
| F  | 1.713981  | -0.773666 | -2.584229 |
| F  | 0.728317  | -2.508955 | -1.773141 |
| F  | 0.715082  | -0.643639 | -0.675004 |
| F  | 4.884418  | -2.740525 | -1.030658 |
| F  | 4.373157  | -1.008927 | -2.204043 |
| F  | 3.468781  | -2.923422 | -2.661184 |
| O  | -2.560909 | 2.907652  | -1.627042 |
| H  | -1.993056 | 3.598266  | -1.233889 |
| C  | -2.347727 | 1.719848  | -0.925155 |
| H  | -1.591696 | 1.802601  | -0.132361 |
| C  | -3.663598 | 1.315510  | -0.268749 |
| C  | -1.867784 | 0.682015  | -1.932500 |
| F  | -4.154210 | 2.328530  | 0.443542  |
| F  | -4.583493 | 0.977830  | -1.182388 |
| F  | -3.512351 | 0.266411  | 0.555837  |
| F  | -0.621009 | 0.983177  | -2.332199 |
| F  | -2.639287 | 0.658769  | -3.022295 |
| F  | -1.849464 | -0.551619 | -1.416765 |

TS-3\_B

|                          |                |
|--------------------------|----------------|
| M06-2X SCF energy (au):  | -6908.34915798 |
| M06-2X enthalpy (au):    | -6907.94138098 |
| M06-2X free energy (au): | -6908.04561698 |
| MN15 SCF energy (au):    | -6913.28680346 |

MN15 enthalpy (au): -6912.87902646  
MN15 free energy (au): -6912.98326246  
MN15 free energy (quasi-harmonic) (au): -6912.97231148

Cartesian coordinates

| ATOM | X         | Y         | Z         |
|------|-----------|-----------|-----------|
| C    | 0.017198  | -0.555427 | 1.964278  |
| C    | -0.325586 | -1.851852 | 2.427623  |
| H    | 0.418780  | -2.645172 | 2.370842  |
| H    | -0.680071 | 0.250786  | 2.192701  |
| C    | -1.442888 | -2.041784 | 3.412852  |
| H    | -1.011245 | -1.696548 | 4.363426  |
| H    | -2.267477 | -1.357167 | 3.182761  |
| C    | -1.946571 | -3.473864 | 3.613534  |
| H    | -1.094945 | -4.148122 | 3.754000  |
| H    | -2.518190 | -3.484882 | 4.545173  |
| C    | -2.838531 | -4.010843 | 2.498561  |
| H    | -3.604438 | -3.285233 | 2.207880  |
| H    | -3.370555 | -4.904490 | 2.847435  |
| C    | -2.078105 | -4.427286 | 1.263172  |
| O    | -2.821152 | -4.376002 | 0.171169  |
| O    | -0.906542 | -4.767624 | 1.267879  |
| C    | 1.320245  | -0.142855 | 1.439322  |
| C    | 1.537472  | 1.226267  | 1.254569  |
| C    | 2.331625  | -1.057428 | 1.113414  |
| C    | 2.752021  | 1.689706  | 0.763716  |
| H    | 0.744971  | 1.929101  | 1.487494  |
| C    | 3.547296  | -0.605590 | 0.625299  |
| H    | 2.178197  | -2.126841 | 1.222416  |
| C    | 3.743798  | 0.765124  | 0.459275  |
| H    | 2.917798  | 2.750786  | 0.616575  |
| H    | 4.332495  | -1.308678 | 0.372065  |
| Br   | 5.405019  | 1.377592  | -0.208187 |
| Br   | -1.035297 | -1.686214 | 0.382680  |
| N    | -1.804241 | -2.092864 | -1.834199 |
| C    | -1.649177 | -3.227669 | -2.559752 |
| C    | -1.520029 | -2.937242 | -4.045138 |
| C    | -1.623122 | -1.416145 | -4.114251 |
| C    | -1.717373 | -1.010684 | -2.653310 |
| O    | -1.708540 | 0.163118  | -2.267338 |
| O    | -1.618236 | -4.374399 | -2.088841 |
| H    | -0.560975 | -3.326321 | -4.397069 |
| H    | -2.312885 | -3.465080 | -4.580121 |
| H    | -2.517244 | -1.063307 | -4.635029 |
| H    | -0.756399 | -0.928190 | -4.565620 |
| H    | -2.262254 | -4.500135 | -0.665440 |
| O    | -1.414613 | 1.471196  | 0.002769  |
| H    | -1.536782 | 0.810904  | -0.723619 |
| C    | -1.637235 | 2.721874  | -0.562925 |
| H    | -2.356764 | 2.697446  | -1.391211 |
| C    | -2.213675 | 3.608969  | 0.528621  |
| C    | -0.336156 | 3.298109  | -1.119961 |
| F    | -3.452819 | 3.218598  | 0.839318  |
| F    | -1.483161 | 3.546378  | 1.649919  |
| F    | -2.264554 | 4.890220  | 0.144162  |
| F    | -0.562231 | 4.357451  | -1.905381 |
| F    | 0.296909  | 2.370903  | -1.842296 |
| F    | 0.502370  | 3.697462  | -0.148204 |

TS-3'

B3LYP-D3 SCF energy (au): -8487.48092408  
B3LYP-D3 enthalpy (au): -8486.92196408  
B3LYP-D3 free energy (au): -8487.07273208  
M06 SCF energy (au): -8492.14091215  
M06 enthalpy (au): -8491.58195215  
M06 free energy (au): -8491.73272015  
M06 free energy (quasi-harmonic) (au): -8491.71403107

Cartesian coordinates

| ATOM | X         | Y         | Z         |
|------|-----------|-----------|-----------|
| C    | 0.989380  | -1.558051 | 1.986938  |
| C    | 1.630710  | -0.656881 | 2.904788  |
| H    | 1.645496  | -2.413406 | 1.793823  |
| H    | 1.071904  | -0.277038 | 3.756882  |
| C    | 3.069645  | -0.387871 | 2.848041  |
| H    | 3.450982  | -0.931299 | 3.732090  |
| H    | 3.520482  | -0.814388 | 1.948948  |
| C    | 3.466387  | 1.094918  | 3.018291  |
| H    | 3.008496  | 1.493308  | 3.928618  |
| H    | 4.550241  | 1.125749  | 3.145096  |
| C    | 3.085639  | 1.953864  | 1.818128  |
| H    | 3.519034  | 1.563391  | 0.892645  |
| H    | 3.456891  | 2.978135  | 1.939661  |
| C    | 1.603211  | 2.023625  | 1.615140  |
| O    | 0.794879  | 1.529300  | 2.394554  |
| O    | 1.232275  | 2.629486  | 0.504710  |
| C    | -0.449986 | -1.899974 | 2.155881  |
| C    | -0.874197 | -3.212262 | 1.948378  |
| C    | -1.391198 | -0.892381 | 2.391398  |
| C    | -2.231025 | -3.523577 | 1.940652  |
| H    | -0.144022 | -3.994823 | 1.761478  |
| C    | -2.745870 | -1.194531 | 2.405754  |
| H    | -1.070938 | 0.138547  | 2.518900  |
| C    | -3.147161 | -2.500669 | 2.149691  |
| H    | -2.564992 | -4.538245 | 1.752325  |
| H    | -3.483797 | -0.419897 | 2.571625  |
| Br   | -5.002964 | -2.866291 | 1.989995  |
| Br   | 1.183848  | -0.619408 | 0.132541  |
| N    | 1.222199  | 0.393574  | -2.038042 |
| C    | 0.099501  | 0.597336  | -2.744701 |
| C    | 0.382192  | 0.994962  | -4.179132 |
| C    | 1.908245  | 0.993887  | -4.239816 |
| C    | 2.311089  | 0.563656  | -2.838419 |
| O    | 3.478110  | 0.389362  | -2.479544 |
| O    | -1.056344 | 0.478720  | -2.282355 |
| H    | -0.089602 | 0.268602  | -4.846312 |
| H    | -0.072197 | 1.970555  | -4.370147 |
| H    | 2.339632  | 1.977075  | -4.444020 |
| H    | 2.323495  | 0.287266  | -4.962164 |
| H    | 0.271195  | 2.437064  | 0.366045  |
| O    | -1.247332 | 1.649027  | 0.045444  |
| H    | -1.146766 | 1.074412  | -0.762979 |
| C    | -2.318944 | 2.520063  | -0.161116 |
| H    | -3.132459 | 2.066235  | -0.737147 |
| C    | -2.851314 | 2.876424  | 1.219604  |
| C    | -1.844448 | 3.753213  | -0.924975 |
| F    | -3.770364 | 3.844817  | 1.160170  |
| F    | -3.416289 | 1.804945  | 1.785912  |

|   |           |           |           |
|---|-----------|-----------|-----------|
| F | -1.868231 | 3.285379  | 2.029364  |
| F | -0.946700 | 4.453517  | -0.215196 |
| F | -2.852833 | 4.571190  | -1.233204 |
| F | -1.248842 | 3.377701  | -2.062512 |
| O | -1.928340 | -1.688903 | -0.805031 |
| H | -1.529634 | -0.990085 | -1.366983 |
| C | -3.203765 | -1.998085 | -1.258385 |
| H | -3.627150 | -2.775252 | -0.612785 |
| C | -4.150724 | -0.800956 | -1.176695 |
| C | -3.138988 | -2.570816 | -2.670799 |
| F | -5.424376 | -1.172857 | -1.333865 |
| F | -4.038678 | -0.199181 | 0.011671  |
| F | -3.878250 | 0.121851  | -2.113685 |
| F | -2.469910 | -3.727164 | -2.662027 |
| F | -2.496417 | -1.742369 | -3.504442 |
| F | -4.356890 | -2.799396 | -3.175812 |
| O | 4.417707  | -0.339877 | -0.136839 |
| H | 3.905298  | -0.126029 | -0.960916 |
| C | 5.769160  | -0.196701 | -0.425134 |
| H | 6.030864  | -0.492033 | -1.449324 |
| C | 6.193110  | 1.259287  | -0.253527 |
| C | 6.515261  | -1.115764 | 0.529489  |
| F | 5.398842  | 2.047275  | -0.986510 |
| F | 6.092718  | 1.665267  | 1.022036  |
| F | 7.455256  | 1.464094  | -0.645020 |
| F | 6.231519  | -2.392317 | 0.256164  |
| F | 6.162155  | -0.892157 | 1.803432  |
| F | 7.840430  | -0.956246 | 0.439629  |

TS-4

|                                         |                |
|-----------------------------------------|----------------|
| M06-2X SCF energy (au):                 | -8487.49747763 |
| M06-2X enthalpy (au):                   | -8486.93740363 |
| M06-2X free energy (au):                | -8487.08600763 |
| MN15 SCF energy (au):                   | -8492.16872492 |
| MN15 enthalpy (au):                     | -8491.60865092 |
| MN15 free energy (au):                  | -8491.75725492 |
| MN15 free energy (quasi-harmonic) (au): | -8491.74064829 |

Cartesian coordinates

| ATOM | X        | Y         | Z         |
|------|----------|-----------|-----------|
| C    | 2.090364 | 1.618626  | -2.138109 |
| C    | 1.467677 | 2.959999  | -2.225669 |
| H    | 0.597026 | 3.071709  | -1.582537 |
| H    | 3.145533 | 1.569462  | -2.411775 |
| C    | 2.423142 | 4.144169  | -2.167526 |
| H    | 3.106125 | 4.085415  | -3.020706 |
| H    | 1.820929 | 5.049227  | -2.292944 |
| C    | 3.247358 | 4.246833  | -0.879915 |
| H    | 3.996525 | 3.448089  | -0.848447 |
| H    | 3.795725 | 5.190770  | -0.934647 |
| C    | 2.441388 | 4.218667  | 0.415724  |
| H    | 1.488562 | 4.755719  | 0.327497  |
| H    | 2.988799 | 4.700608  | 1.231014  |
| C    | 2.144487 | 2.815836  | 0.872282  |
| O    | 2.303744 | 1.824352  | 0.157032  |
| O    | 1.725204 | 2.724776  | 2.109842  |
| C    | 1.420003 | 0.394572  | -1.939432 |
| C    | 0.094567 | 0.337122  | -1.446250 |
| C    | 2.143125 | -0.798367 | -2.159741 |

|    |           |           |           |
|----|-----------|-----------|-----------|
| C  | -0.487933 | -0.880585 | -1.170569 |
| H  | -0.466274 | 1.245584  | -1.259946 |
| C  | 1.559482  | -2.024659 | -1.901473 |
| H  | 3.160646  | -0.745305 | -2.534456 |
| C  | 0.255217  | -2.048094 | -1.401921 |
| H  | -1.502014 | -0.946800 | -0.788784 |
| H  | 2.102969  | -2.946443 | -2.070419 |
| Br | -0.538650 | -3.697944 | -1.001304 |
| Br | 0.736331  | 2.837604  | -4.069998 |
| H  | 1.686629  | 1.736527  | 2.389266  |
| N  | -0.480687 | 0.301680  | 2.407607  |
| C  | 0.687734  | -0.343917 | 2.481183  |
| C  | 0.579233  | -1.847156 | 2.312604  |
| C  | -0.931072 | -2.049176 | 2.259228  |
| C  | -1.453107 | -0.622974 | 2.233563  |
| O  | -2.656428 | -0.328350 | 2.092235  |
| O  | 1.783273  | 0.246502  | 2.665512  |
| H  | 1.089152  | -2.143313 | 1.387484  |
| H  | 1.080445  | -2.356597 | 3.139010  |
| H  | -1.327356 | -2.538992 | 3.153351  |
| H  | -1.290617 | -2.605675 | 1.391912  |
| O  | -3.002764 | 2.344504  | 2.656178  |
| H  | -2.890603 | 1.377205  | 2.491972  |
| C  | -1.862883 | 3.003674  | 2.196430  |
| H  | -0.933366 | 2.484876  | 2.453028  |
| C  | -1.908323 | 3.096150  | 0.678386  |
| C  | -1.829092 | 4.372070  | 2.846416  |
| F  | -0.735360 | 3.525883  | 0.173340  |
| F  | -2.146315 | 1.881688  | 0.162377  |
| F  | -2.862009 | 3.915794  | 0.227989  |
| F  | -1.651711 | 4.252056  | 4.165351  |
| F  | -2.961938 | 5.057189  | 2.654835  |
| F  | -0.817560 | 5.105700  | 2.357933  |
| O  | 3.829174  | -1.333129 | 2.302496  |
| H  | 3.116735  | -0.746525 | 2.660205  |
| C  | 3.874347  | -1.077507 | 0.935036  |
| H  | 2.906972  | -0.755132 | 0.524270  |
| C  | 4.879205  | 0.033630  | 0.640948  |
| C  | 4.259133  | -2.383881 | 0.258884  |
| F  | 6.142407  | -0.371164 | 0.830400  |
| F  | 4.782097  | 0.469093  | -0.625125 |
| F  | 4.664720  | 1.072271  | 1.453564  |
| F  | 5.319694  | -2.948894 | 0.838950  |
| F  | 4.551141  | -2.207120 | -1.039414 |
| F  | 3.244990  | -3.255875 | 0.334881  |
| O  | -3.342828 | -1.926167 | 0.046234  |
| H  | -3.303890 | -1.329195 | 0.828731  |
| C  | -4.405821 | -2.813771 | 0.173989  |
| H  | -5.330520 | -2.345219 | 0.533372  |
| C  | -4.684150 | -3.359267 | -1.218065 |
| C  | -4.044074 | -3.916651 | 1.163009  |
| F  | -5.650659 | -4.284429 | -1.195442 |
| F  | -5.078350 | -2.369252 | -2.024686 |
| F  | -3.596816 | -3.914218 | -1.762841 |
| F  | -5.051290 | -4.774465 | 1.353032  |
| F  | -3.744696 | -3.364567 | 2.347746  |
| F  | -2.975670 | -4.620517 | 0.766610  |

TS-4\_A

M06-2X SCF energy (au): -7697.93238391  
M06-2X enthalpy (au): -7697.44830791  
M06-2X free energy (au): -7697.57157291  
MN15 SCF energy (au): -7702.73924001  
MN15 enthalpy (au): -7702.25516401  
MN15 free energy (au): -7702.37842901  
MN15 free energy (quasi-harmonic) (au): -7702.36648110

Cartesian coordinates

| ATOM | X         | Y         | Z         |
|------|-----------|-----------|-----------|
| C    | 0.223737  | 1.709821  | 1.330564  |
| C    | 1.230547  | 2.405593  | 0.488148  |
| H    | 1.545327  | 1.779367  | -0.345937 |
| H    | -0.547867 | 2.343426  | 1.769717  |
| C    | 0.838399  | 3.830813  | 0.100712  |
| H    | 0.841959  | 4.442387  | 1.008772  |
| H    | 1.620055  | 4.221082  | -0.557685 |
| C    | -0.535446 | 3.978953  | -0.570045 |
| H    | -1.332751 | 3.669106  | 0.114659  |
| H    | -0.681535 | 5.047242  | -0.751740 |
| C    | -0.700865 | 3.237083  | -1.888572 |
| H    | 0.113820  | 3.445537  | -2.588604 |
| H    | -1.626251 | 3.544156  | -2.390742 |
| C    | -0.801028 | 1.747513  | -1.715480 |
| O    | -0.893611 | 1.200726  | -0.613590 |
| O    | -0.801307 | 1.071153  | -2.834052 |
| C    | 0.234440  | 0.368325  | 1.753151  |
| C    | 1.170460  | -0.589009 | 1.287028  |
| C    | -0.801309 | -0.028438 | 2.631848  |
| C    | 1.063709  | -1.901586 | 1.698455  |
| H    | 1.967546  | -0.298595 | 0.609595  |
| C    | -0.923767 | -1.343515 | 3.030652  |
| H    | -1.503590 | 0.715598  | 2.991463  |
| C    | 0.022715  | -2.259634 | 2.569121  |
| H    | 1.779739  | -2.645446 | 1.367275  |
| H    | -1.724531 | -1.657863 | 3.689480  |
| Br   | -0.098326 | -4.035707 | 3.155853  |
| Br   | 2.824383  | 2.481399  | 1.659115  |
| H    | -0.733757 | 0.059130  | -2.648578 |
| N    | -1.631966 | -1.958263 | -0.834956 |
| C    | -0.598681 | -2.169722 | -1.641150 |
| C    | 0.068389  | -3.521307 | -1.469391 |
| C    | -0.832623 | -4.192461 | -0.439898 |
| C    | -1.783784 | -3.067121 | -0.052491 |
| O    | -2.613077 | -3.145331 | 0.861531  |
| O    | -0.163652 | -1.333106 | -2.488122 |
| H    | 0.120428  | -4.031697 | -2.433945 |
| H    | 1.093858  | -3.365527 | -1.118513 |
| H    | -0.319593 | -4.578589 | 0.441924  |
| H    | -1.426022 | -5.010214 | -0.859806 |
| O    | -4.359100 | -1.147899 | 0.364200  |
| H    | -3.730955 | -1.875145 | 0.607428  |
| C    | -3.660657 | 0.057270  | 0.381538  |
| H    | -2.574000 | -0.079769 | 0.367388  |
| C    | -4.036868 | 0.833674  | -0.874228 |
| C    | -4.033678 | 0.833548  | 1.637600  |
| F    | -3.599035 | 2.104765  | -0.827720 |
| F    | -3.511834 | 0.267345  | -1.963014 |
| F    | -5.364219 | 0.875838  | -1.044854 |



|   |           |           |           |
|---|-----------|-----------|-----------|
| F | -5.309771 | 1.235647  | 1.632353  |
| F | -3.266819 | 1.926994  | 1.800720  |
| F | -3.861095 | 0.060863  | 2.719151  |
| O | 1.908836  | 0.059813  | -1.622237 |
| H | 1.156631  | -0.528050 | -1.875360 |
| C | 2.647286  | 0.335301  | -2.769358 |
| H | 2.030530  | 0.432965  | -3.671689 |
| C | 3.328988  | 1.670974  | -2.517280 |
| C | 3.646567  | -0.792250 | -2.997967 |
| F | 2.407329  | 2.647638  | -2.483568 |
| F | 3.953659  | 1.684182  | -1.334767 |
| F | 4.216586  | 1.973710  | -3.465517 |
| F | 4.505575  | -0.901284 | -1.977559 |
| F | 4.355298  | -0.622734 | -4.117797 |
| F | 2.985706  | -1.953057 | -3.096673 |

TS-4\_B

|                                         |                |
|-----------------------------------------|----------------|
| M06-2X SCF energy (au):                 | -6908.35513497 |
| M06-2X enthalpy (au):                   | -6907.94812597 |
| M06-2X free energy (au):                | -6908.04784797 |
| MN15 SCF energy (au):                   | -6913.30015606 |
| MN15 enthalpy (au):                     | -6912.89314706 |
| MN15 free energy (au):                  | -6912.99286906 |
| MN15 free energy (quasi-harmonic) (au): | -6912.98533309 |

Cartesian coordinates

| ATOM | X         | Y         | Z         |
|------|-----------|-----------|-----------|
| C    | 2.539130  | 0.826995  | 0.022313  |
| C    | 3.149445  | -0.510568 | 0.013577  |
| H    | 2.502579  | -1.320493 | 0.343199  |
| H    | 3.099658  | 1.595355  | -0.516053 |
| C    | 4.084052  | -0.880171 | -1.129718 |
| H    | 4.674621  | -0.000324 | -1.411422 |
| H    | 4.781746  | -1.619555 | -0.727421 |
| C    | 3.408318  | -1.497836 | -2.366156 |
| H    | 4.192219  | -2.029699 | -2.912432 |
| H    | 2.677323  | -2.246674 | -2.049843 |
| C    | 2.754280  | -0.513904 | -3.330047 |
| H    | 2.429460  | -1.029387 | -4.241677 |
| H    | 3.454429  | 0.265779  | -3.650689 |
| C    | 1.541706  | 0.159540  | -2.748389 |
| O    | 1.091506  | -0.159277 | -1.647201 |
| O    | 1.024239  | 1.109032  | -3.481004 |
| C    | 1.362451  | 1.240609  | 0.689596  |
| C    | 0.449016  | 0.315210  | 1.246028  |
| C    | 1.060738  | 2.618547  | 0.690464  |
| C    | -0.739912 | 0.760426  | 1.782082  |
| H    | 0.653671  | -0.749468 | 1.217308  |
| C    | -0.113647 | 3.075623  | 1.260829  |
| H    | 1.757274  | 3.321620  | 0.243954  |
| C    | -0.999431 | 2.138305  | 1.789993  |
| H    | -1.463661 | 0.063244  | 2.187828  |
| H    | -0.346112 | 4.134174  | 1.280767  |
| Br   | -2.613020 | 2.747171  | 2.539008  |
| Br   | 4.266944  | -0.003965 | 1.610257  |
| H    | 0.302919  | 1.633593  | -2.927857 |
| N    | -2.054281 | 0.812076  | -1.951917 |
| C    | -1.661314 | 2.088123  | -1.811279 |
| C    | -2.732888 | 2.999312  | -1.229177 |

|   |           |           |           |
|---|-----------|-----------|-----------|
| C | -3.859681 | 2.023030  | -0.920187 |
| C | -3.312079 | 0.709519  | -1.456316 |
| O | -3.961920 | -0.348537 | -1.419298 |
| O | -0.537572 | 2.529139  | -2.147053 |
| H | -2.348854 | 3.537676  | -0.358946 |
| H | -2.996601 | 3.745302  | -1.984288 |
| H | -4.808220 | 2.254847  | -1.409761 |
| H | -4.054305 | 1.909234  | 0.150043  |
| O | -2.399629 | -2.375840 | -1.843170 |
| H | -3.029450 | -1.596025 | -1.785456 |
| C | -1.379745 | -2.162787 | -0.920112 |
| H | -1.039642 | -1.118515 | -0.882090 |
| C | -1.870736 | -2.554238 | 0.470330  |
| C | -0.201521 | -3.014687 | -1.362331 |
| F | -0.906565 | -2.464117 | 1.405317  |
| F | -2.864128 | -1.737054 | 0.845492  |
| F | -2.342912 | -3.803747 | 0.505399  |
| F | 0.846281  | -2.888460 | -0.529389 |
| F | 0.201346  | -2.661167 | -2.585960 |
| F | -0.517867 | -4.315683 | -1.407643 |

TS-5

|                                         |                |
|-----------------------------------------|----------------|
| M06-2X SCF energy (au):                 | -8487.49392992 |
| M06-2X enthalpy (au):                   | -8486.93392292 |
| M06-2X free energy (au):                | -8487.08358192 |
| MN15 SCF energy (au):                   | -8492.16476693 |
| MN15 enthalpy (au):                     | -8491.60475993 |
| MN15 free energy (au):                  | -8491.75441893 |
| MN15 free energy (quasi-harmonic) (au): | -8491.73650201 |

Cartesian coordinates

| ATOM | X         | Y         | Z         |
|------|-----------|-----------|-----------|
| C    | -0.378171 | 2.463770  | 1.589147  |
| C    | 0.880582  | 2.784214  | 0.935180  |
| H    | -1.214088 | 3.115528  | 1.336298  |
| H    | 1.697302  | 2.071931  | 1.016280  |
| C    | 1.048108  | 3.920555  | -0.029022 |
| H    | 1.842272  | 4.563510  | 0.359767  |
| H    | 0.127336  | 4.511331  | -0.078538 |
| C    | 1.491960  | 3.453848  | -1.430962 |
| H    | 2.287094  | 2.709273  | -1.327651 |
| H    | 1.929141  | 4.323882  | -1.926299 |
| C    | 0.380041  | 2.906628  | -2.315748 |
| H    | -0.425173 | 3.640142  | -2.447248 |
| H    | 0.755642  | 2.673861  | -3.316946 |
| C    | -0.242137 | 1.662341  | -1.751333 |
| O    | 0.025264  | 1.251181  | -0.626918 |
| O    | -1.100809 | 1.055929  | -2.536539 |
| C    | -0.731985 | 1.154453  | 2.139166  |
| C    | 0.207008  | 0.136691  | 2.362012  |
| C    | -2.085141 | 0.930373  | 2.409814  |
| C    | -0.204932 | -1.083758 | 2.873916  |
| H    | 1.263676  | 0.277637  | 2.158427  |
| C    | -2.508688 | -0.290261 | 2.919087  |
| H    | -2.814502 | 1.711518  | 2.223584  |
| C    | -1.558108 | -1.275598 | 3.156142  |
| H    | 0.520840  | -1.867610 | 3.061572  |
| H    | -3.558983 | -0.465841 | 3.123786  |
| Br   | -2.122420 | -2.929829 | 3.875219  |

|    |           |           |           |
|----|-----------|-----------|-----------|
| Br | 0.770746  | 3.618217  | 2.959180  |
| H  | -1.586061 | 0.341174  | -1.991203 |
| N  | -0.462198 | -1.776848 | -0.949339 |
| C  | -1.756118 | -1.590710 | -0.655773 |
| C  | -2.374944 | -2.726247 | 0.138525  |
| C  | -1.172868 | -3.631154 | 0.392533  |
| C  | -0.059412 | -2.913701 | -0.351018 |
| O  | 1.117175  | -3.337160 | -0.394369 |
| O  | -2.403888 | -0.584393 | -1.035654 |
| H  | -3.147206 | -3.193323 | -0.479630 |
| H  | -2.860905 | -2.348930 | 1.041612  |
| H  | -0.908998 | -3.727044 | 1.449435  |
| H  | -1.282001 | -4.640581 | -0.012004 |
| O  | 2.583393  | -2.171133 | 1.608211  |
| H  | 1.991561  | -2.718373 | 1.053955  |
| C  | 3.683888  | -1.824872 | 0.824199  |
| H  | 3.784152  | -2.435916 | -0.079548 |
| C  | 4.931082  | -2.043783 | 1.667937  |
| C  | 3.554656  | -0.371977 | 0.375034  |
| F  | 4.832138  | -1.447604 | 2.860763  |
| F  | 6.024452  | -1.567674 | 1.059678  |
| F  | 5.112377  | -3.349635 | 1.885849  |
| F  | 4.473763  | -0.044070 | -0.534640 |
| F  | 2.343893  | -0.154757 | -0.146461 |
| F  | 3.686596  | 0.481562  | 1.410820  |
| O  | -4.447774 | 0.409146  | 0.321011  |
| H  | -3.663294 | -0.003025 | -0.127570 |
| C  | -4.921033 | 1.460866  | -0.454196 |
| H  | -5.894033 | 1.780842  | -0.068738 |
| C  | -3.979089 | 2.658936  | -0.358440 |
| C  | -5.133491 | 1.061391  | -1.916820 |
| F  | -2.703586 | 2.296076  | -0.569149 |
| F  | -4.286631 | 3.613375  | -1.242034 |
| F  | -4.030278 | 3.202812  | 0.865908  |
| F  | -5.676789 | -0.154596 | -1.987284 |
| F  | -3.984767 | 1.038279  | -2.609587 |
| F  | -5.952436 | 1.920608  | -2.535214 |
| O  | 2.564823  | -1.998745 | -2.256759 |
| H  | 2.032591  | -2.486045 | -1.576528 |
| C  | 1.699839  | -1.139459 | -2.932599 |
| H  | 0.975758  | -0.659879 | -2.267765 |
| C  | 2.533367  | -0.057167 | -3.590039 |
| C  | 0.894433  | -1.917907 | -3.970877 |
| F  | 3.588534  | -0.551240 | -4.243288 |
| F  | 1.796381  | 0.642915  | -4.468810 |
| F  | 2.996358  | 0.805225  | -2.675940 |
| F  | -0.170359 | -1.223455 | -4.390997 |
| F  | 0.455769  | -3.067279 | -3.446462 |
| F  | 1.625498  | -2.229659 | -5.053480 |

#### TS-5\_A

|                                         |                |
|-----------------------------------------|----------------|
| M06-2X SCF energy (au):                 | -7697.92563019 |
| M06-2X enthalpy (au):                   | -7697.44242319 |
| M06-2X free energy (au):                | -7697.56711719 |
| MN15 SCF energy (au):                   | -7702.73146922 |
| MN15 enthalpy (au):                     | -7702.24826222 |
| MN15 free energy (au):                  | -7702.37295622 |
| MN15 free energy (quasi-harmonic) (au): | -7702.36042403 |

Cartesian coordinates

| ATOM | X         | Y         | Z         |
|------|-----------|-----------|-----------|
| C    | -0.958115 | 0.390225  | 2.195014  |
| C    | -0.895851 | 1.843217  | 2.133646  |
| H    | -1.929441 | -0.042006 | 1.965059  |
| H    | 0.077771  | 2.318294  | 2.214317  |
| C    | -2.056787 | 2.725034  | 1.785601  |
| H    | -2.301819 | 3.317354  | 2.670828  |
| H    | -2.931083 | 2.115328  | 1.532275  |
| C    | -1.700451 | 3.711853  | 0.652197  |
| H    | -0.674219 | 4.064742  | 0.791810  |
| H    | -2.355292 | 4.579856  | 0.752672  |
| C    | -1.870880 | 3.136580  | -0.747184 |
| H    | -2.922779 | 2.938540  | -0.975276 |
| H    | -1.512114 | 3.841957  | -1.505761 |
| C    | -1.113019 | 1.853876  | -0.932089 |
| O    | -0.344500 | 1.423717  | -0.071546 |
| O    | -1.337985 | 1.227789  | -2.054817 |
| C    | 0.196816  | -0.499062 | 2.034024  |
| C    | 1.519884  | -0.044818 | 2.138715  |
| C    | -0.058321 | -1.843362 | 1.748028  |
| C    | 2.573760  | -0.929831 | 1.988057  |
| H    | 1.748870  | 0.995401  | 2.343016  |
| C    | 0.994549  | -2.742381 | 1.605439  |
| H    | -1.081438 | -2.193476 | 1.642973  |
| C    | 2.296131  | -2.276070 | 1.748195  |
| H    | 3.598077  | -0.581838 | 2.058027  |
| H    | 0.799659  | -3.790585 | 1.406379  |
| Br   | 3.733855  | -3.490792 | 1.623207  |
| Br   | -1.179628 | 1.061112  | 4.186797  |
| H    | -0.922084 | 0.272791  | -2.035069 |
| N    | 1.514106  | -0.892405 | -1.457194 |
| C    | 0.475943  | -1.641741 | -1.813597 |
| C    | 0.791771  | -3.117280 | -1.971205 |
| C    | 2.299348  | -3.146399 | -1.743144 |
| C    | 2.606207  | -1.704029 | -1.355514 |
| O    | 3.723841  | -1.321001 | -0.991808 |
| O    | -0.683247 | -1.184894 | -2.020308 |
| H    | 0.475221  | -3.455590 | -2.960882 |
| H    | 0.225824  | -3.684298 | -1.225299 |
| H    | 2.630721  | -3.818079 | -0.948402 |
| H    | 2.865663  | -3.395084 | -2.645264 |
| O    | 3.866837  | 1.276024  | -0.310411 |
| H    | 3.851007  | 0.306097  | -0.531736 |
| C    | 2.654448  | 1.806890  | -0.749874 |
| H    | 1.799050  | 1.167777  | -0.517075 |
| C    | 2.653150  | 1.990655  | -2.268331 |
| C    | 2.445210  | 3.142641  | -0.063048 |
| F    | 3.320526  | 3.092985  | -2.654898 |
| F    | 1.402375  | 2.101081  | -2.740435 |
| F    | 3.235903  | 0.952308  | -2.870591 |
| F    | 1.414463  | 3.806441  | -0.612593 |
| F    | 2.165225  | 2.978671  | 1.241854  |
| F    | 3.521745  | 3.930143  | -0.129982 |
| O    | -3.099214 | -2.249897 | -2.063092 |
| H    | -2.126686 | -2.079580 | -2.085192 |
| C    | -3.717622 | -1.004646 | -2.162694 |
| H    | -3.149173 | -0.277179 | -2.755328 |
| C    | -5.053405 | -1.222124 | -2.854426 |

|   |           |           |           |
|---|-----------|-----------|-----------|
| C | -3.890917 | -0.413254 | -0.767196 |
| F | -5.770136 | -2.179306 | -2.256415 |
| F | -5.788279 | -0.102671 | -2.862446 |
| F | -4.856921 | -1.597550 | -4.121428 |
| F | -2.701771 | -0.395951 | -0.139233 |
| F | -4.726496 | -1.132441 | -0.011610 |
| F | -4.345857 | 0.846032  | -0.796726 |

TS-5\_B

|                                         |                |
|-----------------------------------------|----------------|
| M06-2X SCF energy (au):                 | -6908.35354453 |
| M06-2X enthalpy (au):                   | -6907.94668053 |
| M06-2X free energy (au):                | -6908.04546753 |
| MN15 SCF energy (au):                   | -6913.29632999 |
| MN15 enthalpy (au):                     | -6912.88946599 |
| MN15 free energy (au):                  | -6912.98825299 |
| MN15 free energy (quasi-harmonic) (au): | -6912.98127946 |

Cartesian coordinates

| ATOM | X         | Y         | Z         |
|------|-----------|-----------|-----------|
| C    | -0.105304 | -1.062214 | -1.771122 |
| C    | -1.384946 | -1.414921 | -2.369909 |
| H    | 0.288319  | -0.089774 | -2.064875 |
| H    | -1.886647 | -2.318637 | -2.036224 |
| C    | -2.097983 | -0.539380 | -3.352026 |
| H    | -2.295493 | -1.144441 | -4.241105 |
| H    | -1.458362 | 0.299588  | -3.642026 |
| C    | -3.459632 | -0.032240 | -2.836252 |
| H    | -4.047608 | -0.877423 | -2.464256 |
| H    | -3.983769 | 0.369008  | -3.706850 |
| C    | -3.373344 | 1.055927  | -1.775801 |
| H    | -2.731522 | 1.878759  | -2.106077 |
| H    | -4.358835 | 1.487784  | -1.576726 |
| C    | -2.832251 | 0.537096  | -0.472446 |
| O    | -2.295210 | -0.571606 | -0.392981 |
| O    | -2.974803 | 1.323115  | 0.556113  |
| C    | 0.422707  | -1.620065 | -0.521047 |
| C    | -0.263219 | -2.595430 | 0.216220  |
| C    | 1.643909  | -1.121284 | -0.056628 |
| C    | 0.275944  | -3.073119 | 1.398913  |
| H    | -1.230813 | -2.969676 | -0.098450 |
| C    | 2.201305  | -1.607250 | 1.120719  |
| H    | 2.160163  | -0.341651 | -0.609849 |
| C    | 1.504830  | -2.576675 | 1.832544  |
| H    | -0.253137 | -3.819164 | 1.980895  |
| H    | 3.146075  | -1.217419 | 1.483301  |
| Br   | 2.224765  | -3.240879 | 3.449749  |
| Br   | 0.375338  | -2.269595 | -3.435487 |
| H    | -2.635177 | 0.821781  | 1.424717  |
| N    | -0.175978 | 0.927759  | 1.994631  |
| C    | -0.995268 | 0.217917  | 2.787843  |
| C    | -0.300652 | -0.393982 | 3.994392  |
| C    | 1.091253  | 0.221092  | 3.906165  |
| C    | 1.053962  | 0.926043  | 2.559843  |
| O    | 2.054556  | 1.460732  | 2.049778  |
| O    | -2.220936 | 0.072020  | 2.574619  |
| H    | -0.292376 | -1.484268 | 3.890082  |
| H    | -0.853099 | -0.149571 | 4.904172  |
| H    | 1.272083  | 0.974328  | 4.679065  |
| H    | 1.914314  | -0.495497 | 3.944313  |

|   |           |          |           |
|---|-----------|----------|-----------|
| O | 1.320565  | 3.246347 | 0.315833  |
| H | 1.599404  | 2.500939 | 0.926300  |
| C | 0.189813  | 2.876996 | -0.404637 |
| H | -0.224212 | 1.909792 | -0.090160 |
| C | 0.569411  | 2.783997 | -1.873046 |
| C | -0.878213 | 3.933393 | -0.156487 |
| F | 0.992745  | 3.948736 | -2.370151 |
| F | -0.455244 | 2.364571 | -2.637426 |
| F | 1.564625  | 1.894716 | -2.029203 |
| F | -1.271242 | 3.899873 | 1.118936  |
| F | -0.415663 | 5.165966 | -0.404240 |
| F | -1.964067 | 3.753295 | -0.925373 |

TS-6

M06-2X SCF energy (au): -9449.32270237  
M06-2X enthalpy (au): -9448.71102937  
M06-2X free energy (au): -9448.88272037  
MN15 SCF energy (au): -9453.86521935  
MN15 enthalpy (au): -9453.25354635  
MN15 free energy (au): -9453.42523735  
MN15 free energy (quasi-harmonic) (au): -9453.40234598

Cartesian coordinates

| ATOM | X         | Y         | Z         |
|------|-----------|-----------|-----------|
| C    | 2.515659  | -1.453581 | -1.271386 |
| C    | 1.877615  | -0.857659 | -2.339239 |
| H    | 2.087164  | -2.368086 | -0.860855 |
| H    | 2.321915  | 0.032212  | -2.788336 |
| C    | 0.726119  | -1.493413 | -3.062231 |
| H    | 1.169319  | -2.257126 | -3.715793 |
| H    | 0.086159  | -2.034833 | -2.352792 |
| C    | -0.088801 | -0.538482 | -3.940900 |
| H    | 0.591047  | -0.008886 | -4.616728 |
| H    | -0.753887 | -1.139134 | -4.566699 |
| C    | -0.925915 | 0.498548  | -3.187085 |
| H    | -1.513751 | 1.080330  | -3.908802 |
| H    | -0.314130 | 1.207977  | -2.627093 |
| C    | -1.932767 | -0.105867 | -2.241019 |
| O    | -2.455324 | -1.236867 | -2.708678 |
| O    | -2.282947 | 0.396483  | -1.187765 |
| C    | 3.798299  | -1.022218 | -0.702943 |
| C    | 4.676307  | -0.172051 | -1.385874 |
| C    | 4.140128  | -1.480445 | 0.574487  |
| C    | 5.870959  | 0.224001  | -0.797600 |
| H    | 4.446591  | 0.172018  | -2.389609 |
| C    | 5.328090  | -1.085723 | 1.175789  |
| H    | 3.459069  | -2.140197 | 1.105638  |
| C    | 6.177928  | -0.231604 | 0.480967  |
| H    | 6.557447  | 0.873236  | -1.330008 |
| H    | 5.586937  | -1.435030 | 2.169093  |
| Br   | 7.801298  | 0.318689  | 1.289729  |
| Br   | 0.933819  | 0.113402  | -0.384996 |
| N    | -0.366002 | 1.312142  | 0.711476  |
| C    | -1.360401 | 0.796261  | 1.394443  |
| C    | -2.536736 | 1.705959  | 1.531571  |
| C    | -2.145232 | 2.888348  | 0.639798  |
| C    | -0.786427 | 2.508220  | 0.098829  |
| O    | -0.128369 | 3.073700  | -0.746328 |
| O    | -1.245754 | -0.389846 | 1.878487  |

|   |           |           |           |
|---|-----------|-----------|-----------|
| H | -3.437509 | 1.186008  | 1.190543  |
| H | -2.659651 | 1.964836  | 2.587253  |
| H | -2.067107 | 3.835223  | 1.178748  |
| H | -2.824283 | 3.017967  | -0.204290 |
| H | -3.153155 | -1.551755 | -2.090884 |
| S | -3.349012 | -2.378724 | 0.386941  |
| O | -4.242841 | -2.019825 | -0.741592 |
| O | -3.585611 | -1.576459 | 1.601911  |
| O | -1.944551 | -2.548856 | -0.004144 |
| H | -2.119058 | -0.759677 | 2.164597  |
| C | -3.917466 | -4.063049 | 0.831171  |
| F | -3.776889 | -4.863251 | -0.218716 |
| F | -3.198523 | -4.542388 | 1.839953  |
| F | -5.194899 | -4.024658 | 1.186569  |
| O | -5.098399 | 0.555549  | -0.133299 |
| H | -4.976201 | -0.365330 | -0.435519 |
| C | -5.920495 | 1.253610  | -1.012589 |
| H | -6.832085 | 0.709397  | -1.289023 |
| C | -6.343055 | 2.514355  | -0.272750 |
| C | -5.177218 | 1.572258  | -2.307261 |
| F | -5.283438 | 3.184192  | 0.200022  |
| F | -7.032565 | 3.342281  | -1.063840 |
| F | -7.113843 | 2.197277  | 0.770356  |
| F | -4.128185 | 2.380813  | -2.113423 |
| F | -5.977828 | 2.155445  | -3.205310 |
| F | -4.715983 | 0.435409  | -2.847212 |
| O | 2.568641  | 2.470022  | -1.585567 |
| H | 1.639266  | 2.637147  | -1.325466 |
| C | 3.417950  | 3.195587  | -0.751945 |
| H | 4.454334  | 2.975354  | -1.026877 |
| C | 3.198968  | 4.692549  | -0.957938 |
| C | 3.237946  | 2.789160  | 0.709313  |
| F | 3.330234  | 4.992776  | -2.252834 |
| F | 1.967121  | 5.062572  | -0.579632 |
| F | 4.076849  | 5.431415  | -0.272761 |
| F | 3.552400  | 1.506043  | 0.887186  |
| F | 1.966570  | 2.948460  | 1.106855  |
| F | 4.012732  | 3.519421  | 1.519406  |
| O | 0.600990  | -2.641536 | 1.108628  |
| H | -0.180760 | -2.212846 | 0.715792  |
| C | 0.217008  | -3.912966 | 1.532824  |
| H | -0.535835 | -4.378025 | 0.885974  |
| C | 1.463419  | -4.781230 | 1.486969  |
| C | -0.369346 | -3.824594 | 2.938595  |
| F | 1.890026  | -4.901473 | 0.224801  |
| F | 2.467142  | -4.252510 | 2.198124  |
| F | 1.223125  | -6.006248 | 1.964109  |
| F | -0.872736 | -4.994764 | 3.343012  |
| F | -1.361926 | -2.922104 | 2.954653  |
| F | 0.538349  | -3.432584 | 3.838837  |

#### TS-6\_A

|                                         |                |
|-----------------------------------------|----------------|
| M06-2X SCF energy (au):                 | -8659.75575246 |
| M06-2X enthalpy (au):                   | -8659.22113646 |
| M06-2X free energy (au):                | -8659.36844546 |
| MN15 SCF energy (au):                   | -8664.43190282 |
| MN15 enthalpy (au):                     | -8663.89728682 |
| MN15 free energy (au):                  | -8664.04459582 |
| MN15 free energy (quasi-harmonic) (au): | -8664.02629736 |

Cartesian coordinates

| ATOM | X         | Y         | Z         |
|------|-----------|-----------|-----------|
| C    | 0.873589  | -0.811735 | 1.828071  |
| C    | 0.514341  | 0.505331  | 1.983825  |
| H    | 1.858023  | -1.128322 | 2.172182  |
| H    | -0.477927 | 0.811751  | 1.656104  |
| C    | 1.343425  | 1.495491  | 2.744913  |
| H    | 1.098909  | 1.323713  | 3.803330  |
| H    | 2.405540  | 1.253331  | 2.631331  |
| C    | 1.078021  | 2.975516  | 2.448670  |
| H    | 0.025763  | 3.205902  | 2.646789  |
| H    | 1.669731  | 3.559304  | 3.158806  |
| C    | 1.423896  | 3.441538  | 1.033733  |
| H    | 2.357582  | 3.007066  | 0.665043  |
| H    | 1.559771  | 4.530565  | 1.024981  |
| C    | 0.325265  | 3.171861  | 0.036948  |
| O    | 0.766757  | 3.111908  | -1.223308 |
| O    | -0.850918 | 3.062469  | 0.322177  |
| C    | -0.047560 | -1.847048 | 1.325423  |
| C    | -1.428820 | -1.737203 | 1.509655  |
| C    | 0.461867  | -2.933655 | 0.605689  |
| C    | -2.295637 | -2.673017 | 0.956911  |
| H    | -1.841284 | -0.908440 | 2.078201  |
| C    | -0.391624 | -3.874134 | 0.043828  |
| H    | 1.534323  | -3.024571 | 0.456992  |
| C    | -1.764644 | -3.723845 | 0.218447  |
| H    | -3.367458 | -2.576492 | 1.095436  |
| H    | 0.003345  | -4.705930 | -0.528816 |
| Br   | -2.940435 | -4.990722 | -0.562218 |
| Br   | 1.557500  | 0.255560  | -0.233766 |
| N    | 2.296222  | 0.675415  | -2.097025 |
| C    | 2.007339  | 0.141311  | -3.270740 |
| C    | 2.841757  | 0.705957  | -4.378772 |
| C    | 3.675889  | 1.780504  | -3.680474 |
| C    | 3.329200  | 1.621845  | -2.220071 |
| O    | 3.829411  | 2.179280  | -1.269238 |
| O    | 1.141154  | -0.759000 | -3.508432 |
| H    | 3.440859  | -0.103562 | -4.805192 |
| H    | 2.176781  | 1.085943  | -5.157582 |
| H    | 3.402632  | 2.794110  | -3.985807 |
| H    | 4.753251  | 1.661367  | -3.806734 |
| H    | 0.025563  | 2.826087  | -1.795472 |
| S    | -1.464652 | 0.116162  | -1.758882 |
| O    | -1.772988 | 0.401737  | -0.357374 |
| O    | -0.770185 | -1.186464 | -1.980593 |
| O    | -0.868386 | 1.214332  | -2.530177 |
| H    | 0.443402  | -0.991562 | -2.767579 |
| C    | -3.114994 | -0.164496 | -2.495676 |
| F    | -3.677449 | -1.225369 | -1.926561 |
| F    | -3.876767 | 0.901822  | -2.273573 |
| F    | -3.013579 | -0.368086 | -3.802056 |
| O    | -4.088462 | 0.576308  | 1.044038  |
| H    | -3.365296 | 0.174465  | 0.531709  |
| C    | -3.877802 | 1.958622  | 1.021040  |
| H    | -3.139995 | 2.270592  | 0.273622  |
| C    | -5.205912 | 2.614520  | 0.677593  |
| C    | -3.357325 | 2.404921  | 2.382013  |
| F    | -5.135446 | 3.948167  | 0.774437  |



|   |           |           |           |
|---|-----------|-----------|-----------|
| F | -5.557838 | 2.308957  | -0.575120 |
| F | -6.188221 | 2.196416  | 1.483599  |
| F | -3.011349 | 3.695749  | 2.389059  |
| F | -2.271040 | 1.689204  | 2.711648  |
| F | -4.261897 | 2.216223  | 3.351009  |
| O | 4.261610  | 0.978993  | 1.239137  |
| H | 4.162453  | 1.454783  | 0.392827  |
| C | 5.279319  | 0.035214  | 1.136475  |
| H | 6.191692  | 0.417893  | 0.662457  |
| C | 5.625733  | -0.353126 | 2.566804  |
| C | 4.815668  | -1.167937 | 0.318061  |
| F | 6.528533  | -1.337786 | 2.606088  |
| F | 6.128997  | 0.699204  | 3.216130  |
| F | 4.541557  | -0.761085 | 3.238560  |
| F | 3.776319  | -1.796757 | 0.883651  |
| F | 5.792667  | -2.063357 | 0.154049  |
| F | 4.424959  | -0.761287 | -0.899315 |

TS-6\_B

M06-2X SCF energy (au): -7870.18103749  
M06-2X enthalpy (au): -7869.72218349  
M06-2X free energy (au): -7869.84553349  
MN15 SCF energy (au): -7875.00211126  
MN15 enthalpy (au): -7874.54325726  
MN15 free energy (au): -7874.66660726  
MN15 free energy (quasi-harmonic) (au): -7874.65368777

Cartesian coordinates

| ATOM | X         | Y         | Z         |
|------|-----------|-----------|-----------|
| C    | 0.379038  | -0.176090 | 2.838092  |
| C    | 0.738748  | 1.017425  | 2.255322  |
| H    | 0.898210  | -0.465533 | 3.752554  |
| H    | 0.169195  | 1.402445  | 1.408274  |
| C    | 1.732955  | 1.932904  | 2.916064  |
| H    | 1.147568  | 2.493436  | 3.659356  |
| H    | 2.455164  | 1.337538  | 3.488303  |
| C    | 2.459245  | 2.964512  | 2.044547  |
| H    | 1.725672  | 3.563957  | 1.497751  |
| H    | 2.974462  | 3.643655  | 2.729534  |
| C    | 3.487769  | 2.416685  | 1.057643  |
| H    | 4.068805  | 1.583859  | 1.469295  |
| H    | 4.212963  | 3.197518  | 0.796940  |
| C    | 2.883923  | 1.971315  | -0.247858 |
| O    | 3.747339  | 1.291798  | -1.008359 |
| O    | 1.748700  | 2.210995  | -0.607675 |
| C    | -0.754035 | -1.029697 | 2.456477  |
| C    | -1.392440 | -0.912644 | 1.214304  |
| C    | -1.205994 | -1.986505 | 3.371014  |
| C    | -2.468972 | -1.728585 | 0.897851  |
| H    | -1.040138 | -0.194114 | 0.481387  |
| C    | -2.288637 | -2.805483 | 3.067862  |
| H    | -0.710563 | -2.089983 | 4.332338  |
| C    | -2.906929 | -2.665354 | 1.831395  |
| H    | -2.958415 | -1.638301 | -0.065802 |
| H    | -2.639850 | -3.542025 | 3.781799  |
| Br   | -4.376443 | -3.782985 | 1.398241  |
| Br   | 2.043639  | -0.670792 | 1.097643  |
| N    | 3.343596  | -1.536138 | -0.226041 |
| C    | 3.071154  | -2.277012 | -1.271742 |

|   |           |           |           |
|---|-----------|-----------|-----------|
| C | 4.291362  | -2.739054 | -1.999635 |
| C | 5.430296  | -2.059062 | -1.235225 |
| C | 4.746485  | -1.334969 | -0.095601 |
| O | 5.228395  | -0.688722 | 0.794901  |
| O | 1.897463  | -2.609003 | -1.673961 |
| H | 4.327971  | -3.831580 | -1.972445 |
| H | 4.201715  | -2.423770 | -3.042617 |
| H | 5.959657  | -1.316947 | -1.837948 |
| H | 6.163204  | -2.755553 | -0.823959 |
| H | 3.275202  | 1.009436  | -1.823448 |
| S | 0.678731  | 0.128344  | -2.736837 |
| O | 0.031966  | 1.436098  | -2.893835 |
| O | 0.202588  | -0.649978 | -1.566701 |
| O | 2.142059  | 0.091607  | -2.915145 |
| H | 1.163650  | -2.000457 | -1.354107 |
| C | 0.066019  | -0.828818 | -4.172612 |
| F | 0.561420  | -2.062025 | -4.140543 |
| F | -1.260109 | -0.894808 | -4.136781 |
| F | 0.440305  | -0.239624 | -5.302560 |
| O | -1.104532 | 1.863765  | -0.400364 |
| H | -0.673793 | 1.958264  | -1.272725 |
| C | -2.004004 | 2.894948  | -0.161491 |
| H | -2.524667 | 3.245180  | -1.060479 |
| C | -3.048812 | 2.330480  | 0.790982  |
| C | -1.269860 | 4.088442  | 0.443823  |
| F | -2.486942 | 1.840647  | 1.903664  |
| F | -3.936398 | 3.261631  | 1.156482  |
| F | -3.711510 | 1.330958  | 0.202723  |
| F | -2.086215 | 5.127968  | 0.647959  |
| F | -0.293369 | 4.484491  | -0.377950 |
| F | -0.704073 | 3.779801  | 1.621515  |

TS-7

M06-2X SCF energy (au): -9088.79557935  
M06-2X enthalpy (au): -9088.28402635  
M06-2X free energy (au): -9088.43605235  
MN15 SCF energy (au): -9093.50282394  
MN15 enthalpy (au): -9092.99127094  
MN15 free energy (au): -9093.14329694  
MN15 free energy (quasi-harmonic) (au): -9093.12563759

Cartesian coordinates

| ATOM | X         | Y         | Z         |
|------|-----------|-----------|-----------|
| C    | 0.500264  | -1.655470 | -2.234271 |
| C    | 1.243185  | -2.946213 | -2.136409 |
| H    | 2.048779  | -2.878853 | -1.401170 |
| H    | -0.573626 | -1.731787 | -2.407762 |
| C    | 0.355362  | -4.176525 | -1.968328 |
| H    | -0.227813 | -4.305316 | -2.885209 |
| H    | 1.015605  | -5.044346 | -1.877819 |
| C    | -0.605507 | -4.133495 | -0.777765 |
| H    | -1.401159 | -3.398694 | -0.945941 |
| H    | -1.090615 | -5.111667 | -0.727709 |
| C    | 0.056812  | -3.848229 | 0.563040  |
| H    | 1.019940  | -4.363423 | 0.671330  |
| H    | -0.567408 | -4.185934 | 1.396251  |
| C    | 0.291187  | -2.385570 | 0.793535  |
| O    | 0.180675  | -1.509590 | -0.071378 |
| O    | 0.608337  | -2.095465 | 2.030017  |

|    |           |           |           |
|----|-----------|-----------|-----------|
| C  | 1.078202  | -0.376807 | -2.399508 |
| C  | 2.471961  | -0.142058 | -2.299134 |
| C  | 0.203442  | 0.696904  | -2.677074 |
| C  | 2.968613  | 1.127898  | -2.493809 |
| H  | 3.157795  | -0.951981 | -2.075485 |
| C  | 0.696322  | 1.975038  | -2.866760 |
| H  | -0.862715 | 0.505886  | -2.744641 |
| C  | 2.073349  | 2.169492  | -2.774808 |
| H  | 4.031655  | 1.323829  | -2.426731 |
| H  | 0.028648  | 2.802310  | -3.078087 |
| Br | 2.769877  | 3.896598  | -3.036734 |
| Br | 2.153050  | -3.115102 | -3.889963 |
| H  | 0.634234  | -1.113110 | 2.143751  |
| S  | 0.048622  | 1.358521  | 1.004259  |
| O  | 1.347289  | 1.374612  | 0.313325  |
| O  | 0.033897  | 0.501719  | 2.218602  |
| O  | -1.128580 | 1.234668  | 0.136662  |
| C  | -0.096080 | 3.040107  | 1.708303  |
| F  | 0.941003  | 3.288129  | 2.498684  |
| F  | -0.121158 | 3.936209  | 0.728111  |
| F  | -1.215756 | 3.136906  | 2.417069  |
| O  | -2.338432 | -0.818972 | -1.187112 |
| H  | -1.658700 | -0.389794 | -0.631888 |
| C  | -3.543376 | -0.149479 | -0.969612 |
| H  | -3.551402 | 0.424107  | -0.037259 |
| C  | -3.779695 | 0.829017  | -2.115128 |
| C  | -4.639769 | -1.201627 | -0.882327 |
| F  | -4.973643 | 1.424447  | -2.030345 |
| F  | -2.841504 | 1.785426  | -2.098964 |
| F  | -3.704229 | 0.220797  | -3.305123 |
| F  | -4.364959 | -2.071253 | 0.091799  |
| F  | -4.747013 | -1.895602 | -2.023432 |
| F  | -5.831108 | -0.652924 | -0.622048 |
| O  | 2.870429  | -0.865754 | 0.623191  |
| H  | 2.298326  | -0.079678 | 0.466257  |
| C  | 3.987655  | -0.498209 | 1.366021  |
| H  | 4.597886  | -1.388559 | 1.545322  |
| C  | 4.848118  | 0.488438  | 0.582293  |
| C  | 3.594154  | 0.050497  | 2.736879  |
| F  | 4.175781  | 1.604720  | 0.276475  |
| F  | 5.943680  | 0.841751  | 1.261576  |
| F  | 5.238415  | -0.069870 | -0.572115 |
| F  | 2.979197  | 1.236571  | 2.654737  |
| F  | 4.665464  | 0.201457  | 3.523280  |
| F  | 2.754520  | -0.798177 | 3.341071  |
| O  | -1.832364 | -0.062721 | 4.218567  |
| H  | -1.278383 | 0.264608  | 3.481284  |
| C  | -2.992865 | -0.653855 | 3.724657  |
| H  | -3.582724 | -1.026362 | 4.567297  |
| C  | -3.835685 | 0.381721  | 2.986199  |
| C  | -2.682934 | -1.855560 | 2.834805  |
| F  | -4.835369 | -0.178894 | 2.292634  |
| F  | -4.361899 | 1.256748  | 3.843800  |
| F  | -3.080031 | 1.074923  | 2.119402  |
| F  | -3.771562 | -2.597789 | 2.616800  |
| F  | -1.767045 | -2.632378 | 3.414557  |
| F  | -2.199281 | -1.476759 | 1.635653  |

TS-7\_A

M06-2X SCF energy (au): -8299.22768060  
M06-2X enthalpy (au): -8298.79274760  
M06-2X free energy (au): -8298.92033560  
MN15 SCF energy (au): -8304.06979028  
MN15 enthalpy (au): -8303.63485728  
MN15 free energy (au): -8303.76244528  
MN15 free energy (quasi-harmonic) (au): -8303.74962168

Cartesian coordinates

| ATOM | X         | Y         | Z         |
|------|-----------|-----------|-----------|
| C    | 0.191681  | -0.965093 | -1.739661 |
| C    | 1.267009  | -1.987723 | -1.551075 |
| H    | 1.836103  | -1.769569 | -0.644604 |
| H    | -0.762981 | -1.328359 | -2.118970 |
| C    | 0.792402  | -3.434309 | -1.643726 |
| H    | 0.473160  | -3.632166 | -2.671656 |
| H    | 1.658508  | -4.072086 | -1.441966 |
| C    | -0.347614 | -3.795424 | -0.690789 |
| H    | -1.280309 | -3.318750 | -1.010599 |
| H    | -0.504999 | -4.874021 | -0.772233 |
| C    | -0.080592 | -3.446024 | 0.769912  |
| H    | 0.975256  | -3.580158 | 1.039416  |
| H    | -0.656677 | -4.079614 | 1.449274  |
| C    | -0.445479 | -2.028914 | 1.094120  |
| O    | -0.597450 | -1.133408 | 0.258293  |
| O    | -0.622618 | -1.811136 | 2.374928  |
| C    | 0.383880  | 0.438989  | -1.750011 |
| C    | 1.618879  | 1.049053  | -1.421425 |
| C    | -0.734431 | 1.247342  | -2.044484 |
| C    | 1.718603  | 2.421082  | -1.360665 |
| H    | 2.491677  | 0.441951  | -1.218436 |
| C    | -0.644710 | 2.626062  | -1.973412 |
| H    | -1.678576 | 0.778773  | -2.307748 |
| C    | 0.575016  | 3.190157  | -1.610155 |
| H    | 2.655783  | 2.898909  | -1.100371 |
| H    | -1.508420 | 3.250055  | -2.171239 |
| Br   | 0.684274  | 5.058486  | -1.426105 |
| Br   | 2.555095  | -1.702106 | -3.026592 |
| H    | -0.882138 | -0.866419 | 2.543841  |
| S    | -1.263541 | 1.573228  | 1.550952  |
| O    | 0.137867  | 1.665509  | 1.113312  |
| O    | -1.460302 | 0.725063  | 2.746791  |
| O    | -2.269101 | 1.383152  | 0.492315  |
| C    | -1.614195 | 3.270802  | 2.133196  |
| F    | -1.394824 | 4.126288  | 1.138022  |
| F    | -2.878957 | 3.376103  | 2.526075  |
| F    | -0.817578 | 3.578676  | 3.151171  |
| O    | -3.011943 | -0.804798 | -1.015339 |
| H    | -2.623720 | -0.111019 | -0.439620 |
| C    | -4.203384 | -1.246658 | -0.444810 |
| H    | -4.905653 | -0.437050 | -0.208797 |
| C    | -4.856950 | -2.144640 | -1.483536 |
| C    | -3.913300 | -1.986656 | 0.857704  |
| F    | -4.049930 | -3.151792 | -1.839074 |
| F    | -5.998644 | -2.671871 | -1.031713 |
| F    | -5.131854 | -1.441040 | -2.585239 |
| F    | -5.025721 | -2.444748 | 1.436682  |
| F    | -3.309850 | -1.154136 | 1.714187  |
| F    | -3.089887 | -3.031191 | 0.672494  |

|   |          |           |           |
|---|----------|-----------|-----------|
| O | 1.877947 | -0.476788 | 1.207494  |
| H | 1.367437 | 0.348644  | 1.342335  |
| C | 3.077169 | -0.484763 | 1.910596  |
| H | 3.099514 | 0.198999  | 2.766193  |
| C | 3.253903 | -1.902097 | 2.439825  |
| C | 4.199627 | -0.086142 | 0.957581  |
| F | 3.283531 | -2.796040 | 1.436897  |
| F | 4.382440 | -2.038965 | 3.140076  |
| F | 2.228865 | -2.224605 | 3.231400  |
| F | 4.040549 | 1.191004  | 0.585033  |
| F | 4.177458 | -0.829486 | -0.161236 |
| F | 5.409193 | -0.209103 | 1.507574  |

TS-7\_B

M06-2X SCF energy (au): -7509.64972073  
M06-2X enthalpy (au): -7509.29143173  
M06-2X free energy (au): -7509.39883173  
MN15 SCF energy (au): -7514.63395691  
MN15 enthalpy (au): -7514.27566791  
MN15 free energy (au): -7514.38306791  
MN15 free energy (quasi-harmonic) (au): -7514.37139818

Cartesian coordinates

| ATOM | X         | Y         | Z         |
|------|-----------|-----------|-----------|
| C    | 2.060442  | 0.745340  | -1.831278 |
| C    | 3.511239  | 0.940416  | -1.539068 |
| H    | 3.711961  | 0.819480  | -0.472390 |
| H    | 1.820768  | 0.248050  | -2.771159 |
| C    | 4.462916  | 0.150659  | -2.433108 |
| H    | 4.376793  | 0.538946  | -3.452651 |
| H    | 5.480292  | 0.362303  | -2.090419 |
| C    | 4.234741  | -1.362138 | -2.466917 |
| H    | 3.295807  | -1.595336 | -2.980114 |
| H    | 5.035813  | -1.785779 | -3.078317 |
| C    | 4.245083  | -2.047750 | -1.106867 |
| H    | 5.010752  | -1.628463 | -0.441274 |
| H    | 4.471399  | -3.113773 | -1.200486 |
| C    | 2.927040  | -1.951694 | -0.394311 |
| O    | 2.015000  | -1.186838 | -0.713536 |
| O    | 2.819200  | -2.781693 | 0.616972  |
| C    | 0.997103  | 1.359158  | -1.144212 |
| C    | 1.184102  | 2.061773  | 0.073016  |
| C    | -0.295135 | 1.271715  | -1.714125 |
| C    | 0.112223  | 2.663282  | 0.692138  |
| H    | 2.166008  | 2.126959  | 0.529036  |
| C    | -1.370878 | 1.885938  | -1.103926 |
| H    | -0.432756 | 0.721370  | -2.639523 |
| C    | -1.150242 | 2.564407  | 0.095059  |
| H    | 0.237026  | 3.192110  | 1.629852  |
| H    | -2.363576 | 1.830038  | -1.533177 |
| Br   | -2.612249 | 3.367292  | 0.958126  |
| Br   | 3.820628  | 2.864389  | -1.913452 |
| H    | 1.926218  | -2.679992 | 1.059521  |
| S    | 0.272229  | -0.908003 | 1.902379  |
| O    | 1.497091  | -0.136322 | 2.125236  |
| O    | 0.487353  | -2.368084 | 1.747462  |
| O    | -0.679479 | -0.347146 | 0.927147  |
| C    | -0.643132 | -0.784649 | 3.479672  |
| F    | 0.101769  | -1.247004 | 4.479458  |

|   |           |           |           |
|---|-----------|-----------|-----------|
| F | -0.944355 | 0.488885  | 3.719694  |
| F | -1.766624 | -1.490432 | 3.416149  |
| O | -0.725704 | -1.763413 | -1.386093 |
| H | -0.680446 | -1.246448 | -0.548201 |
| C | -1.973939 | -2.365695 | -1.502135 |
| H | -1.997907 | -2.951614 | -2.426246 |
| C | -2.227386 | -3.340721 | -0.354182 |
| C | -3.072814 | -1.313354 | -1.613338 |
| F | -2.358541 | -2.715912 | 0.823083  |
| F | -3.342274 | -4.054093 | -0.558722 |
| F | -1.203990 | -4.192337 | -0.251120 |
| F | -3.140782 | -0.536908 | -0.525248 |
| F | -4.276049 | -1.867526 | -1.795611 |
| F | -2.826076 | -0.511386 | -2.659114 |

TS-8

|                                         |                |
|-----------------------------------------|----------------|
| M06-2X SCF energy (au):                 | -9088.78961798 |
| M06-2X enthalpy (au):                   | -9088.27898098 |
| M06-2X free energy (au):                | -9088.43501198 |
| MN15 SCF energy (au):                   | -9093.49607318 |
| MN15 enthalpy (au):                     | -9092.98543618 |
| MN15 free energy (au):                  | -9093.14146718 |
| MN15 free energy (quasi-harmonic) (au): | -9093.12081420 |

Cartesian coordinates

| ATOM | X         | Y         | Z         |
|------|-----------|-----------|-----------|
| C    | -1.860129 | 1.991278  | -1.452596 |
| C    | -1.725020 | 2.378173  | -0.046542 |
| H    | -1.412568 | 2.692702  | -2.156699 |
| H    | -2.005639 | 1.667232  | 0.729252  |
| C    | -1.329564 | 3.760458  | 0.362148  |
| H    | -2.175712 | 4.176416  | 0.917217  |
| H    | -1.158523 | 4.382161  | -0.522530 |
| C    | -0.113250 | 3.812851  | 1.299778  |
| H    | -0.283714 | 3.155802  | 2.159088  |
| H    | -0.055089 | 4.836680  | 1.674981  |
| C    | 1.200767  | 3.463566  | 0.616480  |
| H    | 1.324776  | 4.021533  | -0.320547 |
| H    | 2.059040  | 3.700897  | 1.249880  |
| C    | 1.261926  | 2.007126  | 0.282016  |
| O    | 0.255418  | 1.309040  | 0.161968  |
| O    | 2.477489  | 1.533498  | 0.136107  |
| C    | -1.931431 | 0.593767  | -1.920305 |
| C    | -2.313840 | -0.454228 | -1.079883 |
| C    | -1.604327 | 0.335361  | -3.255637 |
| C    | -2.356757 | -1.753947 | -1.562949 |
| H    | -2.565406 | -0.276028 | -0.039430 |
| C    | -1.640102 | -0.962813 | -3.747513 |
| H    | -1.296723 | 1.149063  | -3.905784 |
| C    | -2.014786 | -1.992226 | -2.890368 |
| H    | -2.631937 | -2.572452 | -0.907685 |
| H    | -1.370481 | -1.168310 | -4.776995 |
| Br   | -2.048879 | -3.769359 | -3.538012 |
| Br   | -3.769039 | 2.715884  | -1.104725 |
| H    | 2.464547  | 0.548440  | 0.058369  |
| S    | 1.059699  | -1.648862 | -0.335589 |
| O    | -0.127905 | -1.774383 | 0.520869  |
| O    | 0.897478  | -1.002278 | -1.644260 |
| O    | 2.256125  | -1.169025 | 0.413608  |

|   |           |           |           |
|---|-----------|-----------|-----------|
| C | 1.459740  | -3.379303 | -0.771544 |
| F | 1.646472  | -4.092599 | 0.332779  |
| F | 2.563862  | -3.417871 | -1.507442 |
| F | 0.453057  | -3.897878 | -1.464819 |
| O | 1.010874  | 1.646127  | -2.484336 |
| H | 0.848311  | 0.779721  | -2.057704 |
| C | 2.197414  | 1.560347  | -3.210203 |
| H | 2.950284  | 0.914953  | -2.741250 |
| C | 2.761110  | 2.971723  | -3.271618 |
| C | 1.895286  | 0.996194  | -4.594453 |
| F | 1.847721  | 3.841169  | -3.718289 |
| F | 3.828463  | 3.045673  | -4.072048 |
| F | 3.131815  | 3.372472  | -2.049921 |
| F | 1.325749  | -0.208015 | -4.468910 |
| F | 1.040459  | 1.777528  | -5.268703 |
| F | 2.997514  | 0.856733  | -5.337007 |
| O | -1.216615 | 0.242643  | 2.105557  |
| H | -0.620647 | -0.342458 | 1.598333  |
| C | -1.751311 | -0.456020 | 3.182931  |
| H | -1.117942 | -1.283894 | 3.520424  |
| C | -1.862836 | 0.550447  | 4.317454  |
| C | -3.102995 | -1.027071 | 2.774345  |
| F | -2.533865 | 1.643221  | 3.932766  |
| F | -2.479546 | 0.042918  | 5.388062  |
| F | -0.639466 | 0.947227  | 4.694291  |
| F | -3.933043 | -0.064492 | 2.348734  |
| F | -3.705975 | -1.681594 | 3.769940  |
| F | -2.933891 | -1.886479 | 1.758569  |
| O | 1.220493  | -1.122307 | 3.009885  |
| H | 1.719943  | -1.217507 | 2.172423  |
| C | 2.027714  | -0.535066 | 3.978450  |
| H | 1.440594  | -0.391929 | 4.889355  |
| C | 3.192993  | -1.460567 | 4.314538  |
| C | 2.523443  | 0.839235  | 3.532294  |
| F | 2.746886  | -2.561645 | 4.923701  |
| F | 3.835780  | -1.847623 | 3.204314  |
| F | 4.081389  | -0.868051 | 5.120342  |
| F | 3.012452  | 1.543841  | 4.555623  |
| F | 1.514628  | 1.538019  | 2.993782  |
| F | 3.487093  | 0.742585  | 2.606116  |

#### TS-8\_A

M06-2X SCF energy (au): -8299.22004119  
M06-2X enthalpy (au): -8298.78540119  
M06-2X free energy (au): -8298.91763419  
MN15 SCF energy (au): -8304.06126703  
MN15 enthalpy (au): -8303.62662703  
MN15 free energy (au): -8303.75886003  
MN15 free energy (quasi-harmonic) (au): -8303.74226084

#### Cartesian coordinates

| ATOM | X         | Y        | Z         |
|------|-----------|----------|-----------|
| C    | 0.820631  | 0.643158 | -2.560193 |
| C    | 0.232695  | 1.926360 | -2.170191 |
| H    | 1.891210  | 0.668615 | -2.766499 |
| H    | -0.804867 | 1.940493 | -1.846603 |
| C    | 1.045401  | 3.189337 | -2.200505 |
| H    | 0.384761  | 4.038081 | -2.010895 |
| H    | 1.458140  | 3.307476 | -3.205568 |

|    |           |           |           |
|----|-----------|-----------|-----------|
| C  | 2.237868  | 3.195736  | -1.223644 |
| H  | 2.892751  | 4.009501  | -1.543444 |
| H  | 2.813082  | 2.268880  | -1.316577 |
| C  | 1.868807  | 3.427759  | 0.231303  |
| H  | 2.763858  | 3.496796  | 0.853105  |
| H  | 1.321356  | 4.371306  | 0.352224  |
| C  | 0.992983  | 2.349945  | 0.793512  |
| O  | 0.286501  | 1.616753  | 0.104002  |
| O  | 1.027896  | 2.273224  | 2.104137  |
| C  | 0.297237  | -0.669801 | -2.147658 |
| C  | -1.060344 | -0.887994 | -1.889951 |
| C  | 1.213516  | -1.717485 | -2.008581 |
| C  | -1.498150 | -2.139237 | -1.486051 |
| H  | -1.789605 | -0.091529 | -2.010586 |
| C  | 0.783278  | -2.974455 | -1.600620 |
| H  | 2.268840  | -1.545257 | -2.200600 |
| C  | -0.569098 | -3.166843 | -1.343357 |
| H  | -2.547141 | -2.309981 | -1.272934 |
| H  | 1.491305  | -3.785925 | -1.480485 |
| Br | -1.173476 | -4.869111 | -0.785829 |
| Br | -0.090088 | 1.289750  | -4.319612 |
| H  | 0.416897  | 1.558344  | 2.432673  |
| S  | -0.833974 | -0.695281 | 1.848343  |
| O  | -2.000929 | -0.343185 | 1.024991  |
| O  | 0.353093  | -1.189623 | 1.131160  |
| O  | -0.529559 | 0.277439  | 2.921234  |
| C  | -1.407427 | -2.177679 | 2.751311  |
| F  | -1.708507 | -3.134556 | 1.879807  |
| F  | -2.486101 | -1.889325 | 3.471318  |
| F  | -0.450089 | -2.614810 | 3.562691  |
| O  | 2.575481  | 0.083914  | 0.184076  |
| H  | 1.670951  | -0.225612 | 0.400486  |
| C  | 3.449913  | -0.433120 | 1.138191  |
| H  | 2.961928  | -0.671377 | 2.090731  |
| C  | 4.492019  | 0.643624  | 1.400274  |
| C  | 4.067570  | -1.716336 | 0.595650  |
| F  | 5.488439  | 0.201203  | 2.172851  |
| F  | 3.925387  | 1.686963  | 2.018310  |
| F  | 5.024134  | 1.093468  | 0.257306  |
| F  | 3.098783  | -2.605036 | 0.344236  |
| F  | 4.721085  | -1.495972 | -0.553188 |
| F  | 4.924690  | -2.275410 | 1.455187  |
| O  | -2.576206 | 1.678179  | -0.693310 |
| H  | -2.264368 | 1.048703  | -0.001970 |
| C  | -3.245117 | 2.751235  | -0.110637 |
| H  | -3.578175 | 3.432849  | -0.898831 |
| C  | -4.491466 | 2.271237  | 0.627699  |
| C  | -2.299985 | 3.529162  | 0.797829  |
| F  | -5.209305 | 3.295430  | 1.101128  |
| F  | -5.266410 | 1.572337  | -0.205531 |
| F  | -4.180767 | 1.475812  | 1.658085  |
| F  | -1.274118 | 4.008942  | 0.078183  |
| F  | -1.788481 | 2.747066  | 1.757233  |
| F  | -2.903713 | 4.563901  | 1.387601  |

TS-8\_B

M06-2X SCF energy (au): -7509.64424739  
M06-2X enthalpy (au): -7509.28597939  
M06-2X free energy (au): -7509.39319239



MN15 SCF energy (au): -7514.62652162  
MN15 enthalpy (au): -7514.26825362  
MN15 free energy (au): -7514.37546662  
MN15 free energy (quasi-harmonic) (au): -7514.36500023

Cartesian coordinates

| ATOM | X         | Y         | Z         |
|------|-----------|-----------|-----------|
| C    | 0.893566  | -2.640659 | 0.998302  |
| C    | 2.244525  | -2.153912 | 0.748434  |
| H    | 0.688484  | -2.911934 | 2.033672  |
| H    | 2.447549  | -1.669554 | -0.205764 |
| C    | 3.340100  | -2.196811 | 1.770070  |
| H    | 4.061852  | -2.947434 | 1.437691  |
| H    | 2.938998  | -2.525131 | 2.734766  |
| C    | 4.112383  | -0.873687 | 1.892502  |
| H    | 4.344707  | -0.496374 | 0.892505  |
| H    | 5.065313  | -1.107686 | 2.372259  |
| C    | 3.422701  | 0.201128  | 2.717633  |
| H    | 3.259004  | -0.139855 | 3.747741  |
| H    | 4.040830  | 1.101103  | 2.780728  |
| C    | 2.084118  | 0.602600  | 2.175410  |
| O    | 1.448315  | -0.061324 | 1.362789  |
| O    | 1.643381  | 1.743912  | 2.661532  |
| C    | -0.280054 | -2.304865 | 0.180781  |
| C    | -0.176428 | -1.917804 | -1.162351 |
| C    | -1.537109 | -2.418991 | 0.780218  |
| C    | -1.318969 | -1.633941 | -1.892276 |
| H    | 0.787968  | -1.842991 | -1.656564 |
| C    | -2.689604 | -2.146372 | 0.051810  |
| H    | -1.617351 | -2.725942 | 1.819020  |
| C    | -2.563885 | -1.756660 | -1.275194 |
| H    | -1.244057 | -1.326989 | -2.929314 |
| H    | -3.665792 | -2.233205 | 0.514324  |
| Br   | -4.123396 | -1.385345 | -2.277053 |
| Br   | 1.883010  | -4.300123 | 0.174929  |
| H    | 0.751500  | 1.978165  | 2.284496  |
| S    | -1.744671 | 1.843052  | 1.075110  |
| O    | -2.936707 | 2.625953  | 0.759638  |
| O    | -1.347999 | 0.843047  | 0.072473  |
| O    | -0.614888 | 2.644135  | 1.607630  |
| C    | -2.225636 | 0.819154  | 2.514028  |
| F    | -2.587204 | 1.597439  | 3.529582  |
| F    | -1.197074 | 0.064497  | 2.900073  |
| F    | -3.244458 | 0.024410  | 2.199836  |
| O    | 0.963806  | 0.920658  | -1.375717 |
| H    | 0.156174  | 0.714516  | -0.861230 |
| C    | 1.390845  | 2.184815  | -0.967765 |
| H    | 1.163435  | 2.409344  | 0.080946  |
| C    | 0.700736  | 3.249835  | -1.811872 |
| C    | 2.901101  | 2.211613  | -1.125041 |
| F    | -0.626659 | 3.141167  | -1.668405 |
| F    | 0.979790  | 3.108606  | -3.113021 |
| F    | 1.051890  | 4.488017  | -1.448369 |
| F    | 3.278570  | 1.849936  | -2.354637 |
| F    | 3.409108  | 3.421657  | -0.875272 |
| F    | 3.463322  | 1.348737  | -0.262812 |

TfOH

M06-2X SCF energy (au): -961.780651031

M06-2X enthalpy (au): -961.732416031  
M06-2X free energy (au): -961.774214031  
MN15 SCF energy (au): -961.672607698  
MN15 enthalpy (au): -961.624372698  
MN15 free energy (au): -961.666170698  
MN15 free energy (quasi-harmonic) (au): -961.665240667

Cartesian coordinates

| ATOM | X         | Y         | Z         |
|------|-----------|-----------|-----------|
| S    | -2.207116 | 0.177469  | -1.041031 |
| O    | -0.766047 | 0.181107  | -1.031043 |
| O    | -2.984668 | 1.395184  | -1.048480 |
| O    | -2.682559 | -0.782054 | 0.121852  |
| H    | -3.576973 | -0.560117 | 0.453584  |
| C    | -2.728998 | -0.803506 | -2.504417 |
| F    | -2.118650 | -1.974172 | -2.484670 |
| F    | -4.039301 | -0.974011 | -2.463709 |
| F    | -2.392931 | -0.134321 | -3.593384 |

11

M06-2X SCF energy (au): -576.627854649  
M06-2X enthalpy (au): -576.407377649  
M06-2X free energy (au): -576.460459649  
MN15 SCF energy (au): -576.345689165  
MN15 enthalpy (au): -576.125212165  
MN15 free energy (au): -576.178294165  
MN15 free energy (quasi-harmonic) (au): -576.175727516

Cartesian coordinates

| ATOM | X         | Y         | Z         |
|------|-----------|-----------|-----------|
| C    | -0.181059 | 0.930906  | 0.192119  |
| C    | 0.740102  | 0.969688  | -0.775863 |
| H    | 0.105073  | 1.258843  | 1.192159  |
| H    | 0.500046  | 0.606284  | -1.775757 |
| C    | 2.145951  | 1.457934  | -0.578589 |
| H    | 2.381296  | 2.214889  | -1.334864 |
| H    | 2.248452  | 1.928501  | 0.404071  |
| C    | 3.167580  | 0.326242  | -0.705549 |
| H    | 3.038563  | -0.238253 | -1.634472 |
| H    | 4.190915  | 0.720353  | -0.717529 |
| C    | -1.570572 | 0.456500  | 0.058267  |
| C    | -2.312534 | 0.199468  | 1.219029  |
| C    | -2.189896 | 0.255116  | -1.184780 |
| C    | -3.623789 | -0.262463 | 1.145598  |
| H    | -1.848377 | 0.360891  | 2.188838  |
| C    | -3.498954 | -0.206922 | -1.258867 |
| H    | -1.650605 | 0.475948  | -2.101344 |
| C    | -4.221783 | -0.470721 | -0.094856 |
| H    | -4.178470 | -0.458372 | 2.058435  |
| H    | -3.961806 | -0.354538 | -2.230200 |
| C    | 3.093057  | -0.635827 | 0.449445  |
| O    | 2.540337  | -0.420513 | 1.507645  |
| O    | 3.743776  | -1.780312 | 0.198488  |
| H    | 3.693620  | -2.344485 | 0.989843  |
| H    | -5.245143 | -0.827977 | -0.156537 |

10

M06-2X SCF energy (au): -1109.82740482  
M06-2X enthalpy (au): -1109.50411682

M06-2X free energy (au): -1109.57095582  
MN15 SCF energy (au): -1109.45791665  
MN15 enthalpy (au): -1109.13462865  
MN15 free energy (au): -1109.20146765  
MN15 free energy (quasi-harmonic) (au): -1109.19703383

Cartesian coordinates

| ATOM | X         | Y         | Z         |
|------|-----------|-----------|-----------|
| C    | 1.232096  | 1.291869  | 0.778886  |
| C    | 2.494325  | 2.152595  | 0.726780  |
| C    | 3.174157  | 2.127316  | -0.647588 |
| C    | 2.386644  | 2.884225  | -1.679853 |
| C    | 1.917722  | 2.372299  | -2.815820 |
| H    | 2.086556  | 1.331110  | -3.080363 |
| H    | 1.356241  | 2.977642  | -3.522242 |
| H    | 3.315776  | 1.089619  | -0.972379 |
| H    | 4.169412  | 2.579204  | -0.553501 |
| H    | 3.187014  | 1.800551  | 1.500496  |
| H    | 2.223553  | 3.183954  | 0.984238  |
| C    | 0.399454  | 1.548909  | 2.028376  |
| N    | 1.631660  | -0.133888 | 0.698402  |
| H    | 0.632810  | 1.508725  | -0.114346 |
| H    | -0.492540 | 0.915075  | 2.049174  |
| H    | 0.079993  | 2.593904  | 2.061498  |
| H    | 0.990886  | 1.345067  | 2.928183  |
| S    | 0.834028  | -1.128959 | -0.339067 |
| C    | -0.893975 | -1.073691 | 0.048815  |
| C    | -1.374388 | -1.870856 | 1.088255  |
| C    | -1.720025 | -0.181704 | -0.627472 |
| C    | -2.710135 | -1.764446 | 1.448449  |
| H    | -0.713824 | -2.566600 | 1.597251  |
| C    | -3.567633 | -0.872170 | 0.789405  |
| H    | -3.099418 | -2.383267 | 2.252389  |
| C    | -3.056840 | -0.089292 | -0.249036 |
| C    | -5.014363 | -0.781732 | 1.190336  |
| H    | -3.713247 | 0.600885  | -0.771039 |
| H    | -1.327106 | 0.420625  | -1.440849 |
| H    | -5.541675 | -1.706645 | 0.934359  |
| H    | -5.111055 | -0.640620 | 2.270796  |
| H    | -5.515146 | 0.046713  | 0.685176  |
| O    | 0.995178  | -0.566678 | -1.678298 |
| O    | 1.323218  | -2.476356 | -0.048734 |
| H    | 2.192205  | 3.933583  | -1.449885 |
| H    | 1.756442  | -0.585147 | 1.605265  |

TS-9

M06-2X SCF energy (au): -5877.02450018  
M06-2X enthalpy (au): -5876.48539118  
M06-2X free energy (au): -5876.62403618  
MN15 SCF energy (au): -5878.93404320  
MN15 enthalpy (au): -5878.39493420  
MN15 free energy (au): -5878.53357920  
MN15 free energy (quasi-harmonic) (au): -5878.52144102

Cartesian coordinates

| ATOM | X        | Y        | Z         |
|------|----------|----------|-----------|
| C    | 2.367518 | 2.234050 | -1.987084 |
| C    | 1.046571 | 2.256903 | -2.458222 |
| H    | 0.362385 | 2.974662 | -2.012720 |

|    |           |           |           |
|----|-----------|-----------|-----------|
| H  | 3.101769  | 1.673035  | -2.564446 |
| C  | 0.625875  | 1.661793  | -3.769356 |
| H  | 0.747531  | 2.464939  | -4.507359 |
| H  | 1.297328  | 0.847989  | -4.058374 |
| C  | -0.840347 | 1.202208  | -3.809094 |
| H  | -1.512723 | 1.996695  | -3.481581 |
| H  | -1.088320 | 0.935847  | -4.841177 |
| C  | 2.881238  | 3.087164  | -0.913308 |
| C  | 2.027415  | 3.705744  | 0.012048  |
| C  | 4.265788  | 3.244890  | -0.798038 |
| C  | 2.561510  | 4.473274  | 1.035973  |
| H  | 0.953442  | 3.545200  | -0.032483 |
| C  | 4.795512  | 4.023989  | 0.226620  |
| H  | 4.922591  | 2.753465  | -1.510374 |
| C  | 3.944942  | 4.632095  | 1.146656  |
| H  | 1.900619  | 4.937900  | 1.760746  |
| H  | 5.870439  | 4.148365  | 0.311193  |
| Br | 1.126557  | 0.595653  | -0.987014 |
| N  | 0.418635  | -1.146859 | 0.266214  |
| C  | 0.030294  | -2.388774 | -0.114779 |
| C  | -0.064739 | -3.321914 | 1.076216  |
| C  | 0.307056  | -2.432546 | 2.260046  |
| C  | 0.602942  | -1.098485 | 1.612003  |
| O  | 0.948564  | -0.077254 | 2.219172  |
| O  | -0.228918 | -2.731962 | -1.276757 |
| H  | -1.078786 | -3.727130 | 1.121512  |
| H  | 0.626394  | -4.154013 | 0.919003  |
| H  | 1.194711  | -2.763063 | 2.805010  |
| H  | -0.502861 | -2.297337 | 2.981288  |
| O  | -0.590548 | 2.086850  | 1.353779  |
| H  | 0.075024  | 1.424837  | 1.629240  |
| C  | -1.715842 | 1.422985  | 0.858631  |
| H  | -1.486016 | 0.534618  | 0.256396  |
| C  | -2.594360 | 0.993554  | 2.030265  |
| C  | -2.422192 | 2.412684  | -0.052556 |
| F  | -1.948428 | 0.069546  | 2.756647  |
| F  | -2.865633 | 2.023340  | 2.838815  |
| F  | -3.759829 | 0.466335  | 1.640739  |
| F  | -1.618811 | 2.738268  | -1.077979 |
| F  | -2.718914 | 3.546811  | 0.592863  |
| F  | -3.552313 | 1.918335  | -0.556967 |
| O  | -2.656632 | -3.975946 | -1.018391 |
| H  | -1.707758 | -3.857026 | -1.214055 |
| C  | -3.320615 | -2.836056 | -1.482268 |
| H  | -2.719868 | -2.233999 | -2.172259 |
| C  | -4.557296 | -3.313751 | -2.228225 |
| C  | -3.676422 | -1.941699 | -0.298578 |
| F  | -5.323366 | -2.292513 | -2.628720 |
| F  | -4.192857 | -4.005801 | -3.312722 |
| F  | -5.310339 | -4.119671 | -1.471204 |
| F  | -4.482564 | -2.565477 | 0.569398  |
| F  | -4.277312 | -0.815775 | -0.684418 |
| F  | -2.559820 | -1.608694 | 0.374893  |
| O  | 3.276278  | 1.279289  | 1.593920  |
| H  | 2.451975  | 0.776180  | 1.762110  |
| C  | 4.376624  | 0.431429  | 1.597430  |
| H  | 5.283555  | 1.035276  | 1.487882  |
| C  | 4.488419  | -0.311392 | 2.925959  |
| C  | 4.329422  | -0.524107 | 0.409017  |

|   |           |           |           |
|---|-----------|-----------|-----------|
| F | 3.454062  | -1.144723 | 3.116064  |
| F | 5.611326  | -1.033188 | 3.002622  |
| F | 4.489877  | 0.563989  | 3.933563  |
| F | 5.380948  | -1.348630 | 0.385834  |
| F | 4.321105  | 0.164358  | -0.737667 |
| F | 3.219751  | -1.280116 | 0.427648  |
| C | -1.087533 | -0.015737 | -2.952522 |
| O | -1.871709 | -0.058089 | -2.021122 |
| O | -0.335478 | -1.049261 | -3.314133 |
| H | -0.344359 | -1.731808 | -2.585093 |
| H | 4.357557  | 5.228347  | 1.954684  |

TS-10

M06-2X SCF energy (au): -5877.00011851  
M06-2X enthalpy (au): -5876.46155251  
M06-2X free energy (au): -5876.60395251  
MN15 SCF energy (au): -5878.91386848  
MN15 enthalpy (au): -5878.37530248  
MN15 free energy (au): -5878.51770248  
MN15 free energy (quasi-harmonic) (au): -5878.50215597

Cartesian coordinates

| ATOM | X         | Y         | Z         |
|------|-----------|-----------|-----------|
| C    | 0.910323  | 2.700595  | -1.601700 |
| C    | 0.103473  | 2.045290  | -2.567944 |
| H    | 1.977649  | 2.533986  | -1.760606 |
| H    | -0.746224 | 2.586949  | -2.980795 |
| C    | 0.503320  | 0.793428  | -3.254637 |
| H    | 1.031601  | 1.099580  | -4.169385 |
| H    | 1.199596  | 0.229992  | -2.631770 |
| C    | -0.719908 | -0.049747 | -3.607915 |
| H    | -1.258091 | 0.354207  | -4.473389 |
| H    | -0.461676 | -1.086517 | -3.825936 |
| C    | 0.511862  | 4.063768  | -1.161538 |
| C    | 1.460489  | 5.079427  | -1.031055 |
| C    | -0.826506 | 4.327606  | -0.849286 |
| C    | 1.071526  | 6.350351  | -0.612884 |
| H    | 2.502608  | 4.873908  | -1.261399 |
| C    | -1.213827 | 5.598117  | -0.438855 |
| H    | -1.562805 | 3.530676  | -0.926291 |
| C    | -0.264621 | 6.613593  | -0.318907 |
| H    | 1.814828  | 7.136072  | -0.517569 |
| H    | -2.255652 | 5.792701  | -0.201710 |
| Br   | 0.807928  | 1.385559  | 0.112255  |
| N    | 0.686151  | 0.060281  | 1.913466  |
| C    | -0.385257 | -0.741113 | 2.085279  |
| C    | -0.412389 | -1.337772 | 3.477750  |
| C    | 0.908995  | -0.865495 | 4.085376  |
| C    | 1.511186  | 0.011876  | 3.000956  |
| O    | 2.605562  | 0.565942  | 3.067553  |
| O    | -1.206930 | -0.985374 | 1.187097  |
| H    | -1.294274 | -0.963845 | 4.004115  |
| H    | -0.503558 | -2.422888 | 3.395988  |
| H    | 1.606892  | -1.682383 | 4.287439  |
| H    | 0.797184  | -0.280811 | 5.001204  |
| O    | -3.619869 | -0.422334 | 0.226292  |
| H    | -2.895015 | -0.923305 | 0.655940  |
| C    | -3.456566 | 0.919216  | 0.596131  |
| H    | -2.420026 | 1.259506  | 0.489380  |

|   |           |           |           |
|---|-----------|-----------|-----------|
| C | -4.341126 | 1.757032  | -0.325248 |
| C | -3.871511 | 1.115875  | 2.052101  |
| F | -5.630321 | 1.701708  | 0.034233  |
| F | -3.970779 | 3.042918  | -0.300499 |
| F | -4.264846 | 1.328536  | -1.587805 |
| F | -3.994266 | 2.416868  | 2.343632  |
| F | -2.946018 | 0.598261  | 2.872119  |
| F | -5.029766 | 0.515318  | 2.330156  |
| O | 0.342401  | -1.574078 | -0.943802 |
| H | -0.318531 | -1.234923 | -0.293883 |
| C | 0.402737  | -2.961438 | -0.905440 |
| H | 1.243558  | -3.282544 | -1.527293 |
| C | 0.653295  | -3.540037 | 0.498796  |
| C | -0.861798 | -3.586471 | -1.487921 |
| F | 1.297505  | -4.706814 | 0.418889  |
| F | 1.397010  | -2.704353 | 1.236767  |
| F | -0.479506 | -3.757902 | 1.183013  |
| F | -0.833562 | -4.920298 | -1.361606 |
| F | -0.975665 | -3.297530 | -2.787393 |
| F | -1.964367 | -3.139777 | -0.874482 |
| O | 4.044968  | 0.473576  | 0.772419  |
| H | 3.488202  | 0.706739  | 1.548478  |
| C | 3.520051  | -0.674071 | 0.180887  |
| H | 2.435182  | -0.783292 | 0.299744  |
| C | 3.786520  | -0.575635 | -1.313052 |
| C | 4.180622  | -1.904975 | 0.791370  |
| F | 5.090537  | -0.642510 | -1.603300 |
| F | 3.167298  | -1.554676 | -1.987640 |
| F | 3.334513  | 0.591833  | -1.790331 |
| F | 3.814420  | -3.033789 | 0.164520  |
| F | 3.830798  | -2.012318 | 2.079636  |
| F | 5.514468  | -1.831898 | 0.745881  |
| C | -1.656041 | 0.022044  | -2.435441 |
| O | -1.549759 | 0.928167  | -1.615979 |
| O | -2.587988 | -0.898959 | -2.368425 |
| H | -3.129439 | -0.754156 | -1.555940 |
| H | -0.565629 | 7.604515  | 0.006717  |
